# Supplementary material
Source: Research Square preprint supplement (doi:10.21203/rs.3.rs-9159771/v1)
Supplement: Supplementary file 1 [file 6d86302655a72199211fef79.xlsx]

## Sheet: MASTER
seqnames	start	end	width	location	seqCG	CG	annotation	geneChr	geneStart	geneEnd	geneLength	geneStrand	geneId	transcriptId	distanceToTSS	ENSEMBL	SYMBOL	GENENAME	pvalue_Cis_extreme	FDR_Cis_extreme	FC_Cis_extreme	pvalue_Radio_extreme	FDR_Radio_extreme	FC_Radio_extreme	pvalue_Cis_Low	FDR_Cis_Low	FC_Cis_Low	pvalue_Radio_Low	FDR_Radio_Low	FC_Radio_Low	pvalue_Cis_High	FDR_Cis_High	FC_Cis_High	pvalue_Radio_High	FDR_Radio_High	FC_Radio_High
chr1	132476	132746	271	chr1:132476-132746	5	GGGAGGAGCCAGAGGGCAACAAGGGCTTTGGTGGGAAGGTATTTGCACCTGTCATTCCTTCCTCCTTTACTCCTGCCGCCCCTTGCTGGATCCTGAGCCCCCAGGGTCCCCCGATCCACCTGCAGCTTTTGGCAGTCTATGGTCACACCCTGTCCTCCTCCTACACATACTCGGATGCTTCCTCCTCAACCTTGGCACCCACCTCCTTCTTACTGGGCCCAGGAGCCTTCAAAGCCCAGGAGTCTGGTCAACGCAGCAGAGCGGGCCCCCT	Promoter (<=1kb)	1	120725	133723	12999	2	100996442	ENST00000610542.1	977	ENSG00000238009	LOC100996442	uncharacterized LOC100996442	1	1	-0.767014	0.113079	0.704072	-23.9011	0.693404	0.845217	0.766423	0.114587	0.682531	-2.64416	0.689972	0.838465	-1.68517	0.173516	0.781216	-23.3706
chr1	394060	394253	194	chr1:394060-394253	0	GAGGGGCCAACTCTGACTCCCAAGAAGGTGACCTCTATCTCCCTTCCAGGGCCAGAGATGCAACATCACACACACACTGCCTTTGGAATGTGTGATTAAGCTTTTGGCTGCCAGTAGCCTGACAGCTTCCAGCAGCTTTGTCTGCCACCATGTCCACTTCTCTGTGCCAAAGTCACTGAAACAAAGGGACTGCA	Intron (ENST00000455207.5/112268260, intron 1 of 2)	1	365615	379972	14358	2	112268260	ENST00000440163.1	-14088	NA	LOC112268260	uncharacterized LOC112268260	0.629989	0.849049	-1.27096	0.692012	0.951591	-0.479898	0.421537	0.84435	-1.17745	0.784418	0.906638	0.906138	0.939976	1	-0.853783	0.407243	0.781216	-1.4201
chr1	488582	488733	152	chr1:488582-488733	4	CTGCAGCTTTTGGCAGTCTATGGTCACACCCTGTCCTCCTCCTACACGTACTCGGATGCTTCCTCCTCAACCTTGGCACCCACCTCCTTCTTACTGGGCCCAGGAGCCTTCAAAGCCCAGGAGTCTGGTCAACGCAGCAGAGCGGGCCCCCT	Exon (ENST00000432723.3/ENST00000432723.3, exon 1 of 2)	1	373182	485208	112027	2	112268260	ENST00000455207.5	-3374	NA	LOC112268260	uncharacterized LOC112268260	0.972134	1	0.817948	0.113079	0.704072	-23.5896	0.667138	0.845217	1.05023	0.106834	0.682531	-2.9177	0.771736	0.884174	0.0844715	0.173516	0.781216	-23.0062
chr1	623953	624146	194	chr1:623953-624146	1	AGGGGCCAACTCTGACTCCCAAGAAGGTGACCTCTATCTCCCTTCCAGGGCCAGAGATGCAACATCACACACACACTGTCTTTGGAATGTGTGATTAAGCTTTTGGCTGCCAGTAGCCTGACAGCTTCCAGCAGCTTTGTCTGCCACCGTGTCCACTTCTCTGTGCCAAAGTCACTGAAACAAAGGGACTGCAG	Intron (ENST00000419394.2/81399, intron 3 of 3)	1	627377	631150	3774	2	101928626	ENST00000452176.2	7004	ENSG00000230021	LOC101928626	uncharacterized LOC101928626	0.375404	0.630215	-1.20455	0.891077	0.951591	0.293521	0.271654	0.726107	-0.68482	0.389683	0.804328	1.58389	0.545054	0.806744	-1.07573	0.589105	0.781216	-1.14234
chr1	723578	723731	154	chr1:723578-723731	3	CCTGCAGCTTTTGGCAGTCTATGGTCACACCCTGTCCTCCTCCTACACATACTCGGATGCTTCCTCCTCAACCTTGGCACCCACCTCCTTCTTACTGGGCCCAGGAGCCTTCAAAGCCCAGGAGTCTGGTCAACGCAGCAGAGCGGGCCCCCTA	Exon (ENST00000440782.3/ENST00000440782.3, exon 1 of 2)	1	601436	720200	118765	2	105378947	ENST00000440200.5	-3378	NA	LOC105378947	proline-rich extensin-like protein EPR1	0.972134	1	0.817948	0.113079	0.704072	-22.7386	0.641273	0.845217	1.69602	0.131414	0.682531	-1.4817	0.716881	0.855845	-0.668821	0.173516	0.781216	-22.5403
chr1	726600	726754	155	chr1:726600-726754	5	GCCTGCAGATGTCATCGGAGGGCCAGGAGCTGAGCCTGGAGAGGCCACCGCGAGGCCTGAGCTGGGCCTGGGGAGCTTGGCTTAGGGAAGTTGTGGGCCTACCAGGGCCGCTGGGAGCTGGGCAGGAGCTGAGTCCAAAGACGTTGTTGGGACCT	Exon (ENST00000506640.3/100288069, exon 16 of 16)	1	711867	732212	20346	2	100288069	ENST00000414688.6	5458	NA	LOC100288069	uncharacterized LOC100288069	0.329114	0.603103	22.3603	0.891077	0.951591	1.96287	0.484642	0.84435	21.3968	0.753887	0.879899	0.962869	0.167938	0.681513	22.3603	0.561579	0.781216	2.83162
chr1	726817	727058	242	chr1:726817-727058	8	CGCCGGGAGGCTGCAAGTGGGTCTGAGAGGCCAACTTGAGGAGGCCTGGCCTCTGCCTCCCGCATTGCCCAGCTGTTCCTCCTGGCTGCATCTCCCACCTCCCAGCAAACAAGCTCTTTTGGCTCAGCTCCCGCCTGCGTTTGTAGACCCCGAAGTTTCTGCAACCAAGCTCTTCAGACCCACATCCCTTCTCCCAGTGACTGAACAGTCCCAGCTCCGGCTGGAGAAGGGCGTCTGCAGAC	Exon (ENST00000506640.3/100288069, exon 16 of 16)	1	711867	732212	20346	2	100288069	ENST00000414688.6	5154	NA	LOC100288069	uncharacterized LOC100288069	0.329114	0.603103	22.3603	0.891077	0.951591	1.96287	0.484642	0.84435	21.3968	0.753887	0.879899	0.962869	0.167938	0.681513	22.3603	0.561579	0.781216	2.83162
chr1	947993	948283	291	chr1:947993-948283	12	GGGGCGCGTTGCCAGCAGTCAGGTTCCACCCCAGTCCCAGGTACCCGGGACAAGGGCACCTCCTACCAGCCTGGGGCAGCCAAGCCCGTTATAAGACAGTCTGAGTCGGCCACGAGCCGGTGTGGGCAGGACACACACCTGCAGGACCACAGGCAGCACCAGCTCCGGGAAGCCGATGCAGTGTGCCTGGCTGTGCAGGTACTCCAGGGTGAGGTCGTACAGCTGCTCCACCAGGCCGTCCTGAAGAGCAGGAGAGAGGGCCGAGTGCATCAGGGAGAGGCTGGGGCTGGG	Promoter (<=1kb)	1	944204	947060	2857	2	26155	ENST00000483767.5	-933	ENSG00000188976	NOC2L	NOC2 like nucleolar associated transcriptional repressor	NA	NA	0	0.389207	0.704072	-24.272	0.306975	0.726107	24.3492	0.717538	0.879899	-1.0666	0.325495	0.704731	-24.3126	0.350384	0.781216	-24.2422
chr1	948357	948584	228	chr1:948357-948584	4	TGGGCCCCAGCCCTGGGAGACCATGAAGGTCCATGCTTGAACTTGGAGGATGCCAGCCCCCTCCCATCCACCTCAGCACCCCCAACCCCACCCTGGGAACTGCCCAGGCCCCTCCCCAGGAGGCCAGCCTCACCCGGTACGCCTTCTCCTGCAGGTTGACATTGGACAGCTTCAGGATCACGGAGAAGTTGATGGGCTTGGAGCTCATGCGCCCTGGCTTCCTGTTGA	Promoter (1-2kb)	1	944204	947060	2857	2	26155	ENST00000483767.5	-1297	ENSG00000188976	NOC2L	NOC2 like nucleolar associated transcriptional repressor	NA	NA	0	0.389207	0.704072	-24.272	0.306975	0.726107	24.3492	0.717538	0.879899	-1.0666	0.325495	0.704731	-24.3126	0.350384	0.781216	-24.2422
chr1	1047865	1048016	152	chr1:1047865-1048016	5	CTGCAGGAGCACGTGCGATTTATGGACTTTGGTGAGCGCCAGGCCACGAGCCACAGCTTACCTGCCCCCTCCTCTGCCCATGCCCCTGCCCCTCACCCCTTCCTGGCCCTGCTCCCAGGAAACCCTAACAGCTCCCTGTGCCGGCAGACTGG	Promoter (<=1kb)	1	1047475	1047838	364	1	375790	ENST00000478677.1	390	ENSG00000188157	AGRN	agrin	0.353872	0.603103	-24.1018	0.292615	0.704072	23.6594	0.65379	0.845217	-1.47987	0.27781	0.682531	23.9825	0.325495	0.704731	-23.9085	0.596098	0.781216	0.557608
chr1	1048175	1048383	209	chr1:1048175-1048383	12	CACCACACGTCGGCCCCCCACCACTGCCCCCAGCCGTGTGCCCGGACGTCGGCCCCCGGCCCCCCAGCAGCCTCCAAAGCCCTGTGACTCACAGCCCTGCTTCCACGGGGGGACCTGCCAGGACTGGGCATTGGGCGGGGGCTTCACCTGCAGCTGCCCGGCAGGCAGGGGAGGCGCCGTCTGTGAGAAGGGTAAGGATGTCCACTGCA	Promoter (<=1kb)	1	1048529	1049394	866	1	375790	ENST00000492947.1	-146	ENSG00000188157	AGRN	agrin	0.353872	0.603103	-24.1018	0.292615	0.704072	23.6594	0.65379	0.845217	-1.47987	0.27781	0.682531	23.9825	0.325495	0.704731	-23.9085	0.596098	0.781216	0.557608
chr1	1053509	1053712	204	chr1:1053509-1053712	6	CAGTGCCTGCAGACCCCTGGCTGGCCCATCTGTCCTCCCGCCCGTCTCTCTGATCTCTCTCTGCCAGGCTGCCCCTGTCTCCATCCCTCTTCTCCCTCCCACTGTCGGTGTCTGCCCACCAGCCACCCCTGGGTCCCGTCACAGCCCTTGTGGCCTCCGCAGCTGGGGCCCTTGTCCTCCCGCCTCCCCCACCCTGTCCTGTTG	Promoter (1-2kb)	1	1055033	1056116	1084	1	375790	ENST00000418300.1	-1321	ENSG00000188157	AGRN	agrin	0.0619553	0.603103	-1.44725	0.0359253	0.704072	-2.10547	0.00785021	0.726107	-1.6695	0.00915639	0.576841	-2.25517	0.369927	0.775294	-0.821634	0.174246	0.781216	-1.44351
chr1	1053712	1053915	204	chr1:1053712-1053915	6	GCCACCTTCCTAGAGGCCCTGACCTGCCCTCTGCCCTCCAGCGAGAAGGCACTGCAGAGCAACCACTTTGAACTGAGCCTGCGCACTGAGGCCACGCAGGGGCTGGTGCTCTGGAGTGGCAAGGCCACGGAGCGGGCAGACTATGTGGCACTGGCCATTGTGGACGGGCACCTGCAACTGAGCTACAACCTGGGCTCCCAGCCC	Promoter (1-2kb)	1	1055033	1056116	1084	1	375790	ENST00000418300.1	-1118	ENSG00000188157	AGRN	agrin	0.0619553	0.603103	-1.44725	0.120858	0.704072	-1.11379	0.00785021	0.726107	-1.6695	0.0250685	0.576841	-1.62449	0.369927	0.775294	-0.821634	0.430637	0.781216	-0.451826
chr1	1149371	1149523	153	chr1:1149371-1149523	4	GAGGGAGGGGCTGGGGCGAGTCACCCCAAACAGGAGGCCTTGCGGAGAGGAATAGACAGGGCCAAACACCCCGGAAATTCAGGCAGGTGGGTGAGGAGGCTGGGACACAAGCTGCGGGGCCTGGAAGCTGAAGGTGGGGACAACTGCAGACCC	Distal Intergenic	1	1137017	1144056	7040	1	254099	ENST00000416774.1	12354	ENSG00000223823	LINC01342	long intergenic non-protein coding RNA 1342	0.329114	0.603103	25.0828	0.497092	0.783633	0.0891589	0.306975	0.726107	24.5952	0.920918	0.940684	-0.910841	0.614107	0.806744	2.35541	0.197631	0.781216	0.957914
chr1	1149523	1149675	153	chr1:1149523-1149675	8	CCTCCCCAGCCCGAGGGGAGGAGGTGGCTGAGTGGCTGGGGTGGGTTTGCTGGAGGGCTGAGGGTCCGCGGGCCCGCCCCGTGGTGGGAAGGGGCAGAGGAGGGCAGGTCCCGTGGTGGGAAGGGGCGTGGTGGGAAGGGGCGCCCCATGGTG	Distal Intergenic	1	1137017	1144056	7040	1	254099	ENST00000416774.1	12506	ENSG00000223823	LINC01342	long intergenic non-protein coding RNA 1342	0.329114	0.603103	25.2754	0.497092	0.783633	0.1862	0.306975	0.726107	24.9093	0.920918	0.940684	-0.8138	0.614107	0.806744	1.96309	0.197631	0.781216	1.05496
chr1	1149675	1149827	153	chr1:1149675-1149827	6	GGGAAGGGGCGTGGTGGGAAGGGGCAGAGGAGGGCAGGTCCCGTGGGTCGAACGCCAGTGTCCTGGGAGTCTGGGGGTTCCTGCAGGTGACACAGATGTGGGGTTGGGACGTCAGGAGGTTGGTTTTGGGGATGCAGCAGTCGGAGGCTATGA	Distal Intergenic	1	1137017	1144056	7040	1	254099	ENST00000416774.1	12658	ENSG00000223823	LINC01342	long intergenic non-protein coding RNA 1342	0.329114	0.603103	25.2754	0.497092	0.783633	0.1862	0.306975	0.726107	24.9093	0.920918	0.940684	-0.8138	0.614107	0.806744	1.96309	0.197631	0.781216	1.05496
chr1	1286922	1287087	166	chr1:1286922-1287087	8	CGTCTGCAGAGGCTGAGCCACTCGGGCAGCCGGGTCAGAGTGGGGTTCAGACTGGTGAGTGTCCCAGCCGGGGCCTGCAGCCATCAGGGCCTTGAGCTGGGAGCACGGCCCTGCGCTGCTGGTACCTCGAGTGGGGAGCGGGGCCTGGGCTGTAGCCACAGAGCTG	Promoter (<=1kb)	1	1287109	1290943	3835	1	6339	ENST00000379099.3	-22	ENSG00000162572	SCNN1D	sodium channel epithelial 1 subunit delta	0.329114	0.603103	24.7348	0.945411	0.951591	0.225724	0.484642	0.84435	23.7714	0.717538	0.879899	-0.774276	0.167938	0.681513	24.7348	0.596098	0.781216	1.09448
chr1	1287087	1287252	166	chr1:1287087-1287252	11	GACCCTCCCTCCCCTCTCCCAGTGCAACAGCACGGGCGGCGACTGCTTTTACCGAGGCTACACGTCAGGCGTGGCGGCTGTCCAGGACTGGTACCACTTCCACTATGTGGATATCCTGGCCCTGCTGCCCGCGGCATGGGAGGACAGCCACGGGAGCCAGGACGGC	Promoter (<=1kb)	1	1287109	1290943	3835	1	6339	ENST00000379099.3	0	ENSG00000162572	SCNN1D	sodium channel epithelial 1 subunit delta	0.329114	0.603103	24.7348	0.945411	0.951591	0.225724	0.484642	0.84435	23.7714	0.717538	0.879899	-0.774276	0.167938	0.681513	24.7348	0.596098	0.781216	1.09448
chr1	1287252	1287417	166	chr1:1287252-1287417	9	CCACTTCGTCCTCTCCTGCAGTTACGATGGCCTGGACTGCCAGGCCCGGTGAGTGTGGCGGGCGGGGGCCACTCCTTCCGTCCCACCCCACAGAGCGTGGCCGCACCCCTGGGGTCCCTCTGGCTGTATGCTGGGAGCCACCCAAGGCTGGCCGGAGGAACTTTCC	Promoter (<=1kb)	1	1287109	1290943	3835	1	6339	ENST00000379099.3	143	ENSG00000162572	SCNN1D	sodium channel epithelial 1 subunit delta	0.329114	0.603103	24.7348	0.945411	0.951591	-0.122199	0.484642	0.84435	23.7714	0.717538	0.879899	-1.1222	0.167938	0.681513	24.7348	0.596098	0.781216	0.746556
chr1	1291463	1291625	163	chr1:1291463-1291625	8	GATGCCCCCGCCTGCAGGCGGCACGTCAGATGACCCGGAGCCCAGCGGGCCTCATCTCCCACGGGTGATGCTTCCAGGGGTTCTGGCGGGAGTCTCAGCCGAAGAGAGCTGGGCTGGGCCCCAGCCCCTTGAGACTCTGGACACCTGAACCAGACCTGCCAGG	3' UTR	1	1294499	1295008	510	2	116983	ENST00000470659.1	3383	ENSG00000131584	ACAP3	ArfGAP with coiled-coil, ankyrin repeat and PH domains 3	0.152084	0.603103	24.9197	0.205257	0.704072	-24.7181	0.306975	0.726107	23.9562	0.070489	0.576841	-24.7181	0.0464076	0.476039	24.9197	0.350384	0.781216	-23.8493
chr1	1339674	1339845	172	chr1:1339674-1339845	9	AAGGCCCCCATGGTCCCACCTCCCTGCCTGGCCCCTCCCGCTCCAGCGCCCCCAGCCCTCACCCCGTCTGGGAAACGATCTCCCGCAGCACCCGCACGGCATCGTCATTGCTCATGTTCTCAAAGTTCACGTCATTCACCTGCAGGGGTGGGGATTAGGGTGGTGCAGGCAG	Promoter (<=1kb)	1	1339650	1339708	59	2	102466740	ENST00000616525.1	0	ENSG00000284372	MIR6808	microRNA 6808	0.329114	0.603103	23.8987	0.891077	0.951591	1.33841	0.306975	0.726107	23.4996	0.753887	0.879899	0.338415	0.614107	0.806744	2.06278	0.561579	0.781216	2.20717
chr1	1419122	1419421	300	chr1:1419122-1419421	16	TCACACTCCTTCTCCCCCCCTCCAAGTTCAGGCAGCGCCTGGGGCAGGTCCCCCTCAGGCATCTGGGCCACCTCGGCCCACTGCGTCCGCAGAGTGGGGCTGGCCCCTCGGCTCAGCAGAAGCCCCACGGTAGGCCCATGCCCTCGCTCTGCAGCCAGGTGTAGGGGGGTCTTTCGGAGCCAGCCGGTAGCATCCACCTGGGCACCCCTGTCCAGCAGGCAGCCGGCAACCTCCACGTGGCCTTCCCGAGAGGCGTGATGCAGGGGTGTGAGGCCCAGGGTGTCCCGCGCATCCACCTCG	Promoter (<=1kb)	1	1420245	1422691	2447	1	105378585	ENST00000428932.1	-824	NA	LOC105378585	uncharacterized LOC105378585	1	1	-1.42275	0.389207	0.704072	-23.3957	0.65379	0.845217	-2.38623	0.753887	0.879899	0.768776	0.649975	0.806744	-0.493142	0.350384	0.781216	-24.4586
chr1	1441392	1441563	172	chr1:1441392-1441563	2	GAGACACAGTAGGCCCCCCTGCCTGTGTGTGCAGGGGGTGTCTGTGGGGGGGCCCTGCTGGCTGGACTTTGGGTTTCTCCTGAGCTCCCCTTAGCCCCCAAGTCAGGCCACGGAGGCCTGAGTAGGACCCATGGGCTGTGTGTGTCACTGCAGGTGGCGTGCTCACAACTGC	3' UTR	1	1435735	1437177	1443	1	64856	ENST00000471398.1	5657	ENSG00000179403	VWA1	von Willebrand factor A domain containing 1	0.329114	0.603103	24.5973	0.389207	0.704072	-24.3957	0.306975	0.726107	24.3363	0.717538	0.879899	-1.39729	0.614107	0.806744	1.67293	0.350384	0.781216	-24.2294
chr1	1441563	1441734	172	chr1:1441563-1441734	7	CACTGCTGGTCGGCAGGTGGCCAGGGTTGCAGGCCCGGGCCTCGGGCCCCACCTCCTCTGGAGGGGTAGGATCTCCTTCGTGCAGCCCCTGCCCCCTACCCTGTTCTCCGGAGTGTTGGCAGATCTGAGCCCACGGTCACGTGAGAGGAGATGCCTCTTGCACACTGAGCCC	3' UTR	1	1435735	1437177	1443	1	64856	ENST00000471398.1	5828	ENSG00000179403	VWA1	von Willebrand factor A domain containing 1	0.329114	0.603103	24.8604	0.389207	0.704072	-24.6587	0.306975	0.726107	24.5035	0.717538	0.879899	-1.66033	0.614107	0.806744	1.93596	0.350384	0.781216	-24.3966
chr1	1441734	1441905	172	chr1:1441734-1441905	5	CAGGCCCAGCTCACGGAGCACCCTGCAGGTGGCAGCGGGGCACCAGGGGCTCATTCCTGGTGGCCTCAGTGGCTTCTGTGGACGACTCAGACTCACATGAGAAGCTGGGAGGAGCTCCAGCTCTGCAATCCCGAGAGGGCAGAGCGGGGGCCCTGGCCACAACCCTGCTCCC	3' UTR	1	1435735	1437177	1443	1	64856	ENST00000471398.1	5999	ENSG00000179403	VWA1	von Willebrand factor A domain containing 1	0.329114	0.603103	24.8604	0.389207	0.704072	-24.6587	0.306975	0.726107	24.5035	0.717538	0.879899	-1.66033	0.614107	0.806744	1.93596	0.350384	0.781216	-24.3966
chr1	1450729	1450868	140	chr1:1450729-1450868	7	CTGCAGTTGGAGCAACAGTCCAAGCTCAAAGTGAGTGGGGCCGGTGTGGGCGGGGAGGCCGGGGCACACATGGGGTTCGGGCGTGGAGATTGGTAGGGCTACTGCCGGTGGGTAGGGCCGGGGGTGTGTACATGGGCAGC	Promoter (<=1kb)	1	1449914	1455902	5989	1	219293	ENST00000475091.2	815	ENSG00000215915	ATAD3C	ATPase family AAA domain containing 3C	1	1	-0.373038	0.205257	0.704072	-24.9227	0.795906	0.927284	-0.471418	0.925237	0.94116	-0.136594	0.806188	0.91333	-0.125181	0.123911	0.781216	-25.3776
chr1	1478637	1478790	154	chr1:1478637-1478790	14	TCTGCAGGAGTATGAGGCCGCCGTGGAGCAGCTCAAGAGCGAGCAGATCCGGGCGCAGGCTGAGGAGAGGAGGAAGACCCTGAGCGAGGAGACCCGGCAGCACCAGGCCGTAAGAGCGCAAGAGGCCGCGAGGGAGGCCGCCCGGCTGCGGGGA	Promoter (<=1kb)	1	1479049	1482662	3614	1	83858	ENST00000378736.3	-259	ENSG00000160072	ATAD3B	ATPase family AAA domain containing 3B	0.972134	1	1.59227	0.205257	0.704072	-25.2053	0.690137	0.845217	0.628801	0.070489	0.576841	-25.2053	0.614107	0.806744	2.52189	0.350384	0.781216	-24.3365
chr1	1478852	1479008	157	chr1:1478852-1479008	15	GAGCTGCCCTCGGAACGGCCTTGCACAAACGCCTAAGACCTGTAAGGTCCCTCACTGCTGAGCCGGACGGGAGGTCCCCGCGCCTCCCCACGTTTGTGTGAGGCTGATGGCGCGTCGGAGTCCCCGGCGCTCCGCCCAGTCGGCCCAGACTGCAGCT	Promoter (<=1kb)	1	1479049	1482662	3614	1	83858	ENST00000378736.3	-41	ENSG00000160072	ATAD3B	ATPase family AAA domain containing 3B	0.972134	1	1.59227	0.205257	0.704072	-25.2053	0.690137	0.845217	0.628801	0.070489	0.576841	-25.2053	0.614107	0.806744	2.52189	0.350384	0.781216	-24.3365
chr1	1517304	1517457	154	chr1:1517304-1517457	14	TCTGCAGGAGTATGAGGCCGCCGTGGAGCAGCTCAAGAGCGAGCAGATCCGGGCGCAGGCTGAGGAGAGGAGGAAGACCCTGAGCGAGGAGACCCGGCAGCACCAGGCCGTAAGAGCGCAAGAGGCCGCGAGGGAGGCCGCCCGGCTGCGGGGA	Promoter (<=1kb)	1	1517621	1522780	5160	1	55210	ENST00000429957.1	-164	ENSG00000197785	ATAD3A	ATPase family AAA domain containing 3A	0.972134	1	1.25441	0.205257	0.704072	-25.1849	0.690137	0.845217	0.290931	0.070489	0.576841	-25.1849	0.614107	0.806744	2.18402	0.350384	0.781216	-24.3162
chr1	1517519	1517675	157	chr1:1517519-1517675	15	GAGCTGCCCTCGGAACGGCCTTGCACAAACGCCTAAGACCTGTAAGGTCCCTCACTGCTGAGCCGGACGGGAGGTCCCCGCGCCTCCCCACGTTTGTGTGAGGCTGATGGCGCGTCGGAGTCCCCGGCGCTCCGCCCAGTCGGCCCAGACTGCAGCT	Promoter (<=1kb)	1	1517621	1522780	5160	1	55210	ENST00000429957.1	0	ENSG00000197785	ATAD3A	ATPase family AAA domain containing 3A	0.972134	1	1.25441	0.205257	0.704072	-25.1849	0.690137	0.845217	0.290931	0.070489	0.576841	-25.1849	0.614107	0.806744	2.18402	0.350384	0.781216	-24.3162
chr1	1599422	1599583	162	chr1:1599422-1599583	23	CAGCATGACGCAGATGGAGCCGCCCACCGCCGTCATGGCCACCACGATGTCCTGCATGCCGGCCGGCTCGGCGGTGAACTCCACGCACTCGGCCGGCTCGGGGGTCTCTGGCGCGGCGGCGGCGGGCCCAGCGCGCAGCGGCAGCGGCTGCAGGCACAGGCG	Promoter (<=1kb)	1	1598012	1600135	2124	2	643988	ENST00000422725.4	552	ENSG00000228594	FNDC10	fibronectin type III domain containing 10	0.329114	0.603103	24.0972	0.497092	0.783633	0.237168	0.136921	0.726107	24.5765	0.639663	0.879899	0.056698	0.771736	0.884174	0.218936	0.435213	0.781216	0.302938
chr1	1599583	1599744	162	chr1:1599583-1599744	29	GGTAGAGGACGCTGTCGTGCACGTCGGGCAGCAGGTAGTCGCGGCAGGAGGCCCCGAGGAGCACGCGCTCGCACGGGAAGCGCGTGTAGGCGCCGCGCCACGAGCAGTTGAGCGCGAAGGCGCGCACGCGGCGCGCGGCGGCCGGGGCCAGGCGCCACTGCA	Promoter (<=1kb)	1	1598012	1600135	2124	2	643988	ENST00000422725.4	391	ENSG00000228594	FNDC10	fibronectin type III domain containing 10	0.329114	0.603103	24.0972	0.497092	0.783633	0.237168	0.136921	0.726107	24.5765	0.639663	0.879899	0.056698	0.771736	0.884174	0.218936	0.435213	0.781216	0.302938
chr1	2009140	2009367	228	chr1:2009140-2009367	7	TGGTGGCATGTGCCTGTAGTCTCAGCTACTCCTGAGGCTGAGGCAGGAGGGTCGCTTGAGCTCCGGAGGTCAAGGCTGCAGTGAGCTGTGATCATGCCACTGCATTGCAGCCGAGCAACAGAGCGAGACCCTGCCTCTAAAAATAAAATAAAACCCTCACCGGCCACCTTTGGAGGGTGCTGGATACTAAGTTACCATTCCGAAATGTTGTGGCAGCCTTAGGGGCGC	Distal Intergenic	1	1983671	2003837	20167	2	85452	ENST00000378592.1	-5303	ENSG00000142609	CFAP74	cilia and flagella associated protein 74	0.173089	0.603103	-25.5728	0.389207	0.704072	-24.8568	0.0550356	0.726107	-25.5728	0.717538	0.879899	-1.72496	0.325495	0.704731	-24.6432	0.350384	0.781216	-24.5728
chr1	2009429	2009719	291	chr1:2009429-2009719	11	AGCTTTCAGCCGTGCCGCAGGGACCGGCAACAGCGTTTGAGCAGAGCACACTCTCTGGGTGGCCCCTGGCCCATGACTGAGCACGCAGGGGCACTGGGCAGCCCTGGCCCCTGAGACGGGACTCCTGGTGGACACTGGGCATTCTCTGCTGCAGAGCCCTGCCATGCCCCTCCACTGGGTTGGCCAAAATGTTGAGAGATTTGCATTGCGGTCGGGCTCTCCCAGCCCGATTCTGTTTCCTCCCAATTTTCTTTCACAGACGTTGGACGGGTATTGTGGCCTGAAGGCTTT	Distal Intergenic	1	1983671	2003837	20167	2	85452	ENST00000378592.1	-5592	ENSG00000142609	CFAP74	cilia and flagella associated protein 74	0.173089	0.603103	-25.5728	0.389207	0.704072	-24.8568	0.0550356	0.726107	-25.5728	0.717538	0.879899	-1.72496	0.325495	0.704731	-24.6432	0.350384	0.781216	-24.5728
chr1	2073988	2074134	147	chr1:2073988-2074134	14	GCTGCAGGCCCTGTGCGTGCGGAGGACGGTGCCCGAGTCAGCATTTTGGGTCTGAGTCCCGGCGTTGCCGCTGCCTGTGCGCTGCACAGATGCTCCGGGCAGCAACACGGCTGGTGCCACGGCCCGGGGAAGGCGTGCGGCTGCAGC	Promoter (<=1kb)	1	2073986	2185190	111205	1	5590	ENST00000461106.6	2	ENSG00000067606	PRKCZ	protein kinase C zeta	0.353872	0.603103	-21.0806	0.292615	0.704072	20.9516	0.184235	0.726107	-21.0806	0.27781	0.682531	21.0947	0.501742	0.806744	-20.151	0.596098	0.781216	0.870991
chr1	2074134	2074280	147	chr1:2074134-2074280	5	CAGCTCCCAGCAATGTCAGGGGAAACGCAGTGAGAGGCTGTTGTTTTGCGGGTGACAGATTTTTAGAAAAATAAGGCTGTGGAGGGACCTTCTGAGCGAGGCAGGGGCTGCTGGAGGGACATGCTCACCCCGAGGACGGATGGTGTG	Promoter (<=1kb)	1	2073986	2185190	111205	1	5590	ENST00000461106.6	148	ENSG00000067606	PRKCZ	protein kinase C zeta	0.353872	0.603103	-21.0806	0.292615	0.704072	20.9516	0.184235	0.726107	-21.0806	0.27781	0.682531	21.0947	0.501742	0.806744	-20.151	0.596098	0.781216	0.870991
chr1	2119680	2119867	188	chr1:2119680-2119867	2	CTGCAGGACGGCGCTTACATGGAGACCAGCTTCCTTCTGCCTGAAGTAGTCCCTTTAGTATTCCTTTCAGCACAGACTTGTAATTAATTCTTTTTATTTCTTTTCTTTTCTTTTTTTTTTTTTTGAGATGGATTTTTGCTCTTGTTGCCCAGGCTGGAGTGCAGTGGTGTGATTTTGGCTCACTGCAG	Intron (ENST00000378567.8/5590, intron 4 of 17)	1	2116205	2150897	34693	1	5590	ENST00000470511.5	3475	ENSG00000067606	PRKCZ	protein kinase C zeta	0.0150424	0.603103	3.42562	0.376163	0.704072	-0.217219	0.0457122	0.726107	2.8797	0.571338	0.879899	-0.373117	0.0151707	0.476039	2.20628	0.358787	0.781216	0.00533074
chr1	2143877	2144029	153	chr1:2143877-2144029	3	GCTGCAGCCCCCCAGCCCCTGCAAGCCACGGGGCCTTGCCTGAAGCAGCACCTCGTCACCCCTGCCCGATGGCACCTCCCCTGTGTCCCCTCATGCAGAGCAGGGTTCCAGGCCTCTCCTTGGGGCCACTGGTTCCCCCAACCTTGGGATAGA	Promoter (<=1kb)	1	2144451	2185395	40945	1	5590	ENST00000479263.5	-422	ENSG00000067606	PRKCZ	protein kinase C zeta	0.329114	0.603103	25.1823	0.389207	0.704072	-24.9807	0.484642	0.84435	24.2188	0.210736	0.682531	-24.9807	0.167938	0.681513	25.1823	0.523999	0.781216	-24.1119
chr1	2144056	2144198	143	chr1:2144056-2144198	6	CAAGCCTGGCGCCCGGAAGGGACAAGGTGCCGGGGCCACCTGTTGCCCGGCTCAGTGTCCTCTTTTGAGAAGGTATAGGTGTGGAAGGCCCTGCCTGTCCTCTCCGCTGGCCCCTCAGTGTGGCCTGGGCCTGACGCTCTGTT	Promoter (<=1kb)	1	2144451	2185395	40945	1	5590	ENST00000479263.5	-253	ENSG00000067606	PRKCZ	protein kinase C zeta	0.329114	0.603103	25.1823	0.389207	0.704072	-24.9807	0.484642	0.84435	24.2188	0.210736	0.682531	-24.9807	0.167938	0.681513	25.1823	0.523999	0.781216	-24.1119
chr1	2144198	2144340	143	chr1:2144198-2144340	9	TCCCACCTGCAGAGAGCGTACTGCGGTCAGTGCAGCGAGAGGATATGGGGCCTCGCGAGGCAAGGCTACAGGTGCATCAACTGCAAACTGCTGGTCCATAAGCGCTGCCACGGCCTCGTCCCGCTGACCTGCAGGAAGCATAT	Promoter (<=1kb)	1	2144451	2185395	40945	1	5590	ENST00000479263.5	-111	ENSG00000067606	PRKCZ	protein kinase C zeta	0.329114	0.603103	24.2754	0.389207	0.704072	-24.0738	0.484642	0.84435	23.3119	0.210736	0.682531	-24.0738	0.167938	0.681513	24.2754	0.523999	0.781216	-23.205
chr1	2153834	2154128	295	chr1:2153834-2154128	7	GAGCCTGATTGCAGGAGTTGTTGAATGCTTGGATGGTTTCTAGAAATTTCTTTCTCCCCACAAAAAGACTGCACTCTCTGGGGCCAGGCTTGCCTCTTGTTCCCCCAGGAGTCACTGGCAAGCCCCTTCCCACCGATTCTGCAGCGCCAGCCCCACGCAGGGCCTTGAACTCAGCAGTGCTGTGTCCAGGAGGTTCCACTCAGTTTGGGTGCTGAGTGATATGTGGGTCATGATGCCAACGCCGACGTCCCTGCGGGGCCACAGTGGGTGGGTGCTGCTGGTGAGGGCCACTGGG	Intron (ENST00000378567.8/5590, intron 9 of 17)	1	2145387	2185116	39730	1	5590	ENST00000478770.6	8447	ENSG00000067606	PRKCZ	protein kinase C zeta	0.0733743	0.603103	25.9587	0.945411	0.951591	-0.686027	0.203351	0.726107	24.9953	0.920918	0.940684	-0.533885	0.0134976	0.476039	25.9587	0.983422	0.987893	-0.520087
chr1	2154145	2154296	152	chr1:2154145-2154296	9	GTGAGGGGTGGAGGAGTCACCGCCGACCCACTAGGTCTTCAGCCACTGGAGATGGGAGGAGATGCGGGCTGGCGAGGAGCTCGGCTTGTGGCCTGGGGTGGCGTGAGATACCCGGGTGCACATGTTGAGCAGCCGTCGGGGGGCAGGTCTGC	Intron (ENST00000378567.8/5590, intron 9 of 17)	1	2145387	2185116	39730	1	5590	ENST00000478770.6	8758	ENSG00000067606	PRKCZ	protein kinase C zeta	0.0733743	0.603103	25.9587	0.945411	0.951591	-0.686027	0.203351	0.726107	24.9953	0.920918	0.940684	-0.533885	0.0134976	0.476039	25.9587	0.983422	0.987893	-0.520087
chr1	2154296	2154447	152	chr1:2154296-2154447	8	CAGCTCAGGGAGAGGCCGGGCTGGGAGCTCTCGGCGTGGAAAGATGAGACTCGAAGCCACTCCATTGGATCTGCCTCCGAAGAGAAGGGAGGGTGGCCGAGGACCAAGCCTCGAGGAGGAGGAGGGCGCTGAGGAGGAATGACACAGTCTCA	Intron (ENST00000378567.8/5590, intron 9 of 17)	1	2145387	2185116	39730	1	5590	ENST00000478770.6	8909	ENSG00000067606	PRKCZ	protein kinase C zeta	0.0733743	0.603103	25.2475	0.891077	0.951591	1.89894	0.203351	0.726107	24.284	0.858173	0.940684	2.05108	0.0134976	0.476039	25.2475	0.950293	0.986213	0.514891
chr1	2476966	2477128	163	chr1:2476966-2477128	4	AGGGGGCGAGGGGGGATCTCAGGTGGCTCCAATGCTCTCATTGAAGGGGTGCCTTGTGCTCTGGGGGTCAGTGGTGCTTGCAGCCCAGGCGGCTGGGCTGGCATCCTGGTGCCGGACATGAGGGCCTTTGCCGTTAGGAGACTCTGCAGAGGAGACTGGCTGG	Promoter (<=1kb)	1	2476315	2505525	29211	1	9651	ENST00000419816.6	651	ENSG00000149527	PLCH2	phospholipase C eta 2	0.152084	0.603103	24.6819	0.205257	0.704072	-24.4803	0.203351	0.726107	24.4151	0.301844	0.682531	-1.41237	0.22065	0.681513	1.688	0.244564	0.781216	-24.3081
chr1	2477128	2477290	163	chr1:2477128-2477290	4	GGTATGGCTGGGAGGGTGGAGTGTGTGTCTTGTGGTGGCCTGTGGAGGGCCCCGGTCCGGGCTGGCCTGCCAGCTCTCTGTTCCAGCGGCAGACAGGGTCCTGTCCAGGCTGCCCTGTTGCAGGCCTCTGCCCGCCCCCTGCCCCTGTGTCCTGCCTCACCCC	Promoter (<=1kb)	1	2476315	2505525	29211	1	9651	ENST00000419816.6	813	ENSG00000149527	PLCH2	phospholipase C eta 2	0.152084	0.603103	24.9312	0.205257	0.704072	-24.7295	0.203351	0.726107	24.7152	0.301844	0.682531	-1.28313	0.22065	0.681513	1.55877	0.244564	0.781216	-24.6083
chr1	2477290	2477452	163	chr1:2477290-2477452	5	CTCTCCTAAATCCCTGCAGCCATACCTGCGTCTTCACCTCCCATGTGCCCCGGAGAGCCCAGCCCCCCATGCCATGGCTTCCATCCCTTCAATTCCCCTCTGCTCGTGATCACGTAGTAGCTTCCCCAAGAAGGCCCGGCCAGTACTGCCCTTGGTCCTCTAC	Promoter (<=1kb)	1	2476315	2505525	29211	1	9651	ENST00000419816.6	975	ENSG00000149527	PLCH2	phospholipase C eta 2	0.152084	0.603103	24.9312	0.205257	0.704072	-24.7295	0.203351	0.726107	24.7152	0.301844	0.682531	-1.28313	0.22065	0.681513	1.55877	0.244564	0.781216	-24.6083
chr1	2768523	2768673	151	chr1:2768523-2768673	1	GGAACAGCACCCCACAACTGCAGGTGAGCATCTGATAGCCTGGATAGGCACTCCACACAGCCAGGTGAGCAGCTGAAAGCCTGGAATGGTACCCCACATGCAGGTGAGCATCCGACAGCCTGGAACAGCAGCTCACATCCCCAGGTAAGAT	Promoter (<=1kb)	1	2768091	2784733	16643	1	105378598	ENST00000648684.1	432	NA	LOC105378598	uncharacterized LOC105378598	0.310392	0.603103	-0.762485	0.459659	0.75726	-0.654243	0.327631	0.763231	-0.685892	0.124795	0.682531	-1.26165	0.418358	0.806744	-0.504647	0.971096	0.987893	-0.00478112
chr1	2768673	2768823	151	chr1:2768673-2768823	0	TTCCAACAGCATGGAACAAGACCACTGCCCCCAGGTGAGCATCTGGCAGCCTGGAAAAACAACCCCCTTCAGGTGAGCATCTGACAGCCTGGAACAGCACCCTCCACCTTCAGGTGAGAATATGACAGCCTGAAACAGCACCCCACACCCC	Promoter (<=1kb)	1	2768091	2784733	16643	1	105378598	ENST00000648684.1	582	NA	LOC105378598	uncharacterized LOC105378598	0.310392	0.603103	-0.762485	0.459659	0.75726	-0.654243	0.327631	0.763231	-0.685892	0.124795	0.682531	-1.26165	0.418358	0.806744	-0.504647	0.971096	0.987893	-0.00478112
chr1	2783648	2783835	188	chr1:2783648-2783835	8	ACACAGTGCCTGCACGTTCCCCGGCTCAGCCCGCAGCACTGTGTTGAAGTCGAACATGGCCGTCTTCTTCTGGCCCAGGAACCCATAGCAGCGGGCTCGGGCAAGGAGGGACTCACTTGCCTGGCTTCCTGCAGGAAGACGGCATGGGGTCAGGATGAGCCTATGCTGGGTCCCTTCCCCAGCATCTA	Exon (ENST00000401095.9/100287898, exon 6 of 9)	1	2641368	2789665	148298	2	100287898	ENST00000637179.1	5830	ENSG00000215912	TTC34	tetratricopeptide repeat domain 34	0.173089	0.603103	-25.2629	0.945411	0.951591	0.246149	0.0550356	0.726107	-25.2629	0.717538	0.879899	-0.753851	0.325495	0.704731	-24.3333	0.596098	0.781216	1.1149
chr1	3278882	3279032	151	chr1:3278882-3279032	14	CTGCAGACACTCAGCGAGCCGTGGCCTCTCCCATCCTCCCACGCTTCCCTCCGGCCGGCCCTGGAGATCCGTGGAGCCACACGGTGCCGAGCGCGGCGCTGGCCGTGTGCTCCGTGTCTGTCATCGTCAGCCCTGTCCACCTTTGGGGCAG	Intron (ENST00000511072.5/63976, intron 3 of 15)	1	3244132	3386918	142787	1	63976	ENST00000463591.1	34750	ENSG00000142611	PRDM16	PR/SET domain 16	1	1	0.0483017	0.945411	0.951591	0.253547	0.65379	0.845217	-0.915172	0.717538	0.879899	-0.746453	0.649975	0.806744	0.977912	0.596098	0.781216	1.1223
chr1	3279097	3279276	180	chr1:3279097-3279276	10	AAGCTGCCACCAATAGCCACGTGGGCAGCTGTGGCCCCGAGTCCGGGGATGCAGTTGGTCATCAGGAGCCTCGAAGCGTCGCTCACCATGCCTGGAAAGACCGGCGGCCTCTCCTGCCCAGGCGCAGGCCCTCGGCTCAGCAGAAGCCCTGCAGAAGCTGGAGCAGGAGGCATCCCTGGG	Intron (ENST00000511072.5/63976, intron 3 of 15)	1	3244132	3386918	142787	1	63976	ENST00000463591.1	34965	ENSG00000142611	PRDM16	PR/SET domain 16	1	1	0.0483017	0.945411	0.951591	0.253547	0.65379	0.845217	-0.915172	0.717538	0.879899	-0.746453	0.649975	0.806744	0.977912	0.596098	0.781216	1.1223
chr1	3549095	3549394	300	chr1:3549095-3549394	10	TCCCCGTGGCTCCGCGCTGGGTGATCTGTCCCCAGCCAGACCATGCAAGCTCTGGTGGGGACTGGCCCCCCTAGTCTCGGGGCCCCCGTGCTCAGCCCAGAACAAGCCCACAAGGGCCGCAGGAGACCCTTGGTGAATGCTCAAGAAGCTGCAGGTGGACCGGCCACCAGGAGAAAAGCCAGAGCCCGACAAGGCAGCTGGGGCTCCCCCAACCCCTCAGGCTTGGGCTGGAACTCTGGGCACCACGCAGACTGATGCCCCATGGCCACAGGCAGACCAGGGCCCAGGACGGAGAAGTTC	Intron (ENST00000356575.9/1953, intron 4 of 36)	1	3560695	3560790	96	2	693135	ENST00000385042.1	11396	ENSG00000207776	MIR551A	microRNA 551a	0.353872	0.603103	-24.8169	0.389207	0.704072	-24.6856	0.65379	0.845217	-1.98614	0.717538	0.879899	-1.81742	0.325495	0.704731	-24.4419	0.350384	0.781216	-24.3715
chr1	3649820	3649972	153	chr1:3649820-3649972	13	ACCTGCAGGATCCCCAAGCTGCCTCCACCCACGCGGCCGCCCCCGGCCCTGCCCGCCGGGGACGCTGGCACCGAGGATGTCCTGCCCGTGGCCCAGGTCCCCGCCGCTCACCAGGTACTTGCCGTCCGGGGAGAACTTGCAGAGTAAGCTGGA	Promoter (<=1kb)	1	3632213	3650026	17814	2	49856	ENST00000424367.5	54	ENSG00000116213	WRAP73	WD repeat containing, antisense to TP73	0.329114	0.603103	24.3603	0.389207	0.704072	-24.1586	0.484642	0.84435	23.3968	0.210736	0.682531	-24.1586	0.167938	0.681513	24.3603	0.523999	0.781216	-23.2899
chr1	3649972	3650124	153	chr1:3649972-3650124	18	AGAGCTTGAATACCTCGGAGAAGTTCATGGCCGCCGCCTGCCGCGGGCGCCACCCTGCGCCCGAAAACCCGCGGGACCCCTGGGCGCGCAGCAGGCTGCAACAGCCGACGCCGGCCTCCGAGGCCGGAAGTCAGAAGGCGGAAGTGAACTGCA	Promoter (<=1kb)	1	3630767	3650058	19292	2	49856	ENST00000378322.7	0	ENSG00000116213	WRAP73	WD repeat containing, antisense to TP73	0.329114	0.603103	24.3603	0.389207	0.704072	-24.1586	0.484642	0.84435	23.3968	0.210736	0.682531	-24.1586	0.167938	0.681513	24.3603	0.523999	0.781216	-23.2899
chr1	3675539	3675690	152	chr1:3675539-3675690	7	GATCCCCCTTAAGAGCCAGTGTCCGGGATGGCTGGGCCAGACGGGGCAGAGGGGCCTGTGTCTCCTGCCCAGGCTGAGTGCGGACGGCTCGGTCTCAGAGCTCCACCGAGGGGTGGGTAGGTAACAGCAGCCCTGCGGCCAGGGCCCCTGCA	Intron (ENST00000378295.9/7161, intron 1 of 13)	1	3682366	3733079	50714	1	7161	ENST00000603362.5	-6676	ENSG00000078900	TP73	tumor protein p73	0.0733743	0.603103	25.1317	0.461936	0.75726	0.621796	0.203351	0.726107	24.1683	0.889459	0.940684	-0.378204	0.0134976	0.476039	25.1317	0.183554	0.781216	1.49055
chr1	3732810	3732966	157	chr1:3732810-3732966	16	CTGAAGCAGGGCCACGACTACAGCACCGCGCAGCAGCTGCTCCGCTCTAGCAACGCGGCCACCATCTCCATCGGCGGCTCAGGGGAACTGCAGCGCCAGCGGGTCATGGAGGCCGTGCACTTCCGCGTGCGCCACACCATCACCATCCCCAACCGCG	3' UTR	1	3727478	3733367	5890	1	7161	ENST00000604566.1	5332	ENSG00000078900	TP73	tumor protein p73	0.173089	0.603103	-24.7123	0.389207	0.704072	-23.4942	0.234049	0.726107	-4.07505	0.889459	0.940684	-0.282863	0.22065	0.681513	-23.9335	0.244564	0.781216	-23.8631
chr1	3732966	3733122	157	chr1:3732966-3733122	14	GGCGGCCCAGGCGGCGGCCCTGACGAGTGGGCGGACTTCGGCTTCGACCTGCCCGACTGCAAGGCCCGCAAGCAGCCCATCAAGGAGGAGTTCACGGAGGCCGAGATCCACTGAGGGCCTCGCCTGGCTGCAGCCTGCGCCACCGCCCAGAGACCCA	3' UTR	1	3727478	3733367	5890	1	7161	ENST00000604566.1	5488	ENSG00000078900	TP73	tumor protein p73	0.173089	0.603103	-24.7123	0.389207	0.704072	-23.4942	0.234049	0.726107	-4.07505	0.889459	0.940684	-0.282863	0.22065	0.681513	-23.9335	0.244564	0.781216	-23.8631
chr1	4398953	4399244	292	chr1:4398953-4399244	1	CCCTGCAGAAAGAACATGGTGCTCTGAGTTCCTGGGCCATCGTTCTCCCTGGAGGGGCTGCTGAAGCCACAATGCTCTGTTCAGTCTTCTCAAGAATTGGCAAGAAAGAGCCTTGTGCATTGAAGGCCACTGAGGTCATGTCCTCCTGGGTCTGCAGGGCTTTCCTCAGGAGACAGGACTTTTCCAAAGCCTTGGACCCATTCTCCAAGGTAAGCAAAAGCAGCAGAAAGAACCAGAAAATGAACCAGCAACTTGGGGCTGACATCCAGGAGTCCCCAGGTGAACAGGGAAA	Distal Intergenic	1	4412027	4424689	12663	1	284661	ENST00000635002.1	-12783	ENSG00000235054	LINC01777	long intergenic non-protein coding RNA 1777	0.152084	0.603103	24.8934	0.0543496	0.704072	25.0539	0.306975	0.726107	23.9299	0.176959	0.682531	24.0539	0.0464076	0.476039	24.8934	0.00939208	0.781216	25.0539
chr1	4686862	4687151	290	chr1:4686862-4687151	4	CACTCACTTTTATTAGCCCTGCTTCTAGGATGTCAACCTCCAAGCAAAGGGAATCTCCACTTCTGCCGAGGGGTCAGAGCTGATGGAGTGCCCGTGAGGTTGGGCTGCCCACTTCCTGCCCAAGTTGACCAGGGCTGCCTCTGCCAGCTGCAGAGCACAACCAACCCCCTGCAAGGCCATGTCCTCACCACGGATGGGGACAGGAACCTGGAGCCCCATCCCTACTTCCAACCTCTGTGTAGGCCTTTTCCTCGCTCTTTCCTTTCCTCCTCTTTACAGAATCCATTCCA	Intron (ENST00000378191.5/55966, intron 1 of 5)	1	4711155	4712165	1011	1	55966	ENST00000466761.1	-24004	ENSG00000196581	AJAP1	adherens junctions associated protein 1	0.353872	0.603103	-22.9261	0.945411	0.951591	-1.20145	0.690137	0.845217	0.584005	0.717538	0.879899	-2.20145	0.325495	0.704731	-23.9164	0.596098	0.781216	-0.332699
chr1	5337409	5337588	180	chr1:5337409-5337588	1	GCCACTCACTCACTGCAGAAGAGAGCCACTGCAGTATTAGAAAACACTGAATCCTCAGTCTGTCCTCTACATCCAACCTGATGCACCTGTTCGAAAGCTTGGGGACTGGGGGCTGGGGAAAACAACTACTTCCTCCCACTGAAAAGAAGACAGAAGCATTCACTACCAAGCCCTGCAGTC	Distal Intergenic	1	5490829	5492804	1976	2	105376686	ENST00000649109.1	155216	ENSG00000284692	LOC105376686	uncharacterized LOC105376686	0.329114	0.603103	23.2962	0.389207	0.704072	-23.0946	0.306975	0.726107	23.4272	0.753887	0.879899	-0.541278	0.649975	0.806744	0.816913	0.350384	0.781216	-23.3203
chr1	6128648	6128805	158	chr1:6128648-6128805	3	AGAGGGCTGCAGGGTTGGCGGGCAGTGCCCAGAGACACCACCCTGGGCTGTCCTAGCCAGGAGATACAGGTGGGGGGTGCAGAAGAGAGGCTGTGTGTTGGAGCGGGCAGGGACCCAAGCAAGCCCTGGATGGGTGTCTCAGCCGGGCCACCCCAGTC	Promoter (<=1kb)	1	6125534	6128542	3009	2	26038	ENST00000491020.1	-106	ENSG00000116254	CHD5	chromodomain helicase DNA binding protein 5	0.152084	0.603103	24.0584	0.945411	0.951591	-1.13333	0.306975	0.726107	23.0949	0.717538	0.879899	-2.13333	0.0464076	0.476039	24.0584	0.596098	0.781216	-0.264575
chr1	6129071	6129266	196	chr1:6129071-6129266	4	TGGGGAGACCTGCACCTCAGCACCCGTGGCTCACCCAGGGCTCCAGGCAATGGAGGAGATCACACCCATGAGCTCAAGAGCATGGAATGGGCTGCATGACTGTGTAGGGAAAGGCGTGTGGTGCGTCCAGGTGTGTGGAGCCCACCACTGCAGCTGGGCTCCCTCCCTGACTGCGGAGCCTCCCACAAGCCTGGGT	Promoter (<=1kb)	1	6125534	6128542	3009	2	26038	ENST00000491020.1	-529	ENSG00000116254	CHD5	chromodomain helicase DNA binding protein 5	0.152084	0.603103	23.8319	0.945411	0.951591	-0.811402	0.306975	0.726107	22.8685	0.717538	0.879899	-1.8114	0.0464076	0.476039	23.8319	0.596098	0.781216	0.0573529
chr1	6454162	6454368	207	chr1:6454162-6454368	22	GCCTGTTCTTGCCGCCGCAGCAGCGACCAGCGACCGGCCGTGCCCCACGCCACCGACCAAAGTGGACACTGCCCAGAGCCTGGAGCGGCGGCTCAGGCCGAAGCCTCACCCCAGCGTCACCCCCCGCCGGCCAGACGCGGTCCCTCCCTGCAGACGCAGCCCCGCGGAGCCATTACACCACCCGGGACATGCAAAAGGCTCCCGGCG	Promoter (2-3kb)	1	6451717	6460405	8689	1	83715	ENST00000477679.2	2445	ENSG00000187017	ESPN	espin	0.329114	0.603103	24.2754	0.389207	0.704072	-24.0738	0.484642	0.84435	23.3119	0.210736	0.682531	-24.0738	0.167938	0.681513	24.2754	0.523999	0.781216	-23.205
chr1	6454368	6454574	207	chr1:6454368-6454574	20	GCCACGGCGGGAGCTAGGCCAGAGGGAGACGCGCCTCCCTCCCCTCTCTTGTCTTCCCCGCCTTAGCTGACGGCCGCCAGCTCGTGCTGCTACCCCCGCGAGGGCTGGAGGTACTCCCGCGAGCACAACGCCATCCTCGGGCCCTTTGGCGAGCTTATGACCGAAGCCGACATCCTCCGCATCGAGCAGCAAATCGAGAACCTGCAG	Promoter (2-3kb)	1	6451717	6460405	8689	1	83715	ENST00000477679.2	2651	ENSG00000187017	ESPN	espin	0.329114	0.603103	24.2754	0.389207	0.704072	-24.0738	0.484642	0.84435	23.3119	0.210736	0.682531	-24.0738	0.167938	0.681513	24.2754	0.523999	0.781216	-23.205
chr1	7064362	7064636	275	chr1:7064362-7064636	1	TAGCTTCTGAAGATCTCACCTCCAAATACCATAGCATTGGGGGTTGGGGCTTCAACCTATTAATTTTGGGGAAATACAATTCAGTCCATAGCAGTCAGTAAATAGATAAAGCGAATTTCCCTGGTGGGAAGTGCTGCAGAGGAAGAAGTGCTGGGAGGAGGGTGATGGTTGGGGAGGGAGGGGGTAGTCCCTGAGGAGGCAGCAGTTTAAGCTGAGATGGGAAGGAAGAGAGGAAGGTGGCCAGTGGAGGGCCAGGAAAGGAGGATTTTGGGTGA	Intron (ENST00000303635.12/23261, intron 3 of 22)	1	6874056	6887842	13787	1	23261	ENST00000467267.1	190306	ENSG00000171735	CAMTA1	calmodulin binding transcription activator 1	0.544211	0.803215	1.15103	0.113079	0.704072	-24.9114	0.967269	0.999197	0.187551	0.0248533	0.576841	-24.9114	0.22065	0.681513	2.08064	0.244564	0.781216	-24.0426
chr1	7318592	7318881	290	chr1:7318592-7318881	4	CTTAGTTGACCACTCAGCTGAGAGAGCTACCAAATCAGAATTCCACAGGAGAGGATGGTTGGGTTCCTCAGCTATTTTGGAGGATGACATAAAATGTTGCAGAGGGAGAACCCTTCTCTGCAATCAGACGAGATTTTCCTCATTGTTCTGCAGGGCCTCACATGTTACCAATGAAAGCCAGCTCCCTGGTGCCACGCGTTTTACTCATTGCTGGATCCCTAGGGCCTAGCACAGTGCCTGGAACATGCACGTGCCTCTGGGCATATTCAGTGAATGAATGAACAAGGGAA	Intron (ENST00000303635.12/23261, intron 5 of 22)	1	7368942	7370270	1329	1	23261	ENST00000427317.1	-50061	ENSG00000171735	CAMTA1	calmodulin binding transcription activator 1	0.972134	1	0.217176	0.123414	0.704072	25.4936	0.690137	0.845217	-0.746298	0.27781	0.682531	24.4936	0.614107	0.806744	1.14679	0.0361852	0.781216	25.4936
chr1	7680050	7680229	180	chr1:7680050-7680229	16	CTTGATAAATACTAAGGGAGGGGAGGGGAAGCAGCGCCGCAGTCGCAGCGCAAAGGGGGCCGCGGGAACAGCTAGTCGGGAGCGCGGGGGTCCCGGGCCTCTGGCCAGCCACGGGGCCTGGCCATGAACTTTGCGTCCGGGCCAATGCTGCAGTGGCCGGGCGGTGGTGAGCCTTCCGTT	Intron (ENST00000303635.12/23261, intron 11 of 22)	1	7671996	7767019	95024	1	23261	ENST00000700422.1	8054	ENSG00000171735	CAMTA1	calmodulin binding transcription activator 1	NA	NA	0	0.891077	0.951591	0.814749	0.306975	0.726107	23.6893	0.753887	0.879899	-0.185251	0.325495	0.704731	-23.6527	0.561579	0.781216	1.6835
chr1	7680229	7680408	180	chr1:7680229-7680408	20	TCCCCGCCTGTCCCTCCCGGCCCCTCCCCTCGGTCTCCGCAGCTTCTCGGCTCAGCCCCTCCCGTCCCCGCGGGCGCTGGGCCGATTCTCCCTCCGCGCTGGCCAGGCCGTGGAGACGGGTTCGCCGCGGAGAGGGGAGGAGGGCTGGGGAAGGGGTGGGCGCCAGGGGACTGCAGCGCG	Intron (ENST00000303635.12/23261, intron 11 of 22)	1	7671996	7767019	95024	1	23261	ENST00000700422.1	8233	ENSG00000171735	CAMTA1	calmodulin binding transcription activator 1	NA	NA	0	0.891077	0.951591	0.814749	0.306975	0.726107	23.6893	0.753887	0.879899	-0.185251	0.325495	0.704731	-23.6527	0.561579	0.781216	1.6835
chr1	8317785	8317950	166	chr1:8317785-8317950	13	GCACTGCGGCATTCACGTATCCGCGAACACATGGGTATCTATTTATACATGAAGACACGAAAATGTATTTATTTCTTTTAAAATCAGAAGAAAACGGTGAGAACTGTGAGGCCGGGGGGACGTTTTCCTCCGGGATCCTGGCAGATCCTGCAGACCGCGCCGTCGT	Promoter (<=1kb)	1	8318114	8344165	26052	1	50651	ENST00000471889.7	-164	ENSG00000162426	SLC45A1	solute carrier family 45 member 1	0.972134	1	0.496198	0.292615	0.704072	23.6508	0.690137	0.845217	-0.467276	0.27781	0.682531	23.4535	0.614107	0.806744	1.42581	0.561579	0.781216	1.5702
chr1	8317950	8318115	166	chr1:8317950-8318115	25	TGCGCGAAGCACCGGGACGGGCCTCCCGCGGGAAGGGCCCAGGAGGACACCGGGCTCCCCTCCCGCCCGCGGGGCCCCAGACGCGGCGCCGCTTTAAGGCTCCGGGCCCCGCGCGGATGCGGAGGCTGCGGCCGTGACGTCAGCGCCCCGCCCCGGGTGATGCTGC	Promoter (<=1kb)	1	8318114	8344165	26052	1	50651	ENST00000471889.7	0	ENSG00000162426	SLC45A1	solute carrier family 45 member 1	0.972134	1	0.496198	0.292615	0.704072	23.6508	0.690137	0.845217	-0.467276	0.27781	0.682531	23.4535	0.614107	0.806744	1.42581	0.561579	0.781216	1.5702
chr1	8342548	8342720	173	chr1:8342548-8342720	2	TCTGCAGTGCAGCTGTGGGCTTCGAGCTCCATCTGTGCTGTTTCCTGGGTCAGCGCCTCCTTCCCTTTTATGGTCACATAATGTTCCCACCATAATTTTCCTTTGCAGTGACTTTGAAATCTTAAAATGCTGCATTGAAATATTACCTGGACAGTCTGGGCAACATAGTCAGA	Intron (ENST00000471889.7/50651, intron 8 of 8)	1	8330428	8336109	5682	1	50651	ENST00000481265.1	12120	ENSG00000162426	SLC45A1	solute carrier family 45 member 1	0.152084	0.603103	24.1995	0.891077	0.951591	2.99595	0.306975	0.726107	23.2361	0.753887	0.879899	1.99595	0.0464076	0.476039	24.1995	0.561579	0.781216	3.86471
chr1	8342720	8342892	173	chr1:8342720-8342892	2	ACCCCATCTCTAAAAAAATAAAATTAAAAATTAGCCAGGTGTGGTGGCATGCACCGGTAGTTCCAGCTACTCGGGAGGCTGAGGTGGGAGGATCACTTGAGCCCAGGAGGCTGAGGCTGCAGTGGGCTGAGATTGTGCCACTGCACTCCAGCCTGGGCAACAGAGCAAGACCC	Intron (ENST00000471889.7/50651, intron 8 of 8)	1	8330428	8336109	5682	1	50651	ENST00000481265.1	12292	ENSG00000162426	SLC45A1	solute carrier family 45 member 1	0.152084	0.603103	24.1995	0.891077	0.951591	2.99595	0.306975	0.726107	23.2361	0.753887	0.879899	1.99595	0.0464076	0.476039	24.1995	0.561579	0.781216	3.86471
chr1	8360949	8361116	168	chr1:8360949-8361116	12	CCGGGTGGGCCCTGACCGTGCAGTGGGGGCTGGGCATGAGAGGGTGCAGAAGGCTGGCCCGCCGACCCAGTCAGAGGCTGCAGCGGGGGATGTGGCGAGGGATGCGGCGGGGGATGCGGTGAGGGCGGCCGCTGGGGGTGCAAGGCCGGTGCCTGTTGGATGTGGGTG	Promoter (1-2kb)	1	8355521	8362844	7324	2	473	ENST00000505225.1	1728	ENSG00000142599	RERE	arginine-glutamic acid dipeptide repeats	0.972134	1	1.24333	0.389207	0.704072	-24.966	0.690137	0.845217	0.279854	0.717538	0.879899	-1.8973	0.614107	0.806744	2.17294	0.350384	0.781216	-24.6268
chr1	8361116	8361283	168	chr1:8361116-8361283	4	GTGGGGAACAGGCGCTGTGGGAGCCTGTGGCTGGTTAGGGGCCTGGGAGGCCGTGGGGGAGCCCTGTGGGGGAACTGCAGTGGCAGAGGGCGTGGGCCCTGGCGTGGGCAGCTGAGGGGTCCCTGGAGGAGCTGAGGAGGGAGCTGGGGTGACCCCAGTGGGAGCCTG	Promoter (1-2kb)	1	8355521	8362844	7324	2	473	ENST00000505225.1	1561	ENSG00000142599	RERE	arginine-glutamic acid dipeptide repeats	0.972134	1	1.24333	0.389207	0.704072	-24.966	0.690137	0.845217	0.279854	0.717538	0.879899	-1.8973	0.614107	0.806744	2.17294	0.350384	0.781216	-24.6268
chr1	8878621	8878846	226	chr1:8878621-8878846	24	TGCTGCAGACACCGAGGTGAACGTAAAGCCGGCGAGATCTCCGTGCTCCGGGTACCCACAGATACTGTCCGCGCCGCCCGCGCCGACTTCCTGCCTAGCTAAGGCGAGCCCCACCCACTTCCCGCCTCCGGGGCACGCCCCCTCAGCTCCGCCTCGCCATTCGTCGGGAGAGCCGTCACTCATTCCCTCACCTCCCGGAAAGGGGTGGGACTGCGACGGCTGCAGT	Promoter (<=1kb)	1	8878835	8879894	1060	1	100505975	ENST00000442636.1	0	ENSG00000230679	ENO1-AS1	ENO1 antisense RNA 1	0.506552	0.782886	5.65556	0.205257	0.704072	-25.5345	0.934592	0.999197	4.69209	0.283631	0.682531	-6.30954	0.205398	0.681513	6.58517	0.244564	0.781216	-24.6955
chr1	9353377	9353527	151	chr1:9353377-9353527	2	GCAGCGCCATGGAGGGAGTCCTAGAGGTTTCAGTGGCTCCCAGGAGAGGAGATGGAACTAAAAGCTTGAAAATGGGATTTTCCTGGGAGATCATGGATGTGAGGTCACAGTATTCACAGAACTCTCTGGAACCAGGGCGGCCCTCTAGGCT	Promoter (1-2kb)	1	9351431	9367863	16433	1	80176	ENST00000357898.3	1946	ENSG00000171621	SPSB1	splA/ryanodine receptor domain and SOCS box containing 1	NA	NA	0	0.292615	0.704072	21.8013	0.484642	0.84435	20.7639	0.456779	0.828721	20.8013	0.501742	0.806744	-20.7273	0.146673	0.781216	21.8013
chr1	9829733	9829907	175	chr1:9829733-9829907	6	ATATTTTTCCCCTGTTGATGGGTCGTTTCCAATTTTTTGTTTTTATGGAATGCTGCAGTGAAGCCTTTTTTTTTTTTTTTTTTTTTTTGAGACGCAGTCTCGCTCTGTTGGCCATGCTGGAGTGCAGCGGCGTGATCTTGGCTCACTGCAACCTCTGCCTCCCGGGTTCAAGTGA	Distal Intergenic	1	9729028	9823984	94957	2	22883	ENST00000361311.4	-5749	ENSG00000171603	CLSTN1	calsyntenin 1	0.173089	0.603103	-24.0929	0.945411	0.951591	-1.52761	0.0550356	0.726107	-24.0929	0.717538	0.879899	-2.52761	0.325495	0.704731	-23.1633	0.596098	0.781216	-0.658856
chr1	9894379	9894670	292	chr1:9894379-9894670	4	AGTGTCTCGCTCTGTCACACAGGGTGGAGTGCAGTGGTGCGATCACAGCTCACTGCAGCCTCAACATCCAGGGCTCAAGTGATCCTCCCCCCTCAGCCTCCTGAGTAGCTAGGATTAGAGGTGTGCACAACCACACTCGACTGCTTTTTTTTTTTCTTTTCTTTTGTGAGACAGGGTCTCACCCTGTCACCCAGGCTGGAGTGTAGTGGTGCAATCTCAGCTCACTGCAACCTCCACCTCCCAGGCTTAAGCGATCCTCCCACCTCAGCCTCCCAAATAGCTAGGCCTGCAG	Promoter (1-2kb)	1	9850450	9893237	42788	2	56998	ENST00000377258.5	-1142	ENSG00000178585	CTNNBIP1	catenin beta interacting protein 1	0.329114	0.603103	22.5768	0.891077	0.951591	0.676881	0.306975	0.726107	22.4266	0.753887	0.879899	-0.323119	0.614107	0.806744	1.40125	0.561579	0.781216	1.54564
chr1	10844938	10845081	144	chr1:10844938-10845081	0	TATCTAATCCAGAATTTTATATTGCATTTAATTGTCATGACTCCCTCTGGTCTATGACAATTTCTCAGTCTTTTTTTTTTTTGAAACTGAATCTCACTCTGTCATTCAGGCTGGAGTGCAGTGGCATGATCACAGCTCACTGCA	Distal Intergenic	1	10647213	10796650	149438	2	54897	ENST00000344008.5	-48288	ENSG00000130940	CASZ1	castor zinc finger 1	0.644036	0.849049	0.96955	0.389207	0.704072	-23.8811	0.267894	0.726107	0.00607585	0.920918	0.940684	-1.62353	0.983438	1	1.89916	0.244564	0.781216	-23.6317
chr1	11416279	11416454	176	chr1:11416279-11416454	1	CAGGGCATGCACCCACCCCTAGCTGCTGGAATTAGAAGCTGCTGATAGCTCAAAACTGTGCCCCTCACAGAGCATTGCCTTTGGCCTATAGACCTGTCTTGATCAATGTCACACCCTACCCCACCCCTCCCTGCAGGCCCCCTGACAATGACAGATGTAACTATACAAACGTCTGT	Distal Intergenic	1	11479155	11537551	58397	1	57540	ENST00000294484.7	-62701	ENSG00000204624	DISP3	dispatched RND transporter family member 3	0.353872	0.603103	-24.0468	0.205257	0.704072	-25.1047	0.690137	0.845217	-0.536629	0.070489	0.576841	-25.1047	0.325495	0.704731	-24.3064	0.350384	0.781216	-24.236
chr1	11416454	11416629	176	chr1:11416454-11416629	5	TTCCCTTGCCTCTATTTGGGACCTCTGTAGTGACCAGTCCAGGTCCAGAGCCCTTCACGGGATGAGCTCAGATCTTAGGGGCAACGATTGAGGATCGGCTTCTCCCTCTGGCCAGTCCTGCAGTGATCTCGGATCAGTTTCCCTCTGGCAGTACTGCTGTGCTCGCTACCCTTCAG	Distal Intergenic	1	11479155	11537551	58397	1	57540	ENST00000294484.7	-62526	ENSG00000204624	DISP3	dispatched RND transporter family member 3	0.353872	0.603103	-24.0468	0.205257	0.704072	-25.1047	0.690137	0.845217	-0.536629	0.070489	0.576841	-25.1047	0.325495	0.704731	-24.3064	0.350384	0.781216	-24.236
chr1	11775851	11776002	152	chr1:11775851-11776002	2	CTGCAGGCTTTCTCAGTGCTGGTATCCTAGATCCTGCCCAGAAGGGATGTGGGCCCTGCTCTTGGGAAGCTCCTGGTGTGATGGGGGACACACAGCCCTAATCCCCACCCCAAAACTTAACTGGGGGCCCGGTGTAGTGGCTCACGCCTGTA	Promoter (2-3kb)	1	11778931	11789478	10548	1	284498	ENST00000444493.5	-2929	ENSG00000215910	C1orf167	chromosome 1 open reading frame 167	0.0454222	0.603103	-26.4905	0.233783	0.704072	1.69229	0.0355946	0.726107	-2.51474	0.425083	0.828721	1.08491	0.105385	0.681513	-25.9668	0.164149	0.781216	1.68528
chr1	11922825	11922969	145	chr1:11922825-11922969	7	GTCCTGCAGGTGTGTGAGGTCGGTGGAGATGTAGAGCAGTGGCGTGATGGGCTGTGTCACCATGACCGAGAAGGTGTGGCCCGTGGGCGCCGAGGTCAGCTCCACTGGCTCGTCCAGGCAGCCTGCCTTGCAGGCATAGATCTTG	Exon (ENST00000376572.8/90231, exon 2 of 3)	1	11920183	11926403	6221	2	90231	ENST00000616327.1	3434	ENSG00000116685	KIAA2013	KIAA2013	0.972134	1	0.170268	0.205257	0.704072	-25.5676	0.934592	0.999197	0.512085	0.283631	0.682531	-2.12954	1	1	-0.265706	0.244564	0.781216	-25.161
chr1	11922969	11923113	145	chr1:11922969-11923113	11	GACAGGCTGGCCACGGGACTCCACGGACACGTGTAGGTAGGGCTTGCCCTCGGCATCCGCCAGCACGGCCAGGTTGATATGGTCGTTCTTGTAGCGGATGCCATGCAATGCATAGCTGTTGTGCAGCACGTCGGGGTCGGCCTGG	Exon (ENST00000376572.8/90231, exon 2 of 3)	1	11920183	11926403	6221	2	90231	ENST00000616327.1	3290	ENSG00000116685	KIAA2013	KIAA2013	0.972134	1	0.170268	0.205257	0.704072	-25.5676	0.934592	0.999197	0.512085	0.283631	0.682531	-2.12954	1	1	-0.265706	0.244564	0.781216	-25.161
chr1	11923113	11923257	145	chr1:11923113-11923257	1	GAACTGGAGGTGGTTCTCTGTGAACTGCAGCCCCCCAAAGCTGAGCACCATCCCCTGCAGGATGCCTGGGGCACCCACCTTCACCAGCCCCTTGCAGCCACGCTTCTGGAGGGTCAGCCTCCACAGGTCAGAGAGCTGCAGGATC	Exon (ENST00000376572.8/90231, exon 2 of 3)	1	11920183	11926403	6221	2	90231	ENST00000616327.1	3146	ENSG00000116685	KIAA2013	KIAA2013	1	1	-0.0707404	0.205257	0.704072	-25.4749	0.967269	0.999197	0.419357	0.301844	0.682531	-2.03681	0.983438	1	-0.506714	0.244564	0.781216	-25.0943
chr1	11925621	11925778	158	chr1:11925621-11925778	16	ATGCGCTGCAGGTAGACGTGGGGTCGGCCCCTGTGCGCCAGAAAGTCCTCTTGCAGCAGCACGCAGTCGCGGCCGGACCCCGCGGCAAGGCCAGAGACGGAGGCGGGCCCGGGGCCGGCGGCCACGGGGCCAGGACCTGGGGACCCCAGCTGCAGGCA	Promoter (<=1kb)	1	11920183	11926403	6221	2	90231	ENST00000616327.1	625	ENSG00000116685	KIAA2013	KIAA2013	0.329114	0.603103	21.5473	0.205257	0.704072	-23.6943	0.306975	0.726107	22.9324	0.070489	0.576841	-23.6943	0.649975	0.806744	-1.0332	0.350384	0.781216	-22.8255
chr1	12191459	12191643	185	chr1:12191459-12191643	17	GACTGCAGGGAGGAGCGGGACTGTGGGGAGGAGCGGGACTTCGGGGAGGAGCGGGACTGCGGGGGACGAGCGCGACTGCGGGGGACGAGCAGGACTGCGGAGAGTAGCGGGACTGCGGAGAGTAGCGGGACTGCGGAGAGTAGCAGGACTGCCGGTCCTGCCCCTGGACTCTGGCCGGTGTTGTG	Promoter (<=1kb)	1	12191713	12191773	61	1	100616438	ENST00000584158.1	-70	ENSG00000263676	MIR4632	microRNA 4632	0.0884075	0.603103	-26.4077	0.113079	0.704072	-26.2765	0.0173132	0.726107	-26.4077	0.0248533	0.576841	-26.2765	0.22065	0.681513	-25.4781	0.244564	0.781216	-25.4077
chr1	12191643	12191827	185	chr1:12191643-12191827	11	GTGTGCCCCATGCTGAGGCGGTCCGCCAGCCTCCTGGAGATCCGCTGTCTGAGAGTGCTGGGCTGTCTGGGAGGGCAGCGTGGGTGTGGCGGAGGCAGGCGTGACCGTTTGCCGCCCTCTCGCTGCTCTAGACCAGGTGGAAACTCAAGCCTGCACTCGGGAACAGAACCGCATCTGCACCTGCA	Promoter (<=1kb)	1	12191713	12191773	61	1	100616438	ENST00000584158.1	0	ENSG00000263676	MIR4632	microRNA 4632	0.0884075	0.603103	-26.4077	0.113079	0.704072	-26.2765	0.0173132	0.726107	-26.4077	0.0248533	0.576841	-26.2765	0.22065	0.681513	-25.4781	0.244564	0.781216	-25.4077
chr1	12537678	12537820	143	chr1:12537678-12537820	1	CCATATCCAATCCATCAGAAAATCCTGTTGGCCCGACCTTGGAAAGCTACCCCACCATCATCTCCCTCCTGGATTATTACTGTAGCATTCTCAATGGTTCCTTGCTTCCTCCCTTGCCTCCTGTGCCAGCTGAGACCACTGCA	Distal Intergenic	1	12527724	12528420	697	1	105376744	ENST00000416696.1	9954	NA	LINC02766	long intergenic non-protein coding RNA 2766	0.506552	0.782886	4.10734	0.891077	0.951591	3.53818	0.934592	0.999197	3.14386	0.858173	0.940684	3.31258	0.205398	0.681513	5.03695	0.917251	0.986213	1.44007
chr1	13995794	13995945	152	chr1:13995794-13995945	2	CTGCAGACAGCCTATTGTGGGACCTTGTGATCATGTCTCAAGCATTTTTCCAGATTTTTTTTCTGCTAAGCTCACCATTGTTTTGGCTTTGAAGCTCAACATGATAGAGGCGGTGCCAAGATGGCAGACCAGAAACAGCAGCGATCAGAGGC	Intron (ENST00000636564.1/23254, intron 1 of 2)	1	13892792	15118043	1225252	1	23254	ENST00000636203.1	103002	ENSG00000189337	KAZN	kazrin, periplakin interacting protein	0.644036	0.849049	2.23365	0.205257	0.704072	-24.9957	0.267894	0.726107	1.27017	0.283631	0.682531	-5.07143	0.983438	1	3.16326	0.244564	0.781216	-24.1962
chr1	14650476	14650618	143	chr1:14650476-14650618	1	CTGCAGTGAGCCATGTTCGTGCCACTGCACTCCACACTCCAGCCTGGGGGATAGAGTGAAACCCTGTCTCAAAAACAAACAGATAAACAAAAAAGACACAATGGGACCAAGAGCCAACAGAAGGGTTTTCTGATACTGTATAT	Intron (ENST00000636203.1/23254, intron 3 of 16)	1	14598717	15065797	467081	1	23254	ENST00000503743.5	51759	ENSG00000189337	KAZN	kazrin, periplakin interacting protein	0.506552	0.782886	5.41554	0.205257	0.704072	-25.8417	0.934592	0.999197	4.45206	0.283631	0.682531	-6.06951	0.205398	0.681513	6.34514	0.244564	0.781216	-25.008
chr1	14988947	14989109	163	chr1:14988947-14989109	1	CCTTGTCTGGTAGCTGCAGTTTGTCCCTCGTTGTGCCACACTTTGCACCACCACCTTCAACAGCTACCTATTGAGGCCCCATCTAGGTGCTGGTGCCATCATGGTTCTGTCTTGACATCTGGGACAGCAGGCTTTCCTGGAGCCTCATGTACCTGCCTTCCCA	Intron (ENST00000636203.1/23254, intron 4 of 16)	1	14945919	15065797	119879	1	23254	ENST00000400797.3	43028	ENSG00000189337	KAZN	kazrin, periplakin interacting protein	0.972134	1	2.8088	0.205257	0.704072	-23.097	0.690137	0.845217	1.84533	0.070489	0.576841	-23.097	0.614107	0.806744	3.73841	0.350384	0.781216	-22.2283
chr1	15194717	15194949	233	chr1:15194717-15194949	4	GCCTCTTGTTGGCTGTGGTCTTGTACATTGTGTCTTTCTCATTTCCGTGGATGATATTGCGTTCTGTCTCATTCTGATTGGTTATCCCCTACCTTACGTTTTTCAGCCAGCAATTTTATTTTCCTGGCCATAAATTCAAGAGCGCACCTGCAGCAACACTATCCAATGGAAAGAGAATTCAAGCCCCATATATAATTTTACTTTTTTTTTTTTTTTTTTTTTTTGAGACAGGG	Intron (ENST00000428417.5/55092, intron 1 of 2)	1	15168474	15171317	2844	2	727684	ENST00000625027.2	-23400	NA	C1orf195	chromosome 1 open reading frame 195	0.558447	0.812142	0.867981	0.553129	0.850258	0.508424	0.38959	0.84435	0.966091	0.757917	0.883047	-0.00471151	0.884643	0.987667	0.26662	0.196966	0.781216	0.819713
chr1	15931886	15932042	157	chr1:15931886-15932042	7	CTCTGCTGCAGACCTTGAACATCCCGAACCAAGTTTGCCTCTCAGCCGAACAAGGCGCCGGAATGTAAGGAGCGTCTATGCAACCATGGGTGACCATGAAAACCGCTCTCCTGTCAAAGAGCCCGTTGAGCAACCAAGAGTGACCAGAAAGAGATTG	Exon (ENST00000375759.8/23013, exon 11 of 15)	1	15938583	15939544	962	1	23013	ENST00000487496.1	-6541	ENSG00000065526	SPEN	spen family transcriptional repressor	0.0884075	0.603103	-23.6224	0.559211	0.855161	0.241412	0.456744	0.84435	-0.480705	0.874157	0.940684	-0.12132	0.0731085	0.61358	-23.9136	0.35801	0.781216	0.485026
chr1	15989206	15989363	158	chr1:15989206-15989363	4	ACAGGGCTGCAGGACCTTGGTCCCCCACCTCCCTGTGCCCTCAAGGTCAGGGGTGTGGGGTGTGCCTGGGCTTTCCTGGGCGGGTGCCCCACGCTCCATGAAGTAGAAGTTGTAGGTCACCATTGGCTCGAGTGGTGCACCCACCGGGCTGCTGGCTT	Exon (ENST00000613591.1/ENST00000613591.1, exon 1 of 1)	1	15941871	15976132	34262	2	7709	ENST00000375733.6	-13074	ENSG00000116809	ZBTB17	zinc finger and BTB domain containing 17	1	1	-2.9034	0.389207	0.704072	-23.4421	0.65379	0.845217	-3.86688	0.717538	0.879899	-3.69816	0.649975	0.806744	-1.97379	0.350384	0.781216	-22.7462
chr1	16619557	16619765	209	chr1:16619557-16619765	4	CATGCCCAGCGTGGGGTGGGACGAGGCATGGGAGAATATGGAACAGCTTTCCTGGTGTCACGACTGTCACTGTCACTCAGTAAGTGCTCACTGTGTGCCAGGCATGGAGCACAGCAAAGCCTCACGAACCCCCTTCTAATCCTCCCCTCCTGCAGGTAAGGAAACTGAGGCCCCCAAGAGGGCAGTGGCCTGCCCCAGGGCTCCTAGCT	Intron (ENST00000639481.1/84809, intron 3 of 3)	1	16599589	16613562	13974	2	55672	ENST00000599069.5	-5995	ENSG00000219481	NBPF1	NBPF member 1	0.329114	0.603103	24.073	0.292615	0.704072	24.1233	0.306975	0.726107	24.0977	0.27781	0.682531	24.1352	0.614107	0.806744	1.02371	0.596098	0.781216	1.12068
chr1	16619765	16619973	209	chr1:16619765-16619973	9	TGCCAAGTGGCAGAGCAGGGCCCGGCCCCAGAACTGGAGCAGCTCAGAGAGCAGCAGAGGCCACGCCAGGGCTCACGAACCTGCTGCTTCTCGCTCTCGGCCAGGAGGAGGCCCTCGTCATGCTCCTGCTGCAGGGCAGCAATCTCCTCACTCAGCTGTTCCTTCTCAGCCTTCCGCCGGGCCAGCAGCTCCTCCTGCTCACGCTGCAG	Exon (ENST00000639481.1/84809, exon 3 of 4)	1	16599589	16613562	13974	2	55672	ENST00000599069.5	-6203	ENSG00000219481	NBPF1	NBPF member 1	0.329114	0.603103	24.073	0.292615	0.704072	24.1233	0.306975	0.726107	24.0977	0.27781	0.682531	24.1352	0.614107	0.806744	1.02371	0.596098	0.781216	1.12068
chr1	16644045	16644229	185	chr1:16644045-16644229	10	GTTCTATTAGACAGCGCAGGTCTAGAGTTTCGCTCTGCAGCACTGCCTTAGCCAGCACTCCCTACTCTGCCGTTCAGTCTCTTATCTCGCCCCAAACAGACCCTCTACTCCCGCCACAAACCCCTGTGGGTCTGCACCACGCCTGCTCCTCGGGAAGGTGATTTTCCCGACCTCGGGCCCTCGGT	Promoter (<=1kb)	1	16625375	16644672	19298	2	84809	ENST00000635081.1	443	ENSG00000215908	CROCCP2	CROCC pseudogene 2	0.329114	0.603103	24.9758	0.945411	0.951591	-1.01528	0.484642	0.84435	24.0124	0.717538	0.879899	-2.01528	0.167938	0.681513	24.9758	0.596098	0.781216	-0.146529
chr1	17115285	17115368	84	chr1:17115285-17115368	1	ATCCTCCCACCTCCACCTCACAGACGCAGCTGGAACCTCTGCACAGGCAAAGGGACAATGTTAAGATCATTCCAGTGTCCTGAA	Intron (ENST00000375486.9/11240, intron 1 of 15)	1	17079031	17119435	40405	2	11240	ENST00000375481.1	4067	ENSG00000117115	PADI2	peptidyl arginine deiminase 2	0.222642	0.603103	0.95635	0.649249	0.941196	-0.110021	0.14259	0.726107	0.841655	0.943128	0.956423	-0.388222	0.460776	0.806744	0.575503	0.292103	0.781216	0.176712
chr1	17149104	17149288	185	chr1:17149104-17149288	16	TGGGCCTCGGTTTTCCCATCTGTGACATGGGAACGTGGGCCTGGACCAAGAGAACTCCGGAGGCCCTTCCCGCTCGGGCCCGGGGGTTGGGGAGGGGTGAAGTTCGTAGCGTGAGCAGGGTGAGAAAGGCGCGCCCCGCCGGGCCCTGACCCGTGACAGCCCGGCCCGGCCCGGGAGTGAGCCTG	Distal Intergenic	1	17066761	17119451	52691	2	11240	ENST00000375486.9	-29653	ENSG00000117115	PADI2	peptidyl arginine deiminase 2	0.329114	0.603103	22.7733	0.292615	0.704072	22.8473	0.484642	0.84435	21.8098	0.456779	0.828721	21.8473	0.167938	0.681513	22.7733	0.146673	0.781216	22.8473
chr1	17149288	17149472	185	chr1:17149288-17149472	20	GCAGCGAGGGATTAGCGCGGTAATAGCCGGGATTAGCGCAGGCTGCGAGCGCGTTAGTCACTAAACTGCGCGTTCGCATCCCGAGCCACCTCCCCTGGCCCCCGAGCTCCAATCACAAGCCAGGTCTCCACGCGCTGCCCGGGCGCGGGAGAAACTCCGGAGCCCATTGGCTCCGTGACCTGCAG	Distal Intergenic	1	17066761	17119451	52691	2	11240	ENST00000375486.9	-29837	ENSG00000117115	PADI2	peptidyl arginine deiminase 2	0.329114	0.603103	24.8888	0.292615	0.704072	24.9628	0.484642	0.84435	23.9253	0.456779	0.828721	23.9628	0.167938	0.681513	24.8888	0.146673	0.781216	24.9628
chr1	17363055	17363206	152	chr1:17363055-17363206	3	GATCCACTCGCCTAGGCCTCCCAAAGTGCTGGGATTACAGGCATGAGCCACCACACCCAGCAATTTTTATTTTTGAGGTAGAGTCTCGCTCTGTCGCCCAAGCTGCCAGGCTGGAGTGCAGTGGCACAATCACAGCTCACTGCAGCCTTGAC	Intron (ENST00000375448.4/23569, intron 15 of 15)	1	17372196	17401699	29504	1	353238	ENST00000619609.1	-8990	ENSG00000276747	PADI6	peptidyl arginine deiminase 6	NA	NA	0	0.292615	0.704072	22.1136	0.203351	0.726107	22.3646	0.176959	0.682531	22.4021	0.22065	0.681513	-22.3281	0.950293	0.986213	0.615642
chr1	17363206	17363357	152	chr1:17363206-17363357	1	CCTCCTGGGCTCAAGTGATCCTCCTCCCTCAGCCTCCAAAGTAGCTGGGACCACAGGCACGCACCACCATGCCAAGCTAATTTTTAAAAATACTTTTTTTAGAGATGGGGTCTCACCATGTTGCCCAGGCTGGTCTCAAACTCTTGGGCTCA	Intron (ENST00000375448.4/23569, intron 15 of 15)	1	17372196	17401699	29504	1	353238	ENST00000619609.1	-8839	ENSG00000276747	PADI6	peptidyl arginine deiminase 6	NA	NA	0	0.292615	0.704072	22.1136	0.203351	0.726107	22.3646	0.176959	0.682531	22.4021	0.22065	0.681513	-22.3281	0.950293	0.986213	0.615642
chr1	17363357	17363508	152	chr1:17363357-17363508	4	AAGCGATCCTCCTGCCTCAGCCTCCCAAAGTGCTGGGACTACAGGTCTGAGCCACCACCCCTGGAGGGGCTATTATTTCCAAAGGTCAGAGAAGGGTGGGGCCGCTCAGATTGCGCTGCAGGCTGCCCGCTGCTGCCTGTGACCTGAACCCT	Intron (ENST00000375448.4/23569, intron 15 of 15)	1	17372196	17401699	29504	1	353238	ENST00000619609.1	-8688	ENSG00000276747	PADI6	peptidyl arginine deiminase 6	NA	NA	0	0.292615	0.704072	22.1136	0.203351	0.726107	22.3646	0.176959	0.682531	22.4021	0.22065	0.681513	-22.3281	0.950293	0.986213	0.615642
chr1	18071675	18071903	229	chr1:18071675-18071903	12	CGGCTGGGCGCGGTGGCTCACGCCTGTAATCCCAGCACTTTGGGAGGCCGAGGCGGGTGGATCATGAGGTCAGGAGATCGAGACCATCCTGGGTAACATGGTGAACGCAGTTTCTACTAAAAATATAAAAAAAAAAATTAGCAGGGCTTGGTGGCAGGCGCCTGTAGTCCCAGCTACTCAGGAGGCTGAGGCAGGAGAATGGCGTGAACCCGGGAAGCGGAGCTTGCAG	Intron (ENST00000569711.1/101927876, intron 2 of 2)	1	18065657	18074412	8756	1	101927876	ENST00000569711.1	6018	ENSG00000261781	LINC01654	long intergenic non-protein coding RNA 1654	0.353872	0.603103	-23.4351	0.292615	0.704072	24.5018	0.690137	0.845217	0.0291903	0.27781	0.682531	24.1131	0.325495	0.704731	-24.0391	0.561579	0.781216	2.06666
chr1	18071922	18072065	144	chr1:18071922-18072065	6	CTGCAGTCCGCAGTCCGGCCTGAGCGACAGAGCGAGACTCCGTCTCAAAAAAAAAAAAAACCTCCAGTGACTCCTCAGTGCTCTCAGGATGAAATCTAAATTCCCAAATGTGCATGAACAGTGTTCTCGACCTGGTCTTTGCCT	Intron (ENST00000569711.1/101927876, intron 2 of 2)	1	18065657	18074412	8756	1	101927876	ENST00000569711.1	6265	ENSG00000261781	LINC01654	long intergenic non-protein coding RNA 1654	0.353872	0.603103	-23.4351	0.292615	0.704072	24.5018	0.690137	0.845217	0.0291903	0.27781	0.682531	24.1131	0.325495	0.704731	-24.0391	0.561579	0.781216	2.06666
chr1	18140016	18140159	144	chr1:18140016-18140159	1	GGCTCACTGCAGCCTCAACCTCCCCAGCTCAAACAATCCTTGCCTCAGCCTCCTGAGTAGCTGAGCCTACAGGTGTGCACCACCGTGCCTGGCTGATTTTTAAATATTTTTTGTAGAGACAGAGGTCCCATTATGTTGCCCAAG	Intron (ENST00000251296.4/84966, intron 1 of 9)	1	18107798	18378483	270686	1	84966	ENST00000251296.4	32218	ENSG00000117154	IGSF21	immunoglobin superfamily member 21	0.972134	1	2.6565	0.945411	0.951591	-2.31047	0.690137	0.845217	1.69302	0.717538	0.879899	-3.31047	0.614107	0.806744	3.58611	0.596098	0.781216	-1.44172
chr1	18384403	18384702	300	chr1:18384403-18384702	2	AAAACAAAAACAAGACCCCCTGGGCTCTACTCTTGCCCACGGGAGCCAGCAGCCCCAGAAAGACCCCCAAACGTGGACTTGCACATTTCTGGGGCAGAGGCAGGGATGAGGGTGGGCCAGGGTCAGGGGCTGACTCCCTTCAGAAGCACTGCAGTGCCTATGAAAATGAAAGCAAGAGGCAGGGAGAAGGAAAATCAGAGGGAGAGGAGGGGAAGGAGGAGCCTGGAAAGAGAGGGAAAGGGAGTGGGAGGGGAGCTGAGAAAGGGGAGGTGGGGAGAGGCCAGGGAGCAGAGGGAGAGA	Distal Intergenic	1	18375957	18376920	964	1	84966	ENST00000473951.1	8446	ENSG00000117154	IGSF21	immunoglobin superfamily member 21	0.595054	0.821254	-0.0676997	0.894488	0.951591	0.115498	0.13741	0.726107	-0.550057	0.487386	0.870801	-0.307682	0.679051	0.837206	0.41863	0.427415	0.781216	0.458269
chr1	18482916	18483214	299	chr1:18482916-18483214	28	CCTGCTGTTCCGCTTCTCTGCGCAGGAGCAGCGCTGGTGGGCCGGCCCCACCGGGGGCAGCAAGGACCGCACGGCCGAGATGGTGGCGGTCAACGGCTTTCTCTACCGCTTTGACCTCAACCGCAGCCTGGGCATCGCCGTGTACCGCTGCAGCGCCAGCACCCGGCTCTGGTACGAGTGCGCCACGTACCGGACGCCTTACCCGGATGCCTTCCAGTGCGCCGTGGTGGACAACCTCATCTACTGCGTGGGACGCCGGAGCACCCTCTGCTTCCTAGCAGACTCTGTCTCACCCAGGT	Promoter (1-2kb)	1	18480930	18485974	5045	1	127707	ENST00000400664.3	1986	ENSG00000179023	KLHDC7A	kelch domain containing 7A	NA	NA	0	0.389207	0.704072	-23.6343	0.484642	0.84435	22.8724	0.210736	0.682531	-23.6343	0.501742	0.806744	-22.8359	0.523999	0.781216	-22.7655
chr1	19337034	19337333	300	chr1:19337034-19337333	4	CACCTGTGTGCCCTTGTAAAATCCAGTTTCAGCAATCCCTTGCTAAGTCAATTTTACAAAAACGGCCATCCTTGATATTTTTTTTCTTTTTTTGAGACAGGATCTCACTGTCTTCTAGGCTGGAGTACAGTGGTACGATCTCGGCTCACTGCAGCCTCAACCTCCCAGGCTCAAGTGATCCTCCCAACTCAGCCTCCCAAGTAGCTGGGACCACAGGTGCACACCACCACGCCTGGTTTGTATTTCTTGTAGAGATGGGGTCTATGTTAACCAGGCTAGTCTCAAAGCCCTGGGCTCAAG	Distal Intergenic	1	19339137	19346362	7226	2	832	ENST00000674299.1	9029	ENSG00000077549	CAPZB	capping actin protein of muscle Z-line subunit beta	0.353872	0.603103	-23.4157	NA	NA	0	0.184235	0.726107	-23.4157	0.456779	0.828721	22.5601	0.501742	0.806744	-22.4861	0.523999	0.781216	-22.4157
chr1	19666080	19666257	178	chr1:19666080-19666257	13	CTGCAGCGCCTCCATCCTCAACCTCTGCCTCATCAGCCTGGACCGCTACCTGCTCATCCTCTCGCCGCTGCGCTACAAGCTGCGCATGACGCCCCTGCGTGCCCTGGCCCTAGTCCTGGGCGCCTGGAGCCTCGCCGCTCTCGCCTCCTTCCTGCCCCTGCTGCTGGGCTGGCACGAG	Promoter (1-2kb)	1	19664875	19680966	16092	1	3362	ENST00000289753.2	1205	ENSG00000158748	HTR6	5-hydroxytryptamine receptor 6	0.152084	0.603103	25.2244	0.945411	0.951591	-0.560316	0.306975	0.726107	24.2609	0.717538	0.879899	-1.56032	0.0464076	0.476039	25.2244	0.596098	0.781216	0.30844
chr1	19666257	19666434	178	chr1:19666257-19666434	9	GCTGGGCCACGCACGGCCACCCGTCCCTGGCCAGTGCCGCCTGCTGGCCAGCCTGCCTTTTGTCCTTGTGGCGTCGGGCCTCACCTTCTTCCTGCCCTCGGGTGCCATATGCTTCACCTACTGCAGGATCCTGCTAGCTGCCCGCAAGCAGGCCGTGCAGGTGGCCTCCCTCACCACC	Promoter (1-2kb)	1	19664875	19680966	16092	1	3362	ENST00000289753.2	1382	ENSG00000158748	HTR6	5-hydroxytryptamine receptor 6	0.152084	0.603103	25.2244	0.945411	0.951591	-0.560316	0.306975	0.726107	24.2609	0.717538	0.879899	-1.56032	0.0464076	0.476039	25.2244	0.596098	0.781216	0.30844
chr1	20031299	20031450	152	chr1:20031299-20031450	1	AAAAGAGGGGATCGTGACTGATTTAAGAGGTAATGTATGAAGTTGACAAAGGGGGCCCTACTGCCAGAGGCTGGGGGTGGAGACTTAGAGTATCTCACAAAGAAGACAAAAGGAGATTTGAGTGGGAGAGAAATTTTGGAAGATACCCTGCA	Promoter (2-3kb)	1	20028571	20070414	41844	1	5322	ENST00000498348.1	2728	ENSG00000127472	PLA2G5	phospholipase A2 group V	0.68509	0.89172	0.668339	0.947893	0.953767	0.146273	0.784908	0.920979	0.511373	0.880282	0.940684	0.0913161	0.685945	0.838465	0.504648	0.976423	0.987893	0.130708
chr1	20394840	20394906	67	chr1:20394840-20394906	0	CTGCAGCCTCAACCTCCCAGGCTCAATCAATTCTCCTGGCTCAGCCTCCCAAGTAGCTAGGACTGCA	Intron (ENST00000426428.5/339505, intron 6 of 11)	1	20398099	20428772	30674	2	339505	ENST00000660748.1	33866	NA	LINC01141	long intergenic non-protein coding RNA 1141	0.329114	0.603103	20.7636	0.891077	0.951591	1.55168	0.203351	0.726107	22.9784	0.858173	0.940684	2.28511	0.983438	1	-2.00947	0.950293	0.986213	-0.30878
chr1	20430342	20430631	290	chr1:20430342-20430631	7	TCCCACAGAAGCACCCTCCCCATCAAATCCCCTTCCCCTGAAGGCTGTTAGGAGAAGGTGGTCGTGCCATCCATCCTCAGTCCTTGGGGACAGCCCAGACCTGCCCCAGGCTCCAAACAGGCTAGAATCAGCCCCGCTCTGCAGACGACCCAGTTGCTATAGGGCCTCCTGCTTCTGCCCACCCACCCCCGGTGAGGTGCCCATGGAGGGTCTTAGGCTGCTAAATCCCTCCCAGGGAGACCGTGGCGCCCCAGCGCCCTCTAGTGGTGGCAGGAAGAGTCTGTGGGGAG	Promoter (<=1kb)	1	20398716	20431234	32519	2	339505	ENST00000423486.1	603	NA	LINC01141	long intergenic non-protein coding RNA 1141	0.972134	1	1.74104	0.497092	0.783633	0.377432	0.690137	0.845217	0.777561	0.920918	0.940684	-0.622568	0.614107	0.806744	2.67065	0.197631	0.781216	1.24619
chr1	21814245	21814397	153	chr1:21814245-21814397	12	TTCTGAGATTGATTAATCATCCCCATTTTACCGATGAGGAAAATGAGGCTCAGAGAGGGCGAGTAACTCGCTTGGGATCACACAGCGGGCAGGGGACAGAGTAGAGTTCGGGGTCGCGCCGCGCGGCTCCAGTTTCCGTGCCTTCCGCTGCAG	Promoter (1-2kb)	1	21812363	21823963	11601	1	401944	ENST00000543870.1	1882	ENSG00000187942	LDLRAD2	low density lipoprotein receptor class A domain containing 2	0.73077	0.942323	0.124071	0.427323	0.73461	-0.869881	0.244455	0.726107	-0.839403	0.294698	0.682531	-1.14986	0.731233	0.864372	1.05368	0.611875	0.792271	-0.371349
chr1	21814397	21814549	153	chr1:21814397-21814549	20	GCCGACCTGGCGGAACTGTGCGGGCAGACGTGGCAGGGGGACGGGCTGCTGCTGCGCTCGCACGCCGCATCGCGCAGGTTCTACTTCGTGGCTCCGGACACCGACTGCGGGCTCTGGGTGCAGGCGGCAGCCCCCGGCGACCGGATCCGCTTC	Promoter (2-3kb)	1	21812363	21823963	11601	1	401944	ENST00000543870.1	2034	ENSG00000187942	LDLRAD2	low density lipoprotein receptor class A domain containing 2	0.800777	1	0.906167	0.427323	0.73461	-0.71988	0.271654	0.726107	-0.0573073	0.294698	0.682531	-1.21523	0.682605	0.838118	1.83578	0.611875	0.792271	-0.12618
chr1	21814549	21814701	153	chr1:21814549-21814701	16	CCAGTTCCGCTTCTTCCTGGTCTACAGCCTGACCCCCGCGCCCCCGGCGCTCAACACCTCCTCCCCGGCCCCGGCCGACCCGTGCGCCCCCGGCTCCTACCTGCAGTTCTACGAGGGCCCGCCGGGGGCGCCCCGGCCCCTGGGGTCCCCACT	Promoter (2-3kb)	1	21812363	21823963	11601	1	401944	ENST00000543870.1	2186	ENSG00000187942	LDLRAD2	low density lipoprotein receptor class A domain containing 2	0.800777	1	1.02331	0.427323	0.73461	-0.649014	0.271654	0.726107	0.0598375	0.294698	0.682531	-1.14437	0.682605	0.838118	1.95292	0.611875	0.792271	-0.067867
chr1	21879409	21879566	158	chr1:21879409-21879566	2	TCTACCCGACACCTTTGCAGGGATTTGGAGATGACAATGCTGCCCTGCTTGAGCCTTTTCTTCTGTCAGCTCCACAATCCCAGCTCTCGCCACTATTCCTAAGAAATAAGGTCCCACCCCAAGGGCTCTTCCCCCTAGAGTTGCCCTCTGCAGGCCAT	Promoter (<=1kb)	1	21877514	21879074	1561	2	3339	ENST00000480900.1	-335	ENSG00000142798	HSPG2	heparan sulfate proteoglycan 2	0.538498	0.803215	-0.192215	0.650754	0.941196	-1.78213	0.118085	0.726107	-1.15569	0.919719	0.940684	-0.461761	0.916042	1	0.737395	0.407243	0.781216	-1.88382
chr1	22015800	22015944	145	chr1:22015800-22015944	1	TGAGCTGCAGTTGTTTTAATATTATTGATCTCAAGGCCAGTGCTTGTTGAGCTGCTAGAGAAAAGGAAAAATCTCAGGCAGCTGGGAACGGTGGCTCATGACTATAATCCCAGCACTTTGGGAGGCTAGGGTAGGAGGACTGGAG	Intron (ENST00000650360.1/10136, intron 7 of 8)	1	22007450	22012539	5090	1	10136	ENST00000400271.2	8350	ENSG00000142789	CELA3A	chymotrypsin like elastase 3A	0.152084	0.603103	23.9566	0.205257	0.704072	-23.755	0.306975	0.726107	22.9932	0.070489	0.576841	-23.755	0.0464076	0.476039	23.9566	0.350384	0.781216	-22.8863
chr1	22015944	22016088	145	chr1:22015944-22016088	1	GGACTGCTTGAACCCAGGGGTTTGAGACCAGCCTGGGCAACATGGCAAAACCCCATCTTAGCTGGGTGGGGTGGCACATGCCTGTAGTCCCAGCTACTTGGGAGGCAGAGGTGGGAAGATCACTTGAGCCCGAGAGGTTGAGGCT	Intron (ENST00000650360.1/10136, intron 7 of 8)	1	22024558	22031223	6666	1	29092	ENST00000635675.2	-8470	ENSG00000218510	LINC00339	long intergenic non-protein coding RNA 339	0.152084	0.603103	23.9566	0.205257	0.704072	-23.755	0.306975	0.726107	22.9932	0.070489	0.576841	-23.755	0.0464076	0.476039	23.9566	0.350384	0.781216	-22.8863
chr1	22137593	22137749	157	chr1:22137593-22137749	2	AGGTTTGGGGAGCACTGTCTTGTCAGATGCTTGCTGTGTTGCTCAATTGCTAATCCAGGGCTGAGGGAAGAAAGTCAAACCATAGCAGACAGCTGGGTCGTGACTGCTGCCTGAGCAACCCCCTCGGGCAGAGCCTGGTCCTGGGGTGCTGCAGTGC	Intron (ENST00000290167.11/54361, intron 1 of 4)	1	22142850	22157401	14552	1	105376845	ENST00000648968.1	-5101	ENSG00000285873	LOC105376845	uncharacterized LOC105376845	0.353872	0.603103	-23.3649	NA	NA	0	0.184235	0.726107	-23.3649	0.456779	0.828721	22.5093	0.501742	0.806744	-22.4353	0.523999	0.781216	-22.3649
chr1	22137749	22137905	157	chr1:22137749-22137905	2	CTGGGGGAGAAACACTCAGCCTGGCTCTCAGGGTCTGTTCCGGCCCAGCAGTGAGGGGCAGAGCAGCAGATCGGGGGGGCAACAGACACACTTCCTGCCACCCACCTCTGTGCCTTTTAGTATCACCTGAGCCTCAGGGCAGTGGAGCAGAGCCTTC	Intron (ENST00000290167.11/54361, intron 1 of 4)	1	22142850	22157401	14552	1	105376845	ENST00000648968.1	-4945	ENSG00000285873	LOC105376845	uncharacterized LOC105376845	0.353872	0.603103	-23.3649	NA	NA	0	0.184235	0.726107	-23.3649	0.456779	0.828721	22.5093	0.501742	0.806744	-22.4353	0.523999	0.781216	-22.3649
chr1	23726684	23726973	290	chr1:23726684-23726973	1	AGGATGGTATGTGGCATCCCATTGGGGTATTAAAAGCCACCATAGACAGTGCTTCTGTCTTGAAAAAAAGGCACTGAACTGGTAACAGTGGTGAACATGAAGAGGGAATTGGTGGGGTTGGTGAAGTGGGGACTCACTCTGCAGAAGCTACTAGAGGCAGGCAGCCACCTGCCTTGCGAGATTCAAGCTGTGTTGTAAGACTGCTGGATTCAAATCTCAGTTCTGCCTCCAATTAGCTGTGTGGCCTTTGACTAGTCATGAACCTTCTGTGCCATAGTTTCCTCACAAGT	Intron (ENST00000655402.1/100506963, intron 2 of 2)	1	23743448	23762023	18576	1	6924	ENST00000609199.2	-16475	ENSG00000011007	ELOA	elongin A	0.152084	0.603103	23.0459	0.389207	0.704072	-21.3457	0.306975	0.726107	22.0824	0.753887	0.879899	0.143951	0.0464076	0.476039	23.0459	0.350384	0.781216	-21.9755
chr1	23743352	23743545	194	chr1:23743352-23743545	25	CTGCAGCCCACCGCCCCCCACACACCCCAGCCGAGGCCCGGAAGGGGCCAGGCGCGCTTCCGTCTCCGCCGGGGATGCACGGAGGGCGGAGCTGCGGCCCGAGGACGCGACGCGAGCCCAGTTCCGGCGAGGAGGCCGCGCCAGTGACAGCGATGGCGGCGGAGTCGGCGCTCCAAGTTGTGGAGAAGCTGCAG	Promoter (<=1kb)	1	23743448	23762023	18576	1	6924	ENST00000609199.2	0	ENSG00000011007	ELOA	elongin A	0.152084	0.603103	24.4236	0.205257	0.704072	-24.2219	0.203351	0.726107	23.5538	0.283631	0.682531	-4.62202	0.205398	0.681513	4.89765	0.244564	0.781216	-23.4469
chr1	24166363	24166623	261	chr1:24166363-24166623	2	TCCATTCTTCTTTTCTCTTTCACCTTTCTACACATCCTTCCTTCTTGTCTCTCCTTCCTTCCTTCCTTGCTTCTCCTTCGCTCCAGCCCTTCCTTCCCTGCCTGGATGTCCTGCTTTTCTTCTATACTATCTACCCACCCATCTCATCCACCCATCTGCCTTTTCTTCTGCCTTCTGTGATGGTTAAATTTTTTCTTTCTTTAAGACAGGGTGTTGCTCTGTCACCGAGGCTGGAATTCAATGGAACAATCATGGCTCACT	Intron (ENST00000327535.6/163702, intron 3 of 6)	1	24157130	24187248	30119	2	163702	ENST00000374421.7	20625	ENSG00000185436	IFNLR1	interferon lambda receptor 1	0.332208	0.603103	0.548349	0.565184	0.864029	0.839015	0.364903	0.82975	0.497529	0.26264	0.682531	0.987146	0.455972	0.806744	0.32148	0.960715	0.987893	0.22373
chr1	24550648	24550798	151	chr1:24550648-24550798	3	CTGCAGCCTCCACCTCCCAAGTTCAAGCGATTCTCCTGCCTCAGCCTCCTGAGTAGCTGGGATGACAGGCACCCGCCACCATGCCTGTCTAATTTTTGTATTTTTAGTAGAGACGGGGTTTCACTATGTTGCCTAGGCTGATCTCAGACTC	Intron (ENST00000577528.1/100506985, intron 2 of 2)	1	24538802	24556024	17223	2	100506985	ENST00000577528.1	5226	NA	NCMAP-DT	NCMAP divergent transcript	0.329114	0.603103	25.2754	0.389207	0.704072	-25.0738	0.306975	0.726107	24.8457	0.717538	0.879899	-1.88364	0.614107	0.806744	2.15928	0.350384	0.781216	-24.7388
chr1	26111868	26112139	272	chr1:26111868-26112139	16	CGGCCTGCAGAGCCCATGAGAGGGAGAAGCGGCAGCGTCTACCCTGAGGTAAATCTGGCCTTTCGGCGTGGCGGAGAGGTCTTGCTGCAGAGCCGATGGCCCTGCATGTGCCTCCCTCCCTGGGAGGCTTGTCACAGACGTGTCAGCGGAGTCATCCTGGGGAAGGCCCTGCGCTCCTCAGGCCACCGACCCCAGTCGCGGCCTCCTCTCATACCGGGGCCACCTCCCCCCGGCCCTCAGCCCCCAGCCCCGAGGAGTTGAGGCAACTGCAG	Promoter (<=1kb)	1	26111837	26125543	13707	1	149420	ENST00000374271.8	31	ENSG00000175087	PDIK1L	PDLIM1 interacting kinase 1 like	0.329114	0.603103	24.3583	0.891077	0.951591	0.342918	0.306975	0.726107	24.3616	0.753887	0.879899	-0.657081	0.614107	0.806744	1.06728	0.561579	0.781216	1.21167
chr1	26465814	26465956	143	chr1:26465814-26465956	0	ATCATGTTTCTGGTAGGAGGTGCCCTTCTCTGCCTGAGAGCAGCCCTCAGAAATGCATTCCTCATGCTGCTGACCTGGGCTGGCTGGTTGCAGCTTGGGGAAGGACTTTTCATTGGCTAATGTTTTGAAGCCAAGGACCTGCA	Promoter (1-2kb)	1	26462756	26467282	4527	2	101928324	ENST00000423060.1	1326	NA	DHDDS-AS1	DHDDS antisense RNA 1	0.329114	0.603103	23.7467	0.123414	0.704072	24.7933	0.306975	0.726107	23.7558	0.27781	0.682531	23.7933	0.614107	0.806744	1.05541	0.0361852	0.781216	24.7933
chr1	27006002	27006157	156	chr1:27006002-27006157	10	ACGTAGTAATTGACAGTGGCTGGCACAACCCCGTCAGTGCCTGGAGGGCGCCAGGCCAGGGCGGCAGTGGCAGCTGGGCCCTGCTCAGCCAGTGCCTGCAGCGCCAGTGCGGCAATGAGGTCCAGCGTCTGGCGGCGCTCGTGGTTCATGAGGCAC	Exon (ENST00000289166.6/115572, exon 2 of 2)	1	27005020	27012850	7831	2	115572	ENST00000289166.6	6693	ENSG00000158246	TENT5B	terminal nucleotidyltransferase 5B	0.972134	1	0.130251	0.197088	0.704072	5.20846	0.693404	0.845217	-0.526564	0.567181	0.879899	4.20846	0.771736	0.884174	0.741546	0.0479313	0.781216	6.07721
chr1	27006157	27006312	156	chr1:27006157-27006312	12	CACGGTGCTCTCGTTGACCACCCGGTGCAGTGTCACCAGGCAGGCGTAACGGCGGGCTGCATCTGCCCCACCGAAGTGGGCCTCCAGGTAGCGCTCTAGGGTGCGCCGCTGCTCCACCAGGTCTGGAAAGTCGATGAAGAAGCGGGAGCACATGTA	Exon (ENST00000289166.6/115572, exon 2 of 2)	1	27005020	27012850	7831	2	115572	ENST00000289166.6	6538	ENSG00000158246	TENT5B	terminal nucleotidyltransferase 5B	0.353872	0.603103	-24.4086	0.428214	0.73461	4.44703	1	1	-3.09181	0.858173	0.940684	3.44703	0.22065	0.681513	-23.7633	0.170235	0.781216	5.31578
chr1	27006312	27006467	156	chr1:27006312-27006467	15	AGCGCTGCAGGGCGCGCACATCGGTGCTGGGCCGGGGCCGGAAGCCCCGCACCAGGAGGTGGCAGTACTTGAGGAGGCCACCACCTCGGATCTCCTCGGGACTGCGCGTGGCGATGACACGGTGCCGCAGGTGCTCCAGGGCCTCGGTGAAGTCCC	Exon (ENST00000289166.6/115572, exon 2 of 2)	1	27005020	27012850	7831	2	115572	ENST00000289166.6	6383	ENSG00000158246	TENT5B	terminal nucleotidyltransferase 5B	0.353872	0.603103	-24.4086	0.428214	0.73461	4.44703	1	1	-3.09181	0.858173	0.940684	3.44703	0.22065	0.681513	-23.7633	0.170235	0.781216	5.31578
chr1	27152231	27152390	160	chr1:27152231-27152390	1	CTGCAGGGACAAACTTCTGACTGCCTAGAGTGGGGTCTCTGCAGTCATGCTGTCATCCCACCAGCAGCCACTGACACTCAAAGTGTGTCTGCCAGCCCTGAATGCCCTAATGTAATGCCAGGTGTGGTGGGCAGGTGAGGGGATCGGGGACAGGAGGCAA	Promoter (2-3kb)	1	27105451	27154598	49148	2	6548	ENST00000374086.3	2208	ENSG00000090020	SLC9A1	solute carrier family 9 member A1	0.329114	0.603103	23.8108	0.945411	0.951591	0.149746	0.484642	0.84435	22.8473	0.717538	0.879899	-0.850254	0.167938	0.681513	23.8108	0.596098	0.781216	1.0185
chr1	27349463	27349665	203	chr1:27349463-27349665	19	GGGGGAGAGCAGGAGCCGCGGCCCCAGCAAGCCCAGGTAGGCGGGAGTGGCCCGTGGCTGCTCTCAACATCCGGAGCGGACTCCGGGCGGGGAGCGCTCCTGCCCAGGGCTGCGAGCCGCCCGCGACCCAGGGCGCTCGGGGCAGGGGTGGGGAAAGAAGGGGCGCCCCGTCACTTGCCCCCTCTGCAGACCAAGGCCGCGTC	Promoter (<=1kb)	1	27349476	27351545	2070	1	84958	ENST00000496001.5	0	ENSG00000142765	SYTL1	synaptotagmin like 1	0.329114	0.603103	24.1161	NA	NA	0	0.484642	0.84435	23.1526	0.456779	0.828721	23.1901	0.167938	0.681513	24.1161	0.523999	0.781216	-23.0457
chr1	27349665	27349867	203	chr1:27349665-27349867	17	CCCAGATCCTGGAGAATGGGGAGGAGGCCCCGGGGCCCGACCCCTCTCTCGACCGCATGCTCAGCAGCAGCTCCTCGGTGTCCAGCCTTAACTCCTCCACGGTGAGGCGGGAGGGAGGGGACCCGGGCGGCCGGGGGGTGGACCCGTTCCGATGCGTAGCCCCTGCCTGCCCCTCCCTCGCCGCGGGACCCACCGCTGCAGCC	Promoter (<=1kb)	1	27349747	27351579	1833	1	84958	ENST00000485269.1	0	ENSG00000142765	SYTL1	synaptotagmin like 1	0.329114	0.603103	24.7376	NA	NA	0	0.484642	0.84435	23.7741	0.456779	0.828721	23.8116	0.167938	0.681513	24.7376	0.523999	0.781216	-23.6672
chr1	27351140	27351342	203	chr1:27351140-27351342	17	TCTGCCCCTGCAGGCCCCGCCGTCTCTTCTAGCCGCACCCCATCCGGGTCTGCAGACCCCACCCTCCTGAGGCCCCTTTCCATTAGCCCCTGCTCCACGATAAGCCCGCCTCTCGCAGGTCCCACCCTCTCCCGACGACCTTCCGAGCCGCGGGTTACTCGCCCTGTCCCTCAAGTACGTCCCCGCCGGCTCCGAGGGTGAGT	Promoter (<=1kb)	1	27351075	27353937	2863	1	84958	ENST00000615284.1	65	ENSG00000142765	SYTL1	synaptotagmin like 1	0.353872	0.603103	-23.9498	NA	NA	0	0.690137	0.845217	0.12882	0.27781	0.682531	24.6938	0.325495	0.704731	-24.6198	0.350384	0.781216	-24.5494
chr1	27356612	27356902	291	chr1:27356612-27356902	16	GGCTCAGCTGCACCATCAGAGGAGCGGGGCCCTGCTCGGGCTCCACCGGAAGCGGGCTCTGCTGGCCTGGGCTCTGCTGGGAGTCCCCTTCATTACTCAGCTCCTCTGACCTCGGTGAGACCGCCTCCTTCTCCACCTCTGCAGCCCAGTGCGGTGAACTCAGGCAAGGCTACAACGCCCGTTTGGGAACCCCAGACCCCAAAGTGCGGGGGTAGGGTGCCCGGCTCTGGGCAGGCCCCAGGCGGTGCCGGTATGGGAGATGTCCATTTAGTCACGCCCCCACCGGCGCCT	Promoter (<=1kb)	1	27355184	27356471	1288	2	9064	ENST00000486046.5	-141	ENSG00000142733	MAP3K6	mitogen-activated protein kinase kinase kinase 6	0.353872	0.603103	-23.6255	0.205257	0.704072	-25.5526	0.690137	0.845217	0.769191	0.070489	0.576841	-25.5526	0.325495	0.704731	-24.7542	0.350384	0.781216	-24.6839
chr1	27356968	27357117	150	chr1:27356968-27357117	9	ACACCCTCGCTGGCAGGAGGCCCGTGGCATTCCCCTCCTACCCGGTCCTAGCACACCCAGGGCTGCCCGCACAGCACGGCTGAGCAGTGAGTCCAGAACGAACATCCAGTGTGGACGGATCTGGCGCTTGCGGAGGATCTGCTTCACCTG	Promoter (<=1kb)	1	27355356	27357167	1812	2	9064	ENST00000470890.1	50	ENSG00000142733	MAP3K6	mitogen-activated protein kinase kinase kinase 6	0.353872	0.603103	-23.6255	0.205257	0.704072	-25.5526	0.690137	0.845217	0.769191	0.070489	0.576841	-25.5526	0.325495	0.704731	-24.7542	0.350384	0.781216	-24.6839
chr1	27357117	27357266	150	chr1:27357117-27357266	6	GCAGGGGGAGGGAGGCGCCGCTGAGACAGCTGAGCCTCAACTAGAGGCAGGGCTTGAGTTGGAAAGGCCTAGAAAGTCTTCGGCGGGAGGCGAGTGGGGTGGGCGGGCTTGAGGTCCAGGGAAGGCCTGGGAAGCTAGGACTGGGCAGAC	Promoter (<=1kb)	1	27355356	27357167	1812	2	9064	ENST00000470890.1	0	ENSG00000142733	MAP3K6	mitogen-activated protein kinase kinase kinase 6	0.353872	0.603103	-22.4031	0.205257	0.704072	-24.5939	0.690137	0.845217	1.10706	0.070489	0.576841	-24.5939	0.325495	0.704731	-23.7955	0.350384	0.781216	-23.7251
chr1	27597713	27597902	190	chr1:27597713-27597902	0	TCCAGATTCTCATCAAATCCCTGTTTGTGGTTTGCAGCCTGCAGTCTTCTCCCTCCCTCTCCCTCCCTCTCTCTGTCTGTCTGGGTTTCCCCCTTTCTTTATCTCTTCCTGTCTCTCAGCCTCCCCATCTCTCTCCTTCTCCATCTCAGTCACTCTGTCTCCTTTCTTTTCTCTAAGTCTCTGTCTTCCA	Intron (ENST00000247087.10/27245, intron 1 of 5)	1	27552496	27603414	50919	2	27245	ENST00000490295.2	5512	ENSG00000126705	AHDC1	AT-hook DNA binding motif containing 1	0.939438	1	0.860767	0.134962	0.704072	-2.26001	0.871577	0.993382	0.651032	0.0161944	0.576841	-3.26001	0.731233	0.864372	0.661604	0.424512	0.781216	-1.39126
chr1	27597996	27598147	152	chr1:27597996-27598147	1	GTGGGTGTCTCTGTCCATCTGTTTCACCACCCATCTGTCTGGCTGTCTGTGTTAGTCCTTCCAAGGGTGCCCACTCGCTCCCCAAGGCACCCTCCCCCAGGTCAGCAAGGCCTCTCCTGGCTCAGGGGGTGGGGAGGGGGTGCAGAGCTGCA	Intron (ENST00000247087.10/27245, intron 1 of 5)	1	27552496	27603414	50919	2	27245	ENST00000490295.2	5267	ENSG00000126705	AHDC1	AT-hook DNA binding motif containing 1	0.939438	1	0.81292	0.134962	0.704072	-2.27292	0.871577	0.993382	0.571632	0.0161944	0.576841	-3.27292	0.731233	0.864372	0.681111	0.424512	0.781216	-1.40417
chr1	28314948	28315242	295	chr1:28314948-28315242	18	AGCTGCAGCTCTTTTTTTTTTTTTTTTTTTTTTTTGAGATGGAGTCTGGCTCTGTCGCCCAGGCTGGAGTGCAGTAGCGCCATCTCGGCTCACTGCGAGCTCCACCTCCCAGGTTCACGCCATTTTCCTGCCTCAGCCTCCCGAGCAGCTGGGACTGCAGGCGCCGGCCACCGCGCCCGGCTAATTTTTTTGTATTTTTAGTAGAGTCGGGGTTTCTCCGTGGTCTCGATCTCCTGACCTCGTGATCCGCCCGCCTCGGCCTCCCAAAGTGCTGGGATTAGCAAGCTGCAGCTCT	Distal Intergenic	1	28329002	28335016	6015	1	54797	ENST00000479574.5	-13760	ENSG00000130772	MED18	mediator complex subunit 18	1	1	-0.833079	0.945411	0.951591	-0.90982	1	1	-1.2708	0.889459	0.940684	0.48368	1	1	-0.208045	0.983422	0.987893	-1.5624
chr1	29276085	29276241	157	chr1:29276085-29276241	0	TGGACTGTATTTTTTAAGGAATTTGTTCATTACACCTAAATTGTCAAATTTCTTGAGATAATGTTGTTTATAATTTTTTTTATTTATTTAGAGACAGAGTCTTGCTCTGTTGCCCAGGCTGGAGTACAGTGGCACCATCTCAGTTTGCTGCAGCCTC	Intron (ENST00000345512.7/10076, intron 8 of 30)	1	29279551	29312706	33156	1	10076	ENST00000415600.6	-3310	ENSG00000060656	PTPRU	protein tyrosine phosphatase receptor type U	0.329114	0.603103	24.4453	0.945411	0.951591	-3.29212	0.306975	0.726107	24.1208	0.920918	0.940684	-1.36481	0.614107	0.806744	1.84378	0.983422	0.987893	-3.06231
chr1	29276241	29276397	157	chr1:29276241-29276397	2	CCTCCTCCCAGGCTCAAGCGATCCTCCCACCTCAGCCTCCTGAGCTGGGACTACAGGCATGCACCACCACGCCAAGCTAGTTTATTTATTTTTGAGGCAGGGACTCACACTTTTGTCCAGGTGGGAGTGCAGTGTCATGATTATGGCTCACTGCAGC	Intron (ENST00000345512.7/10076, intron 8 of 30)	1	29279551	29312706	33156	1	10076	ENST00000415600.6	-3154	ENSG00000060656	PTPRU	protein tyrosine phosphatase receptor type U	0.329114	0.603103	24.4453	0.945411	0.951591	-3.29212	0.306975	0.726107	24.1208	0.920918	0.940684	-1.36481	0.614107	0.806744	1.84378	0.983422	0.987893	-3.06231
chr1	30383104	30383288	185	chr1:30383104-30383288	1	CTGGGTTTCCCCTATTGGTGCTGGCCAGGGGTTCTATACAGCACCCTGTTTGCCATAGATGCTTTGAGTATGGTGAAATCTGCTGGGTCATAAGCTCCAAGTGGTGGAGCAGCTTGTGCCGCAGTCTGAATGAACTTGCTGCAGAGCCTTCTCCTGATCTGGTTTCCACTCAAAGCTAACAGCCC	Distal Intergenic	1	30713767	30716135	2369	2	4146	ENST00000494561.1	332847	ENSG00000162510	MATN1	matrilin 1	0.349872	0.603103	-0.456162	0.632999	0.941196	0.0776544	0.212264	0.726107	-0.640446	0.681755	0.879899	-0.238039	0.536296	0.806744	-0.108792	0.649543	0.823014	0.333724
chr1	30383288	30383472	185	chr1:30383288-30383472	3	CCTCCCTGGGGCAGCAGGCCCCTGCGTTATCGTGGGACTGGTTTCCCACACTCTACTTGGCATCTGTTTTACCAGGGAATCTGATGTGCTTGCTACATCCTGTTCCTGGGATCCAATCCACATGTGATTAATGTAGGAGACCAGTGTGCATTTTGTAAAATGTACAGACAAGCAAGTTCGCTGCA	Distal Intergenic	1	30713767	30716135	2369	2	4146	ENST00000494561.1	332663	ENSG00000162510	MATN1	matrilin 1	0.349872	0.603103	-0.49034	0.632999	0.941196	0.459148	0.212264	0.726107	-0.482354	0.681755	0.879899	0.0598664	0.536296	0.806744	-0.284419	0.649543	0.823014	0.66203
chr1	30438539	30438704	166	chr1:30438539-30438704	1	CCTGCCACTGCCCAGGCTTGATTAGGCAAACAAAGCAGCCGGGAAGCTCAAACTGGGTGGAGCCCACCACAGCTCAAGGAGGCCTGCCTGCCTCTGTAGGCTCCACCTCTGGGGGCAGGGCACAGACAAACAAAAAGACAGCAGTAACCTCTGCAGACTTAAATGT	Distal Intergenic	1	30713767	30716135	2369	2	4146	ENST00000494561.1	277431	ENSG00000162510	MATN1	matrilin 1	0.0672654	0.603103	0.0102411	0.124455	0.704072	-3.83191	0.00419187	0.726107	-0.953233	0.0966115	0.682531	-3.45357	0.30458	0.704731	0.939852	0.22709	0.781216	-3.09119
chr1	30438704	30438869	166	chr1:30438704-30438869	3	TCCCTGTCTGACAGCTTTGAAGAGAGCAGTGGTTCTCCCAGCACGCAGCTGGAGATCTGAGAACGGGCAGACTGCCTCCTCAAGTGGGTCCCTGACCCCTGACCCCCGAGCAGCCTAACTGGGAGGCACCCCCCAGCAGGGGCACACTGACACCTCACACAGCAGG	Distal Intergenic	1	30713767	30716135	2369	2	4146	ENST00000494561.1	277266	ENSG00000162510	MATN1	matrilin 1	0.102436	0.603103	-2.64182	0.124455	0.704072	-2.94673	0.0104637	0.726107	-3.60529	0.0423552	0.576841	-3.25215	0.382398	0.795471	-1.71221	0.304389	0.781216	-2.17054
chr1	30438869	30439034	166	chr1:30438869-30439034	0	GGTACTCCAACAGACCTGCAGCTGAGGGTCCTCTCTGTTAGAAGGAAAACTAACACAGAAAGGACATCCACACCAAAAACCCATCTGTACATCACCATCATCAAAGACCAAAAGTAGATAAACCCACAAAGATGTGGAAAAAACAGAACAGAAAAACTGGAAACTC	Distal Intergenic	1	30713767	30716135	2369	2	4146	ENST00000494561.1	277101	ENSG00000162510	MATN1	matrilin 1	0.183345	0.603103	-2.27139	0.208436	0.704072	-2.6076	0.0302966	0.726107	-3.23487	0.103737	0.682531	-2.91302	0.523538	0.806744	-1.34178	0.407243	0.781216	-1.85497
chr1	31755822	31755987	166	chr1:31755822-31755987	3	TCAAGAGTGAGGTCTCACTGCCATGCATTTTGGTGACCGCAACATTTGGACAAGGCTCAGCAGAGGGGTGACATCAGTGAACAGCTACATGCATGGCCGAGGATCTGCCAGGATGGACACCAGGGACACTGTCAGCCCCTGCAGACCCCGCCCCACCCAGGCCCTG	Promoter (<=1kb)	1	31739515	31756264	16750	2	576	ENST00000530134.5	277	ENSG00000121753	ADGRB2	adhesion G protein-coupled receptor B2	0.583211	0.813605	0.206011	0.123414	0.704072	23.9943	1	1	-0.757463	0.114587	0.682531	24.131	0.236697	0.690204	1.13562	0.414159	0.781216	0.882798
chr1	31755987	31756152	166	chr1:31755987-31756152	6	GCTGAGACTCACCATATCTCATCTCGGTTGTGAACAGATCATTGCTGCTCCCCGAGTGCAAATCGGCCTCAGCAGGTGGGGCTGGGCCCCCGGGCACCAGGGCATTGGACAGGGTGTGGGCAGCAGGAGGGCCTGGAGATGTGGTGGTGGTGGAGCCGGCCCCCGC	Promoter (<=1kb)	1	31739515	31756264	16750	2	576	ENST00000530134.5	112	ENSG00000121753	ADGRB2	adhesion G protein-coupled receptor B2	0.583211	0.813605	0.206011	0.123414	0.704072	23.9943	1	1	-0.757463	0.114587	0.682531	24.131	0.236697	0.690204	1.13562	0.414159	0.781216	0.882798
chr1	31756152	31756317	166	chr1:31756152-31756317	9	CCTCTCCAGGGCAGCTGCAGCCTGGCTGAGCAAAGCCGCAGGCCCTGCCGGCAGCGCGGCCACACTCCTCACTCCAGCGGCAGAGCACACCACAGGTGAATTGGCTAGAGTTGTTGTTGTTGATGAGCAAGACCTCGACAAAGCGGAAGGCTAGGGCAGCGGGCGC	Promoter (<=1kb)	1	31739515	31756264	16750	2	576	ENST00000530134.5	0	ENSG00000121753	ADGRB2	adhesion G protein-coupled receptor B2	0.583211	0.813605	0.206011	0.123414	0.704072	23.8076	1	1	-0.757463	0.114587	0.682531	24.0491	0.236697	0.690204	1.13562	0.414159	0.781216	0.696153
chr1	32058947	32059238	292	chr1:32058947-32059238	4	AGGAGTTTGAGACCAGCCTGGCCATCATGGTGAAACCCCATCTCTACTAAAAATACAAAAATTAGCTGGGCATGGTGGTGCGTGCCTGTAATCCCGGCTACTTGGGAGCCTGAGGGAGGAGAATCACTGGAACCCAGAAGGCAGAGGCTGCAGTACTGGAGCTAAGATTATGCCCCTGCACTCCAGCCTGAGTGACAGAGCGAGACTCTGTCTCAGGAGAAAAAAAAAAAAAAAAAAACAAAACCTTTTAGGCGATAGAATGAACATATTAAGGCTCCAGGTTACTGACTGG	Intron (ENST00000484270.2/10657, intron 10 of 10)	1	32072031	32102863	30833	1	55116	ENST00000487305.5	-12793	ENSG00000121775	TMEM39B	transmembrane protein 39B	0.759569	0.975853	-0.351725	0.89235	0.951591	-0.127662	0.714685	0.863081	-0.463429	0.795057	0.91745	-0.455916	0.853273	0.956926	-0.100711	0.609314	0.792271	0.20665
chr1	32258741	32258965	225	chr1:32258741-32258965	6	TTGCAGTGAGCTGAGATCACGTCACTGCACTCCAGCCTGGGCAACAGTGCGAGACTCCGTCTCAAAAAAAAAAAAAAAAAAAACCCAGCCTGTGTGACGTGGTGAGACCCTGTCCCTACTAAAAATACAAAAATTATCCAGGCGTGGTGTTGCCCACCCATAGTGCCAGCTACTCAGGAGGCTGAGGTAGGAGGATCACCTGAGCTATGGGAGGTCGAGGCTGCA	Intron (ENST00000696990.1/3932, intron 1 of 5)	1	32251318	32286160	34843	1	3932	ENST00000469765.5	7423	ENSG00000182866	LCK	LCK proto-oncogene, Src family tyrosine kinase	0.329114	0.603103	22.7376	0.389207	0.704072	-23.1963	0.306975	0.726107	23.1417	0.717538	0.879899	-1.38469	0.649975	0.806744	0.339672	0.350384	0.781216	-23.0348
chr1	32771790	32771940	151	chr1:32771790-32771940	10	AGGGAGGACGTAGGTGCGCCCCTGGTCACGCCCTCGCTCCTGCAGATGGTGCGGCTGCGCTCCGTGGGTGCTCCAGGAGGGGCTCCCACCCCAGCACTGGGGCCATCGGCCCCCCAGAAACCACTGCGAAGGGCCCTGTCAGGGCGGGCCA	Exon (ENST00000401073.7/57648, exon 6 of 7)	1	32765667	32774970	9304	1	57648	ENST00000373480.1	6123	ENSG00000162522	KIAA1522	KIAA1522	0.353872	0.603103	-24.2722	0.389207	0.704072	-24.272	0.690137	0.845217	-0.76205	0.717538	0.879899	-0.855401	0.325495	0.704731	-24.4096	0.350384	0.781216	-24.3392
chr1	32771940	32772090	151	chr1:32771940-32772090	7	AGCCCAGTGCCTGCCCCCTCCTCAGGGCTCCATGCTGCGGTCCGACTCAAGGCCTGCAGCCTGGCCGCCAGTGAAGGCCTCTCAAGTGCTCAGCCCAACGGACCGCCTGAGGCAGAGCCACGGCCTCCCCAGTCCCCTGCCTCAACGGCCA	Exon (ENST00000401073.7/57648, exon 6 of 7)	1	32765667	32774970	9304	1	57648	ENST00000373480.1	6273	ENSG00000162522	KIAA1522	KIAA1522	0.353872	0.603103	-24.2722	0.389207	0.704072	-24.272	0.690137	0.845217	-0.76205	0.717538	0.879899	-0.855401	0.325495	0.704731	-24.4096	0.350384	0.781216	-24.3392
chr1	33325237	33325532	296	chr1:33325237-33325532	6	TTCCCCTGTTCAGACCCCTGCTCCATGAACTGGGCGGACCCATGTCCACTAAAGTGCTGAGGAAGTGACAGCGTGTGATTTCTGAGGCTAGATCATAAAGGGCACAGCAGTTCTCACCTCACTCTTCTGCCTGGGTTACTGCAGAGTAAGCCAGCTACCAGTAAGCCACCCCAGCAACCCTTTGGAGAGGCATGCGTGGAGAGCAGCCAAGGCCCTGGTGGTCCCCGGCCTCCTTGCCGTGTGAGTGAACCGTGCTGGAAGTGGGTTTTCTGGCTCCAGACCTCAGACACTGCAGC	Exon (ENST00000627421.1/ENST00000627421.1, exon 2 of 2)	1	33306766	33321098	14333	2	127550	ENST00000442999.3	-4139	ENSG00000184389	A3GALT2	alpha 1,3-galactosyltransferase 2	0.384517	0.642285	0.992172	0.146142	0.704072	-1.57914	0.738686	0.879942	0.280607	0.0545476	0.576841	-1.99044	0.172507	0.681513	1.47666	0.331653	0.781216	-0.898548
chr1	33945818	33945965	148	chr1:33945818-33945965	1	CCGACAGCACCCTAGCCCAGGGATGATCAAATATATCTAGACAGAAAAACACATGGAAAATAAGTGGTACCCTATGGTGAAACATGGCTAAATACTGTTAGTATTAGGCTTAGAATAGCTAAATATGCAATTTGAGGCTAAATTTGAT	Intron (ENST00000373381.9/114784, intron 3 of 70)	1	33875466	33885423	9958	1	402779	ENST00000431046.1	70352	ENSG00000231163	CSMD2-AS1	CSMD2 antisense RNA 1	0.329114	0.603103	24.1072	0.891077	0.951591	0.753827	0.203351	0.726107	24.7109	0.889459	0.940684	0.248772	1	1	0.0268624	0.917251	0.986213	0.971718
chr1	33945997	33946286	290	chr1:33945997-33946286	2	CGGTGTGTTCTATGATACACTGGCTGAGAAATAAACTTAATAAGAAAAACATTCAGTGTGTCAGGTAATTTTAAAAAATACAACAGAAACTCCCTCCCTCTTGAAGAAACCAGTGCTCACAAGTTTATCTGAGAGTTTCTGCAGGAGAAACCTGCTTAACCTTGCTTAATCCAGAATTTCCAAAAATTTGACTACATAATCACTGCCCTGACTTTGGAACTTTACTCTCAGTAATGCCTAATAAACTCTGAATTGTTCTGCGAAACACATTTTGGGAGGTGTTGGATTCT	Intron (ENST00000373381.9/114784, intron 3 of 70)	1	33875466	33885423	9958	1	402779	ENST00000431046.1	70531	ENSG00000231163	CSMD2-AS1	CSMD2 antisense RNA 1	0.329114	0.603103	24.1072	0.891077	0.951591	0.753827	0.203351	0.726107	24.7109	0.889459	0.940684	0.248772	1	1	0.0268624	0.917251	0.986213	0.971718
chr1	34092981	34093157	177	chr1:34092981-34093157	2	GTAACCTCTGCAGACTTAAATGTCCCTGTCTGACAGCTTTGAAGAGAGCAGTGGTTCTCCCAGTACGCAGCTGGAGATCTGAGAACTGGCAGACTGCCTCCTCAAGTGGGTCCCTGACCCCTGACCCCCGAGCAGCCTAACTGGGAGGCACCCCCCAGCAGGGGCACACTGACACCT	Intron (ENST00000373381.9/114784, intron 1 of 70)	1	33513998	34165230	651233	2	114784	ENST00000373381.9	72073	ENSG00000121904	CSMD2	CUB and Sushi multiple domains 2	0.613782	0.832172	0.913472	0.822274	0.951591	0.608198	0.759761	0.89706	0.366304	0.777698	0.901905	0.343694	0.564198	0.806744	1.16495	0.910383	0.986213	0.599318
chr1	34093157	34093333	177	chr1:34093157-34093333	1	TCACACTGCAGGGTACTCCAACAGACCTGCAGCTGAGGATCCTGTCTGTTAGAAGGAAAACTAACAAACAGAAAGGACATTCACAACAAAAACCCATCTGTACATCGCCATCATCAAAGACCAAAAGTAGATAAAACCACAAAGATGGGGAAAAAACAGAACAGAAAAACTGGAAAC	Intron (ENST00000373381.9/114784, intron 1 of 70)	1	33513998	34165230	651233	2	114784	ENST00000373381.9	71897	ENSG00000121904	CSMD2	CUB and Sushi multiple domains 2	0.613782	0.832172	0.913472	0.822274	0.951591	0.608198	0.759761	0.89706	0.366304	0.777698	0.901905	0.343694	0.564198	0.806744	1.16495	0.910383	0.986213	0.599318
chr1	34571165	34571341	177	chr1:34571165-34571341	2	GAGTTTCCAGTTTTTCTGTTCTGTTTTTTCCCCATCTTTGTGGTTTCATCTACTTTTGGTCTTTGATGATGGTGATGTACAGATGGGTTTTCGGTGTAGATGTCCTTTCTGGTTGTTAGTTTTCCTTCTAACAGACAGGACCCTCAGCTGCAGGTCTGTTGGAATACCCTGCCGTGT	Distal Intergenic	1	34669599	34669694	96	2	693137	ENST00000385206.1	98353	ENSG00000207941	MIR552	microRNA 552	0.436156	0.717416	0.88774	0.588283	0.895262	0.8418	0.523669	0.845217	0.783312	0.785075	0.906915	0.460051	0.478515	0.806744	0.533951	0.505451	0.781216	0.868879
chr1	34571341	34571517	177	chr1:34571341-34571517	3	TGAGGTGTCAGTGTGCCCCTGCTGGGGGGTGCCTCCCAGTTAGGCTGCTCGGGGGTCAGGGGTCAGGGACCCACTTGAGGAGGCAGTCTGCCCGTTCTCAGATCTCCAGTTGCGTGCTGGGAGAACCACTGCTCTCTTCAAAGCTGTCAGACAGGGACACTTAAGTCTGCAGAGGTT	Distal Intergenic	1	34669599	34669694	96	2	693137	ENST00000385206.1	98177	ENSG00000207941	MIR552	microRNA 552	0.436156	0.717416	0.88774	0.588283	0.895262	0.8418	0.523669	0.845217	0.783312	0.785075	0.906915	0.460051	0.478515	0.806744	0.533951	0.505451	0.781216	0.868879
chr1	35428235	35428309	75	chr1:35428235-35428309	0	ATTTTTTTTTTTTGAGACAAGGTGTTGCTCTGTCACCTAGGCTGGAGCTCAGTGGCATAATCATGGCTCACTGCA	Intron (ENST00000697000.1/79932, intron 19 of 21)	1	35442267	35443255	989	2	79932	ENST00000473423.1	14946	ENSG00000142687	KIAA0319L	KIAA0319 like	0.0714139	0.603103	2.86517	0.815326	0.951591	-1.27816	0.156641	0.726107	2.2792	0.395448	0.814416	-1.77872	0.0631933	0.578892	2.17397	0.740012	0.906695	-0.599574
chr1	35437226	35437377	152	chr1:35437226-35437377	6	CTGCAGCGCGGCACTTCTCCGGGCCATCACCGCCCGTTTCTCCCCTCCTGCCTCAGAAGAGGCATCTGAACTCCATGCTCCCTTTCTCTCCTCTCTTCCCTTCTCCCTCCTTCCTCCTCAGTCAGGAAGCACCTCTCCAACGCACCACTCCT	Intron (ENST00000697000.1/79932, intron 19 of 21)	1	35442267	35443255	989	2	79932	ENST00000473423.1	5878	ENSG00000142687	KIAA0319L	KIAA0319 like	0.972134	1	0.808251	0.205257	0.704072	-24.4244	0.690137	0.845217	-0.155223	0.070489	0.576841	-24.4244	0.614107	0.806744	1.73786	0.350384	0.781216	-23.5557
chr1	35437438	35437738	301	chr1:35437438-35437738	4	GAGGCCCTTGCCCTCTGCCTGCCATCCTGCTTCTCTAGCTTTCACTGCTCAGCTTCTAAAAGGATTTTTAAATATTCAGGGCCTTCATCTCCTCACTGCGCTTTCTAAATCACCTGCGCTTTCACTTCCACTGTCACTCCCCACTCTACTGCAGCTCTCTGATGGGCCAGGAGCTTCTCTGGTGCTATCAATTCTGATTCTTTGGCCTTTGCAGCAGCAAACACCGACGGCTGTCCCCTAATGAATCCCCTCCTCCCTCCTGGATGGTCATTCTTGGGGTCCTCAACCCTAGGCCTCTTCT	Intron (ENST00000697000.1/79932, intron 19 of 21)	1	35442267	35443255	989	2	79932	ENST00000473423.1	5517	ENSG00000142687	KIAA0319L	KIAA0319 like	0.972134	1	0.933782	0.205257	0.704072	-24.5042	0.690137	0.845217	-0.0296917	0.070489	0.576841	-24.5042	0.614107	0.806744	1.86339	0.350384	0.781216	-23.6354
chr1	35707620	35707920	301	chr1:35707620-35707920	18	CCCTCACCCTGAGAGCTGTCACTGAATGTTGGGGGCCGGTGCTAATTCGCACCACTCAAGAACACACCCACAAACCCAGTCCCACCACCAGGTTCCCACCCCAACACCCTACCCGCAGCAGCCCTCTCCTCCGTGCTCCCACCCCGCCCTGCAGACCCGGGTTAATCCTCCCCTCCCTGCTTTGTGCGCCCTCGCGCCTGAGGCCAAAGCCCTGGGCGGCGCGGGCGCTCCCGGCAGCTGAGGTGGCGGGGCGGGGGCCGCGGGGGAGGAGACACAAAAGGGGGAGGGGCCCAGGCTGCAG	Distal Intergenic	1	35716160	35716911	752	2	127703	ENST00000503824.1	8991	ENSG00000142686	C1orf216	chromosome 1 open reading frame 216	0.329114	0.603103	25.6677	0.389207	0.704072	-25.4661	0.484642	0.84435	24.7042	0.210736	0.682531	-25.4661	0.167938	0.681513	25.6677	0.523999	0.781216	-24.5973
chr1	36084862	36085160	299	chr1:36084862-36085160	10	CTCTGCAGGTGGTGTCTGTGAACAGGCCTAGGGGTTTCTGACCCTTCTGGTTTCTGTGCCATGGCCACGCTGAGCGTCAAGCCAAGTCGGCGCTTCCAGCTGCCCGACTGGCACACTAACAGCTACCTGCTATCCACCAATGCCCAGCTGCAGCGAGATGCTTCCCATCAGATCCGCCAGGAGGCCCGGGTGCTCCGCAACGAGACCAACAACCAGGTTGGGGATGGGAACTCAGCTGGGTGGGCAAAGGGATAGCCCCCAACCCCTTGACACCCTCTCTATCTGGCTCTGTCTCTCTC	Promoter (<=1kb)	1	36084338	36088275	3938	1	27285	ENST00000469024.1	524	ENSG00000092850	TEKT2	tektin 2	NA	NA	0	0.292615	0.704072	23.1233	0.484642	0.84435	22.0858	0.456779	0.828721	22.1233	0.501742	0.806744	-22.0493	0.146673	0.781216	23.1233
chr1	36172420	36172571	152	chr1:36172420-36172571	10	CTGCAGAACCCTTCACACACGCCACTGGGCTCCTTTGTCCACAGCGGCCAAGAAGGCAGTGTGGCTGGAGAAGGAGGAGAAGGCCAAGGCGCTGCGGGAGAAGCAGCTCCAGGAGCGCCGGCGCCGGCTGGAGGAGCAACGTCTTAAAGCCG	Promoter (<=1kb)	1	36171968	36173479	1512	1	55700	ENST00000462118.1	452	ENSG00000116871	MAP7D1	MAP7 domain containing 1	0.972134	1	0.311537	0.650754	0.941196	-1.28671	0.967269	0.999197	0.0485726	0.283631	0.682531	-2.28671	0.983438	1	0.443055	0.983422	0.987893	-0.417958
chr1	36172654	36172953	300	chr1:36172654-36172953	5	TGTACACGTGTGCTCACCGTCTGCATACTGGTGCAGTGTGTACACACATCCATGTTCACGGCTCTGCCTTATCTGTGTCTATGTGGTCCTATTTGTGTTCACATCTACAGTTGTGTCCCTGTGTTAGAATATCTGGGCACCTGTACAACTGCAGGCACATTTGCTTCTGAATGTGCCACTGTAGGCCCCTGTAACTGTTTACTGTCAGTACCTGTGTTCGTACATGTACCCCATGTGTCTGTATGTATGCAGGTATGCATCTGTGTGAGCGTGCCTAGCTCTGTGACATGGGTAAAGCCC	Promoter (<=1kb)	1	36171968	36173479	1512	1	55700	ENST00000462118.1	686	ENSG00000116871	MAP7D1	MAP7 domain containing 1	0.972134	1	0.311537	0.650754	0.941196	-1.28671	0.967269	0.999197	0.0485726	0.283631	0.682531	-2.28671	0.983438	1	0.443055	0.983422	0.987893	-0.417958
chr1	36178576	36178823	248	chr1:36178576-36178823	21	GCTGCAGGCAGAAAGGGACAAGTGAGTGCGCCTCGGGGACTGAGGGGGCCCTCGTGGGCGCTGGAGAAGAAGCAGAGGCCGAGCCTGAGCCGTTTGCTCCGTCCCCCAGGCGAATGCGAGAGGAGCAGCTGGCACGGGAGGCCGAGGCCCGGGCGGAGCGGGAGGCGGAGGCCCGGAGGCGGGAGGAGCAGGAGGCACGAGAGAAGGCGCAGGCCGAGCAGGAGGAGCAGGAGCGGCTGCAGAAGCAG	Promoter (<=1kb)	1	36178411	36179724	1314	1	55700	ENST00000532131.1	165	ENSG00000116871	MAP7D1	MAP7 domain containing 1	0.124297	0.603103	3.46887	0.803256	0.951591	0.440737	0.200975	0.726107	3.07364	0.777698	0.901905	-0.262176	0.147456	0.681513	1.79199	0.473041	0.781216	0.980213
chr1	36269982	36270142	161	chr1:36269982-36270142	0	AATACAGTCTGCCTGCAGAGTATTGATAATGTTTGAAGCTGGATGATGGAAACACTTGGGTTCCCTATACTGTTCTTTCTACTTTTGTGTATGTTTGAATCAATACTTCTATAATAAAATAAACAGGCTGGGCACATTGGCTCATGCCTGTAATCCCAGCA	Intron (ENST00000469141.6/9967, intron 3 of 12)	1	36289718	36294169	4452	1	9967	ENST00000466743.1	-19576	ENSG00000054118	THRAP3	thyroid hormone receptor associated protein 3	0.353872	0.603103	-23.7799	NA	NA	0	0.184235	0.726107	-23.7799	0.456779	0.828721	22.9243	0.501742	0.806744	-22.8503	0.523999	0.781216	-22.7799
chr1	36270184	36270475	292	chr1:36270184-36270475	10	TTTGAAACCAGCTTGGGCAACATGGCGAGACCTTGTCTCTACAAAAAATACGAAAAGTTAGCCAGCTGTAGTGGCACATGCCGGTAGTCCCAGCTACTCAGGAGGCTGAGGTGGGAGGATCGGTTGAGCCAGCCAGGGAGGTTGAGGCTGCAGTGAGCTATAATCGAGCCACTGCACTCCAGTCTGAAACAACAGAGTGAGACCCTGACACACACACACACGCACACAGGCACACGCACACGCACGCATGCCTGCTCTCGCAGCTATAAGACAGGCCCTTTTAAACCTTCTT	Intron (ENST00000469141.6/9967, intron 3 of 12)	1	36289718	36294169	4452	1	9967	ENST00000466743.1	-19243	ENSG00000054118	THRAP3	thyroid hormone receptor associated protein 3	0.353872	0.603103	-23.7799	NA	NA	0	0.184235	0.726107	-23.7799	0.456779	0.828721	22.9243	0.501742	0.806744	-22.8503	0.523999	0.781216	-22.7799
chr1	36691261	36691414	154	chr1:36691261-36691414	2	TCACCTTCCGCTGAGCCACCAGGGCTAAAACTTGCACCCCATCTTCCACCACTTCCTCTCCCTTGGCCAAAAAACTCTCTCCAATCCATCCACCACCCTAGACCAGGCCACGGTCATCTCTTGCCTCCATCTGCATCCATCCTTCATCCTGCAG	Distal Intergenic	1	36849948	36853687	3740	2	2899	ENST00000479620.1	162273	ENSG00000163873	GRIK3	glutamate ionotropic receptor kainate type subunit 3	0.228498	0.603103	0.575522	0.895973	0.951591	-0.00390265	0.829474	0.958466	0.0936948	0.177814	0.682531	-0.56524	0.0702338	0.605414	0.861275	0.357159	0.781216	0.494404
chr1	36717920	36718106	187	chr1:36717920-36718106	1	TTTCTTTGCTCATCCATAAGAAGCAACTCCTCATCCGTTAAAGTTTTATCATGAGATTGCAGTAATTCAGTCACATCTTCAGGCTCCACTTCTAATTCTAGTTCTCTTGCTATTTCCACCACATCTGCAGTTACTTCCTGTACACAAATCTTGAACCCCTCAAAATAATCCCTGAGGATTGGAACCA	Distal Intergenic	1	36849948	36853687	3740	2	2899	ENST00000479620.1	135581	ENSG00000163873	GRIK3	glutamate ionotropic receptor kainate type subunit 3	1	1	-4.07899	0.253845	0.704072	1.1484	0.720045	0.863081	-0.0203168	0.639663	0.879899	0.148402	0.689972	0.838465	-4.62177	0.0616093	0.781216	2.01716
chr1	36718106	36718292	187	chr1:36718106-36718292	0	AACTTCTTCCAAATTCTTGTACAAGTTGATATTTTGACCTTCTGCCATGAATCATGAATGTTCTTAATGGCATCTAGAATGATGAATCCTTTCCAGAAGGTTTTCAATTTTCTTTGCCCAGATCCACCAAAGAAGTCACTATCTATGGCAGCTCTAGCCTTACAAAATGTACTTCTTAAATTATAAG	Distal Intergenic	1	36849948	36853687	3740	2	2899	ENST00000479620.1	135395	ENSG00000163873	GRIK3	glutamate ionotropic receptor kainate type subunit 3	1	1	-4.07899	0.253845	0.704072	1.1484	0.720045	0.863081	-0.0203168	0.639663	0.879899	0.148402	0.689972	0.838465	-4.62177	0.0616093	0.781216	2.01716
chr1	36718292	36718478	187	chr1:36718292-36718478	1	GACTTGAAAGTCAAAATTATTCCTCGATCCATAGGCTGCAGATTGGATGTTGTGTTAGCAGGCATAAAAACATTAATCTTCTTGTACATCTCCATCAGAGCTTTTGAGTGACCAGGTGCACTGTCAATAAGCAGTAATATGTTGAATCTTTTTTTTTTTCCAGAGCAGTAGTTCTTAACAGTGGCCT	Distal Intergenic	1	36849948	36853687	3740	2	2899	ENST00000479620.1	135209	ENSG00000163873	GRIK3	glutamate ionotropic receptor kainate type subunit 3	1	1	-3.49403	0.253845	0.704072	0.987208	0.720045	0.863081	-0.181511	0.639663	0.879899	-0.0127917	0.689972	0.838465	-3.91664	0.0616093	0.781216	1.85596
chr1	37033127	37033397	271	chr1:37033127-37033397	25	GCCTGCAGGGTGCCTTGGGCGGCCACAACAAAGTTAAAGACCGGAGTAAGAGTCTCCGGCGAGAAGAGACGCGGAGAAGCCGGAGCCCCGGAAAGCCGCGCGCAGCCCCGCCAGCCGCCGCCAGCTGCGGAGGAATTCGGGCTAACTTTAAAAACCGCTGGCGTCCCTGGGCCGCCTGCCCGGGCCGCACTGGGCGGCCTCCATCGTCCCTTCCCTCTACCTGCACTGCCCCAGGCGGGAGAGAGGCCTTGGCCCCGAGGGACCAGCTGCA	Promoter (<=1kb)	1	36804618	37034129	229512	2	2899	ENST00000373093.4	732	ENSG00000163873	GRIK3	glutamate ionotropic receptor kainate type subunit 3	0.276153	0.603103	1.93678	0.940679	0.951591	-1.1525	0.667138	0.845217	0.973308	0.851129	0.940684	-1.34341	0.0698084	0.604003	2.86639	0.718781	0.88524	-0.639308
chr1	37724256	37724554	299	chr1:37724256-37724554	6	GTTTATGGTGGTGCCATTTACTGGGATGAGGAGACAAAAAGTTCACATTTAGACATCTGAGTTTGCAGGCCTGGGGGATAAGCAGGGAAGATAAGACGGGCGTTCGACGTGTGTGTGTGTGTCTGGAGCTTGGAAGAGAGGCCTGCTCTGCAGATACAAATCAGGAGCAATGAGCATGGCCCAGGGAGAGGATGGAGTCTGAGAAGAGGGACTAGGAATAAGTCTGAGAAACCCCAACATCTAGGCTAGCGGAAGGAAGCACCAAGGACAGTACAAAAGAATCGCCAGAGGAACAGAAG	Promoter (2-3kb)	1	37720679	37721857	1179	2	284656	ENST00000453577.1	-2399	ENSG00000183317	EPHA10	EPH receptor A10	0.972134	1	1.03349	0.292615	0.704072	24.358	0.690137	0.845217	0.0700147	0.27781	0.682531	23.9554	0.614107	0.806744	1.9631	0.561579	0.781216	2.10749
chr1	37724642	37724941	300	chr1:37724642-37724941	6	ACAAGGATGAGAGACCAAGGGAGGAGTTTCCGAAGTTTTCACAACAGAGATGATCACATGTAGATACAGATGGGAAGGAGGAGCTAGGCTGTCACACAGGGGGAAGCGGCCACCGCAGGGTGTTGACAGCCTGGGCTCGGAACCTGACTGCAGGGACCTGCTTCCCAGCATCTCCGCTCGGTAGCTGTGGGACTGGGTGGCTCCATTTTCTCTTTAATAAAATCAGGATAAAGATAGGCCTGCCAGACAGCAGCATGTCAGCTTACCAAGCCTCCACACATGTTCACTGTTATGGGGGGC	Promoter (2-3kb)	1	37720679	37721857	1179	2	284656	ENST00000453577.1	-2785	ENSG00000183317	EPHA10	EPH receptor A10	0.972134	1	0.685565	0.292615	0.704072	24.0101	0.690137	0.845217	-0.277909	0.27781	0.682531	23.735	0.614107	0.806744	1.61518	0.561579	0.781216	1.75957
chr1	38213695	38213837	143	chr1:38213695-38213837	9	AGTGCCGGGCAGGGCTTTGGAAAGCGCAATAAATGGCGGACAGACACATGGCGGGAGGGCGGCAGCTGTAGTTAAACAAGTGTAAATTAGCGCCCAGCCTCGCTCCCTGCCTGCAGCCAGAGCGGCGGGCACAGGCCTGGCAG	Promoter (<=1kb)	1	38209034	38214767	5734	2	339442	ENST00000431311.1	930	ENSG00000237290	LINC01343	long intergenic non-protein coding RNA 1343	0.329114	0.603103	21.7635	0.891077	0.951591	2.04678	0.306975	0.726107	22.9419	0.753887	0.879899	1.04678	0.649975	0.806744	-0.771146	0.561579	0.781216	2.91554
chr1	38213837	38213979	143	chr1:38213837-38213979	5	GGGAGGGGTTACAGGATGTGGGGAACTCGCTATCAATCTAGACAGCCCTCATGGCCTCCCTGGAAACCCTTCCGGAGGAGCCCTCCAGCTGGCCGCGTGGGAGACCACGCCTCAGAGAGCACAGGCTTCTGCTCTGCAGGCCT	Promoter (<=1kb)	1	38209034	38214767	5734	2	339442	ENST00000431311.1	788	ENSG00000237290	LINC01343	long intergenic non-protein coding RNA 1343	0.329114	0.603103	21.7635	0.891077	0.951591	2.04678	0.306975	0.726107	22.9419	0.753887	0.879899	1.04678	0.649975	0.806744	-0.771146	0.561579	0.781216	2.91554
chr1	39403032	39403115	84	chr1:39403032-39403115	0	CTCTCTCTTTTGTTTTTTTTGTTTGGTTTGGTTTTTTTTTTGTTTGGTTGTTTTGTTTTGTTTTGTTTTGTTTTGTTTTGTTTT	Intron (ENST00000361689.7/23499, intron 53 of 93)	1	39409503	39428092	18590	1	23499	ENST00000530275.3	-6388	ENSG00000127603	MACF1	microtubule actin crosslinking factor 1	0.983078	1	0.151479	0.245419	0.704072	-0.604027	0.895654	0.999197	0.228746	0.0247721	0.576841	-1.60403	0.831855	0.936433	-0.00189416	0.740012	0.906695	0.264728
chr1	39403174	39403242	69	chr1:39403174-39403242	0	CTGCAGTCTCCACCTCCCAAGTTCAAGTGGTTCTCCTGCCTCAGCCTCCCAAGTAGCTGGGACTACAGG	Intron (ENST00000361689.7/23499, intron 53 of 93)	1	39409503	39428092	18590	1	23499	ENST00000530275.3	-6261	ENSG00000127603	MACF1	microtubule actin crosslinking factor 1	0.983078	1	0.151479	0.245419	0.704072	-0.604027	0.895654	0.999197	0.228746	0.0247721	0.576841	-1.60403	0.831855	0.936433	-0.00189416	0.740012	0.906695	0.264728
chr1	39515206	39515359	154	chr1:39515206-39515359	10	ACCTGCAGGTGGTCAGCAGCAACGTGGGCGTGGAGGACTTCGGCCTGGGCCTCCTGCTGGCCGCCAGGCAGGTCCGTCGCATCGTCTGTTCCTACGTGGGCGAGAACACCCTGTGCGAGAGCCAGTACCTGGCAGGAGAGCTGGAGCTGGAGCT	Promoter (<=1kb)	1	39514956	39516490	1535	1	192217	ENST00000447263.1	250	ENSG00000237624	OXCT2P1	3-oxoacid CoA-transferase 2 pseudogene 1	0.152084	0.603103	26.0661	0.945411	0.951591	-0.622093	0.306975	0.726107	25.1026	0.920918	0.940684	-0.328101	0.0464076	0.476039	26.0661	0.983422	0.987893	-0.584699
chr1	39515518	39515669	152	chr1:39515518-39515669	12	AGGTGAGGGAGTTCAACGGCGACCACTTCCTTTTGGAGCGCGCCATCCGGGCAGACTTCGCCCTGGTGAAAGGGTGGAAGGCCGACCGGGCAGGAAACGTGGTCTTCAGGAGAAGCGCCCGCAATTTCAACGTGCCCATGTGCAAAGCTGCA	Promoter (<=1kb)	1	39514956	39516490	1535	1	192217	ENST00000447263.1	562	ENSG00000237624	OXCT2P1	3-oxoacid CoA-transferase 2 pseudogene 1	0.152084	0.603103	26.0661	0.945411	0.951591	-0.622093	0.306975	0.726107	25.1026	0.920918	0.940684	-0.328101	0.0464076	0.476039	26.0661	0.983422	0.987893	-0.584699
chr1	39551582	39551767	186	chr1:39551582-39551767	2	TCTTCAGGTGTTAATTGGTTTAAGAGAGCCTAACTCTTCAATGGCTGTTTTTGACTACAGCTAATCACAGCAGTTCTCCATAATCACTTTCATATACTACATGAAACACTGCTCTTACATAAGATTCACAAATTGACCCTGCAGGCTGGGCGTGGTGGCTCATGCCTGTAATCCCGGCACTTTGGG	Intron (ENST00000701995.1/728448, intron 3 of 8)	1	39522287	39556660	34374	2	728448	ENST00000450157.6	4893	ENSG00000243970	PPIEL	peptidylprolyl isomerase E like pseudogene	1	1	-1.31015	0.123414	0.704072	22.2241	1	1	-1.60016	0.176959	0.682531	22.6205	1	1	-0.677415	0.197631	0.781216	0.437317
chr1	39551767	39551952	186	chr1:39551767-39551952	2	GAGGCTGAGGCGGGCAGACCACTTGAAATCAAGAGTTCAAGACCAGCCTGGCCAACATGGTGAAACCCTGTCTCTACTAAAAAGACAAAAATTAGCTGGGCATAGTGGTGTGCGCCTGTAATCCCAGCTACTTGGGTGGCTGAGGCAGGAAAATCACTTGAACCCAAAAGGCAGAGGCTGCAGTGA	Intron (ENST00000701995.1/728448, intron 3 of 8)	1	39522287	39556660	34374	2	728448	ENST00000450157.6	4708	ENSG00000243970	PPIEL	peptidylprolyl isomerase E like pseudogene	1	1	-1.31015	0.123414	0.704072	22.2241	1	1	-1.60016	0.176959	0.682531	22.6205	1	1	-0.677415	0.197631	0.781216	0.437317
chr1	39770448	39770692	245	chr1:39770448-39770692	19	TCACGCGATCTACATAAATGTTAGGAACGTGGATGTCTTCTGGGGGGAAAGCCCCCACCTCCACGATCTCTTCCACCTCCACCGCCGTGACGTCTGCAGCTTTGCACATGGGCACGTTGAAATTGCGGGCGCTTCTCCTGAAGACCACGTTTCCTGCCCGGTCGGCCTTCCACCCTTTCACCAGGGCGAAGTCTGCCCGGATGGCGCGCTCCAAAAGGAAGTGGTCGCCGTTGAACTCCCTCACC	Promoter (<=1kb)	1	39769523	39771348	1826	2	64064	ENST00000327582.5	656	ENSG00000198754	OXCT2	3-oxoacid CoA-transferase 2	0.152084	0.603103	25.7766	0.945411	0.951591	-0.792018	0.306975	0.726107	24.8131	0.920918	0.940684	-0.395002	0.0464076	0.476039	25.7766	0.983422	0.987893	-0.754624
chr1	39770851	39771002	152	chr1:39770851-39771002	10	GAGCTCCAGCTCCAGCTCTCCTGCCAGGTACTGGCTCTCGCACAGGGTGTTCTCGCCCACGTAGGAACAGACGATGCGACGGACCTGCCTGGCGGCCAGCAGGAGGCCCAGGCCGAAGTCCTCCACGCCCACGTTGCTGCTGACCACCTGCA	Promoter (<=1kb)	1	39769523	39771348	1826	2	64064	ENST00000327582.5	346	ENSG00000198754	OXCT2	3-oxoacid CoA-transferase 2	0.152084	0.603103	25.7766	0.945411	0.951591	-0.792018	0.306975	0.726107	24.8131	0.920918	0.940684	-0.395002	0.0464076	0.476039	25.7766	0.983422	0.987893	-0.754624
chr1	39810407	39810631	225	chr1:39810407-39810631	4	ACTGCAGCCTCTGCCTCCTGGGTTCCAGTGATTCTCCTGCCTCAGCCTCCTGGGTAACTGGGATTACAGGCATCCACCACCATGCCCGGCTAATTTTTGTATTTTTAGTAGAGACGGGGTTTCACCATGTTGGCCAGGCTGGTCTCAAAATCCTGGCCTCAGGTGATCCACCCGCCTCGGCCTCCCAAAGTGCTGGGGTTACAGGTGTGAGCCACTGCAGCCAGC	Intron (ENST00000641026.1/107985740, intron 2 of 3)	1	39804521	39809450	4930	1	105378951	ENST00000641632.1	5886	NA	LOC105378951	uncharacterized LOC105378951	0.329114	0.603103	22.8108	0.389207	0.704072	-22.6092	0.306975	0.726107	23.4212	0.753887	0.879899	0.259019	0.649975	0.806744	0.0166158	0.350384	0.781216	-23.3143
chr1	41836323	41836592	270	chr1:41836323-41836592	3	GCATGGCTGCAGGAGAAGGACAGGCAGAGAGCACAGCTGGGTCAGGTTCAGCCTGGGTTAGTGGCTGGCATGGGAAGATGCCTGGTCTCCAGAGCTGCTGAGGGTGACAAGGGACATGCTGCAGTTCTCCTTGGGCGTCACAGGGCAACTTCCAGGATGTTTCAGAACGTCCTCATCTCCTTGATCTCCTTACGAGTAATCCCATCAACAAGACAATCTGAGCATGTTCTCAGTTCCCACAGCAAGAGCTAAGAAGCAGATCAATGAAAC	Intron (ENST00000372584.5/59269, intron 1 of 7)	1	41847948	41869630	21683	2	59269	ENST00000479350.1	33038	ENSG00000127124	HIVEP3	HIVEP zinc finger 3	0.972134	1	0.832597	0.123414	0.704072	25.3088	0.690137	0.845217	-0.130877	0.27781	0.682531	24.3088	0.614107	0.806744	1.76221	0.0361852	0.781216	25.3088
chr1	41836649	41836876	228	chr1:41836649-41836876	1	TTTATTTCTCATGTTTTCCCCTTGAAGGAAATTCACAAGAATGCAACCAGTCCTTTGGAGTTAGTTGTGGTAGGATGCGACTGGCAAACCTAAGAGGCATCCTGGCTTTTCTCATTTCACCCACCCATGTCTAAACCCCTAGTGAGTCTGCAGTGGCTCTACTTCCAAAGCATCCCTATAACCCAACAACTCTCTCCATCCCATTGCCAAAACTCAAATCATACAACT	Intron (ENST00000372584.5/59269, intron 1 of 7)	1	41847948	41869630	21683	2	59269	ENST00000479350.1	32754	ENSG00000127124	HIVEP3	HIVEP zinc finger 3	0.972134	1	0.832597	0.123414	0.704072	25.3088	0.690137	0.845217	-0.130877	0.27781	0.682531	24.3088	0.614107	0.806744	1.76221	0.0361852	0.781216	25.3088
chr1	42337732	42337804	73	chr1:42337732-42337804	1	CTGCAGTGAGTTGTGACTGCGCCACTGCACTCCAGCCTGGGTAACAGAGTGAGACCCTGTCTTTAAAAAAAAA	Promoter (1-2kb)	1	42176539	42335877	159339	2	22887	ENST00000372573.5	-1855	ENSG00000198815	FOXJ3	forkhead box J3	0.173089	0.603103	-24.4952	0.389207	0.704072	-23.0088	0.0550356	0.726107	-24.4952	0.753887	0.879899	-0.0845249	0.325495	0.704731	-23.5656	0.350384	0.781216	-23.4952
chr1	43222008	43222276	269	chr1:43222008-43222276	4	TGGTGCTGGAAGGGATGGGAGAGCGCCCAAGGCTCCTGGGTGTCCCTGAAGCAAGTGCTGCTCTCCCACCTTAAATACCATCCTTGCTTCTCTCCAGAATGTTGCAACAACCAAAAGTTGCTTCTAGAATATGAGAAGTACCAGGAGCTGCAGCTCAAGTCCCAGAGGATGCAGGAAGAGTATGAAAAACAGCTCCGGGATAACGATGAGACCAAGAGCCAGGCCCTGGAGGAGCTGACTGAGTTTTACGAGGCAAAACTGCAGGAGAA	3' UTR	1	43215356	43222278	6923	1	149465	ENST00000428122.1	6652	ENSG00000243710	CFAP57	cilia and flagella associated protein 57	0.173089	0.603103	-23.7217	0.891077	0.951591	3.06977	0.250573	0.726107	-1.45356	0.858173	0.940684	3.29046	0.22065	0.681513	-23.5389	0.950293	0.986213	0.583916
chr1	43637121	43637346	226	chr1:43637121-43637346	5	CTGCAGCCCAGAGTGCAAGGGGAGAGTGGGGCAGGATGGGGTGCAGAATGGGCAGGGGCTCTCGCAGACATGAGCAAGGCACTTTGGATTCAGGATAGGGGCACAGAAAGCTTTTAAGGGGTTTTCAATAAGGTAGTTCATTGGATTTGCTTTTCTTCGTCTTTGAGACAGGGTCTCACTCTGTCGCCCAGGCCTGAGTGCAGTGGCGCAATCGCAGCTCACTGCA	Distal Intergenic	1	43650149	43705518	55370	1	9682	ENST00000372396.4	-12803	ENSG00000066135	KDM4A	lysine demethylase 4A	0.0714139	0.603103	2.47782	0.771312	0.951591	0.476124	0.116025	0.726107	1.95754	0.800053	0.922068	0.114454	0.108967	0.681513	1.86749	0.790959	0.933855	0.631625
chr1	43637363	43637485	123	chr1:43637363-43637485	1	CTCAAGCCATCCTCCCACCTCAACCTCCCAAGTAGCTGGGACTACAGGTGCACACCACCGTCCCTGGCTAATTTTTTAATGTTTTTGTAGAGACAGGGTCTCACTATGTTGCCCAGGCTGGGG	Distal Intergenic	1	43650149	43705518	55370	1	9682	ENST00000372396.4	-12664	ENSG00000066135	KDM4A	lysine demethylase 4A	0.0714139	0.603103	2.47782	0.771312	0.951591	0.476124	0.116025	0.726107	1.95754	0.800053	0.922068	0.114454	0.108967	0.681513	1.86749	0.790959	0.933855	0.631625
chr1	43983054	43983352	299	chr1:43983054-43983352	6	CTGAGTGAGATGGGGACACAGGAGCTGGGCCAGCTCTGGGGGAGTGTGACTCTGAATCCTTTCTTGCGTGTGATGAGTTTGAGCGCCTGTGGGAAGTACATGTTTAGCAGGCAGTTAGACAAATGAGTCTGGACCCAGAAGGGAGGTCTGCAGTGGAGAGAGGGATCTGGGAGCACCAGGATGAAGACGGTCTGGTCCCTAAAACCAACAACGTCTGACCTGCCAGGGAGCAAGGGGCATGAGAGGAGGAAGCCAGCACTTCAGGGATGGAGGGAGAAAGAGGCCGCTACAGAGGCCGA	Intron (ENST00000434555.7/8704, intron 3 of 6)	1	43979936	43991170	11235	1	8704	ENST00000309519.8	3118	ENSG00000117411	B4GALT2	beta-1,4-galactosyltransferase 2	NA	NA	0	NA	NA	0	0.484642	0.84435	20.6345	0.456779	0.828721	20.6719	0.501742	0.806744	-20.5979	0.523999	0.781216	-20.5275
chr1	44540068	44540219	152	chr1:44540068-44540219	0	ATTTAAAGGCATTCTTCCACACTGGCTTCAGCTGAACTTTGAAGAATGCTCCCCTTATGCAGCCAAGCTCAAAGTCTATGCCTGATGGTCTCCCCAGGATACCTCTGAGCAGCCTTCCTCAACCACTGCCCACATCTCTTCCCCAGGCTGCA	Intron (ENST00000355387.6/55182, intron 2 of 14)	1	44545493	44545552	60	1	100847089	ENST00000581357.1	-5274	ENSG00000263381	MIR5584	microRNA 5584	0.679664	0.885847	-0.00561208	0.803256	0.951591	0.752964	0.454207	0.84435	0.428108	0.726515	0.879899	0.855189	0.949683	1	-0.426523	0.909555	0.986213	0.245089
chr1	44714885	44715028	144	chr1:44714885-44715028	2	TTTTCTTTTTTTGTTGGGGGGGAAACAGTTTTACTGTTTCCCAGGCTGGAGTTGAGTGGCTTGACAGCTCACTGCAGCCTCAAACTCTTGGGCTCAAGCGATCCTCCCGCCTCAGCCTCTTAAAGTGTTGAGATTGCAGGCATG	Intron (ENST00000424484.5/339541, intron 4 of 5)	1	44721786	44721902	117	2	26828	ENST00000362507.1	6874	ENSG00000199377	RNU5F-1	RNA, U5F small nuclear 1	0.152084	0.603103	23.1318	0.292615	0.704072	22.2624	0.306975	0.726107	22.1683	0.27781	0.682531	22.2058	0.0464076	0.476039	23.1318	0.561579	0.781216	1.25977
chr1	44824544	44824757	214	chr1:44824544-44824757	4	CTGCAGTGCAGTGGTGTAATCATGGCTCACTGCAGCCTCAAACTCTGAGGTTCAAGTGATCCTCCCGCCTCAACCTCCTGAGTGGCTGAGACTACAGGCACGCACCACCATGCCCAGCTAATTATTTAAAAAAAATTTTTTTTCTTTGAGACGGAGTCTTGCTCTGTTGCCCAGGTTGGAGTGCAGTGGCGCAATCTTGGCTTACTGCAGCCTC	Promoter (1-2kb)	1	44819844	44823260	3417	2	8643	ENST00000438067.5	-1284	ENSG00000117425	PTCH2	patched 2	0.644036	0.849049	-0.322887	0.205257	0.704072	-21.6797	0.267894	0.726107	-1.28636	0.320819	0.687733	-1.11764	0.983438	1	0.606724	0.244564	0.781216	-21.6276
chr1	44834472	44834624	153	chr1:44834472-44834624	2	CTGCAGTGTTTATTTCACCAAGATTAGGCCGAAGGCTGCCGCATGGAAGGGAAGAAGAGGACAGAGATAAGCTCTCCATAGTAAGTGGGTTTGCTGAGAGGAAGGAGGCATGGGAGGAGGAAGGAACCCAGAGAGATCTGATAAGAAAGCAAG	Intron (ENST00000447098.6/8643, intron 2 of 22)	1	44819844	44842944	23101	2	8643	ENST00000447098.6	8320	ENSG00000117425	PTCH2	patched 2	0.329114	0.603103	22.7733	0.891077	0.951591	0.534967	0.306975	0.726107	22.686	0.753887	0.879899	-0.465033	0.614107	0.806744	1.25933	0.561579	0.781216	1.40372
chr1	44973237	44973393	157	chr1:44973237-44973393	2	ATTTGTACATCCATATTCACAGCTGCATTATTCACAATAGCTAAAATGTGGAGGCAACCCAAGTGTCCGTGGATGGATGAATGGCTAAGCAAAATGTGGCATATCCATAAAATAGAATATTCCTCAGCCTTAAAAACGAAGTAAATTCTGCAGTATG	Intron (ENST00000360403.7/8891, intron 3 of 11)	1	44926628	44986586	59959	2	8891	ENST00000477953.5	13193	ENSG00000070785	EIF2B3	eukaryotic translation initiation factor 2B subunit gamma	0.329114	0.603103	22.8987	0.292615	0.704072	22.9727	0.484642	0.84435	21.9352	0.456779	0.828721	21.9727	0.167938	0.681513	22.8987	0.146673	0.781216	22.9727
chr1	44973393	44973549	157	chr1:44973393-44973549	3	GCTACAATATGGATGAACCTTGAGGATGTTATGCTAAGTAAGCCAATCACAAAAAATAAATACTGGAGGCCAAGGTGGGCAGATCACTTGAGGCCAGACGTTCGAGACTAGCCTGGCCAACATGGCGAAACCCCATTTCTACTAAAAATACAAAAAC	Intron (ENST00000360403.7/8891, intron 3 of 11)	1	44926628	44986586	59959	2	8891	ENST00000477953.5	13037	ENSG00000070785	EIF2B3	eukaryotic translation initiation factor 2B subunit gamma	0.329114	0.603103	22.8987	0.292615	0.704072	22.9727	0.484642	0.84435	21.9352	0.456779	0.828721	21.9727	0.167938	0.681513	22.8987	0.146673	0.781216	22.9727
chr1	44973549	44973705	157	chr1:44973549-44973705	0	CTAGCCAGGTGTAGTAGGTAGGGCATGCACCTGTAGTTCCAGCTACTCAGGAGGCTGAGGCACAAGACATGCTTGAACCTGGGAGGTAGAGGCTGCAGTGAGCTGAGATCATGCCACTGCACCCCAGCCAGGGTGATAGAGTGAGACTCTGTCTCAA	Intron (ENST00000360403.7/8891, intron 3 of 11)	1	44926628	44986586	59959	2	8891	ENST00000477953.5	12881	ENSG00000070785	EIF2B3	eukaryotic translation initiation factor 2B subunit gamma	0.329114	0.603103	22.8987	0.292615	0.704072	22.9727	0.484642	0.84435	21.9352	0.456779	0.828721	21.9727	0.167938	0.681513	22.8987	0.146673	0.781216	22.9727
chr1	45618860	45618991	132	chr1:45618860-45618991	1	AGAATTGACTTCTCAAATAAAGATGCTAAAAATCTCCTTGTCTGGAATTATGTTTAAAGATCTTAAGTGGGGTCTTAGGCTGCTTTTTTGAGATGGGATCTTGCTCTTGTCGCCCAGGCTGGAGTGCAGTGG	Promoter (1-2kb)	1	45617237	45618246	1010	1	4678	ENST00000472408.1	1623	ENSG00000132780	NASP	nuclear autoantigenic sperm protein	0.972134	1	4.2816	0.123414	0.704072	25.3689	0.641273	0.845217	4.88372	0.114587	0.682531	25.0611	0.744146	0.869065	-0.0100513	0.414159	0.781216	1.8439
chr1	46402746	46402899	154	chr1:46402746-46402899	0	GCAGTGGCATGATCTTGGCTCACTGCAGCCTCCACCTCCTGGGTTCAAGTGATTCTTCTGCCTCAGCCTCCTGAGTAGCTGGGAGTACAGGCACCTGCTAACACACCCAGCTAATTTTTGTATTTTTAGTAGAGATGGGATTTTACCATGTTGG	Promoter (2-3kb)	1	46405723	46413848	8126	1	2166	ENST00000484697.5	-2824	ENSG00000117480	FAAH	fatty acid amide hydrolase	0.152084	0.603103	24.1558	0.113079	0.704072	-24.5192	0.203351	0.726107	23.7573	0.0248533	0.576841	-24.5192	0.22065	0.681513	2.06067	0.244564	0.781216	-23.6504
chr1	46402899	46403052	154	chr1:46402899-46403052	3	GTCAGGCTGGTCTGGAACTCCTGACCTCAAGTGATCCACCCGCCTCGGTCTCCCAAAGTGCTGGGGTTACAGCTGTGAGCCACTGCAGCTGGCCCCCAACTAATTTTTTGTATTTAGTAGAGACGGGGTTTCACCATGTTGATCAGGCTGGTCT	Promoter (2-3kb)	1	46405723	46413848	8126	1	2166	ENST00000484697.5	-2671	ENSG00000117480	FAAH	fatty acid amide hydrolase	0.152084	0.603103	24.1558	0.113079	0.704072	-24.5192	0.203351	0.726107	23.7573	0.0248533	0.576841	-24.5192	0.22065	0.681513	2.06067	0.244564	0.781216	-23.6504
chr1	46551102	46551297	196	chr1:46551102-46551297	8	AGCTGCAGCCTTGGATACGGAGATGCCGATAATGATGCTGCCAGCCACCAGCCCGAGAGCCACGCAGGCCAGCTGCAGGCCGCGGAAGTCTCTGCTGCTGATGGGGATGTCCATGCAGGCCCACCCGGGGCACTGCCTCCAGCCGGTGCAGTCTGGCCCCAGAAAAGTCCTGGAAGTTTCTGGGCTCTTGGATGTC	Promoter (<=1kb)	1	46547428	46551215	3788	2	148930	ENST00000396314.3	0	ENSG00000162456	KNCN	kinocilin	0.353872	0.603103	-24.2481	0.891077	0.951591	1.49515	0.65379	0.845217	-2.1126	0.753887	0.879899	0.495148	0.325495	0.704731	-23.8339	0.561579	0.781216	2.3639
chr1	46604089	46604379	291	chr1:46604089-46604379	25	TGAAGGCCCTGACTGCCCCCTTCCGGGCACACGAGCTCACTCACAGACCCCGGCCCCATTTAGCTCGGAGGAATACCTCGCAGGTCTCGCTTTTACCTTCGCTGGCTCCCGCCGGGGAGCGGTCGCGCGCACCCCTACCTGCAGATCGCTCCTCCGAGAACGCGGAAGAGGCGGTGCTAGATCCAGGGGGTGGGCCCGATCAGAGAGGAGGGTGAGGGGGCGGAGCTGCGCCTGCGCCCTGATGGCTACCCAGGGCCGCCTGAGGGCAGGGGGCTCGAGCTGAGCGAACTG	Promoter (<=1kb)	1	46557407	46604268	46862	2	8569	ENST00000371945.10	0	ENSG00000079277	MKNK1	MAPK interacting serine/threonine kinase 1	0.353872	0.603103	-24.4157	0.292615	0.704072	24.7589	0.184235	0.726107	-24.4157	0.27781	0.682531	24.6629	0.501742	0.806744	-23.4861	0.561579	0.781216	1.34319
chr1	46604391	46604577	187	chr1:46604391-46604577	9	CAGGGAAGAGGCGGGGAGAGGGGAGATTGCTGGCAAGCGGGTGGGGCTTAGCTCCTCCGGCGCTTTCTTTTCCGAATGGAGGGTGGAGAAGCCCGGGAAGGTAGGAGGCCGGGCGCGACAGGTGTAATTAACATGTACTGAGAGCTTCTGCAGGCCAGGAAGGAATTTTAAAATGCCTTTTATATGT	Promoter (<=1kb)	1	46568456	46604294	35839	2	8569	ENST00000496619.6	-97	ENSG00000079277	MKNK1	MAPK interacting serine/threonine kinase 1	0.353872	0.603103	-24.4157	0.292615	0.704072	24.7589	0.184235	0.726107	-24.4157	0.27781	0.682531	24.6629	0.501742	0.806744	-23.4861	0.561579	0.781216	1.34319
chr1	46612685	46612865	181	chr1:46612685-46612865	1	AGAAAAAGAAAAGAAAGAAAAGCCCCAAATTGGGAGTCAGGAAGTCCTAGCAAATGCTTGACCTTGAGCAAGGCACTTAACCTGTTTCAACCTCGCTTTCCTCTTCCACAAAATGGGGATGAAAATCAACCCCCAACCCTGCAGAGTGTCTATATCAAACTAAATCCTCATCTGTGGAATG	Promoter (2-3kb)	1	46607719	46615133	7415	2	148932	ENST00000271139.13	2268	ENSG00000142961	MOB3C	MOB kinase activator 3C	0.152084	0.603103	24.1267	0.891077	0.951591	4.26298	0.203351	0.726107	24.3816	0.858173	0.940684	4.02052	0.236697	0.690204	0.591972	0.917251	0.986213	1.55242
chr1	46612865	46613045	181	chr1:46612865-46613045	17	GGGCTCCCAGTGGCTCCCTCCCCGCCAGGTGACACTCACCAACACGCGTGGGAAAGACCTCTTCGTCGTTGATGAGGCCTTCGATCCAGTCCATGAGCAATGCCATATAGCGCGGCGCAGAGAGCTTGGCGGGCCGCCGGTACTGGCGCTCGTCCTGCCAGCGGTACTCGTAGCGGGGCCC	Promoter (2-3kb)	1	46607719	46615133	7415	2	148932	ENST00000271139.13	2088	ENSG00000142961	MOB3C	MOB kinase activator 3C	0.152084	0.603103	24.1267	0.891077	0.951591	4.45563	0.203351	0.726107	24.4946	0.858173	0.940684	4.13755	0.236697	0.690204	0.399327	0.917251	0.986213	1.74506
chr1	46613045	46613225	181	chr1:46613045-46613225	15	CGCCGGCCATGACCGGGCAGCTGGTCTCACTGCAGCGCTCCGCCATAGTGCCGTAGATGAGGTTGATGCGGTTGAAGAAGTCCACCACGTGCACGGCGATCCAGTCGTCGATGTTCTCCCCGGGTGGTAGCCTCACCACACTGCGCAGGTCCAGGCCCGACTTGAGAGAGGCCTGTGCCTT	Promoter (1-2kb)	1	46607719	46615133	7415	2	148932	ENST00000271139.13	1908	ENSG00000142961	MOB3C	MOB kinase activator 3C	0.152084	0.603103	24.1267	0.891077	0.951591	4.45563	0.203351	0.726107	24.4946	0.858173	0.940684	4.13755	0.236697	0.690204	0.399327	0.917251	0.986213	1.74506
chr1	47341306	47341463	158	chr1:47341306-47341463	0	GTATCATAGATATCCTTTCAGTTCTTTACCTATAGATTTAATTCATTTGTGTTTTTTTGTTTGTTTGTTTGTTTTGAGACAGAGACTCACTCAGTCTGTCACCCCCAGGCTAGAGAACCTTGGCACTCTCTTGTCTCACTGCAGCCTCTGCCTTCCAG	Intron (ENST00000371873.10/51727, intron 1 of 5)	1	47333941	47373443	39503	1	51727	ENST00000371870.3	7365	ENSG00000162368	CMPK1	cytidine/uridine monophosphate kinase 1	0.972134	1	0.525828	0.891077	0.951591	0.731073	0.690137	0.845217	-0.437646	0.753887	0.879899	-0.268927	0.614107	0.806744	1.45544	0.561579	0.781216	1.59983
chr1	47847421	47847636	216	chr1:47847421-47847636	3	CATGGGTCATTATGCATGGAAATATGTCGGGTTGCAATGAATTGAATAGTTTTGACATTGTTATGTCAACTGACATTGAATGGTGCCCTCTCACTGGACTGATGGGGAAACTGAGGCCCAGAGCTGGAAAGTCAATTGCACACAGTGGCTGCAGGAGTCAGCAGCAGATGCGGAACTGAGCTCAGTATTCCCTCACATCTGCTCCAGCGCCCTGCA	Intron (ENST00000606738.3/388630, intron 2 of 6)	1	47761132	47765547	4416	2	388630	ENST00000438589.1	-81874	ENSG00000269113	TRABD2B	TraB domain containing 2B	0.169398	0.603103	-0.535954	0.159997	0.704072	-1.33596	0.0291958	0.726107	-1.02291	0.277169	0.682531	-0.656159	0.613387	0.806744	0.06358	0.18736	0.781216	-1.2506
chr1	47852515	47852695	181	chr1:47852515-47852695	4	TTCCCTGCAGCCCACCAGGGCCACCATTGCTGGTCACGTCTGGCCAGAACTCTCCGGGAATGTCAGCTCTCAGCAGGACCAGCAGACTCTCAAAGCACGCTGTGATTGCCCGAGCTCCCTCTGAGCCTATCCATTTCTGCTGTGTTCCAGGCACTGGTTACATACTATTTCAATAATCCCA	Intron (ENST00000606738.3/388630, intron 2 of 6)	1	47761132	47765547	4416	2	388630	ENST00000438589.1	-86968	ENSG00000269113	TRABD2B	TraB domain containing 2B	0.329114	0.603103	23.5644	NA	NA	0	0.484642	0.84435	22.6009	0.456779	0.828721	22.6384	0.167938	0.681513	23.5644	0.523999	0.781216	-22.494
chr1	47852695	47852875	181	chr1:47852695-47852875	1	AGAGGAGGAGGTACCATTGTTATCCCCATTCTGCAGATGAAGAAATGGGGTGGGTGGTGGTGGTGCTGCTGAGGTTAAGTTATTCATCCAAGCTCATTTTCCCAAGTGTCTTCGACTGAAGAACTCTTAACAACCATAATACCTGCCCCAAAGTTGAGTATTTCAAAGTATATATATATTT	Intron (ENST00000606738.3/388630, intron 2 of 6)	1	47761132	47765547	4416	2	388630	ENST00000438589.1	-87148	ENSG00000269113	TRABD2B	TraB domain containing 2B	0.329114	0.603103	23.3718	NA	NA	0	0.484642	0.84435	22.4083	0.456779	0.828721	22.4458	0.167938	0.681513	23.3718	0.523999	0.781216	-22.3014
chr1	49251796	49251943	148	chr1:49251796-49251943	1	GTCCAGGAGTTGGGAGCTGAGTGGTGGCTCTCTAAAATCTACCAGAAACGAAGCCAGTTGGCTAAATCCACCTTATACCACAAACCCTCAAGGTCATCAAACAGGATAAAAAAAATCCAAAGGTCAACAACCTCAAAGACTGCAGGAC	Intron (ENST00000371839.6/84871, intron 3 of 13)	1	49257411	49269285	11875	1	101929721	ENST00000420071.1	-5468	ENSG00000230114	AGBL4-AS1	AGBL4 antisense RNA 1	0.353872	0.603103	-21.9061	0.945411	0.951591	-2.52106	0.690137	0.845217	1.90361	0.717538	0.879899	-3.52106	0.325495	0.704731	-23.9672	0.596098	0.781216	-1.6523
chr1	49556824	49556977	154	chr1:49556824-49556977	10	CTGCAGGTCCTGAGCCCTGCCCTGCAGGGAGATGGCTGAGGCCTGACGAGAATTCAAGCGCGGCGCGGGTGGGCCTGCAGTGCTGGGGGACCCGGCGCACCCTCCGCAGATGCTGGCCCAGGTGCTAAGCCCCTCACTGCCTGGGGCCGGCGGT	Intron (ENST00000371839.6/84871, intron 3 of 13)	1	49374201	49472085	97885	2	100874313	ENST00000457061.1	-84739	ENSG00000225623	AGBL4-IT1	AGBL4 intronic transcript 1	0.035551	0.603103	27.1832	0.0347347	0.704072	-27.2159	0.0927196	0.726107	26.4541	0.00311724	0.576841	-27.2159	0.0193369	0.476039	3.50309	0.123911	0.781216	-26.3472
chr1	49556977	49557130	154	chr1:49556977-49557130	8	TGCCTGCCGGCTGCTAGCTGCTCAGAGTGCGGGGCTGCCCAGCCCTCGCTCACTCGGAACTCGCACTGGCCCGTGATTGCTGCGTGCAGCCCTGGTTCCCACCCGAGCCTCTCCCTCCACACCTCCCCACAAGCAGAGGGAGCTGGCTGCAGCC	Intron (ENST00000371839.6/84871, intron 3 of 13)	1	49374201	49472085	97885	2	100874313	ENST00000457061.1	-84892	ENSG00000225623	AGBL4-IT1	AGBL4 intronic transcript 1	0.035551	0.603103	27.1832	0.0347347	0.704072	-27.2159	0.0927196	0.726107	26.4541	0.00311724	0.576841	-27.2159	0.0193369	0.476039	3.50309	0.123911	0.781216	-26.3472
chr1	50172023	50172165	143	chr1:50172023-50172165	2	CTGCCTCCTCAGGGGCTTTGTAGATGAGGGGAGTAACTGTTCGGTTTCTGGAGAATGATGGTTTTTAAAAAGCGAAAGAGCAAGGTGTGCAGATTGGCAGTGCAGAAATGCTGAGGTTCTTTCTGGCCAGCTTCTCTACTGCA	Intron (ENST00000651693.1/1996, intron 4 of 6)	1	50174306	50175868	1563	2	107984955	ENST00000442477.1	3703	NA	ELAVL4-AS1	ELAVL4 antisense RNA 1	0.909596	1	0.43168	0.128191	0.704072	-1.26854	0.849954	0.974633	0.0984279	0.0887221	0.682531	-1.20181	0.664874	0.822033	0.592625	0.247109	0.781216	-0.859595
chr1	51708950	51709171	222	chr1:51708950-51709171	6	ATGCAGTTTAATTTTGCATATATTTATTTAAAATCCCATGAGAGCCTTTTGGTCCCAGCAGCAGCAGAGCTGAGCAAGCAGCTCCCTCCCTCCCTCCGCTGCCCGCTGGCCAGCAGGATGGAACAGGCCACACTCCTTTGTCAAGGACTTACTGGCCGGAGGCATTGCCCTCGCTATTTCCAAGAGGGCAGCGACCCGAGTTGAGCCAGTCAAGGCACTGCT	Exon (ENST00000424829.1/ENST00000424829.1, exon 1 of 1)	1	51714003	51756657	42655	1	114883	ENST00000484890.5	-4832	ENSG00000117859	OSBPL9	oxysterol binding protein like 9	0.540475	0.803215	0.785523	0.824429	0.951591	-0.0702157	0.537372	0.845217	0.615108	0.317339	0.687733	-0.627048	0.626566	0.806744	0.57573	0.664733	0.839053	0.439087
chr1	53439049	53439196	148	chr1:53439049-53439196	14	CTGCAGGGAGTAGCCGAAGAAGGTCTGAGCGCAGCCGCGAGCCAGGCCGCACAGCCCGTCGCTGTGCACCGTCACGCCGAAGCCGCTGAGGACGCCCTTGTACCAGCCGGGGTCCACCTGCATGCGGCACTTGACCAGGTGCAGGGAC	Promoter (<=1kb)	1	53438711	53439569	859	2	163742	ENST00000562700.1	373	ENSG00000236253	SLC25A3P1	solute carrier family 25 member 3 pseudogene 1	0.035551	0.603103	26.9456	0.78751	0.951591	-0.529153	0.136921	0.726107	25.9821	0.280521	0.682531	-1.52915	0.00394019	0.476039	26.9456	0.694449	0.862197	0.339602
chr1	53439196	53439343	148	chr1:53439196-53439343	14	CACGATGGCCGTGTGTGTCAGCCGCAGCTCAGCATCCCGCCCAGGCCGCACAGCAGCAGGTACCGGGCCGAGCCGTACTCCACGCTGGCCTCCTCCACAGCCGCCGCCCAGGGTCTGCTGACGCCTTGGCCCACGCTTCTCGCCTGCA	Promoter (<=1kb)	1	53438711	53439569	859	2	163742	ENST00000562700.1	226	ENSG00000236253	SLC25A3P1	solute carrier family 25 member 3 pseudogene 1	0.035551	0.603103	26.9456	0.78751	0.951591	-0.529153	0.136921	0.726107	25.9821	0.280521	0.682531	-1.52915	0.00394019	0.476039	26.9456	0.694449	0.862197	0.339602
chr1	53439343	53439490	148	chr1:53439343-53439490	18	AGCGCTCGGCGGCCGCGAGGGGATCATCCATGGCCACGCTGGGTGCGGGCCCACCCTGCCCTCCGCCCCTCCAGGCGCACTCACTCAGGGGCCGCGGGGCGGGGCAGAGCGTCGTGAACCTCCCTCGCGAGTCCGCCCACACAACGGC	Promoter (<=1kb)	1	53438711	53439569	859	2	163742	ENST00000562700.1	79	ENSG00000236253	SLC25A3P1	solute carrier family 25 member 3 pseudogene 1	0.035551	0.603103	26.5133	0.822274	0.951591	-1.30214	0.136921	0.726107	25.5498	0.294698	0.682531	-2.30214	0.00394019	0.476039	26.5133	0.670429	0.841664	-0.433384
chr1	54065818	54065981	164	chr1:54065818-54065981	1	CTTGTAATCCATGTGCTTTCAGAGGCTGAGGTGAGGGGATCAGTTGAGGCCAGGAGTTTGACTGGGCAACAGAGTGAGACCCCATGTCTACAAAAAATACAAAAATTAGCCAGGTGTGGTGATGCATGCCTGCAGTCCCAGCTACTCGGGAAGCTGAAGCAGAA	Intron (ENST00000648983.1/127428, intron 2 of 5)	1	54054134	54096493	42360	1	127428	ENST00000371331.1	11684	ENSG00000116205	TCEANC2	transcription elongation factor A N-terminal and central domain containing 2	0.0634876	0.603103	1.63072	0.825938	0.951591	-0.19069	0.399235	0.84435	0.820874	0.362189	0.761294	-0.755475	0.0063881	0.476039	2.14739	0.761958	0.915692	0.350537
chr1	54066153	54066187	35	chr1:54066153-54066187	0	GGCAGGAGGATTGCTTGAGCCCTGGAGTTGAAGGC	Intron (ENST00000648983.1/127428, intron 2 of 5)	1	54054134	54096493	42360	1	127428	ENST00000371331.1	12019	ENSG00000116205	TCEANC2	transcription elongation factor A N-terminal and central domain containing 2	0.0634876	0.603103	1.63072	0.825938	0.951591	-0.19069	0.399235	0.84435	0.820874	0.362189	0.761294	-0.755475	0.0063881	0.476039	2.14739	0.761958	0.915692	0.350537
chr1	54619848	54619990	143	chr1:54619848-54619990	4	TGGCAGCTGGACTTACTGTTCAGGGCAGCTGTCATGGCTTTCTTGCTGTTGGCTGCGTGGTACCAGGTGACCTCCAAGGCATCTCGCCGGCTGATCTGGCCCAGGCTCAGCAGGTAGTCCAGCATGTCGGCATCAGGGCTGCA	Exon (ENST00000302250.7/338094, exon 2 of 8)	1	54609181	54623525	14345	2	338094	ENST00000302250.7	3535	ENSG00000162391	FAM151A	family with sequence similarity 151 member A	0.035551	0.603103	26.0754	0.862149	0.951591	0.683327	0.0628079	0.726107	25.7327	0.851522	0.940684	0.170823	0.0780638	0.633848	1.89519	0.892126	0.986213	0.935451
chr1	54943334	54943475	142	chr1:54943334-54943475	0	GTTGAGCCTGCAGGTGCACAGAAGTCAAGAACTGAGGTTTGGGAACCTCTGCCTAGAATTCAGAGGATGTATGGAAACACCTGGATGTTCAGGCAAAAATTTTCTGCAGGTGTGGGGCCCTCATGGAGAACCTCTGCTGGGG	Intron (ENST00000689429.1/ENST00000689429.1, intron 1 of 1)	1	54975195	54980452	5258	2	105378736	ENST00000641734.1	36977	ENSG00000284601	LOC105378736	uncharacterized LOC105378736	0.972134	1	1.25004	0.389207	0.704072	-22.1831	0.690137	0.845217	0.286566	0.753887	0.879899	0.455285	0.614107	0.806744	2.17965	0.350384	0.781216	-23.0215
chr1	54943475	54943616	142	chr1:54943475-54943616	1	GCAGTGGTTCTCAGTGGCCCCCTGGCACAGAGTCCCTACTGGGGCCCTGCCTAGTGGAGCTGTGAGAAGAGAACCACTATCCTCCAGACCCCAGAATGATAGATCACCAACAGCTTGCACCATGCACCGGGAAAAGCTGCAG	Intron (ENST00000689429.1/ENST00000689429.1, intron 1 of 1)	1	54975195	54980452	5258	2	105378736	ENST00000641734.1	36836	ENSG00000284601	LOC105378736	uncharacterized LOC105378736	0.972134	1	1.25004	0.389207	0.704072	-22.1831	0.690137	0.845217	0.286566	0.753887	0.879899	0.455285	0.614107	0.806744	2.17965	0.350384	0.781216	-23.0215
chr1	56900067	56900220	154	chr1:56900067-56900220	0	TGGGACTGTAGTCAACATTGCCTCCTTCTTCTGCCTAGCTTCCTTTCTCTAAGCTTCTTTGTAGAATGAGGTAGTCAGGGAATGAGGAGTTGGAAGGCTCCTTTCAGGACTACCATTGGCTACACACCATGCATGATGAATGTTCCTCTGCAGA	Intron (ENST00000695677.1/731, intron 7 of 10)	1	56911845	56918109	6265	1	731	ENST00000695687.1	-11625	ENSG00000157131	C8A	complement C8 alpha chain	0.323959	0.603103	1.35683	0.59997	0.907459	-0.311181	0.470705	0.84435	0.940593	0.168133	0.682531	-0.880051	0.257721	0.704731	1.19885	0.796743	0.939846	0.256696
chr1	57964818	57964960	143	chr1:57964818-57964960	0	AAGGAAAGAGGGAGGCAGGAAGTTGTTCACTGTCTAGGGGAAGATAGGCATGTAAACAGTGAACTGGGATGGAATAAGGCAAATAAAGGTAGACATTATTTGCTGGGGGAATATTGAGAAATAGACAGTTCCTGGCAACTGCA	Intron (ENST00000485760.5/1600, intron 5 of 20)	1	57826071	57884085	58015	2	1600	ENST00000477280.1	-80733	ENSG00000173406	DAB1	DAB adaptor protein 1	1	1	-2.91343	0.205257	0.704072	-24.2293	0.720045	0.863081	-0.154875	0.61507	0.879899	-0.27158	0.689972	0.838465	-3.32961	0.173516	0.781216	-24.6046
chr1	58249768	58250053	286	chr1:58249768-58250053	28	GAGCAAGAGCCGCTTGTCTCGGGGGATTCCGCTTGGGGGGTTCCCAGGGGTCGCCCTGGCGCTCCGGCCACAACTTGGGCGGCTCTGTGCGGCGGCCCTCGCCTGCGCCTTTGCGCGCCACCCAAAACTTTGCGCACACTGCAGCCGCCGCCTTCCCGCTCTTCGCGGTGAGACGCGCGCCGCCAAGTGCCGCAGGCAGCCCTCCACAGCCGCCGCGGCAGCCGCTGCCTGGCTTCTGGCTCCAGACTTTTCCCCCACTGCCTCCAGTTCCCACCCAGGAGGCTCC	Intron (ENST00000485760.5/1600, intron 4 of 20)	1	58462552	58506199	43648	2	115209	ENST00000460671.1	256146	ENSG00000162600	OMA1	OMA1 zinc metallopeptidase	0.348734	0.603103	-0.66736	0.891077	0.951591	2.77124	0.0920896	0.726107	-1.63083	0.590902	0.879899	3.08753	0.744146	0.869065	0.262251	0.813506	0.943903	0.406641
chr1	58250147	58250305	159	chr1:58250147-58250305	20	CTAGACGGACAGGCGCCCGCGGCCGCCCCTACCCCGGCGCGCCCACCTCGAGCCTCTCACGCCGCGGCGGGCGGGCGCAACATATTCTCCTACCTCCAGCCGCCGAGGACCACACTCTCCGCTCAGCCCTCTCGACTCATCCTCCGGCTGCAGTAGAGG	Intron (ENST00000485760.5/1600, intron 4 of 20)	1	58462552	58506199	43648	2	115209	ENST00000460671.1	255894	ENSG00000162600	OMA1	OMA1 zinc metallopeptidase	0.348734	0.603103	-1.95997	0.891077	0.951591	2.77124	0.0920896	0.726107	-2.92345	0.590902	0.879899	4.0663	0.744146	0.869065	-1.03036	0.813506	0.943903	-0.885973
chr1	58274101	58274276	176	chr1:58274101-58274276	2	TCCAGTTTTTCTGTTCTGTTTTTTCCCCATCTTTGTGGTTTTATCTACTTTTGGTCTTTGATGATGGTGATGTACAGATGGGTTTTCGGTGTGGATGTCCTTTCTGTTAATTTTCCTTCTAACAGACAGGACCCTCAGCTGCAGGTCTGTTGGAATACCCTGCCGTGTGAGGTGTC	Intron (ENST00000485760.5/1600, intron 4 of 20)	1	58462552	58506199	43648	2	115209	ENST00000460671.1	231923	ENSG00000162600	OMA1	OMA1 zinc metallopeptidase	0.644036	0.849049	0.108892	0.461936	0.75726	1.99801	0.917018	0.999197	-0.0454035	0.18321	0.682531	2.71082	0.416077	0.806744	0.212669	0.865928	0.980814	-0.223549
chr1	58274276	58274451	176	chr1:58274276-58274451	3	CAGTGTGCCCCTGCTGGGGGGTGCCTCCCAGTTAGGCTGCTCGGGGGTCAGGGGTCAGGGACCCACTTGAGGAGGCAGTCTGCCGGTTCTCAGATCTCCAGCTGCGTGCTGGGAGAACCACTGCTCTCTTCAAAGCTGTCAGACAGGGACACTTAAGTCTGCAGAGGTTACTGCTG	Intron (ENST00000485760.5/1600, intron 4 of 20)	1	58462552	58506199	43648	2	115209	ENST00000460671.1	231748	ENSG00000162600	OMA1	OMA1 zinc metallopeptidase	0.644036	0.849049	0.108892	0.461936	0.75726	1.99801	0.917018	0.999197	-0.0454035	0.18321	0.682531	2.71082	0.416077	0.806744	0.212669	0.865928	0.980814	-0.223549
chr1	58378266	58378442	177	chr1:58378266-58378442	3	GAGTTTCCCGTTTTTCTGTTCTGTTTTTTCCCCATCTTTGTGGTTTTATCTACTTTTGGTCTTTGATGATGGTGATGTACAGATGGGTTTTCGGTGTGGATGTCCTTTCTGTTTGTTAGTTTTCCTTCTAACAGACAGGACCCTCAGCTGCAGGTCTGTTGGAATACCCTGCCGTGT	Intron (ENST00000485760.5/1600, intron 3 of 20)	1	58462552	58506199	43648	2	115209	ENST00000460671.1	127757	ENSG00000162600	OMA1	OMA1 zinc metallopeptidase	0.646376	0.849312	-0.107569	0.0239886	0.704072	23.9983	0.988124	1	-0.661199	0.0314757	0.576841	24.1605	0.399024	0.806744	0.454206	0.143407	0.781216	0.836381
chr1	58378442	58378618	177	chr1:58378442-58378618	3	TGAGGTGTCAGTGTGCCCCTGCTGGGGGGTGCCTCCCAGTTAGGCTGCTCGGGGGTCAGGGGTCAGGGACCCACTTGAGGAGGCAGTCTGCCGGTTCTCAGATCTCCAGCTGCGTGCTGGGAGAACCACTGCTCTCTTCAAAGCTGTCAGACAGGGACACTTAAGTCTGCAGAGGTT	Intron (ENST00000485760.5/1600, intron 3 of 20)	1	58462552	58506199	43648	2	115209	ENST00000460671.1	127581	ENSG00000162600	OMA1	OMA1 zinc metallopeptidase	0.646376	0.849312	-0.107569	0.0239886	0.704072	23.9983	0.988124	1	-0.661199	0.0314757	0.576841	24.1605	0.399024	0.806744	0.454206	0.143407	0.781216	0.836381
chr1	58623547	58623693	147	chr1:58623547-58623693	7	CAGGGCAATGAGGGGCTTAGCACCCAGGCCAGCGGCTGCGGAGGGTGTACTGGGTCCCCCAGCAGTGCCAGCCCACCAGCGCTGAGCTCGATTTCTCACCAGGCCTTAGCTGCCTTTCCGCGGGGCAGGGCTCGAGACCTGCAGCCC	Distal Intergenic	1	58655077	58661694	6618	2	114803	ENST00000697256.1	38001	ENSG00000162601	MYSM1	Myb like, SWIRM and MPN domains 1	NA	NA	0	0.945411	0.951591	0.229787	0.306975	0.726107	23.5943	0.717538	0.879899	-0.770213	0.325495	0.704731	-23.5578	0.596098	0.781216	1.09854
chr1	58623693	58623839	147	chr1:58623693-58623839	13	CGCCATGCCTGAGCCTCCCACCCCCTCCATGGGCTCCTGTGCGGCCCAAGCCTCCCCGATGAGCGCCGCCCCCTGCTCCACGGCGCCCAGTCCCATCGACCACCCAAGGGCTGAGGAATGCGGGCGCACGGCGCGGGACTGGCAGGC	Distal Intergenic	1	58655077	58661694	6618	2	114803	ENST00000697256.1	37855	ENSG00000162601	MYSM1	Myb like, SWIRM and MPN domains 1	NA	NA	0	0.945411	0.951591	0.0371415	0.306975	0.726107	23.6954	0.717538	0.879899	-0.962858	0.325495	0.704731	-23.6589	0.596098	0.781216	0.905897
chr1	58623839	58623985	147	chr1:58623839-58623985	3	CAGCTCCACCTGCAGCCCAGTGCCGCATCCACTGGGTGAAGCCAGCTGGGCTCCTGAGTCTGGTGGGGACGTGGAGAACCTTTATGTCTAGCTCAGGGATTGTAAATACACCAATCGGCACTCTGTATCTAGCTCAAAGTTTGTAAA	Distal Intergenic	1	58655077	58661694	6618	2	114803	ENST00000697256.1	37709	ENSG00000162601	MYSM1	Myb like, SWIRM and MPN domains 1	NA	NA	0	0.945411	0.951591	0.0371415	0.306975	0.726107	23.6954	0.717538	0.879899	-0.962858	0.325495	0.704731	-23.6589	0.596098	0.781216	0.905897
chr1	58639089	58639241	153	chr1:58639089-58639241	0	TCTGCAGTACATATTTCCTTAATTCATTTATCTCCTTTATTTTTCTCTAGGGTCATTTGTCAACATTTTATCATTCTGACCCTCCTAGCAACCCTTTTGACAGAGGTATTATTATTCTAGCATGTAAAGATGGAGAGTGGAGGCTTAGACAGT	Distal Intergenic	1	58655077	58661694	6618	2	114803	ENST00000697256.1	22453	ENSG00000162601	MYSM1	Myb like, SWIRM and MPN domains 1	0.329114	0.603103	23.8751	0.292615	0.704072	24.3115	0.306975	0.726107	24.1042	0.27781	0.682531	24.1417	0.649975	0.806744	0.63758	0.561579	0.781216	1.50681
chr1	59472231	59472436	206	chr1:59472231-59472436	13	CGGCTCCACCGGCCCAGGGCAGTGAGGGGCTTAGCACCTGGGCCAGCAGCTGCTGTGCTCAATTTCTCGAGGGGCCTTAGCTGCCTTCCCGCGGGGCAGGGCTCGGAACCTGCAGCCCGCCATGCCTGAGCCTCCCCCTGTTCCGTGGGCTCCTGTGGGGCCCGAGCCTCCCTGACGAGCGCCGCCCCCTGCTCCACGGAGCCTAG	Intron (ENST00000634606.1/55277, intron 5 of 16)	1	59512316	59660423	148108	1	55277	ENST00000485720.1	-39880	ENSG00000172456	FGGY	FGGY carbohydrate kinase domain containing	0.152084	0.603103	24.7598	0.205257	0.704072	-24.5581	0.306975	0.726107	23.7963	0.070489	0.576841	-24.5581	0.0464076	0.476039	24.7598	0.350384	0.781216	-23.6894
chr1	59472436	59472641	206	chr1:59472436-59472641	8	GTCCCATCGACCACCCAAGGGCTGAGGAATGCGGGCGCACGGCGCGGGACTGGCAGGCAGCTCCACCTGCAGCCCCGGTGCGGGATCCACTGGGTGAAGCCAGCTGGGCTCCTGAGTCTGGTGGGGACATGGAGAACCTTTATGTCTAGATCAGGGATTGTAAATACACCAATTGGCACTCTGTATCTAGGTCAAGGTTTGTAAAC	Intron (ENST00000634606.1/55277, intron 5 of 16)	1	59512316	59660423	148108	1	55277	ENST00000485720.1	-39675	ENSG00000172456	FGGY	FGGY carbohydrate kinase domain containing	0.152084	0.603103	24.7598	0.205257	0.704072	-24.5581	0.306975	0.726107	23.7963	0.070489	0.576841	-24.5581	0.0464076	0.476039	24.7598	0.350384	0.781216	-23.6894
chr1	59652839	59653012	174	chr1:59652839-59653012	2	GATTTTCCAGTTTTTCTGTTCTGTTTTTTCCCCATGTTTGTGGTTTTATCTACTTTTGGTCTTTGATGATGGTGGTGTACAGATGGGTTTTCGGTGTGGATGTCCTTTCTGTTTGTTAGTTTTCCTTCTAACAGACAGGACCCTCAGCTGCAGGTCTGTTGGAATACCCTGCCG	Intron (ENST00000634606.1/55277, intron 9 of 16)	1	59660219	59767675	107457	1	55277	ENST00000476939.5	-7207	ENSG00000172456	FGGY	FGGY carbohydrate kinase domain containing	0.353872	0.603103	-21.3671	0.389207	0.704072	-21.2358	0.690137	0.845217	1.78558	0.753887	0.879899	1.9543	0.325495	0.704731	-23.3255	0.350384	0.781216	-23.2551
chr1	59653012	59653185	174	chr1:59653012-59653185	4	GTGTGAGGTGTCAGTGTGCTCCTGCTGGGGGGTGCCTCCCAGTTAGGCTGCTCGTGGGTCAGGGTTCAGCGACCCACTTGAGGAGGCAGTCTGCGGGTTCTCAGATCTCCAGCTGCGTGCTGGGAGAACCACTGCTCTCTTCAAAGCTGTCAGACAGGGACATTTAAGTCTGCA	Intron (ENST00000634606.1/55277, intron 9 of 16)	1	59660219	59767675	107457	1	55277	ENST00000476939.5	-7034	ENSG00000172456	FGGY	FGGY carbohydrate kinase domain containing	0.353872	0.603103	-21.3671	0.389207	0.704072	-21.2358	0.690137	0.845217	1.78558	0.753887	0.879899	1.9543	0.325495	0.704731	-23.3255	0.350384	0.781216	-23.2551
chr1	59969490	59969639	150	chr1:59969490-59969639	3	TGTTTACAAACCTTGAGCTAGATACAGAGTGCGGATTGGTGTATTTACAATCCCTGAGCTAGACATAAAGGTTCTTCACCTCCCCACCAGACTCAGGAGCCCAGCTGGCTTCACCCAGTGGATCCGCACCGGGGCTGCAGGTGGAGCTGC	Distal Intergenic	1	59990397	60008845	18449	2	127795	ENST00000488027.5	39206	ENSG00000162598	C1orf87	chromosome 1 open reading frame 87	0.329114	0.603103	24.3583	0.123414	0.704072	25.1867	0.203351	0.726107	24.2111	0.176959	0.682531	24.2486	0.983438	1	1.39426	0.170235	0.781216	5.65641
chr1	59969639	59969788	150	chr1:59969639-59969788	13	CCTGCCAGTTCCGTGCCGTGCGCCCAGCACTCCTCAGCCCTTGGGTGGTCGATGGGACTGGGCGCCGTGGAGCAGGGGGCGGCGCTTATCGGGGAGGCTCGGGCCGCACAGGAGCCCACGGAACAGGGGGAGGCTCAGGCATGGCGGGCT	Distal Intergenic	1	59990397	60008845	18449	2	127795	ENST00000488027.5	39057	ENSG00000162598	C1orf87	chromosome 1 open reading frame 87	0.329114	0.603103	24.5103	0.123414	0.704072	25.2787	0.203351	0.726107	24.2994	0.176959	0.682531	24.3369	0.983438	1	1.54626	0.170235	0.781216	5.74843
chr1	59969788	59969937	150	chr1:59969788-59969937	12	TGCAGGTCCCGAGCCGTGCCTCGCAGGAAGGCAGCTAAGACCCGGTGAGAAATCGAGCACAACGCCGGTGGGCTGGCACTGCTGGGGGACCCAGTACACCCTCCGCAGCCGCTGGCCCGGGTGCTAAGCCCCTCACTGCCCGGGGCGGGC	Distal Intergenic	1	59990397	60008845	18449	2	127795	ENST00000488027.5	38908	ENSG00000162598	C1orf87	chromosome 1 open reading frame 87	0.329114	0.603103	24.5103	0.123414	0.704072	24.9345	0.203351	0.726107	23.9705	0.176959	0.682531	24.0079	0.983438	1	2.5508	0.170235	0.781216	5.40424
chr1	59974784	59974971	188	chr1:59974784-59974971	0	GCTGCAGTGCAGTGGCTATCCACAGGCACAATCCCACTACTGATCAGCACTGGGGTTTTGGCCTGCTTTGTTTCCAAACTGCACCAGTTCACCCCTCCTTAGGCAATCTAGTAATCCCTGGTTTCTAGAAGGTCATCACATTGATGCTGAACTTAGTGGGGGCACCCTATGAGCATAGCTTACTGCAG	Exon (ENST00000583379.2/ENST00000583379.2, exon 1 of 1)	1	59990397	60008845	18449	2	127795	ENST00000488027.5	33874	ENSG00000162598	C1orf87	chromosome 1 open reading frame 87	0.152084	0.603103	23.1658	0.123414	0.704072	23.2398	0.306975	0.726107	22.2023	0.27781	0.682531	22.2398	0.0464076	0.476039	23.1658	0.0361852	0.781216	23.2398
chr1	62013993	62014138	146	chr1:62013993-62014138	3	TGAGTTCCTGACCTCAAATGATCCGCCCACCTCGGCCTCCCAAAGTACTGGGATTACAGGCATGGGCAACCGCACCCAGCCCCCCATTCTTCTCACTCTGTCAATCAGCCTGGAGTACAGTAGTACAGTCATAGCTCACTGCAGTC	Intron (ENST00000635214.1/10207, intron 28 of 35)	1	61952312	62117393	165082	1	10207	ENST00000307297.8	61681	ENSG00000132849	PATJ	PATJ crumbs cell polarity complex component	0.353872	0.603103	-24.5186	0.205257	0.704072	-25.1002	0.65379	0.845217	-1.53893	0.070489	0.576841	-25.1002	0.325495	0.704731	-24.3019	0.350384	0.781216	-24.2315
chr1	62014138	62014283	146	chr1:62014138-62014283	1	CTTTAACTCCTGGACTGAAGCGATCCTCCCACCTCAGCTTCCTCTGAGTAGCTGGAATTACAGGCACACATCACCATAACTGGTTAACTTTTTATTATTTTTTTGTAGAGACAGGGTCTTTCTGTGTTGCCCAGGCTGGTCTCAGA	Intron (ENST00000635214.1/10207, intron 28 of 35)	1	61952312	62117393	165082	1	10207	ENST00000307297.8	61826	ENSG00000132849	PATJ	PATJ crumbs cell polarity complex component	0.353872	0.603103	-24.5186	0.205257	0.704072	-25.1002	0.65379	0.845217	-1.53893	0.070489	0.576841	-25.1002	0.325495	0.704731	-24.3019	0.350384	0.781216	-24.2315
chr1	62114050	62114201	152	chr1:62114050-62114201	3	CAGGTTAATGGGGTTGACCTGAGGAACTCCAGCCACGAAGAAGCCATCACAGCCCTGAGGCAGACCCCCCAGAAGGTGCGGCTGGTGGTGTATAGAGATGAGGCACACTACCGGGATGAGGAGAACTTGGAGATTTTCCCTGTGGATCTGCA	Promoter (<=1kb)	1	62114090	62117395	3306	1	10207	ENST00000465798.2	0	ENSG00000132849	PATJ	PATJ crumbs cell polarity complex component	0.154943	0.603103	-2.98238	0.692012	0.951591	-0.581982	0.0256908	0.726107	-3.94585	0.950117	0.960572	0.285213	0.481852	0.806744	-2.05276	0.589105	0.781216	-1.01274
chr1	62222344	62222526	183	chr1:62222344-62222526	4	GGCTGCAGCAGGAGGATTGCTTGAGCTCCGGAGTTTAAGACCAGCCTAGGCAATATAGTGAGACCCTGTCTCCACAATACATTACAAAATCTGGCCAGGTGTGGTGATGTGCGCCTGTAGTCCTAGCTACTCGAGAGGCTGAGGTAGGAGGATTGTATGAGCCCAGGAGGTCGAGGCTGCAGT	Distal Intergenic	1	62194849	62212328	17480	1	54596	ENST00000498273.2	27495	ENSG00000240563	L1TD1	LINE1 type transposase domain containing 1	0.173089	0.603103	-23.7724	0.692012	0.951591	-0.0684669	0.250573	0.726107	-1.23719	0.301844	0.682531	-1.06847	0.22065	0.681513	-23.6809	0.950293	0.986213	0.800288
chr1	62327528	62327697	170	chr1:62327528-62327697	7	CCAGGGACGCGCCCCATTCCGCCCAGGACTCTGTCTCCCTCCCGTTGCCATTCACGGACTCGAGGCTCAGCCCCAACCCTGCTCCAAGATCTGAGCCGGCAGCAGGAGTGGAGAGAGGCCAGGCAGTGGGAGCAGACACCCCTGAGTCTGCAGGGATGATGTGTGGGGGT	Distal Intergenic	1	62236165	62319434	83270	2	163782	ENST00000371153.9	-8094	ENSG00000132854	KANK4	KN motif and ankyrin repeat domains 4	0.329114	0.603103	24.4453	0.205257	0.704072	-24.5088	0.306975	0.726107	23.747	0.070489	0.576841	-24.5088	0.614107	0.806744	3.30924	0.350384	0.781216	-23.6401
chr1	62327697	62327866	170	chr1:62327697-62327866	6	TGGAGGTCGTCTCCCCAGGACCAGAGGGTGCAGGCTACAGAGATGCCCAGGTCCTGTGCCTGGGAGAGCAGCCAGGGGAGCTCCCGCCCCGGCCAACTCGTAAGGGGCGGGGCTCCTGTTTGTCTCTGGCTTCTGTCTGCTCTGTGGAGCGGGAAGCCCAGGTCTGCAGC	Distal Intergenic	1	62236165	62319434	83270	2	163782	ENST00000371153.9	-8263	ENSG00000132854	KANK4	KN motif and ankyrin repeat domains 4	0.329114	0.603103	24.9758	0.205257	0.704072	-24.9628	0.306975	0.726107	24.201	0.070489	0.576841	-24.9628	0.614107	0.806744	3.83975	0.350384	0.781216	-24.0941
chr1	62327866	62328035	170	chr1:62327866-62328035	4	CTGCTGGTCGGGTAGCTGTAGCTGCACCCAGGAGGGCAGATCCTGCCTGCTCCCGGGACCCCCACCAAGAGCACAGGCTCAGATCCACAGCCGCAGTTTGGGCAGCTGCAGCCCCACTCAGGAGGGCGGGGCTCCTTCCTGATCCATAGAGCAGGAGGCCTGGGTCTGCA	Distal Intergenic	1	62236165	62319434	83270	2	163782	ENST00000371153.9	-8432	ENSG00000132854	KANK4	KN motif and ankyrin repeat domains 4	0.329114	0.603103	22.8604	0.205257	0.704072	-23.3416	0.306975	0.726107	22.5797	0.070489	0.576841	-23.3416	0.614107	0.806744	1.72427	0.350384	0.781216	-22.4728
chr1	63629274	63629416	143	chr1:63629274-63629416	1	CTGCAGATTTTTATTAAATAAAATCTTTTCTTGTCCAACAGATTATTACTATTATTTTTTTGTCCATCTGCCTGTTGTCTTGGTGTTGTTTCTGAGCGGTGACTCTGGATGTATTGATGTTAAAGAGTGTGTTCTGGATTTCT	Intron (ENST00000650546.1/5236, intron 1 of 11)	1	63623093	63660221	37129	1	5236	ENST00000371083.4	6181	ENSG00000079739	PGM1	phosphoglucomutase 1	0.152084	0.603103	24.1356	0.461936	0.75726	1.10218	0.203351	0.726107	23.6054	0.889459	0.940684	0.102182	0.205398	0.681513	2.51339	0.183554	0.781216	1.97094
chr1	65549393	65549536	144	chr1:65549393-65549536	2	CTGCAGAGTGTTTTCCAACTTGGTTCCATTCTCCAAGTTGGTCACTTTCAGGTACACCAATCAGACGCAGATTTGGTCTTTTCACATAGTCCCATATTTCTTGGAGGCTTTGTTCGTTTCTTTTTATTCTTTTTTCTCTAAACT	Intron (ENST00000371059.7/3953, intron 2 of 19)	1	65565546	65626234	60689	1	3953	ENST00000371058.1	-16010	ENSG00000116678	LEPR	leptin receptor	0.581934	0.813605	1.60473	1	1	0.111159	0.503569	0.845217	1.46245	0.517731	0.879899	-0.431098	0.790698	0.89887	0.846712	0.661368	0.835374	0.565065
chr1	65563640	65563804	165	chr1:65563640-65563804	1	GAGTTTCCAGTTTTTCTGTTCTGTTTTTTCCCCATCTTTGTGGTTTTATCTACTTTTGGTCTTTGATGATGGTGATGTACAGATGGGTTTTCGGTGTGGATGTCCTTTCTGTTTGTTAGTTTTCCTTCTAACAGACAGGACCCTCAGCTGCAGGTCTGTTGGAAT	Promoter (1-2kb)	1	65565546	65626234	60689	1	3953	ENST00000371058.1	-1742	ENSG00000116678	LEPR	leptin receptor	1	1	-2.7244	0.650754	0.941196	-3.00535	0.517875	0.845217	0.0181301	0.875719	0.940684	-1.33056	0.481852	0.806744	-3.24713	0.566733	0.781216	-2.77262
chr1	65563804	65563968	165	chr1:65563804-65563968	4	TACCCTGCCGTGTGAGGTGTCAGGGTGCTCCTGCTGGGGGGTGCCTCCCAGTTAGGCTGCTCGGGGGTCAGGGGTCAGGAACCCACTTGAGGAGGCAGTCTGCCGGTTCTCAGATCTCCAGCTGCGTGCTGGGAGAGCCACTGCTCTCTTCAAAGCTGTCAGACA	Promoter (1-2kb)	1	65565546	65626234	60689	1	3953	ENST00000371058.1	-1578	ENSG00000116678	LEPR	leptin receptor	1	1	-2.7244	0.650754	0.941196	-3.00535	0.517875	0.845217	0.0181301	0.875719	0.940684	-1.33056	0.481852	0.806744	-3.24713	0.566733	0.781216	-2.77262
chr1	65563968	65564132	165	chr1:65563968-65564132	1	AGGGACATTTAAGTCTGCAGAGGTTACTGCTGTCTTTTTGTTTGTCTGTGCCCTGCCCCCAGAGGTGGAGCCTACAGAGGCAGGCAGGCCTCCTTGAGCTGTGGTGGGCTCCACCCAGTTGGAGCTTCCCGCTGCTTTGTTTACCTGATCAAGCCTGGGCAATGG	Promoter (1-2kb)	1	65565546	65626234	60689	1	3953	ENST00000371058.1	-1414	ENSG00000116678	LEPR	leptin receptor	1	1	-2.7244	0.650754	0.941196	-3.00535	0.517875	0.845217	-0.11336	0.851129	0.940684	-1.55394	0.481852	0.806744	-3.15807	0.566733	0.781216	-2.68238
chr1	67083982	67084157	176	chr1:67083982-67084157	2	GAGTTTCCAGTTTTTCTGTTCTGTTTTTTCCCCATCTTTGTGGTTTTATCTACTTTTGGTCTTTGATGATGGTGATGTACAGATGGGTTTTCGGTGTAGATGTCCTTTCTGGTTGTTAGTTTTCCTTCTAACAGACAGGACCCTCAGCTGCAGGTCTGTTGGAATACCCTGCCGTG	Distal Intergenic	1	66999350	67054148	54799	2	23169	ENST00000235345.6	-29834	ENSG00000116704	SLC35D1	solute carrier family 35 member D1	0.227745	0.603103	1.17851	0.146142	0.704072	-1.37432	0.565866	0.845217	0.460726	0.512545	0.879899	-0.802178	0.0876497	0.681513	1.62247	0.101446	0.781216	-1.20941
chr1	67084157	67084332	176	chr1:67084157-67084332	3	GTGAGGTGTCAGTGTGCCCCTGCTGGGGGGTGCCTCCCAGTTAGGCTGCTCGGGGGTCAGGAGTCAGGGACCCACTTGAGGAGGCAGTCTGCCCGTTCTCAGATCTCCAGCTGCGTGCTGGGAGAACCACTGCTCTCTTCAAAGCTGTCAGACAGGGACACTTAAGTCTGCAGAGG	Distal Intergenic	1	66999350	67054148	54799	2	23169	ENST00000235345.6	-30009	ENSG00000116704	SLC35D1	solute carrier family 35 member D1	0.227745	0.603103	1.17851	0.146142	0.704072	-1.37432	0.565866	0.845217	0.460726	0.512545	0.879899	-0.802178	0.0876497	0.681513	1.62247	0.101446	0.781216	-1.20941
chr1	67342992	67343143	152	chr1:67342992-67343143	1	CAGCTCACTGCAGCCTTCACCTCCTGTGCTCAAGTGATCCTCCCACCTCAGCCTCCCAAGTAGCTGAGACTACAGGCATCCATCACCACGCCCAGCTAATTTTTGTTTGTCACAGAGACAGGGTCTCATTCTGTCCCCCAGGCTGAAGTGTG	Promoter (<=1kb)	1	67343724	67397023	53300	1	3595	ENST00000696763.1	-581	ENSG00000081985	IL12RB2	interleukin 12 receptor subunit beta 2	1	1	-0.215434	0.389207	0.704072	-22.1572	1	1	-0.681023	0.920918	0.940684	-0.512304	1	1	0.294025	0.244564	0.781216	-22.3983
chr1	67343143	67343294	152	chr1:67343143-67343294	1	GGTGGCACAATCTCAGCTCACTGCAGCCTTCACCTCCTGTGCTCAAGTGATCCTCCCACCTCAGCCTCCCAAGTAGCTGAGACTACAGGCATCCATCACCACGCCCAGCTAATTTTTGTCACAGAGACAGGGTTTCACCATGTTGCCCAGGC	Promoter (<=1kb)	1	67343724	67397023	53300	1	3595	ENST00000696763.1	-430	ENSG00000081985	IL12RB2	interleukin 12 receptor subunit beta 2	1	1	-0.215434	0.389207	0.704072	-22.1572	1	1	-0.681023	0.920918	0.940684	-0.512304	1	1	0.294025	0.244564	0.781216	-22.3983
chr1	68739196	68739370	175	chr1:68739196-68739370	1	GAGTTTCCAGTTTTTCTGTTCTGTTTTTTCCCCATCTTTGTGGTTTTATCTACTTTTGGTCTTTGATGATGGTGATGTACAGATGGGTTTTCAGTGTAGATGTCCTTTCTGGTTGTTAGTTTTCCTTCTAACAGACAGGACCCTCAGCTGCAGGTCTGTTGGAATACCCTGCCGT	Intron (ENST00000643361.1/ENST00000643361.1, intron 2 of 6)	1	68474152	68497221	23070	2	55635	ENST00000370966.9	-241975	ENSG00000024526	DEPDC1	DEP domain containing 1	0.0899239	0.603103	0.643628	0.588898	0.895262	-0.734716	0.320323	0.751135	0.402648	0.591284	0.879899	-0.789621	0.0635927	0.578892	0.597127	0.749053	0.912001	-0.411287
chr1	68739370	68739544	175	chr1:68739370-68739544	3	TGTGAGGTGTCAGTGTGCCCCTGCTGGGGGGTGCCTCCCAGTTAGGCTGCTCGGGGGTCAGGGGTCAGGGACCCACTTGAGGAGGCAGTCTGCCCGTTCTCAGATCTCCAGCTGCGTGCTGGGAGAACCACTGCTCTCTTCAAAGCTGTCAGACAGGGACACTTAAGTCTGCAGA	Intron (ENST00000643361.1/ENST00000643361.1, intron 2 of 6)	1	68474152	68497221	23070	2	55635	ENST00000370966.9	-242149	ENSG00000024526	DEPDC1	DEP domain containing 1	0.0899239	0.603103	0.643628	0.588898	0.895262	-0.734716	0.320323	0.751135	0.402648	0.591284	0.879899	-0.789621	0.0635927	0.578892	0.597127	0.749053	0.912001	-0.411287
chr1	68880867	68881040	174	chr1:68880867-68881040	0	GAGTTTCCAGTTTTTCTATTCTGTTTTTTCCCCATCTTTGTGGTTTTATCTACTTTTGGTCTTTGATGATGGTGATGTACAGGTGGGCTTTTGGTGTGGATGTCCTTTCTGTTTGTTAGTTTTCCTTCTAACAGACAGGACCCTCAGCTGCAGGTCTGTTGGAATACCCTGCCT	Intron (ENST00000643361.1/ENST00000643361.1, intron 4 of 6)	1	69055838	69229597	173760	1	105378787	ENST00000658427.1	-174798	NA	LOC105378787	uncharacterized LOC105378787	0.3233	0.603103	-3.19303	0.242795	0.704072	-2.89997	0.219227	0.726107	-3.03653	0.0452952	0.576841	-3.89997	0.502466	0.806744	-2.42975	0.589105	0.781216	-2.03121
chr1	68881040	68881213	174	chr1:68881040-68881213	3	TTGTGAGGTGTCAGTGTGCCCCTGCTGGGGGGTGCCTCCCAGTTAGGCTGCTCGGGGGTCAGGGGTCAGGGACCCACTTGAGGAGGCAGTCTGCCCGTTCTCAGATCTCCAGCTGCGTGCTGGGAGAACCACTGCTCTCTTCAAAGCTGTCAGACAGGGACACTTAAGTCTGCA	Intron (ENST00000643361.1/ENST00000643361.1, intron 4 of 6)	1	69055838	69229597	173760	1	105378787	ENST00000658427.1	-174625	NA	LOC105378787	uncharacterized LOC105378787	0.3233	0.603103	-3.19303	0.242795	0.704072	-2.89997	0.219227	0.726107	-3.03653	0.0452952	0.576841	-3.89997	0.502466	0.806744	-2.42975	0.589105	0.781216	-2.03121
chr1	68881213	68881386	174	chr1:68881213-68881386	4	AGAGGTTACTGCTGTCTTTTTGTTTGTCTGTGCCCTGCCCCCAGAGGTGGAGCCTACAGAGGCAGGCAGGCCTCCTTGAGCTGTGGTGGGCTCCACCCAGTTCGAGCTTCCAGGCTGCTTTGTTTACCTAATCAAGCCTGGGCAATGGCGGGCGCCCCTCCCCCAGCCTCGCTG	Intron (ENST00000643361.1/ENST00000643361.1, intron 4 of 6)	1	69055838	69229597	173760	1	105378787	ENST00000658427.1	-174452	NA	LOC105378787	uncharacterized LOC105378787	0.3233	0.603103	-2.97979	0.242795	0.704072	-2.70824	0.219227	0.726107	-2.82328	0.0452952	0.576841	-3.70824	0.502466	0.806744	-2.24131	0.589105	0.781216	-1.83948
chr1	68924074	68924250	177	chr1:68924074-68924250	3	GTAACCTCTGCAGACTTAAGTGTCCCTGTCTGACAGCTTTGAAGAGAGCAGTGGTTCTCCCAGCACGCAGCTGGAGATCTGAGAACGGGCAGACTGCCCCCTCAAGTGGGTCCCTGACCCCTGACCCCCGAGCAGCCTAACTGGGAGGCACCCCCCAGCAGGGGCACACTGACACCT	Intron (ENST00000643361.1/ENST00000643361.1, intron 6 of 6)	1	69055838	69229597	173760	1	105378787	ENST00000658427.1	-131588	NA	LOC105378787	uncharacterized LOC105378787	1	1	0.589331	0.773669	0.951591	0.528346	0.582111	0.845217	0.137111	0.900509	0.940684	0.225682	0.613387	0.806744	0.832421	0.665184	0.839166	0.597607
chr1	68924250	68924426	177	chr1:68924250-68924426	1	TCACAAGGCAGGGTATTCCAACAGACCTGCAGCTGAGGGTCCTGTCTGTTAGAAGGAAAACTAACGAACAGAAAGGATATCCACACCAAAAACCCATCTGTACATCACCATCATCAAAGACCAAAAGTAGATAAAACCACAAAGATGGGGAAAAAACAGAACAGAAAAACTGGAAAC	Intron (ENST00000643361.1/ENST00000643361.1, intron 6 of 6)	1	69055838	69229597	173760	1	105378787	ENST00000658427.1	-131412	NA	LOC105378787	uncharacterized LOC105378787	1	1	0.589331	0.773669	0.951591	0.528346	0.582111	0.845217	0.137111	0.900509	0.940684	0.225682	0.613387	0.806744	0.832421	0.665184	0.839166	0.597607
chr1	70889913	70890128	216	chr1:70889913-70890128	1	TTAATATCATTGCTCTTTTCCTGTCCTTCATCTCCAAATGTTACTCTTGACCCTTTCTGAGTGACTTATTTAACTGAAGTACATTAAACATGCATAAACACTTCATGTCTTTCAGAAACTTCATTTGGCATTTCCATGTTGTACCACTTCAATTCAGCTCAATTCAATGATTACGGCTTAGTCTTTTATACACAGACCACTAGACAAGGTCCTGCA	Intron (ENST00000370931.7/5733, intron 4 of 4)	1	70760382	70786460	26079	1	101927244	ENST00000660283.1	129531	ENSG00000229051	LINC01788	long intergenic non-protein coding RNA 1788	0.282679	0.603103	2.26868	0.684747	0.951591	0.618793	0.363065	0.826181	1.6542	0.838603	0.940684	0.0833311	0.33446	0.719166	2.02453	0.363493	0.781216	0.920116
chr1	71514134	71514306	173	chr1:71514134-71514306	5	ACGAGGCTGGGGAAGGGGCGCCCGCCATTGCCCAGGCTTGCTTAGGTAAACAAAGCAGCCGGGAAGCTCGAACTGGGTGGAGCCCACCACAGCTCAAGGAGGCCTGCCTGCCTCTGTAGGCTCCACCTCTGGGGGCAGGGCACAGACAAACAAAAAGACAGCAGTAACCTCTG	Intron (ENST00000357731.10/257194, intron 6 of 6)	1	71407492	71439838	32347	2	257194	ENST00000474357.1	-74296	ENSG00000172260	NEGR1	neuronal growth regulator 1	0.405828	0.675554	0.602949	0.409444	0.729015	-0.641687	0.787818	0.923808	0.274384	0.218559	0.682531	-0.719456	0.280048	0.704731	0.684821	0.85105	0.966321	-0.332588
chr1	71514306	71514478	173	chr1:71514306-71514478	3	GCAGACTTAAGTGTCCCTGTCTGACAGCTTTGAAGAGAGCAGTGGTTCTCCCAGCACGCAGCTGGAGATCTGAGAACGGGCAGACTGCCTCCTCAAGTGGGTCCCTGACCCCTGACCCCCGGGCAGCCTAACTGGGAGGCACCCCCCAGCAGGGGCACACTGACACCTCACAC	Intron (ENST00000357731.10/257194, intron 6 of 6)	1	71407492	71439838	32347	2	257194	ENST00000474357.1	-74468	ENSG00000172260	NEGR1	neuronal growth regulator 1	0.405828	0.675554	0.602949	0.409444	0.729015	-0.641687	0.787818	0.923808	0.274384	0.218559	0.682531	-0.719456	0.280048	0.704731	0.684821	0.85105	0.966321	-0.332588
chr1	71514478	71514650	173	chr1:71514478-71514650	1	CAGCAGGGTATTCCAACAGACCTGCAGCTGAGGGTCCTGTCTGTTAGAAGGAAAACTAACAACCAGAAAGGACATCTACACCGAAAACCCATCTGTACATCACCATCATCAAAGACCAAAAGTAGATAAAACCACAAAGATGGGGAAAAAACAGAACAGAAAAACTGGAAACT	Intron (ENST00000357731.10/257194, intron 6 of 6)	1	71407492	71439838	32347	2	257194	ENST00000474357.1	-74640	ENSG00000172260	NEGR1	neuronal growth regulator 1	0.405828	0.675554	0.602949	0.459578	0.75726	-0.528174	0.843536	0.971115	0.189877	0.24523	0.682531	-0.605943	0.2642	0.704731	0.791082	0.893302	0.986213	-0.256557
chr1	71888789	71888965	177	chr1:71888789-71888965	3	AGTAACCTCTGCAGACTTAAGTGTCCCTGTCTGACAGCTTTGAAGAGAGCAGTGGTTCTCCCAGCACGCAGCTGGAGATCTGAGAACGGGCAGACTGCCTCCTCAAGTGGGTCCCTGACCCCTGACCCCCGAGCAGCCTAACTGGGAGGCACCCCCCAGCAGGGGCACACTGACACC	Intron (ENST00000357731.10/257194, intron 2 of 6)	1	71794232	71837012	42781	2	100852409	ENST00000453121.1	-51777	ENSG00000228853	NEGR1-IT1	NEGR1 intronic transcript 1	0.294205	0.603103	0.747	0.477024	0.776577	-0.681352	0.587424	0.845217	0.353347	0.323327	0.692152	-0.911987	0.202293	0.681513	0.849476	0.797802	0.940379	-0.259297
chr1	71888965	71889141	177	chr1:71888965-71889141	2	CTCACACGGCAGGGTATTCCAACAGACCTGCAGCTGAGGGTCCTGTCTGTTAGAAGGAAAACTAACAACCAGAAAGGACATCTACACCGAAAACCCATCTGTACATCACCATCATCAAAGACCAAAAGTAGATAAAACCACAAAGATGGGGAAAAAACAGAACAGAAAAACTGGAAA	Intron (ENST00000357731.10/257194, intron 2 of 6)	1	71794232	71837012	42781	2	100852409	ENST00000453121.1	-51953	ENSG00000228853	NEGR1-IT1	NEGR1 intronic transcript 1	0.281177	0.603103	0.855521	0.494826	0.783633	-0.62193	0.575428	0.845217	0.461868	0.331667	0.70642	-0.852565	0.196096	0.681513	0.909637	0.811475	0.943903	-0.215939
chr1	72030966	72031117	152	chr1:72030966-72031117	1	ATTAAGTCGTAAGAGTTTATCTTACATGTTGTGTTTCCTTTGTTGCTTCCATGGGGCAACTGGAGTTAGACTGTCCTGGAAGGCTTTCACATTAACTAACAGGACACCCTGTTCATTGAGAAGAAAAAGAGAGAAAAATATAGCAGCCTGCA	Intron (ENST00000357731.10/257194, intron 1 of 6)	1	71697946	72100917	402972	2	257194	ENST00000467479.1	69800	ENSG00000172260	NEGR1	neuronal growth regulator 1	1	1	-0.00920447	0.945411	0.951591	0.196041	0.65379	0.845217	-0.972679	0.717538	0.879899	-0.803959	0.649975	0.806744	0.920406	0.596098	0.781216	1.0648
chr1	75260742	75261022	281	chr1:75260742-75261022	0	CACTTATTCTAAAATTGACCACATAACTGGAAGTAAAACACTCCTCAGCAAATGCAAAAGAACAGAAATCATAACAAACAGTCTCTCAGACCACAGTGCAATCAAATTAGAACTCAGGACTAAGAAACTCACTCAAAACTGCAGAAGTACATGGAAAGTAGACAACATGCTCCTGAATGACTACTGGGTAAATATTGAAATGAAGGCAGAAATATAGATGTTCTTTGAAACCAATGAGAACAAAGACACACCATACCAGAATCTCTGGGACACATTTAAAG	Intron (ENST00000370859.8/204962, intron 6 of 23)	1	75134388	75161533	27146	1	431707	ENST00000696555.1	126354	ENSG00000162624	LHX8	LIM homeobox 8	0.0590695	0.603103	3.01565	0.84568	0.951591	-0.782779	0.0946291	0.726107	2.48183	0.664149	0.879899	-0.601423	0.098262	0.681513	2.06872	0.989929	0.993677	-0.600003
chr1	77282525	77282676	152	chr1:77282525-77282676	6	GTCGCCTTTCCCGCGGGTTGCCAGGGTCCTTGTCAGAAGGCTGGGCTTAGAAGCCTGCATCTCACAGATCAAGTTTCAGTCTTCCAGCAGGGTTCTGAAAGCAGCCTGCTCCCATCGCGCCCCTCGGATGTGGACACCCAGGGTGGGCTGCA	Promoter (<=1kb)	1	77282602	77559962	277361	1	26289	ENST00000344720.9	0	ENSG00000154027	AK5	adenylate kinase 5	0.299107	0.603103	1.74512	0.940679	0.951591	-0.207778	0.497166	0.845217	1.14883	0.851129	0.940684	-0.809511	0.196302	0.681513	1.72962	0.694449	0.862197	0.365366
chr1	79943480	79943641	162	chr1:79943480-79943641	0	GAGTTTCCAGTTTTTCTGTTCTGTTTTTTCCCCATCTTTGTGGTTTTATCTACTTTTGGTCTTTGATGATGGTGATGTACAGATGGGTTTTTGGTGTGGATGTCCTTTCTGTTTGTTAGTTTTCCTTCTAACAGACAGGACCCTCAGCTGCAGGTCTGTTGG	Distal Intergenic	1	80535755	80646788	111034	1	101927412	ENST00000418041.5	-592114	ENSG00000234184	LINC01781	long intergenic non-protein coding RNA 1781	0.0733743	0.603103	25.0334	0.497092	0.783633	1.04155	0.136921	0.726107	24.2275	0.407154	0.828721	3.16798	0.0755866	0.618083	4.11538	0.7434	0.908329	-1.91233
chr1	79943641	79943802	162	chr1:79943641-79943802	3	GAATACCCTGCCGTGTGAGGTGTCAGTGTGCCCCTGCTGGGGGGTGCCTCCCAGTTAGGCTGCTCGGGGGTGAGGGGTCAGGGACCCACTTGAGGAGGCAGTCTGCCCATTCTCAGATCTCCAGCTGCGTGCTGGGAGAACCACTGCTCTCTTCAAAGCTGT	Distal Intergenic	1	80535755	80646788	111034	1	101927412	ENST00000418041.5	-591953	ENSG00000234184	LINC01781	long intergenic non-protein coding RNA 1781	0.0733743	0.603103	25.2078	0.497092	0.783633	1.04155	0.136921	0.726107	24.3848	0.407154	0.828721	3.32768	0.0755866	0.618083	4.28975	0.7434	0.908329	-2.07949
chr1	79943802	79943963	162	chr1:79943802-79943963	1	TCAGACAGGGACATTTAAGTCTGCAGAGGTTACTGCTGTCTTTTTGTTTGTCTGTGCCCTGCCTCAGAGGTGGAGCCTACAGAGGCAGGCAGGCCTCCTTGAGCTGTGGTGGGCTCCACCCAGTTCGAGCTTCCTGGCTGCTTTATTTACCTAAGCAAGCCT	Distal Intergenic	1	80535755	80646788	111034	1	101927412	ENST00000418041.5	-591792	ENSG00000234184	LINC01781	long intergenic non-protein coding RNA 1781	0.0733743	0.603103	25.0939	0.497092	0.783633	1.04155	0.136921	0.726107	24.2819	0.407154	0.828721	3.2232	0.0755866	0.618083	4.17588	0.7434	0.908329	-1.97023
chr1	80137632	80137792	161	chr1:80137632-80137792	1	TTTAGAGTTTCCAGTTTTTCTGTTCTGTTTTTTCCCCATCTTTGTGGTTTTATCTACTTTTGGTCTTTGATGATCGTGATGTACAGATGGGTTTTTGGTGTGGATGTCCTTTCTGGTTGTTAGTTTTCCTTCTAACAGACAGGACCCTCAGCTGCAGGTCT	Distal Intergenic	1	80535755	80646788	111034	1	101927412	ENST00000418041.5	-397963	ENSG00000234184	LINC01781	long intergenic non-protein coding RNA 1781	0.662937	0.866895	-1.74472	0.650754	0.941196	-1.10881	0.219227	0.726107	-2.70819	0.900429	0.940684	0.637075	0.780967	0.891099	-0.815108	0.566733	0.781216	-1.91197
chr1	80137792	80137952	161	chr1:80137792-80137952	4	TGTTGGAGTACCCTGCCGTGTGAGGTGTCAGTGTGCCCCTGCTGGGGTGTGCCTCCCAGTTAGGCTGCTCGGGGGTCAGGGGTCAGGGACCCACTTGAGGAGGCAGTCTGCCCGTTCTCAGATCTCCAGCTGCGTGCTGGGAGAACCACTGCTCTCTTCAA	Distal Intergenic	1	80535755	80646788	111034	1	101927412	ENST00000418041.5	-397803	ENSG00000234184	LINC01781	long intergenic non-protein coding RNA 1781	0.662937	0.866895	-1.74472	0.650754	0.941196	-1.10881	0.219227	0.726107	-2.70819	0.900429	0.940684	0.637075	0.780967	0.891099	-0.815108	0.566733	0.781216	-1.91197
chr1	80137952	80138112	161	chr1:80137952-80138112	1	AAGCTGTCAGACAGGGACATTTAAGTCTGCAGAGGTTACTGCTGTCTTTTTGTTTGTCTGTGCCCTGCCCCCAGAGGTGGAGCCTACAGAGGCAGGCAGGCCTCCTTGAGCTGTGGTGGGCTCCACCCAGTTAGAGCTTTCCCGGCTGCTTTGTTTGCCTA	Distal Intergenic	1	80535755	80646788	111034	1	101927412	ENST00000418041.5	-397643	ENSG00000234184	LINC01781	long intergenic non-protein coding RNA 1781	0.662937	0.866895	-1.74472	0.650754	0.941196	-1.10881	0.219227	0.726107	-2.70819	0.900429	0.940684	0.637075	0.780967	0.891099	-0.815108	0.566733	0.781216	-1.91197
chr1	80944325	80944511	187	chr1:80944325-80944511	1	GAGTTTCCAGTTTTTCTGTTCTGTTTTTTCCCCATCTTTGTGGTTTTATCTACTTTTGGTCTTTGATGATGGTGATGTACAGATGGGTTTTCGGTGTAGATGTCCTTTCTGGTTGTTAGTTTTCCTTCTAACAGACAGGACCCTCAGATGCAGGTCTGTTGGAATACCCTGCTGTGTGAGGTGTCAG	Distal Intergenic	1	80641280	80646795	5516	1	101927412	ENST00000686004.1	303045	ENSG00000234184	LINC01781	long intergenic non-protein coding RNA 1781	0.800777	1	1.18435	0.708625	0.951591	1.54843	0.271654	0.726107	0.220877	0.594217	0.879899	0.548433	0.682605	0.838118	2.11396	0.258426	0.781216	2.41719
chr1	80944511	80944697	187	chr1:80944511-80944697	3	GTGTGCCCCTGCTGGGGGGTGCCTCCCAGTTAGGCTGCTCGGGGGTCAGGGGTCAGGGACCCACTTGAGGAGGCAGTCTGCCCGTTCTCAGTTCTCCAGCTGCGTGCTGGGAGAACCACTGCTCTCTTCAAAGCTGTCAGACAGGGACACTTAAGTCTGCAGAGGTTACTGCTGTCTTTTTGTTTGT	Distal Intergenic	1	80641280	80646795	5516	1	101927412	ENST00000686004.1	303231	ENSG00000234184	LINC01781	long intergenic non-protein coding RNA 1781	0.800777	1	1.18435	0.708625	0.951591	1.54843	0.271654	0.726107	0.220877	0.594217	0.879899	0.548433	0.682605	0.838118	2.11396	0.258426	0.781216	2.41719
chr1	81989285	81989436	152	chr1:81989285-81989436	2	TTTATTCTTGGTTTAATTTCTGTGACCCATACTTAAGAAATCTCTAACATTTCTGCGTTTGACCTCCATGGCCATGGTGTCTGTGGGCCTATCTTGTACAGTGGACTCTGCTGGTTCATTCGGTGCTGTCACTGTGACTGATGCAGACTGCA	Promoter (<=1kb)	1	81988392	81990709	2318	1	23266	ENST00000464551.1	893	ENSG00000117114	ADGRL2	adhesion G protein-coupled receptor L2	0.644036	0.849049	0.0681743	0.123414	0.704072	24.9842	0.267894	0.726107	-0.8953	0.176959	0.682531	24.4334	0.983438	1	0.997785	0.183554	0.781216	2.59739
chr1	82777500	82777798	299	chr1:82777500-82777798	8	TGACAAAGATGATGAGACAGCGATCAGCTAGATGACAAGAGACAGTGAGATGGCGATTGACTAGACAGCGAGAGATGGAAAGAGAGAGAGACAGCAATCGACTAGGCAGTGAGAGATGGTGGCTGCAACAGTAAGGAGCTGCTAACACTGCAGCGTTGTAACACTAGCCAAAGACTCTTTTAAGAGCCATCATGTTTCCTGAAAGGCGGTGGAGCTGAGCAGAAGGGTGAGCAGCAACAGCACGGCCTCATGTGAGATCCACTGCTCCAGCTGGTTGGTCACAAGACCGCATGCTGGTC	Intron (ENST00000653483.1/ENST00000653483.1, intron 1 of 4)	1	82903183	83166815	263633	1	103283057	ENST00000452901.5	-125385	ENSG00000230817	LINC01362	long intergenic non-protein coding RNA 1362	0.168696	0.603103	-2.53071	0.734206	0.951591	0.424743	0.0985004	0.726107	-0.883638	0.784418	0.906638	1.54584	0.350445	0.742895	-2.48218	0.460305	0.781216	-0.943768
chr1	83182610	83182777	168	chr1:83182610-83182777	1	TCCGCCATTGCCCAGGCTTGCTTAGGTAAACAAAGCAGCCAGGAAGCTCCAACTGGGTGGAGCCCACCACAGCTCAAGGAGGCCTGCCTGCCTCTGTAGGCTCCACCTCTGGGGGCAGGGCACAGACAAACAAAAAGACAGCAGTAACCTCTGCAGACTTAAATGTCA	Distal Intergenic	1	82973929	82986208	12280	2	101927498	ENST00000421931.1	-196402	ENSG00000236268	LINC01361	long intergenic non-protein coding RNA 1361	0.544211	0.803215	0.693163	0.0543496	0.704072	23.3805	0.693404	0.845217	-0.0218081	0.114587	0.682531	23.0097	0.479486	0.806744	1.25602	0.0567293	0.781216	2.01567
chr1	83355524	83355697	174	chr1:83355524-83355697	0	GAGTTTCCAGTTTTTCTGTTCTGTTTTTTCCCCATCTTTGTGGTTTTATCTACTTTTGGTCTTTGATGATGGTGATGTACAGATGGGTTTTTGGTGTGGATGTCCTTTCTGTTTGTTAGTTTTCCTTCTAACAGAGAGGACCCTCAGCTGCAGGTCTGTTGGAGTACCCTGCTG	Distal Intergenic	1	83445967	83462702	16736	1	101927542	ENST00000446227.3	-90270	NA	LINC01712	long intergenic non-protein coding RNA 1712	0.972134	1	2.72937	NA	NA	0	0.934592	0.999197	2.69856	0.176959	0.682531	22.9316	0.983438	1	0.906274	0.244564	0.781216	-22.7872
chr1	83355697	83355870	174	chr1:83355697-83355870	3	GTGTGAGGTGTCAGTGTGCCCCTGCTGGGGGGTGCCTCCCAGTTAGGCTGCTCGGGGATCAGGGATCAGGGACCCACTTGAGGAGGCAGTCTGCCCGTTCTGAGATCTCCAGCTGCGTGCTGGGAGAACCACTGCTCTCTTCAAAGCTGTCAGACAGGGACATTTAAGTCTGCA	Distal Intergenic	1	83445967	83462702	16736	1	101927542	ENST00000446227.3	-90097	NA	LINC01712	long intergenic non-protein coding RNA 1712	0.972134	1	2.72937	NA	NA	0	0.934592	0.999197	2.69856	0.176959	0.682531	22.9316	0.983438	1	0.906274	0.244564	0.781216	-22.7872
chr1	83651753	83651904	152	chr1:83651753-83651904	0	CCCAGTCTCAGGTATTTTGTTACAGGAGCACAAATAAACTAAGACAATGATATAATATTTACATAACTTAAAAAAATCATCATGACTTTCATGTGGAAAATAGACTGATAAGAGAGGGGAATGGAGGTAGAGCCTAAGCAGAGAGTACTGCA	Intron (ENST00000417975.1/101927587, intron 2 of 2)	1	83747054	83752515	5462	2	101927587	ENST00000662803.1	100611	ENSG00000233008	LINC01725	long intergenic non-protein coding RNA 1725	0.329114	0.603103	24.2549	0.456774	0.75726	-0.0340503	0.0927196	0.726107	24.2703	0.340068	0.720344	0.691195	0.567	0.806744	1.04248	0.611875	0.792271	-0.681721
chr1	85749106	85749282	177	chr1:85749106-85749282	3	GTAACCTCTGCAGACTTAAGTGTCCCTGTCTGACAGCTTTGAAGAGAGCAGTGGTTCTCCCAGCACGCAGCTGGAGATCTGAGAACGGGCAGACTGCCTCCTCAAGTGGGTCCCTGACCCCTGACCCCCGAGCAGCCTAACTGGGAGGCACCCCCCAGCAGGGGCACACTGACACCT	Intron (ENST00000370571.7/255631, intron 55 of 59)	1	85734789	85744749	9961	2	255631	ENST00000473734.1	-4357	ENSG00000171502	COL24A1	collagen type XXIV alpha 1 chain	0.348734	0.603103	-1.17568	0.289678	0.704072	1.03773	0.578217	0.845217	-1.08845	0.48544	0.867492	0.321153	0.291522	0.704731	-0.783871	0.217041	0.781216	1.45425
chr1	85749282	85749458	177	chr1:85749282-85749458	0	TCACACAGCAGGGTATTCCAACAGACCTGCAGCTGAGGGTCCTGTCTGTTAGAAGGAAAACTAACAACCAGAAAGGACATCTACACCAAAAACCCATCTGTACATCACCATCATCAAAGACCAAAAGTAGATAAAACCACAAAGATGGGGAAAAAACAGAACAGAAAAACTGGAAAC	Intron (ENST00000370571.7/255631, intron 55 of 59)	1	85734789	85744749	9961	2	255631	ENST00000473734.1	-4533	ENSG00000171502	COL24A1	collagen type XXIV alpha 1 chain	0.348734	0.603103	-1.17568	0.289678	0.704072	1.03773	0.578217	0.845217	-1.08845	0.48544	0.867492	0.321153	0.291522	0.704731	-0.783871	0.217041	0.781216	1.45425
chr1	85830009	85830182	174	chr1:85830009-85830182	3	GAGTTTCCAGTTTTTCTGCTCTGTTTTTTCCCCATCTTTGTGGTTTTATCTACTTTTGGTCTTTGATGATGGTGATGTACAGATGGGTTTTCGGTGTGGATGTCCTTTCTGTTTGTTAGTTTTCCTTCTAACAGACAGGACCCTCAGCTGCAGGTCTGTTGGAGTACCCGGCCG	Intron (ENST00000370571.7/255631, intron 43 of 59)	1	85734789	85744749	9961	2	255631	ENST00000473734.1	-85260	ENSG00000171502	COL24A1	collagen type XXIV alpha 1 chain	NA	NA	0	0.292615	0.704072	24.2291	0.203351	0.726107	23.9768	0.176959	0.682531	24.0143	0.22065	0.681513	-23.9403	0.917251	0.986213	1.61164
chr1	85830182	85830355	174	chr1:85830182-85830355	2	GTGTGAGGTGTCAGTCTGCCCCTGCTGGGGGGTGCCTCCCAGTTAGGCTGCTCGGGGGTCAGGGGTCAGGGACCCACTTGAGGAGGCAGTCTGCCCGTTCTCAGATCTCCAGTTGCATGCTGGGAGAACCACTGCTCTCTTCAAAGCTGTCAGACAGGGACATTTAAGTCTGCA	Intron (ENST00000370571.7/255631, intron 43 of 59)	1	85734789	85744749	9961	2	255631	ENST00000473734.1	-85433	ENSG00000171502	COL24A1	collagen type XXIV alpha 1 chain	NA	NA	0	0.292615	0.704072	24.2291	0.203351	0.726107	23.9768	0.176959	0.682531	24.0143	0.22065	0.681513	-23.9403	0.917251	0.986213	1.61164
chr1	86573636	86573778	143	chr1:86573636-86573778	1	CTGCAGATATAACCTGCAAACAAGTTAAAAATTAGTGTGAGATATAGACTGCTAGTGTTTGGAGAATAAGCTGAAGGATAATAAAGGTCATTTCTGAGGTTGCCATCATCGTTGACTGAGAACATGATGATTATAGTGAGAAG	Promoter (2-3kb)	1	86571116	86572956	1841	1	22802	ENST00000496322.1	2520	ENSG00000016602	CLCA4	chloride channel accessory 4	0.583211	0.813605	-0.598233	0.123414	0.704072	25.4264	1	1	-1.56171	0.176959	0.682531	24.4751	0.236697	0.690204	0.331378	0.170235	0.781216	6.00873
chr1	86684169	86684331	163	chr1:86684169-86684331	1	TTAGAGTTTCCAGTTTTTCTGTTCTGTTTTTTCCCCATCTTTGTGGTTTTATCTACTTTTGGTCTTTGATGATGGTGATGTACAGATGGGTTTTCGGTGTAGATGTCCTTTCTGGTTGTTAGTTTTCCTTCTAACAGACAGGACCCTCAGCTGCAGGTCTGTT	Exon (ENST00000699484.1/105378828, exon 6 of 6)	1	86571181	86693203	122023	2	105378828	ENST00000456587.1	8872	ENSG00000261737	CLCA4-AS1	CLCA4 antisense RNA 1	0.3233	0.603103	0.0677785	0.500398	0.783633	0.669259	0.371823	0.840723	-0.199904	0.628403	0.879899	0.0916204	0.399024	0.806744	0.302596	0.455861	0.781216	1.00514
chr1	86684331	86684493	163	chr1:86684331-86684493	3	TGGAATACCCTGCTGTGTGAGGTGTCAGTGTGCCCCTGCTGGGGGGTGCCTCCCAGTTAGGCTGCTCGGGGGTCAGGGGTCAGGGACCCACTTGAGGAGGCAGTCTGCCCGTTCTCAGATCTCCAGCTGCGTGCTGGGAGAACCACTGCTCTCTTCAAAGCTG	Exon (ENST00000699484.1/105378828, exon 6 of 6)	1	86571181	86693203	122023	2	105378828	ENST00000456587.1	8710	ENSG00000261737	CLCA4-AS1	CLCA4 antisense RNA 1	0.3233	0.603103	0.0677785	0.500398	0.783633	0.669259	0.371823	0.840723	-0.199904	0.628403	0.879899	0.0916204	0.399024	0.806744	0.302596	0.455861	0.781216	1.00514
chr1	86684493	86684655	163	chr1:86684493-86684655	2	GTCAGACAGGGACACTTAAGTCTGCAGAGGTTACTGCTGCCTTTTTGTTTGTCTGTGCCCTGCCCCCAGAGGTGGAGCCTACAGAGGCAGGCAGGCCTCCTTGAGCTGTGGTGGGCTCCACCCAGTTCGAGCTTCCCGGCTGCTTTGTTTACCTAAGCAAGCC	Exon (ENST00000699484.1/105378828, exon 6 of 6)	1	86571181	86693203	122023	2	105378828	ENST00000456587.1	8548	ENSG00000261737	CLCA4-AS1	CLCA4 antisense RNA 1	0.3233	0.603103	0.0677785	0.500398	0.783633	0.669259	0.371823	0.840723	-0.199904	0.628403	0.879899	0.0916204	0.399024	0.806744	0.302596	0.455861	0.781216	1.00514
chr1	88684476	88684686	211	chr1:88684476-88684686	19	TTTTTCTTTCTCTCCCCTCTCCTCACCCCCACCCCGAGCCCCGTCCCGCCTTCTCCCTTCGCCAGAGGCGGCCGCGTCCAGGTGCGGAGTCCATACCGGAGCGCAATGGCGTCCAACCCCGAACGGGGGGAGATTCTGCTCACGGAACTGCAGGTAAGGGCCGCGGCCCTGGTGAGAGGCGCTGGCGGAGGAGACAGGGAGAGAGCCCCGC	Promoter (<=1kb)	1	88684573	88833519	148947	1	5586	ENST00000370513.9	0	ENSG00000065243	PKN2	protein kinase N2	NA	NA	0	0.389207	0.704072	-24.272	0.484642	0.84435	23.5102	0.210736	0.682531	-24.272	0.501742	0.806744	-23.4736	0.523999	0.781216	-23.4032
chr1	89272735	89272877	143	chr1:89272735-89272877	0	CTGCAGACATTCCCAGTGAGTGTTACAGCTCATAAAGGCAGTGTGGACCCAAAGAGTGAGCAGCAGCAAGATTTATTGCAAAGAGTGAAAGAACAAAGGTTCCACAGCCTGGAGGGTGACCTCAGTGGGTTGCCACTGCTGGC	Promoter (<=1kb)	1	89256189	89272860	16672	2	115362	ENST00000370459.8	0	ENSG00000154451	GBP5	guanylate binding protein 5	0.152084	0.603103	23.2124	0.205257	0.704072	-23.0107	0.306975	0.726107	22.2489	0.070489	0.576841	-23.0107	0.0464076	0.476039	23.2124	0.350384	0.781216	-22.142
chr1	89272889	89272990	102	chr1:89272889-89272990	1	TCTGGCCCCACCCACATCCTGCTGATGGGTCCATTTTACAGAGAGCCGATTGGTCCATTTTACAGAGAGCTGATTGGTCTGTTTTGACAGGGTGCTGATTGG	Promoter (<=1kb)	1	89256189	89272860	16672	2	115362	ENST00000370459.8	-29	ENSG00000154451	GBP5	guanylate binding protein 5	0.152084	0.603103	23.2124	0.205257	0.704072	-23.0107	0.306975	0.726107	22.2489	0.070489	0.576841	-23.0107	0.0464076	0.476039	23.2124	0.350384	0.781216	-22.142
chr1	89273062	89273120	59	chr1:89273062-89273120	0	GGATTGGCCTATTTACAAACCTTGAGCTAGATACAGAGTGCTGATTGGTGCATTTACAA	Promoter (<=1kb)	1	89256189	89272860	16672	2	115362	ENST00000370459.8	-202	ENSG00000154451	GBP5	guanylate binding protein 5	0.152084	0.603103	23.2124	0.205257	0.704072	-23.0107	0.306975	0.726107	22.2489	0.070489	0.576841	-23.0107	0.0464076	0.476039	23.2124	0.350384	0.781216	-22.142
chr1	89752115	89752289	175	chr1:89752115-89752289	2	GAGTTTCCAGTTTTTCTGTTCTGTTTTTTCCCCATCTTTGTGGTTTTATCTACTTTTGGTCTTTGATGATGGTGATGTACAGATGGGTTTTCGGTGTGGATGTCCTTTCTGTTTGTTATTTTTCCTTCTAACAGACAGGACCCTCAGCTGCAGGTCTGTTGGAATACCCTGCCGT	Intron (ENST00000479252.1/84230, intron 2 of 3)	1	89788914	89790492	1579	1	101927975	ENST00000432395.1	-36625	NA	LOC101927975	uncharacterized LOC101927975	0.862068	1	0.210317	0.877414	0.951591	-0.365946	0.784902	0.920979	0.193217	0.568194	0.879899	-0.438921	0.574441	0.806744	0.124544	0.985338	0.989603	-0.155083
chr1	89752289	89752463	175	chr1:89752289-89752463	3	TGTGAGGTGTCAGTGTGCCCCTGCTGGGGGGTGCCTCCCAGTTAGGCTGCTCGGGGGTCAGGGGTCAGGGACCCACTTGAGGAGGCAGTCTGCCCGTTCTCAGATCTCCAGCTGCGTGCTGGGAGAACCACTGCTCTCTTCAAAGCTGTCAGACAGGGACATTTAAGTCTGCAGA	Intron (ENST00000479252.1/84230, intron 2 of 3)	1	89788914	89790492	1579	1	101927975	ENST00000432395.1	-36451	NA	LOC101927975	uncharacterized LOC101927975	0.862068	1	0.128274	0.877414	0.951591	-0.338365	0.784902	0.920979	0.148499	0.568194	0.879899	-0.451626	0.574441	0.806744	0.0452815	0.985338	0.989603	-0.10626
chr1	89984470	89984631	162	chr1:89984470-89984631	0	GGGTGCTGATTGGTGTGTTTACAAACCTTGAGCTAGATACAGAGTGCTGATTGGTGTATTTACAATCCCTTAGCTAGACATAAAGGTTCTCCAAGTCCCCACCAGAGTCAGGAGCCTAGCTGGCTTCACCCAGTGGATCCTGCAGTGGGGGGCTGCAGGTGG	Distal Intergenic	1	89993593	89994321	729	2	492303	ENST00000380526.2	9690	NA	GEMIN8P4	gem nuclear organelle associated protein 8 pseudogene 4	0.353872	0.603103	-24.6842	0.205257	0.704072	-24.6415	1	1	-3.05587	0.301844	0.682531	-3.45666	0.22065	0.681513	-24.0454	0.244564	0.781216	-23.975
chr1	89984631	89984792	162	chr1:89984631-89984792	11	GAGCTGCCTGCCCGTCCCGCAACGTGCGCCCGCACTCCTCAGCCCTTGGGTGGTTGATGGGACTGGGTGCCATAGAGCAGGGGGCTGCGCTCCTCGGGGAGGCTCGGTCCGCACAGGAGCCCACGGAGCTTGGGGAGGCTCAGGCATGGCGGGCTGCAGGTC	Distal Intergenic	1	89993593	89994321	729	2	492303	ENST00000380526.2	9529	NA	GEMIN8P4	gem nuclear organelle associated protein 8 pseudogene 4	0.353872	0.603103	-25.2692	0.205257	0.704072	-25.1976	1	1	-3.64084	0.301844	0.682531	-4.0127	0.22065	0.681513	-24.5398	0.244564	0.781216	-24.4694
chr1	90840491	90840642	152	chr1:90840491-90840642	4	ATATACAGATGCCAGGGCCGGCATGGCCAGGATGAGTGCGCCAGATTTACACAGTAAAGCCTTCACACGCGGGCTGTCAGTTTTGATTGATCTCTACTATACCTCAGGAACTTGTTGACTAGGTAGGGAAACAGTGCAAATAATTCACTGCA	Promoter (<=1kb)	1	90841587	90849472	7886	1	105378855	ENST00000650406.1	-945	NA	LINC02788	long intergenic non-protein coding RNA 2788	0.353872	0.603103	-22.8181	0.945411	0.951591	-0.158252	0.65379	0.845217	-1.32697	0.717538	0.879899	-1.15825	0.325495	0.704731	-22.6878	0.596098	0.781216	0.710503
chr1	92591980	92592122	143	chr1:92591980-92592122	6	ACGCTTGTAATCCCAGCACTTTGGGAGGCCAAGGCGGGCGGTTCACAAGGTCAGGAGATTGAGACCATCCTGGCTAACATGGTGAAACCCCGTCTCTACTAAAAATACAAAAAATTAGCCGGGCGTGGTAGCAGGTGCCTGCA	Intron (ENST00000684568.2/7813, intron 18 of 19)	1	92607449	92625934	18486	2	7813	ENST00000492513.5	33812	ENSG00000067208	EVI5	ecotropic viral integration site 5	0.33986	0.603103	-2.52556	0.0628259	0.704072	-26.6355	0.253854	0.726107	-1.94192	0.439121	0.828721	-0.770565	0.515537	0.806744	-1.99425	0.0450382	0.781216	-26.7439
chr1	93795742	93795916	175	chr1:93795742-93795916	2	GAGTTTCCAGTTTTTCTGTTCTGTTTTTTCCCCATCTTTGTGGTTTTATCTACTTTTGGTCTTTGATGATGGTGATGTACAGATGGGTTTTCGGTGTAGATGTCCTTTCTGGTTGTTAGTTTTCCTTCTAACAGACAGGACCCTCAGCTGCAGGTCTGTTGGAATACCCTGCCGT	Intron (ENST00000370244.5/8412, intron 2 of 13)	1	93752924	93775444	22521	2	8412	ENST00000433544.1	-20298	ENSG00000137936	BCAR3	BCAR3 adaptor protein, NSP family member	0.623766	0.842697	0.485815	0.449394	0.75726	-0.323275	0.918883	0.999197	0.301151	0.381303	0.793249	-0.480447	0.519563	0.806744	0.448594	0.589564	0.781216	-0.0623374
chr1	93795916	93796090	175	chr1:93795916-93796090	3	TGTGAGGTGTCAGTGTGCCCCTGCTGGGGGGTGCCTCCCAGTTAGGCTGCTCGGGGGTCAGGGGTCAGGGACCCACTTGAGGAGGCAGTCTGCCCGTTCTCAGATCTCCAGCTGCGTGCTGGGAGAACCACTGCTCTCTTCAAAGCTGTCAGACAGGGACACTTAAGTCTGCAGA	Intron (ENST00000370244.5/8412, intron 2 of 13)	1	93752924	93775444	22521	2	8412	ENST00000433544.1	-20472	ENSG00000137936	BCAR3	BCAR3 adaptor protein, NSP family member	0.623766	0.842697	0.485815	0.449394	0.75726	-0.323275	0.918883	0.999197	0.301151	0.381303	0.793249	-0.480447	0.519563	0.806744	0.448594	0.589564	0.781216	-0.0623374
chr1	93801645	93801796	152	chr1:93801645-93801796	2	CTGCAGCTGTTTGTTTATGAAGACAGTTTCTCAGGCTGGGTGTGGTGGCTCACGCCTATAATCCCAGCGACTTGGGAGGCCAATGCAGGAGAATCATTTGAGGCCAAGAGTTAGAGACCAGTAGTAACATAGTAAGGCATATATAGTAAGGC	Intron (ENST00000370244.5/8412, intron 2 of 13)	1	93752924	93775444	22521	2	8412	ENST00000433544.1	-26201	ENSG00000137936	BCAR3	BCAR3 adaptor protein, NSP family member	0.865302	1	1.15133	0.751328	0.951591	-1.80037	0.867858	0.992575	0.607061	0.58457	0.879899	-1.68545	0.884002	0.987072	1.30416	0.991049	0.994263	-1.28381
chr1	94070066	94070225	160	chr1:94070066-94070225	0	AAAGTTTCTTGTTGAATCATCCCAACAACTTGGGCACATGGATGCTACTATATTCAAAACATCTGCTAATCAACAGAGCTGGGCACTGACCAATCAGACCACATTCTGGCCACAAACACCCATTTCAGCCACACCAGTGAATGCCACTTGAACTGCAGTT	Intron (ENST00000370225.4/24, intron 11 of 49)	1	94059469	94061439	1971	2	24	ENST00000472033.1	-8627	ENSG00000198691	ABCA4	ATP binding cassette subfamily A member 4	0.972134	1	3.02092	0.205257	0.704072	-23.3619	0.690137	0.845217	2.05745	0.070489	0.576841	-23.3619	0.614107	0.806744	3.95053	0.350384	0.781216	-22.4931
chr1	94070225	94070384	160	chr1:94070225-94070384	1	TTGGGTTATCATCCTCAGTTTTCTGGCAGTAAAACAGCAAAGTTGCCTCCAATCACAGAGCCTATTGGTGCAAGAGATGGTGTCCTTTCACCTATAGGTGAAGCTTTTGCAAGCCGTGCCTGCTGACTCCAGGCACTACTTCTTCTCCCCTGATGCTGCA	Intron (ENST00000370225.4/24, intron 11 of 49)	1	94059469	94061439	1971	2	24	ENST00000472033.1	-8786	ENSG00000198691	ABCA4	ATP binding cassette subfamily A member 4	0.972134	1	3.19085	0.205257	0.704072	-23.5133	0.690137	0.845217	2.22737	0.070489	0.576841	-23.5133	0.614107	0.806744	4.12046	0.350384	0.781216	-22.6446
chr1	94152540	94152682	143	chr1:94152540-94152682	4	CTGCAGCCGGCCCTGAGCACCAGGGCCCACCAGAGTCACTTTTCGGTCGTTGTCTCGCCTGACCTTCTTCCACACCTGGGACTGCTGGCCTCTCTTCCCTGGGTTCCAAGGCTATTTTGATTTGCTTTCCCAGGTCCTCCATA	Promoter (2-3kb)	1	94148988	94154829	5842	2	105378858	ENST00000546444.1	2147	NA	LOC105378858	uncharacterized LOC105378858	0.152084	0.603103	24.8826	0.692012	0.951591	-0.69641	0.0927196	0.726107	25.1614	0.925237	0.94116	-0.00166822	0.731233	0.864372	0.550323	0.566733	0.781216	-0.92559
chr1	94450247	94450396	150	chr1:94450247-94450396	1	TCACTGTGACAAAGCCGCCTTTGCTTTTATTACTTTGCAAAACAAATAAGGGGGACATGTTGGGAACAGGCCCCCCAAATCTGGCCATAAACTGGCCCCAAAACTGGCCATAAACAAAATCTCTGCAGTACTGTGACATGTTCCTGATGG	Intron (ENST00000370214.9/5825, intron 1 of 22)	1	94480222	94487791	7570	1	5825	ENST00000493416.5	-29826	ENSG00000117528	ABCD3	ATP binding cassette subfamily D member 3	0.353872	0.603103	-21.8181	0.389207	0.704072	-21.6869	0.690137	0.845217	1.69772	0.753887	0.879899	1.86644	0.325495	0.704731	-23.7009	0.350384	0.781216	-23.6305
chr1	94450396	94450545	150	chr1:94450396-94450545	4	GCCATGATGCCCATGCTGAAGGTTGTGGGTTTACCGGAATGAGGGCAAGGAACACCTGGCCCACCCAGGGCGGAAAACCGCTTAAGGCTTTCTTAAACCACAAACAATAGCATGAGCGATCTGTGCCTTAAGGACATGTTCCTGCTGCAG	Intron (ENST00000370214.9/5825, intron 1 of 22)	1	94480222	94487791	7570	1	5825	ENST00000493416.5	-29677	ENSG00000117528	ABCD3	ATP binding cassette subfamily D member 3	0.353872	0.603103	-21.8181	0.389207	0.704072	-21.6869	0.690137	0.845217	1.69772	0.753887	0.879899	1.86644	0.325495	0.704731	-23.7009	0.350384	0.781216	-23.6305
chr1	94730160	94730328	169	chr1:94730160-94730328	4	CTGCAGCCTTTTGGGGGGTTTATGAGTGTATTGTAGAAGCTTTTTTTTTTTTTTTTTTTGAGACAGAGCTCTGCCTCCCGGGTTCATGCCATTCTCCTGCCTCAGCCTCCCGAGTAGCTGGGACTACAGGCGCCCACCACCACGCCCAGCTAATTTTTTGTATTTTTAG	Intron (ENST00000634870.1/101928079, intron 2 of 5)	1	94732133	94742495	10363	2	101928079	ENST00000424711.1	12167	ENSG00000224081	SLC44A3-AS1	SLC44A3 antisense RNA 1	0.55088	0.809528	1.74716	0.784959	0.951591	1.69382	0.869945	0.993362	1.32894	0.784418	0.906638	1.34202	0.350445	0.742895	1.37322	0.844698	0.959579	1.23152
chr1	95297372	95297527	156	chr1:95297372-95297527	1	ACTTTTGGTCTTTGATGATGGTGATGTACAGATGGGTTTTTGGTGTGGATGTCCTTTCTGTTTGTTAGTTTTCCTTCTAACAGACAGGACCCTCAGCTGCAGGTCTGTTGGAATACCCTGCTGTGTGAGGTGTCCGTGTGCCCCTGCTGGGGGGTG	Distal Intergenic	1	95310928	95318263	7336	2	100996630	ENST00000423410.1	20736	ENSG00000228504	LINC01760	long intergenic non-protein coding RNA 1760	0.972134	1	3.38865	0.734206	0.951591	0.565249	0.934592	0.999197	3.65467	0.320819	0.687733	-0.434751	1	1	0.46882	0.917251	0.986213	1.434
chr1	95297527	95297682	156	chr1:95297527-95297682	1	GCCTCCCAGTTAGGCTGCTCGGGGGTCAGGGGTCAGGGACCCACTTGAGGAGGCAGTCTGCCCATTCTCAGATCTCCAGCTGTGTGCTGGGAGAATCACTGCTCTCTTCAAAGCTGTCAGACAGGGACATTTAAGTCTGCAGAGGTTACTGCTGTC	Distal Intergenic	1	95310928	95318263	7336	2	100996630	ENST00000423410.1	20581	ENSG00000228504	LINC01760	long intergenic non-protein coding RNA 1760	0.972134	1	3.38865	0.734206	0.951591	0.565249	0.934592	0.999197	3.65467	0.320819	0.687733	-0.434751	1	1	0.46882	0.917251	0.986213	1.434
chr1	95376317	95376468	152	chr1:95376317-95376468	1	CTGCAGAGATTCCTATTAGACATCTAAGTGAAGATGTCACGCAGGGAGTTGGATATATATGGAGTTTATGGGAGAAGTCAGGGGATGGTGATAGAAATTTGGGACCATCAGCACACAGATGGTATGGAAAGCAATGGAAGAGATAAGATGAC	Intron (ENST00000426881.6/ENST00000426881.6, intron 1 of 2)	1	95351251	95352676	1426	2	101928169	ENST00000664351.1	-23641	NA	LINC01650	long intergenic non-protein coding RNA 1650	0.173089	0.603103	-24.1552	0.205257	0.704072	-24.0239	0.0550356	0.726107	-24.1552	0.070489	0.576841	-24.0239	0.325495	0.704731	-23.2256	0.350384	0.781216	-23.1552
chr1	95669444	95669596	153	chr1:95669444-95669596	2	TGATTGGTGTGTTTACAAACCCTGAGCTAGAGACAGAGTGCCGATTGGTGGATTCACAATCCCTGAGCTAGACATAAAGGTTCTCCAAGGCCCCACCAGACTCAGCAGCCCAGCTGGCTTCACCCAGTGGATCCCACACCGGTGCTGCAGGTG	Intron (ENST00000456933.1/101928219, intron 2 of 3)	1	95625485	95777693	152209	1	101928219	ENST00000665349.1	43959	NA	LOC101928219	uncharacterized LOC101928219	1	1	-2.21859	0.461936	0.75726	1.21814	0.967269	0.999197	0.0494198	0.889459	0.940684	0.218139	0.983438	1	-2.73112	0.183554	0.781216	2.08689
chr1	95669596	95669748	153	chr1:95669596-95669748	9	GGAGCTGCCTGCCAGTCCCACGCCGTGCGCCTGCACTCCTCAGCCCTTGGGTGGTCGATGGGACTGGCTGCCGTGGAGCAGGGGGTGGCACTCGTGGAGGAGGCTCGGGCTACCCAGGAGCCCACGGAGGGGGTGGGAGGCTCAGGCTTGGCG	Intron (ENST00000456933.1/101928219, intron 2 of 3)	1	95625485	95777693	152209	1	101928219	ENST00000665349.1	44111	NA	LOC101928219	uncharacterized LOC101928219	1	1	-2.21859	0.461936	0.75726	1.21814	0.967269	0.999197	0.0494198	0.889459	0.940684	0.218139	0.983438	1	-2.73112	0.183554	0.781216	2.08689
chr1	95669748	95669900	153	chr1:95669748-95669900	11	GGGCTGCAGGTCCCGAGCCCTGCCCCACGGGAAGGCAGCTAAGGCCTGGCGAGAAATCGAGTGCAGCGCTGGCGGGCTGGCACTGCTGGGGGACCCAGTACATCCTCCGCAGCCGCTGGCCCGGGTGCTAAGCCCCTCATTGCCGGAGCCGGC	Intron (ENST00000456933.1/101928219, intron 2 of 3)	1	95625485	95777693	152209	1	101928219	ENST00000665349.1	44263	NA	LOC101928219	uncharacterized LOC101928219	1	1	-2.21859	0.461936	0.75726	0.985503	0.967269	0.999197	-0.183216	0.889459	0.940684	-0.0144971	0.983438	1	-2.57055	0.183554	0.781216	1.85426
chr1	95945157	95945299	143	chr1:95945157-95945299	4	CACCGCGCCCGGCCCAGTCTAGTGATTTCTAAACCCAACTTAAACATTCAAATAGCCCAGGAGCTTCAGATTGAGTACATCTGGATTAGGGTCTAGGAATCTGTTGTTTTAAACGTGTTTGAAGATTAATCTGATAAACTGCA	Intron (ENST00000442558.5/102723661, intron 1 of 1)	1	95937901	96022866	84966	1	102723661	ENST00000442558.5	7256	ENSG00000237435	LINC02790	long intergenic non-protein coding RNA 2790	0.173089	0.603103	-25.604	0.389207	0.704072	-24.6674	0.0550356	0.726107	-25.604	0.717538	0.879899	-1.1439	0.325495	0.704731	-24.6744	0.350384	0.781216	-24.604
chr1	96482435	96482597	163	chr1:96482435-96482597	1	AAGGCTTTCCAGTCTCCATTCTAGGACTTAGCCTTATAACACATATTACAAGTAAAGTTCCCACTTGCCTCCAGCAGAAAAGTCACATCATGTATCACATCTTCTTGGTAAGACTGCCTTCCTTTGCTTTCGTTTTATCTTGAACTGCTATGCTTTTCCTGCA	Distal Intergenic	1	96254069	96374125	120057	2	101928241	ENST00000435311.1	-108310	ENSG00000231987	LINC01787	long intergenic non-protein coding RNA 1787	0.329114	0.603103	22.8108	0.389207	0.704072	-22.6092	0.484642	0.84435	21.8473	0.210736	0.682531	-22.6092	0.167938	0.681513	22.8108	0.523999	0.781216	-21.7404
chr1	98578302	98578512	211	chr1:98578302-98578512	2	CCTGCAGAAAAATTTTTAATTTTTGACTGTTCTTTGCTAGTATATGAATCACAAGTAATTTTTATTTTATTTATTTATTTTTTTTTTGAGACAGAGTCTTGCTCTGTCACCCAGGCTGGAGTGCAGTGGCACGATCTCGGCTCACTGCAACCTCCACCTCCTGGGTTCAAGTGATTCTTCTGCCTCAGCCTCCTGAGCAGCTGGGACTGCA	Distal Intergenic	1	98661701	98760498	98798	1	51375	ENST00000529992.5	-83189	ENSG00000162627	SNX7	sorting nexin 7	NA	NA	0	NA	NA	0	NA	NA	0	NA	NA	0	NA	NA	0	NA	NA	0
chr1	99404402	99404544	143	chr1:99404402-99404544	2	CTGCAGAGTGTTTTCCAACTTGGTTCCATTCTCCCTGTCACTTTCAGGTACACCAATCAGACGTAGATTTGGTCTTTTCACATAGTCCCATATTTCTTGGAGGCTTTGTTCGTTTCTTTTTATTCTTTTTTCTCTAAACTTCC	Distal Intergenic	1	99472332	99493149	20818	2	101928270	ENST00000634316.1	88605	ENSG00000224445	LINC01708	long intergenic non-protein coding RNA 1708	0.348734	0.603103	-1.94493	0.113079	0.704072	-23.2246	0.0920896	0.726107	-2.9084	0.106834	0.682531	-3.60807	0.744146	0.869065	-1.01531	0.173516	0.781216	-22.5392
chr1	100603491	100603668	178	chr1:100603491-100603668	1	AGGTCTGTTGGAGTTTGCTGGAGGTCCACTGCAGACCCTTTTCCCTGGGTATCACCAGCGGAGGCTGCAGAACAGCAAATATTGCAGAACAACAAATATTGCAGAACATCAAATGTTGCTGCCTGATCCTTCCTCTGGAAGCTTTGTTTCAGAGGGGCACCTGGCTGTATGAGGTGTC	Distal Intergenic	1	100627049	100640613	13565	2	100128787	ENST00000416343.2	36945	NA	LINC01349	long intergenic non-protein coding RNA 1349	0.152084	0.603103	24.8248	0.389207	0.704072	-24.4805	0.306975	0.726107	23.8613	0.717538	0.879899	-3.99089	0.0464076	0.476039	24.8248	0.350384	0.781216	-23.7544
chr1	100603668	100603845	178	chr1:100603668-100603845	1	CAGTCAGCCCCTACTGGGAGGTGTCTCCCAGTTAGGCTACTCTGGTGTCAGGGACCCACTTGAGTAGGCAGTCTGTCTGTTCTCAGATCTCGAACTTCATGCTGGGAGGACCACTACTCTCTTCAAAGCTGTCAGACAGGGACATTTAAGTCTGCAGAAGTTTCTGCTGCCTTTTATT	Distal Intergenic	1	100627049	100640613	13565	2	100128787	ENST00000416343.2	36768	NA	LINC01349	long intergenic non-protein coding RNA 1349	0.152084	0.603103	24.8248	0.389207	0.704072	-24.4805	0.306975	0.726107	23.8613	0.717538	0.879899	-3.99089	0.0464076	0.476039	24.8248	0.350384	0.781216	-23.7544
chr1	100681472	100681662	191	chr1:100681472-100681662	2	CTGCCTTGCTAGACTGGGGAAGTTCTCCTGGATAATATCCTGCAGAGTGTTTTCCAACTTGGTTCCATTCTCCCCGTCACTTTCAGGTACACCAATCAGACGTAGATTTGATCTTTTCACATAGTCCCATATTTCTTGGAGGCTTTGTTCATTTCTTTGTATTCTTTTTTCTCTAAACTTCCCTTCTCACT	Distal Intergenic	1	100719742	100738613	18872	1	7412	ENST00000370119.8	-38080	ENSG00000162692	VCAM1	vascular cell adhesion molecule 1	0.563548	0.812142	-2.03073	0.292615	0.704072	21.2624	0.484628	0.84435	-2.28774	0.114587	0.682531	22.8285	0.716881	0.855845	-1.29931	0.785469	0.928082	-1.15492
chr1	101979652	101979895	244	chr1:101979652-101979895	3	TGCTGCAGGAGTGGAACCCTCATGGAAAACCTCTGCTAGGGCGGTACAGAAGGGAAATGTGGGGTTGCAGCCCGACACAGAGTCTCTACTGGGGCACTACCTTGTGGAGCTGTGAGAAGAGGGCCACCATCCTCCAGCCCCCAGAATGGTAGATCCCCCAACGGCTTGTACTGTGCACCTGGAAAAGCTGCAGGCACTCAATGCCAGCCCATGAAAGCAGCTGGGAGTGAGGCTGTACCCTGCA	Intron (ENST00000370103.9/118427, intron 1 of 5)	1	101803486	101996905	193420	2	118427	ENST00000462354.5	17010	ENSG00000118733	OLFM3	olfactomedin 3	0.353872	0.603103	-24.6255	0.389207	0.704072	-24.4942	0.184235	0.726107	-24.6255	0.210736	0.682531	-24.4942	0.501742	0.806744	-23.6959	0.523999	0.781216	-23.6255
chr1	104775338	104775514	177	chr1:104775338-104775514	1	GAGTTTCCAGTTTTTCTGTTCTGTTTTTTCCCCATCTTTGTGGTTTTATCTACTTTTTGTCTTTGATGATGGTGATGTACAGATGGGTTTTCGGTGTAGATGTCCTTTCTGGTTGTTAGTTTTCCTTCTAACAGACAGGACCCTCAGCTGCAGGTCTGTTGGAATACCCTGCTGTGT	Distal Intergenic	1	104998406	105032365	33960	2	105378880	ENST00000648518.1	256851	NA	LOC105378880	uncharacterized LOC105378880	0.348734	0.603103	-1.17566	0.835531	0.951591	0.392772	0.387975	0.84435	-1.33698	0.736799	0.879899	-0.408237	0.399024	0.806744	-0.639515	0.490571	0.781216	1.0469
chr1	104775514	104775690	177	chr1:104775514-104775690	3	TGAGGTGTCAGTGTGCCCCTGCTGGGGGGTGCCTCCCAGTTAGGCTGCTCGGGGGTCAGGGGTCAGGGACCCACTTGAGGAGGCAGTCTGCCCGTTCTCAGATCTCCAGCTGCGTGCTGGGAGAACCACTGCTCTCTTCAAAGCTGTCAGACAGGGACACTTAAGTCTGCAGAGGTT	Distal Intergenic	1	104998406	105032365	33960	2	105378880	ENST00000648518.1	256675	NA	LOC105378880	uncharacterized LOC105378880	0.662937	0.866895	-0.788413	0.937945	0.951591	0.216693	0.578217	0.845217	-1.10239	0.454272	0.828721	-0.584317	0.767734	0.884174	-0.252267	0.661368	0.835374	0.893918
chr1	107234137	107234198	62	chr1:107234137-107234198	0	ATTTGAGATGGAGTCTCACTCTGTTGCCCAGGCTGCAGAGCAGTGGCATGATCTTGGCTCAC	Intron (ENST00000370073.6/22854, intron 2 of 7)	1	107260803	107334023	73221	1	22854	ENST00000477948.1	-26605	ENSG00000162631	NTNG1	netrin G1	0.440815	0.724807	0.131614	0.0381829	0.704072	-1.10151	0.424152	0.84435	-0.0788934	0.0546027	0.576841	-0.954829	0.676601	0.83452	0.283049	0.0630699	0.781216	-0.785995
chr1	107701431	107701712	282	chr1:107701431-107701712	1	GGCCCTTGATCCAGTCCACAAAACCATTTCTCTCCTAGGACTCTAGGACCATGATGGAAGGGGCTGCCATGAAGACCTCTGACATGCCCTGGAGACATTTTCCCCATTGTCTTGGCAATTAACATTTAGCTCCTCATTACTTATGCAAACTTCTGCAGCAAGCTTGAAATTCTCCCCAGAAAATGGGTTTTTCTTTTCTATCGCATCATCAGGCTGCAAATTCTCCAACCTTTTATGCTCCACTTCTCTTTTAAACATAAGTTCCAATTTCAAATCATCTCT	Intron (ENST00000370056.9/10451, intron 17 of 26)	1	107609814	107688528	78715	2	10451	ENST00000479977.6	-12903	ENSG00000134215	VAV3	vav guanine nucleotide exchange factor 3	0.644036	0.849049	0.0392425	0.891077	0.951591	0.481261	0.267894	0.726107	-0.924232	0.889459	0.940684	-0.311267	0.983438	1	0.968853	0.917251	0.986213	1.11324
chr1	108698255	108698406	152	chr1:108698255-108698406	2	GATGTGTGCAAATATGTCCACAGAAATAAATACATAGTAGGTATGTGGAATGTAAATTTAAGTCAATCGTTCCGCATAGTTTAGAAATGTAAGGGGCTTTTTCATATTGTTAACTGAGTGAGATCAGTTCCCTTTATGCCTGTGAGGCTGCA	Promoter (<=1kb)	1	108697700	108699385	1686	1	55119	ENST00000485810.1	555	ENSG00000134186	PRPF38B	pre-mRNA processing factor 38B	0.429682	0.709845	-0.0544815	0.53724	0.830263	0.577465	0.137928	0.726107	-0.701197	0.939971	0.953743	-0.0424647	0.935765	1	0.582146	0.291844	0.781216	0.990418
chr1	109018645	109018816	172	chr1:109018645-109018816	1	GCTCTACAAAAAATACAAAAATTAGCCAGGCATGGTTGTGCATGCCTGTGGTCCCAGCTACTCGGGAGGCTGAGGTGGGAGGATCACTTGAGCCCAGATGTCAAGGCTGCAGTGAGCTGAGATTGTGCCACTGCACTCCAGCCTGGGCAACAGAGTGAGACCCTGTCTCAAA	Intron (ENST00000400794.7/22911, intron 2 of 14)	1	109011527	109041547	30021	2	22911	ENST00000530772.5	22731	ENSG00000085433	WDR47	WD repeat domain 47	1	1	-0.351191	0.891077	0.951591	0.697215	0.65379	0.845217	-1.31467	0.753887	0.879899	-0.302785	0.649975	0.806744	0.578419	0.561579	0.781216	1.56597
chr1	109018816	109018987	172	chr1:109018816-109018987	1	AAAAACACACACAAAAAAGAAAGAACAGGTGATCATTTGAGCCCAGCAGTTCAAGACTAGCCTGGGCAACATGCAAAACCCCATCTCTACAAAAAATTTAAAAATTAGCTGGGCATGGTGGTACATGCCTGTAGTCCCAGCTATTCAGAAGGCTGAGGTGGGATAATCGCTT	Intron (ENST00000400794.7/22911, intron 2 of 14)	1	109011527	109041547	30021	2	22911	ENST00000530772.5	22560	ENSG00000085433	WDR47	WD repeat domain 47	1	1	-0.181266	0.891077	0.951591	0.52729	0.65379	0.845217	-1.14474	0.753887	0.879899	-0.47271	0.649975	0.806744	0.748344	0.561579	0.781216	1.39605
chr1	109018987	109019158	172	chr1:109018987-109019158	1	TGAGTCAAGAAGGTCATGGCTGCAGTGACCATGATCATGCCACTCCACTCCAGCCTGGCAGCCTAGGTGACATAGCAAGACCCTGTTTCAAAAAAAAAGTAAAAAGAATTTTAAAAGCTGGGAGTGGGCCAGGCATGGTGGCTGTCAGCATTTTTGGAGGCCGAGGCAGACA	Intron (ENST00000400794.7/22911, intron 2 of 14)	1	109011527	109041547	30021	2	22911	ENST00000530772.5	22389	ENSG00000085433	WDR47	WD repeat domain 47	1	1	-0.181266	0.891077	0.951591	0.52729	0.65379	0.845217	-1.14474	0.753887	0.879899	-0.47271	0.649975	0.806744	0.748344	0.561579	0.781216	1.39605
chr1	110656863	110657005	143	chr1:110656863-110657005	0	CTGCAGACTGATTTTTCTACTTTTTTGATCCCATTATAGATCAGTGAAAATTCTAAGGAGAAAGAATCCTATTTCCTTTCATCACAATCAATTTGAAGAATGATATATTTATGATACTTTCAAGGCTTAAATCTTACTTCATG	3' UTR	1	110653560	110674930	21371	2	3738	ENST00000685980.2	17925	ENSG00000177272	KCNA3	potassium voltage-gated channel subfamily A member 3	0.544211	0.803215	1.3301	0.862149	0.951591	0.119055	0.340792	0.785959	1.25071	0.829008	0.940684	0.463243	0.963964	1	0.662879	0.963944	0.987893	-0.263515
chr1	112854430	112854604	175	chr1:112854430-112854604	14	CTCAGGAGCCCAACTGGCTTCACCCAGTGGATCCCGCACGGGGCTGCAGGTGGAGCTGCCTGCCAGTTCCGCGCCGTGCGCCCGCACTCCTCAGCCCTTAGGTGGTCGATGGGACTGAGCACCGTGGAGCAGGGGGCGGCGCTCATCGGGGAGGCTCCGGCCGCATAGGAGCCCA	Intron (ENST00000658577.2/105378912, intron 1 of 1)	1	112820174	112850643	30470	2	100996702	ENST00000401018.5	-3787	ENSG00000215866	LINC01356	long intergenic non-protein coding RNA 1356	0.544211	0.803215	1.58413	0.427323	0.73461	-0.915201	0.667138	0.845217	1.291	0.122775	0.682531	-1.9152	0.479486	0.806744	1.08673	0.813506	0.943903	-0.0464459
chr1	112854604	112854778	175	chr1:112854604-112854778	11	ATGGAGTGGGTGGGAGGCTCAGGCATGGCGGGCTGCAGGTCCCGAGTCCTGCCCCGCGGGCAGGCAGCTAAGGCCCGGTGAGAAATCAAGCGCAGCGCCGGTGGGCTGGCACTGCTGGGGGACCCAGTACACCCTCCACAGCCACTGGCCCGGGTGCTAAGCCCGTCATTGCCCG	Intron (ENST00000658577.2/105378912, intron 1 of 1)	1	112820174	112850643	30470	2	100996702	ENST00000401018.5	-3961	ENSG00000215866	LINC01356	long intergenic non-protein coding RNA 1356	0.544211	0.803215	1.58413	0.427323	0.73461	-0.915201	0.667138	0.845217	1.291	0.122775	0.682531	-1.9152	0.479486	0.806744	1.08673	0.813506	0.943903	-0.0464459
chr1	113211356	113211534	179	chr1:113211356-113211534	2	AAAATGAATTAAGTATTAATGCGATATAGCTGAGTAGGCTATTCCCCCACTGTTAACTTGACAGAGTGGTACCAGGTGGGGTCCCACACACCTGGTGGGGGAGTAGTGGTCACCCCTGGAGGGGGCTTCTTTAGAAATACAGATATGCTTTGCGGGGTGAGCTGAATGGAAACTGCAGC	Distal Intergenic	1	113103201	113124997	21797	1	9860	ENST00000466161.1	108155	ENSG00000198799	LRIG2	leucine rich repeats and immunoglobulin like domains 2	0.152084	0.603103	25.42	0.461936	0.75726	1.21482	0.136921	0.726107	25.6112	0.61507	0.879899	0.586449	0.502306	0.806744	0.705476	0.393721	0.781216	1.43891
chr1	113497711	113497853	143	chr1:113497711-113497853	1	ACAGCTCAAGGAGGCCTGCCTGCCTCTGTAGGCTCCACCTCTGGGAGCAGGGCACAGACAAACAAAAAGGCAGCAGTAACCTCTGCAGACTTAAGTGTCCCTGTCTGACAGCTTTGAAGAGAGCAGTGGTTCTCCCAGCACGC	Intron (ENST00000307546.14/260425, intron 1 of 20)	1	113391261	113404455	13195	1	260425	ENST00000477955.1	106450	ENSG00000081026	MAGI3	membrane associated guanylate kinase, WW and PDZ domain containing 3	0.242809	0.603103	0.866124	0.436444	0.747579	-0.464269	0.436176	0.84435	0.615867	0.457865	0.830204	-0.513375	0.261387	0.704731	0.718442	0.530958	0.781216	-0.23586
chr1	113497853	113497995	143	chr1:113497853-113497995	3	CAGCTGGAGATCTGAGAACGGGCAGACTGCCTCCTCAAGTGGGTCCCTGACCCCTGACCCCCGAGCAGCCTAACTGGGAGGCACCCCCCAGCAGGGGCACACTGACACCTCACACGGCAGGGTATTCCAACAGACCTGCAGCT	Intron (ENST00000307546.14/260425, intron 1 of 20)	1	113391261	113404455	13195	1	260425	ENST00000477955.1	106592	ENSG00000081026	MAGI3	membrane associated guanylate kinase, WW and PDZ domain containing 3	0.242809	0.603103	0.866124	0.436444	0.747579	-0.464269	0.436176	0.84435	0.615867	0.457865	0.830204	-0.513375	0.261387	0.704731	0.718442	0.530958	0.781216	-0.23586
chr1	113744683	113744890	208	chr1:113744683-113744890	2	ATCATGCCTGCAATCCCAGCACTTTGGGAGGCTGAGGCAGGCAGATTCCCTGACCTCAGGGCGACCAGCCTGGGCAATATGGTAAAACCCTGTCTCTTATACTAAAATGCCAAAAATTAGCCGGGAGTAGCTGCTATGAGCCTGTAGTCCCAGCTACTCAGGAGGCTGAGGCAGGAGAATTCCTTGAATCAGGGAGGTGGAAGCTGCA	Intron (ENST00000369604.6/10745, intron 3 of 18)	1	113725669	113738786	13118	2	10745	ENST00000486855.1	-5897	ENSG00000116793	PHTF1	putative homeodomain transcription factor 1	0.154962	0.603103	2.31322	0.94386	0.951591	0.271642	0.421507	0.84435	1.70945	0.649048	0.879899	-0.264766	0.0754631	0.618083	2.01615	0.609273	0.792271	0.677901
chr1	113939230	113939372	143	chr1:113939230-113939372	0	CTGCAGCCTCTACCTCTGGGCTCAGGTGATCACTTCTGCCTTCTGAGTAGCTAGGACTACAGGCATGTGCCACCATGCCTGGCTAACTTTTTTTTCTGTTTTTTTTTTTTTTTGTTGTTGTTGTTGTTTGTTTGTTTTAGAGA	Intron (ENST00000426820.7/204851, intron 1 of 15)	1	113930728	113940702	9975	1	204851	ENST00000503968.1	8502	ENSG00000163349	HIPK1	homeodomain interacting protein kinase 1	1	1	-0.817518	0.891077	0.951591	0.455631	1	1	-0.688188	0.858173	0.940684	0.852578	0.983438	1	-0.576943	0.950293	0.986213	-0.186824
chr1	113944588	113944714	127	chr1:113944588-113944714	3	GTTCTCCTAGCTTGGCCTCCTGAGTAGCTGGGAATACAGGTGCCACCATGCCCAGCTAATTTTTGTATTTTTAGTAGAGACAGGGTTTCACCATGTTGGCCGGGATGGTCTCGATCTCTTGACCTCG	Intron (ENST00000426820.7/204851, intron 2 of 15)	1	113951145	113977804	26660	1	204851	ENST00000340480.8	-6431	ENSG00000163349	HIPK1	homeodomain interacting protein kinase 1	0.173089	0.603103	-24.0615	0.389207	0.704072	-22.6674	0.0550356	0.726107	-24.0615	0.753887	0.879899	-0.239211	0.325495	0.704731	-23.1319	0.350384	0.781216	-23.0615
chr1	113944776	113944927	152	chr1:113944776-113944927	0	TGGGTGTGAAGTGGTATCTCATTGTGGTTTTGATTTGTATTTCCCTAATGATTAATGATGTTGAGCATTTGTTTTATTTTGTTTTGTTTTGAGACAGAGTCCCACTTTGTCACCCAGGCTGGGGTGCAGTTGTGCAATCATGGCTTACTGCA	Intron (ENST00000426820.7/204851, intron 2 of 15)	1	113951145	113977804	26660	1	204851	ENST00000340480.8	-6218	ENSG00000163349	HIPK1	homeodomain interacting protein kinase 1	0.173089	0.603103	-24.0615	0.389207	0.704072	-22.6674	0.0550356	0.726107	-24.0615	0.753887	0.879899	-0.239211	0.325495	0.704731	-23.1319	0.350384	0.781216	-23.0615
chr1	115286363	115286526	164	chr1:115286363-115286526	7	CCCCAACCCACACGCTGACACTGTCACACACCGAGAATTCGCCCCTGTGGAAGATGGGATGGGATGATGACCGCTTGCTCCTGTGAGTCCTGTTGAAGGGGGCAGCACCACCGACCTCGAAGTCCAGATCCTGAGTGTCTGCAGCTTCACGGGGAGGCTGGGTG	5' UTR	1	115283034	115368072	85039	1	112840934	ENST00000425449.1	3329	ENSG00000228035	NGF-AS1	NGF antisense RNA 1	0.506552	0.782886	4.93376	0.428214	0.73461	1.79173	0.934592	0.999197	3.97029	0.590902	0.879899	0.833824	0.205398	0.681513	5.86337	0.373905	0.781216	2.54323
chr1	115286526	115286689	164	chr1:115286526-115286689	14	GCTAAACAGCACACGGGGTGAACGGAGTCGCCGCTTTTTAAACAGCCTGGGGTCCACAGTAATGTTGCGGGTCTGCCCCGCCACGCGTGCAGCTATCGCCGCTGCCGGGGCGCTGCGGGCTCTGCGAAGGGCAGTGTCAAGGGAATGCTGAAGTTTAGTCCAGT	5' UTR	1	115283034	115368072	85039	1	112840934	ENST00000425449.1	3492	ENSG00000228035	NGF-AS1	NGF antisense RNA 1	0.506552	0.782886	4.93376	0.428214	0.73461	1.79173	0.934592	0.999197	3.97029	0.590902	0.879899	0.833824	0.205398	0.681513	5.86337	0.373905	0.781216	2.54323
chr1	115286689	115286852	164	chr1:115286689-115286852	3	TGGGCTTGGGGGATGGTGTGTCCTGCAGGGACATTGCTCTCTGAGTGTGGTTCCGCCTGTATGCCGATCAGAAAAGCTGTGATCAGAGTGTAGAACAACATGGACATTACGCTATGCACCTGGAATGAAAAAGAAATGAGGGTGACTTCATGGAGTACTAAATG	5' UTR	1	115283034	115368072	85039	1	112840934	ENST00000425449.1	3655	ENSG00000228035	NGF-AS1	NGF antisense RNA 1	0.506552	0.782886	4.7688	0.428214	0.73461	1.65074	0.934592	0.999197	3.80533	0.590902	0.879899	0.69708	0.205398	0.681513	5.69841	0.373905	0.781216	2.40224
chr1	116146376	116146527	152	chr1:116146376-116146527	2	GTGAACTCACAAACCCTGAGCTAGACACAGGGTGCTGATTGGTGTGTTTACAATCCCTGAACTAGACATAAAGACTGTCCACGTCCCCACCAGACTCAGGAGCCCAGCTGGCTTCACCCAGTGGATCCCGCACTGGGGCTGCAGGTGGAGCA	Distal Intergenic	1	116164209	116167494	3286	1	107985190	ENST00000426515.2	-17682	NA	LINC01779	long intergenic non-protein coding RNA 1779	0.353872	0.603103	-23.6084	0.389207	0.704072	-21.5716	1	1	-1.26076	0.858173	0.940684	1.77396	0.22065	0.681513	-23.5066	0.244564	0.781216	-23.4362
chr1	116146527	116146678	152	chr1:116146527-116146678	11	AGTCTGCCAGTCCTGCGCCATGCGCTTGCACTTCTTAGCCCTTGGGCGGTCGATGGGACTAGGCGCCATGGAGCAGGGGGCGGCACTCGTCGGGGAGGCTCCCGGCCGCACAGGAACCCATGGAGGGGGTGGGAGGCTCAGGCATGGCGGGC	Distal Intergenic	1	116164209	116167494	3286	1	107985190	ENST00000426515.2	-17531	NA	LINC01779	long intergenic non-protein coding RNA 1779	0.353872	0.603103	-23.6084	0.389207	0.704072	-21.5716	1	1	-1.26076	0.858173	0.940684	1.77396	0.22065	0.681513	-23.5066	0.244564	0.781216	-23.4362
chr1	116146678	116146829	152	chr1:116146678-116146829	9	CTGCAGGTCCTGAGCCCTGCCCCGCGGTAAGGCAGCTAAGGCCCGGTGAGAAATCGAGCACAGCGCCAGTGGGCCGGCACTGCTGGGGGACCCAGTACACCCTCCGCAGCCACTGGCCCGGGTGCTAAGCCTCTCACTGCTGGGGGCCGGCA	Distal Intergenic	1	116164209	116167494	3286	1	107985190	ENST00000426515.2	-17380	NA	LINC01779	long intergenic non-protein coding RNA 1779	0.353872	0.603103	-23.1933	0.389207	0.704072	-21.5716	1	1	-1.01266	0.858173	0.940684	1.41194	0.22065	0.681513	-23.2052	0.244564	0.781216	-23.1348
chr1	116285144	116285286	143	chr1:116285144-116285286	2	CTGCAGCGTCCCCATAATACTCTGCACACTTCTCTCTCCTTACACTCCATTGTCTTTGAATTGATGTATTGGGAAGGTGACAGCTGTAAGTGATCCTTAGCGCAGGTCTGTGCTTCACTCATCTTTGCAGTTTAAACTGTCAG	Distal Intergenic	1	116289237	116297621	8385	2	105378920	ENST00000660713.1	12335	NA	LOC105378920	uncharacterized LOC105378920	0.329114	0.603103	24.8628	0.389207	0.704072	-24.6611	0.306975	0.726107	24.7269	0.717538	0.879899	-1.09249	0.614107	0.806744	1.36812	0.350384	0.781216	-24.62
chr1	118852938	118853100	163	chr1:118852938-118853100	3	TAACCTCTGCAGACTTAAGTGTCCCTGTCTGACAGCTTTGAAGAGAGCAGTGGTTCTCCCAGCACGCAGCTGGAGATCTGAGAACGGGCAGACTGCCTCCTCAAGTGGGTCCCTGACCCCTGACCCCCGAGCAGCCTAACTGGGAGGCACCCCCCAGCAGGGG	Distal Intergenic	1	118883047	118914125	31079	2	6913	ENST00000449873.5	61025	ENSG00000092607	TBX15	T-box transcription factor 15	0.979795	1	-0.777104	0.253507	0.704072	1.95785	0.717805	0.863081	0.145364	0.424264	0.828721	1.15705	0.74634	0.871076	-1.16842	0.180043	0.781216	2.26572
chr1	118853100	118853262	163	chr1:118853100-118853262	1	GCACACTGACACCTCACACAGCAGGGTATTCCAACAGACCTGCAGCTGAGGGTCCTGTCTGTTAGAAGGAAAACTAACAACCAGAAAGGACATCTACACCGAAAACCCATCTGTACATCACCATCATCAAAGACCAAAAGTAGATAAAACCACAAAGATGGGG	Distal Intergenic	1	118883047	118914125	31079	2	6913	ENST00000449873.5	60863	ENSG00000092607	TBX15	T-box transcription factor 15	0.979795	1	-0.777104	0.253507	0.704072	1.95785	0.717805	0.863081	0.145364	0.424264	0.828721	1.15705	0.74634	0.871076	-1.16842	0.180043	0.781216	2.26572
chr1	119639121	119639410	290	chr1:119639121-119639410	1	GCAGTGTCCATTTCTGTTAAAGCCGTCTTTGTTCTTACTCAGAAGCTCAAAACCATGGACTCAACTTTGACCCATCCCTCACCCCTTTCAATCAAATCAGTTGCCATGTTCTTTTCACTTTTCTCTTTTTTTCAGTTGCCACTATCACTGCAGTACACACTCTTACTAGTTAACATGCACCTACATGTCACTACTGCATCAATCTTAAAATGTTGTCACTTTATTATTCTGCTCAGAAACCCCTAAGTGACTTGGTCATATAAGCACAGACTCCAAGTCATTAACAATGT	Intron (ENST00000421812.3/90874, intron 1 of 2)	1	119619377	119648266	28890	2	90874	ENST00000421812.3	8856	ENSG00000143067	ZNF697	zinc finger protein 697	0.939438	1	1.03544	0.456774	0.75726	-0.33984	0.55428	0.845217	0.0719669	0.131414	0.682531	-1.33984	0.457244	0.806744	1.96505	0.841784	0.958968	0.528915
chr1	119639526	119639673	148	chr1:119639526-119639673	4	TCAAAGCATGGGTTACAGTCTGTCCTTTTCCGGAGGCAGCAGCACCTGTAATGGTTAAAAGCTCAGATTCTGGCCAGGCATAGTGGCTCACGCCTGTAATCCCAGCACTTTTGGGGGCCAAAGCCAGTGGATCGCTTAAGCTCGGGAG	Intron (ENST00000421812.3/90874, intron 1 of 2)	1	119619377	119648266	28890	2	90874	ENST00000421812.3	8593	ENSG00000143067	ZNF697	zinc finger protein 697	0.939438	1	1.03544	0.456774	0.75726	-0.33984	0.55428	0.845217	0.0719669	0.131414	0.682531	-1.33984	0.457244	0.806744	1.96505	0.841784	0.958968	0.528915
chr1	119722699	119722994	296	chr1:119722699-119722994	2	AAGTGAGACCCCCATCTCTACAAAAATACAAAAAAAAAAAAAGAAGGAAAGAAAAGCCAGGTATGTTGGCACCAGCCTGTAGTCTCAGCTACTGAGAAGGTTGAGCTGGAAGGATTGCTTGAACCCTGGGAAGTCAAGGCTGCAGTGAGCTGTGATCATGCCAGTACACTCCAGCCTGGGTGACAGAGCGAGGCCTTGTCAAAAAAAAAAAAAAAAAGCCAGGTTGGGTAACTTGATGAAGATATGTAGGCATTGGACTGAGCCCTGAATTCGAGAGACTCTGACCTTGGTAAGAT	Promoter (1-2kb)	1	119721276	119744215	22940	1	26227	ENST00000641811.1	1423	ENSG00000092621	PHGDH	phosphoglycerate dehydrogenase	0.353872	0.603103	-22.2884	0.389207	0.704072	-22.1572	0.184235	0.726107	-22.2884	0.210736	0.682531	-22.1572	0.501742	0.806744	-21.3588	0.523999	0.781216	-21.2884
chr1	119821889	119822035	147	chr1:119821889-119822035	1	TCTGCAGTTTGCTAAGGGTTCACTTCAGGCCATATTCATCTGTTTTTCTCCCATGCCTAGGGATGTCACTCAAGGAGCCTGGAGAACAGCAAAGATGGGTGCTTGCTCCTTCTTCTGGGACCTCTGACCTCGAGGGGCACCAACCTG	Distal Intergenic	1	119801172	119811580	10409	2	83998	ENST00000369401.4	-10309	ENSG00000134193	REG4	regenerating family member 4	0.972134	1	1.32874	0.205257	0.704072	-24.9844	0.690137	0.845217	0.365264	0.070489	0.576841	-24.9844	0.614107	0.806744	2.25835	0.350384	0.781216	-24.1157
chr1	120944929	120945078	150	chr1:120944929-120945078	7	CAAGGTGTGAGCGGGGCTAAGAATGGGAAAGCGAGTGGCTTTCGCCGGAGAAGCTGCAGTTGTCACCTGTAGAGGGGCCAGCGACTTTTGAGAGGGTGAAGAGCAGGCGGGGGAAGCAGTGAAGAGCAGACGGTGAGGAGCAGGTGGCCC	Promoter (2-3kb)	1	120942600	120942763	164	1	101954264	ENST00000612985.1	2329	ENSG00000277610	RNVU1-4	RNA, variant U1 small nuclear 4	0.353872	0.603103	-22.7294	0.205257	0.704072	-24.5284	0.690137	0.845217	0.598132	0.070489	0.576841	-24.5284	0.325495	0.704731	-23.7301	0.350384	0.781216	-23.6597
chr1	121289059	121289336	278	chr1:121289059-121289336	19	CGGGGCTGCAGGTGGAGCTGCCTGCCAGTCCTGCGCTGTGCGCTCGCATTCCTCAGCCCTTGGGTGGTCGATGGGACTGGGCGCCATGGAGCAGGGGGTGGTGCTCGTCGGGGAGGCTCCGGCCGCACAGGAGCCCATGGAGTGGGTGGGAGGCTCAGACATGGCGGGCTGCAGGTCCTGAGCCCTGCCCCGCGGGAAGGCAGCTAAGGCCCAGCGAGAAATCGAGCACAGCGCCGATGGTCCGGCACTGCTGGGGGACTCAGTACACCCTCCGCAGC	Intron (ENST00000367123.8/653464, intron 3 of 9)	1	121187102	121387966	200865	1	653464	ENST00000304465.7	101957	ENSG00000171943	SRGAP2C	SLIT-ROBO Rho GTPase activating protein 2C	0.173089	0.603103	-24.4397	0.292615	0.704072	23.1382	0.234049	0.726107	-3.48517	0.176959	0.682531	23.8055	0.22065	0.681513	-23.7315	0.950293	0.986213	0.0225492
chr1	122387656	122387834	179	chr1:122387656-122387834	2	TATCTGCAAGTGGAGATTTGGAACGCTTTGAGGCCTACGGTAGTAAAGGAAACAGCTTCATGTAAAAACTGGACAGAAGCATTCTCAGAAAATACTTTGTGATGATTGAGTTTAACTCACAGAGCTGAACATGCCTTTGGGTGGAGCAGTTTGGAAACACACTTTTTGCAGAATCTGCA	Distal Intergenic	1	121573946	121580524	6579	2	107985195	ENST00000450546.1	-807132	NA	LINC01691	long intergenic non-protein coding RNA 1691	0.353872	0.603103	-22.3836	0.389207	0.704072	-22.2523	0.184235	0.726107	-22.3836	0.210736	0.682531	-22.2523	0.501742	0.806744	-21.454	0.523999	0.781216	-21.3836
chr1	143326693	143326920	228	chr1:143326693-143326920	14	TGGCTGCAGTGTCCATCGCTGCCACCAACCACAAACAGGGCTGCAAACAGGAAGGATTTTATTCACTGTCCATGCGGCCCTGAGTTGTCCCAAAGCGAGGCAGTGCCCCCAAGGTCTGTGCAGAGCAGAACGCAGCTCCGCCCTCGCGGTGCCACCGGCCCGCCCGCCCGCGTCTCTGCTGAGGAGAACATTGCTCTGCCTTCGCTGTATCTCCGAAGTCTGCAGAGG	Distal Intergenic	1	143419625	143420207	583	2	107985200	ENST00000622095.1	93287	ENSG00000232527	LOC107985200	uncharacterized LOC107985200	0.899235	1	1.63015	0.784959	0.951591	1.83539	0.846186	0.971115	0.711295	0.950117	0.960572	0.880014	0.682605	0.838118	2.43198	0.600441	0.784916	2.57637
chr1	143336761	143337017	257	chr1:143336761-143337017	4	GGCTGCAGTGCAGTGGTACAATCTCAGCTCACTGCAATCTCTGCCTCCTGGGTTCAAGCGATTCTCCTGCCTCAGCCTCCCAAACTGCTGGGACTACAGGCACCCACCACCACACCCGGCTAATTTTTTATTTTTATTTTTGTATTTTTAGTAGAGATGAGGTTTCACTATGTTGGCCAGGCTGGTCTTGAACTCCTGACCTCGTGATCCCCCTGCTGCAGCCTCCCAAAGTGCTAGGATTACAGGCGTGAGCCACC	Distal Intergenic	1	143419625	143420207	583	2	107985200	ENST00000622095.1	83190	ENSG00000232527	LOC107985200	uncharacterized LOC107985200	0.329114	0.603103	22.8099	NA	NA	0	0.306975	0.726107	22.7114	0.27781	0.682531	22.7489	0.614107	0.806744	1.28404	0.350384	0.781216	-22.6045
chr1	143439845	143439998	154	chr1:143439845-143439998	2	GCTGCAGAGGCACAGAAGGTCAGCAACAGCAGGTGGCTGCATGCAGGGGCACTAATAATTACTCATTTTATACAAACTGTTTAGCAACAATGTTAGCTATTCTACTGCTGACTTTACGAACAGAGAAAATGTGGCCGGACACAATGGCTCCTAC	Distal Intergenic	1	143419625	143420207	583	2	107985200	ENST00000622095.1	-19638	ENSG00000232527	LOC107985200	uncharacterized LOC107985200	0.353872	0.603103	-23.4618	0.389207	0.704072	-23.3306	0.184235	0.726107	-23.4618	0.210736	0.682531	-23.3306	0.501742	0.806744	-22.5322	0.523999	0.781216	-22.4618
chr1	144152073	144152300	228	chr1:144152073-144152300	13	TGGCTGCAGTGTCCATCGCTGCCACCAACCACAAACAGGGCTGCAAACAGGAAGGATTTTATTCACTGTCCATGCGGCCCTGAGTTGTCCCAAAGCGAGGCAGTGCCCCCAAGGTCTGTGCAGAGCAGAACGCAGCTCCGCCCTCGCGGTGCCACCGGCCCGCCCGCCCGGGTCTCTGCTGAGGAGAACATTGCTCTGCCTTCGCTGTATCTCCGAAGTCTGCAGAGG	Distal Intergenic	1	144245027	144245821	795	2	100996732	ENST00000457390.1	93521	ENSG00000232527	LINC02802	long intergenic non-protein coding RNA 2802	0.583211	0.813605	-1.5426	0.497092	0.783633	-1.33736	1	1	-2.50608	0.920918	0.940684	-2.33736	0.236697	0.690204	-0.612993	0.197631	0.781216	-0.468603
chr1	144162333	144162556	224	chr1:144162333-144162556	3	GGCTGCAGTGCAGTGGTACAATCTCAGCTCACTGCAATCTCTGCCTCCTGGGTTCAAGCGATTCTCCTGCCTCAGCCTCCCAAACTGCTGGGACTACAGGCACCCACCACCACACCCGGCTAATTTTTTATTTTTATTTTTGTATTTTTAGTAGAGATGAGGTTTCACTATGTTGGCCAGGCTGGTCTTGAACTCCTGACCTCGTGATCCCCCTGCTGCAGCCT	Distal Intergenic	1	144245027	144245821	795	2	100996732	ENST00000457390.1	83265	ENSG00000232527	LINC02802	long intergenic non-protein coding RNA 2802	0.329114	0.603103	23.2954	NA	NA	0	0.306975	0.726107	22.703	0.27781	0.682531	22.7404	0.614107	0.806744	2.76946	0.350384	0.781216	-22.5961
chr1	144203861	144204003	143	chr1:144203861-144204003	1	CTGCAGCTTCGACCTCCTGTGCTCAAGCAATCCTCCCATCTCAGCCTCCTGAGTACCTGGGACCACAGGCATGTGCCACCACACCTGGTTAATTTTAAAAACTTTTTTTGTTTTTGAGAGAGAGTTTCACTCTTGTTGCCTAG	Intron (ENST00000616358.1/ENST00000616358.1, intron 6 of 6)	1	144245027	144245821	795	2	100996732	ENST00000457390.1	41818	ENSG00000232527	LINC02802	long intergenic non-protein coding RNA 2802	NA	NA	0	0.123414	0.704072	23.5383	0.306975	0.726107	22.5008	0.27781	0.682531	22.5383	0.325495	0.704731	-22.4643	0.0361852	0.781216	23.5383
chr1	144265458	144265609	152	chr1:144265458-144265609	2	CTGCAGAGGCACAGAAGGTCAGCAACAGCAGGTGGCTGCATGCAGGGGCACTAATAATTACTCATTTTATACAAACTGTTTAGCAACAATGTTAGCTATTCTACTGCTGACTTTACGAACAGAGAAAATGTGGCCGGACACAATGGCTCCTA	Distal Intergenic	1	144227029	144250326	23298	2	100996732	ENST00000452399.6	-15132	ENSG00000232527	LINC02802	long intergenic non-protein coding RNA 2802	0.353872	0.603103	-23.4618	0.389207	0.704072	-23.3306	0.184235	0.726107	-23.4618	0.210736	0.682531	-23.3306	0.501742	0.806744	-22.5322	0.523999	0.781216	-22.4618
chr1	144700766	144700918	153	chr1:144700766-144700918	2	GTAGGAGCCATTGTGTCCGGCCACATTTTCTCTGTTCGTAAAGTCAGCAGTAGAATAGCTAACATTGTTGCTAAACAGTTTGTATAAAATGAGTAATTATTAGTGCCCCTGCATGCAGCCACCTGCTGTTGCTGACCTTCTGTGCCTCTGCAG	Intron (ENST00000441760.2/105371214, intron 2 of 3)	1	144716025	144758296	42272	1	645166	ENST00000692166.2	-15107	ENSG00000232527	LSP1P5	LSP1 pseudogene 5	0.353872	0.603103	-23.4618	0.389207	0.704072	-23.3306	0.184235	0.726107	-23.4618	0.210736	0.682531	-23.3306	0.501742	0.806744	-22.5322	0.523999	0.781216	-22.4618
chr1	144762378	144762529	152	chr1:144762378-144762529	1	GCACTGTAGCCTAGGCAACAAGAGTGAAACTCTCTCTCAAAAACAAAAAAAGTTTTTAAAATTAACCAGGTGTGGTGGCACATGCCTGTGGTCCCAGGTACTCAGGAGGCTGAGATGGGAGGATTGCTTGAGCACAGGAGGTCGAAGCTGCA	Intron (ENST00000441760.2/105371214, intron 2 of 3)	1	144716073	144739347	23275	1	645166	ENST00000690033.2	46305	ENSG00000232527	LSP1P5	LSP1 pseudogene 5	NA	NA	0	0.123414	0.704072	23.2947	0.306975	0.726107	22.2572	0.27781	0.682531	22.2947	0.325495	0.704731	-22.2207	0.0361852	0.781216	23.2947
chr1	144762619	144762663	45	chr1:144762619-144762663	0	CTACACCATGGAATATTATGCAGCCTTAAAAAAAGAATGAAATCA	Intron (ENST00000441760.2/105371214, intron 2 of 3)	1	144716073	144739347	23275	1	645166	ENST00000690033.2	46546	ENSG00000232527	LSP1P5	LSP1 pseudogene 5	NA	NA	0	0.123414	0.704072	23.2947	0.306975	0.726107	22.2572	0.27781	0.682531	22.2947	0.325495	0.704731	-22.2207	0.0361852	0.781216	23.2947
chr1	144803828	144804075	248	chr1:144803828-144804075	3	GGCTGCAGCAGGGGGATCACGAGGTCAGGAGTTCAAGACCAGCCTGGCCAACATAGTGAAACCTCATCTCTACTAAAAATACAAAAATAAAAATAAAAAATTAGCCGGGTGTGGTGGTGGGTGCCTGTAGTCCCAGCAGTTTGGGAGGCTGAGGCAGGAGAATCGCTTGAACCCAGGAGGCAGAGATTGCAGTGAGCTGAGATTGTACCACTGCACTGCAGCCTGGGAGACAGAGCAGGACTCTGTCT	Intron (ENST00000441760.2/105371214, intron 2 of 3)	1	144716073	144739347	23275	1	645166	ENST00000690033.2	87755	ENSG00000232527	LSP1P5	LSP1 pseudogene 5	0.329114	0.603103	23.2954	NA	NA	0	0.306975	0.726107	23.2426	0.27781	0.682531	23.2801	0.614107	0.806744	1.1845	0.350384	0.781216	-23.1357
chr1	144814265	144814489	225	chr1:144814265-144814489	13	TCTGCAGACTTCGGAGATACAGCGAAGGCAGAGCAATGTTCTCCTCAGCAGAGACCCGGGCGGGCGGGCCGGTGGCACCGCGAGGGCGGAGCTGCGTTCTGCTCTGCACAGACCTTGGGGGCACTGCCTCGCTTTGGGACAACTCAGGGCCGCATGGACAGTGAATAAAATCCTTCCTGTTTGCAGCCCTGTTTGTGGTTGGTGGCAGCGATGGACACTGCAGCC	Intron (ENST00000441760.2/105371214, intron 2 of 3)	1	144716073	144739347	23275	1	645166	ENST00000690033.2	98192	ENSG00000232527	LSP1P5	LSP1 pseudogene 5	0.603188	0.821254	-3.03729	0.692012	0.951591	-2.83205	0.250573	0.726107	-4.00077	0.301844	0.682531	-3.83205	1	1	-2.10768	0.950293	0.986213	-1.96329
chr1	144990855	144991032	178	chr1:144990855-144991032	11	GATTTCTCGCTGGGCCTTAGCTGCCTTCCCGCGGGGCAGGGCTCGGGACCTGCAGCCCGCCATGTCTGAGCCTCCCACCCACTCCATGGGCTCCTGTGCGGCCGGAGCCTCCCCGACGAGCACCACCCCCTGCTCCATGGCGCCCAGTCCCATCGACCACCCAAGGGCTGAGGAATGC	Intron (ENST00000612199.4/647135, intron 3 of 9)	1	144897236	144955446	58211	2	647135	ENST00000621582.1	-35409	ENSG00000196369	SRGAP2B	SLIT-ROBO Rho GTPase activating protein 2B	0.173089	0.603103	-24.0984	0.292615	0.704072	22.9158	0.234049	0.726107	-3.14387	0.176959	0.682531	23.518	0.22065	0.681513	-23.444	0.950293	0.986213	0.118654
chr1	144991032	144991209	178	chr1:144991032-144991209	6	CGAGCGCACAGCGCAGGACTGGCAGGCAGCTCCACCTGCAGCCCCGGTGCGGGATCCACTAGATGAAGCCAACTGGGCTCCTGAGTCTGGTGGGGACGTGGAAAGTCTTTATATGTAGCTCAGGGATTGTAAATACACCAATCAGCACCCTGTGTTTAGCTCAAGGTTTGTGAGTGCA	Intron (ENST00000612199.4/647135, intron 3 of 9)	1	144897236	144955446	58211	2	647135	ENST00000621582.1	-35586	ENSG00000196369	SRGAP2B	SLIT-ROBO Rho GTPase activating protein 2B	0.173089	0.603103	-24.0984	0.292615	0.704072	22.9158	0.234049	0.726107	-3.14387	0.176959	0.682531	23.518	0.22065	0.681513	-23.444	0.950293	0.986213	0.118654
chr1	145872808	145872961	154	chr1:145872808-145872961	4	CGCTGCAGCCGCTGGCTCAGGGACTGTAGCTCCCTCTGCAACCTCTGCCGCTCCCGCCCCAACTCCCCTAACTCCTCCAGCAAGTTACTGTTGCTCAGTCTCAGTACTGACATCTCCTTCTCCAGCTGTCCCTTTGCCAGGCCTCCTAGGGCCT	Exon (ENST00000544626.2/148741, exon 8 of 12)	1	145866560	145885866	19307	2	148741	ENST00000544626.2	12905	ENSG00000198483	ANKRD35	ankyrin repeat domain 35	0.315806	0.603103	0.645899	0.343326	0.704072	-1.07452	0.514265	0.845217	0.290603	0.211209	0.682531	-1.44141	0.243956	0.704731	0.742529	0.635557	0.811387	-0.488015
chr1	146531749	146531900	152	chr1:146531749-146531900	0	AGCTGCTTCCACATTTTCAGGTTTCATTATAGCAATGCCTCACTATTTGGTACAAATTTTCTGTATTAGTCCCTTCTCACACTGCTATAAAGACATACCTGAGACTGGGTAATTTATGAAGAAAAGATGTTTAATTGACTCACCATTCTGCA	Intron (ENST00000649458.1/100288805, intron 3 of 7)	1	146526907	146641639	114733	1	100288805	ENST00000648235.1	4842	NA	HYDIN2	HYDIN axonemal central pair apparatus protein 2 (pseudogene)	0.329114	0.603103	23.5973	0.891077	0.951591	0.302867	0.306975	0.726107	23.6475	0.753887	0.879899	-0.697133	0.649975	0.806744	0.972767	0.561579	0.781216	1.17162
chr1	146722278	146722454	177	chr1:146722278-146722454	3	GAGTTTCCAGTTTTTCTGTTCTGTTTTTTCCCCATCTTTGCGGTTTTATCTACTTTTGGTCTTTGATGATGGTGATGTACAGATGGGTTTTCGGTGTAGATGTCCTTTCTGGTTGTTAGTTTTCCTTCTAACAGACAGGACCCTCAGCTGCAGGTCTGTTGGAATACCCTGCCGTGT	Intron (ENST00000614586.3/100288805, intron 18 of 78)	1	146743160	146779280	36121	1	100288805	ENST00000650199.1	-20706	NA	HYDIN2	HYDIN axonemal central pair apparatus protein 2 (pseudogene)	0.157171	0.603103	0.58371	0.361732	0.704072	-0.475658	0.577618	0.845217	0.292578	0.279157	0.682531	-0.409653	0.0635927	0.578892	0.627865	0.562416	0.781216	-0.3291
chr1	146722454	146722630	177	chr1:146722454-146722630	3	TGAGGTGTCAGTGTGCCCCTGCTGGGGGGTGCCTCCCAGTTAGGCTGCTCGGGGGTCAGGGGTCAGGGACCCACTTGAGGAGGCAGTCTGCCCGTTCTCAGATCTCCAGCTGCGTGCTGGGAGAACCACTGCTCTCTTCAAAGCTGTCAGACAGGGACACTTAAGTCTGCAGAGGTT	Intron (ENST00000614586.3/100288805, intron 18 of 78)	1	146743160	146779280	36121	1	100288805	ENST00000650199.1	-20530	NA	HYDIN2	HYDIN axonemal central pair apparatus protein 2 (pseudogene)	0.157171	0.603103	0.58371	0.361732	0.704072	-0.475658	0.577618	0.845217	0.292578	0.279157	0.682531	-0.409653	0.0635927	0.578892	0.627865	0.562416	0.781216	-0.3291
chr1	147052758	147052939	182	chr1:147052758-147052939	4	TCCGATCTCTCCTTAACTCCCACGACGCTATCCCTTTTAGTTGAACTAACATAGTGATGCGTTCAAAGCCAAGCAAAATGCACACCCTTTTTTTGTGACAAGTCATCTCTGTACATGTGTATACATATTAGAAGGGAAAGATGTTAAGATATGTGGCCTGTGGGTTACACAGGGTGCCTGCA	Intron (ENST00000444082.2/728989, intron 3 of 14)	1	147019656	147056593	36938	2	728989	ENST00000444082.2	3654	NA	LOC728989	phosphodiesterase 4D interacting protein pseudogene	0.152084	0.603103	25.1882	0.945411	0.951591	-0.707162	0.136921	0.726107	25.1019	0.425083	0.828721	0.642969	0.479486	0.806744	1.25701	0.566733	0.781216	-1.45849
chr1	147438671	147438822	152	chr1:147438671-147438822	0	AATGTTTAAGAAAAGTGTTATCTCTGGGGTTAGCCATGTGAAGGGAAGACCCAAAGACAAACAGGGAGTAGAAATTAAAACAAACAAAAACCTCTGGCAAACTTTCCTATGGCCTAAGCACAAGGTATCACTGGAGAAATTTGAAGTCTGCA	Intron (ENST00000619867.4/100289211, intron 3 of 5)	1	147258885	147517875	258991	2	100289211	ENST00000619867.4	79053	ENSG00000278811	LINC00624	long intergenic non-protein coding RNA 624	0.329114	0.603103	24.4453	0.389207	0.704072	-24.2437	0.484642	0.84435	23.4818	0.210736	0.682531	-24.2437	0.167938	0.681513	24.4453	0.523999	0.781216	-23.3749
chr1	147680724	147680877	154	chr1:147680724-147680877	10	GGCTGCAGGTGGAGCCGCCTGCCAGTCCCACGCCATGCGCCGGCACTCCTCACCTCTTGGGTGGTCGATGGGACTGGGCGCCATGGAGCAGGGGGCGGCACTCATCGGGGAGGCTCGGGCCCCACAGGAGTCCACGGAGGGGGTGGGAGGCTCA	Distal Intergenic	1	147642230	147670524	28295	2	51205	ENST00000583509.7	-10200	ENSG00000162836	ACP6	acid phosphatase 6, lysophosphatidic	0.173089	0.603103	-25.0472	0.292615	0.704072	23.925	0.0550356	0.726107	-25.0472	0.27781	0.682531	24.1916	0.325495	0.704731	-24.1176	0.596098	0.781216	0.652762
chr1	147680877	147681030	154	chr1:147680877-147681030	11	AGGCATGGCGAGCTGCAGGTCCCGAGCCCTGCCCCGTGGGAAGGCAGCTAAGGCCCGGCGAGAAATCGAGCGCAGCGCCGGTGGGCTGGCACTGCTGGGGGACCCAGTACACCCTCCGCAGCTGCTGGCCCGGGTGCTAAGCCAGTCATTGCCC	Distal Intergenic	1	147642230	147670524	28295	2	51205	ENST00000583509.7	-10353	ENSG00000162836	ACP6	acid phosphatase 6, lysophosphatidic	0.173089	0.603103	-25.0472	0.292615	0.704072	23.925	0.0550356	0.726107	-25.0472	0.27781	0.682531	24.1916	0.325495	0.704731	-24.1176	0.596098	0.781216	0.652762
chr1	147908192	147908345	154	chr1:147908192-147908345	16	GCTGCAGATCATCTTCGTCTCCACCCCGTCCCTGATGTACGTGGGGCACGCGGTGCACTACGTCCGCATGGAGGAGAAGCGCAAAAGCCGCGAGGCGGAGGAGCTGGGCCAGCAGGCGGGGACTAACGGCGGCCCGGACCAGGGCAGCGTCAAG	Exon (ENST00000369235.2/2703, exon 2 of 2)	1	147902795	147909269	6475	1	2703	ENST00000369235.2	5397	ENSG00000121634	GJA8	gap junction protein alpha 8	0.329114	0.603103	23.7467	0.123414	0.704072	25.1458	0.484642	0.84435	22.7832	0.27781	0.682531	24.1458	0.167938	0.681513	23.7467	0.0361852	0.781216	25.1458
chr1	147908353	147908652	300	chr1:147908353-147908652	11	GCGGCAGCAAAGGCACTAAGAAGTTCCGGCTGGAGGGGACCCTGCTGAGGACCTACATCTGCCACATCATCTTCAAGACCCTCTTTGAAGTGGGCTTCATCGTGGGCCACTACTTCCTGTACGGGTTCCGGATCCTGCCTCTGTACCGCTGCAGCCGGTGGCCCTGCCCCAATGTGGTGGACTGCTTCGTGTCCCGGCCCACGGAGAAAACCATCTTCATCCTGTTCATGTTGTCTGTGGCCTCTGTGTCCCTATTCCTCAACGTGATGGAGTTGGGCCACCTGGGCCTGAAGGGGATCC	Exon (ENST00000369235.2/2703, exon 2 of 2)	1	147902795	147909269	6475	1	2703	ENST00000369235.2	5558	ENSG00000121634	GJA8	gap junction protein alpha 8	0.329114	0.603103	23.7467	0.123414	0.704072	25.1458	0.484642	0.84435	22.7832	0.27781	0.682531	24.1458	0.167938	0.681513	23.7467	0.0361852	0.781216	25.1458
chr1	148056614	148056859	246	chr1:148056614-148056859	1	CTGCAGCTTGTTTTTCCTCTTGGGAAACTCAGCAGCAGGATTTTTCCCTCAGAGAAACATCACATTTAAAGCATACATAGAAAAAGGTGGGGTTTTTTTCATAAAAAGTCTTAGTTTTCTTATTGTAAATTTAAACACATGGTTATTACTGTTCTTAAGCTAATTGGGCTAGCCTGGGCAACACAGTGAGACCCCGTAACTATGAAAAATAAAAACACTAGGCAGGCATGGTGGCATGTGCCTGCA	Distal Intergenic	1	148038753	148038916	164	2	26864	ENST00000383858.1	-17698	ENSG00000206585	RNVU1-7	RNA, variant U1 small nuclear 7	0.0733743	0.603103	25.6661	0.500398	0.783633	0.518317	0.0628079	0.726107	25.7044	0.851522	0.940684	-0.176309	0.350445	0.742895	0.996412	0.298474	0.781216	1.03214
chr1	148093334	148093536	203	chr1:148093334-148093536	0	CTGCAGAGTGTCCTCTTCTTCCTACAACAGGCTGCTTCTATATGTGCATGTTTCATGCTAAGCACTTCTTTCTTGGGTGGAGATGACAAAGGCCCCTTTCTGCTGAGACAAAGTGATTTGGAGAGTCACTTGGCCCCTGAAGAGGGAGTGGTAGGATCCAGCCACCCAGTGTGCAGTGAATTGGAGCAGGGATCTCAGGACAC	Intron (ENST00000420737.2/728920, intron 10 of 10)	1	148080598	148093883	13286	1	728920	ENST00000420737.2	12736	NA	PDE4DIPP1	PDE4DIP pseudogene 1	0.329114	0.603103	24.4453	0.389207	0.704072	-24.2437	0.484642	0.84435	23.4818	0.210736	0.682531	-24.2437	0.167938	0.681513	24.4453	0.523999	0.781216	-23.3749
chr1	148151552	148151751	200	chr1:148151552-148151751	23	GGGCTGCAGCGGCAGGCGAGGAATCAAGCGCAGGGAACTTAGGCCCCGGCGGAGCCCTGCGGAGCCCGGCAGTGCCCGGCGCAACCGCCCCGCTCGCCTAACAAAACTTGCGGCGGCCCAGCCCGCCGCGCCTCAGCCCAGCTGTGAGCCCGCAGGTCCCAGACTCACCTCCCGCCCGGCCTGGCGCGGCGCCCTCACCT	Promoter (<=1kb)	1	148102151	148151988	49838	2	200030	ENST00000614506.4	237	ENSG00000263956	NBPF11	NBPF member 11	0.329114	0.603103	25.5233	0.389207	0.704072	-25.3217	0.484642	0.84435	24.5599	0.210736	0.682531	-25.3217	0.167938	0.681513	25.5233	0.523999	0.781216	-24.4529
chr1	148151751	148151950	200	chr1:148151751-148151950	20	TCCGGAACGCTGGGTGGACTTCGCAGTAAACTTGAACTTCCCATCCAGGCTGCAGCCGTGCCGCCGTACCTCGGCCCCGCTCCTGGCGCCGCAGGTCGCCCGTCCCGCGTTCCCAAAATCACCAGGCTCACTCAGAAGCTCAGGCAGCCTCGCGACCCTCACCTACCCCTCCCAGCACCGCCGCTATCTCCACCGCCGCC	Promoter (<=1kb)	1	148102151	148151988	49838	2	200030	ENST00000614506.4	38	ENSG00000263956	NBPF11	NBPF member 11	0.972134	1	4.7351	0.389207	0.704072	-25.1612	0.690137	0.845217	3.77162	0.717538	0.879899	-5.38907	0.614107	0.806744	5.66471	0.350384	0.781216	-24.3483
chr1	149639093	149639242	150	chr1:149639093-149639242	9	CAAGGTGTGAGCGGGGCTAAGAATGGGAAAGCGAGTGACTTTCGCCGGAGAAGCTGCAGTTGTCACCTGTAGAGGGGCCGGCGACTTTTGAGACGGTGAAGAGCAGGCGGGGGAAGCAGTGAAGAGCAGACGGTGAGGAGCAGGTGGCCC	Promoter (2-3kb)	1	149636650	149672793	36144	1	57234	ENST00000430442.2	2443	ENSG00000277147	LINC00869	long intergenic non-protein coding RNA 869	0.353872	0.603103	-24.9773	0.39901	0.71143	-4.47906	1	1	-1.89434	0.114587	0.682531	-5.47906	0.22065	0.681513	-24.6323	0.785469	0.928082	-3.6103
chr1	149639242	149639391	150	chr1:149639242-149639391	7	CTTTGGCCGTTGGAGTCCCCCAGCTGACTCTGCCCGGGTAGAACGTCCAAAGTGCCCAAAGACTCGACTCTTGGCTTCATTGTCTCCCGTATTCTGGGTTTCTGGAGTGCGCGGGATTGGACAGGCATCAAATATATGAGATTATCTGCA	Promoter (2-3kb)	1	149636650	149672793	36144	1	57234	ENST00000430442.2	2592	ENSG00000277147	LINC00869	long intergenic non-protein coding RNA 869	0.353872	0.603103	-24.9773	0.39901	0.71143	-4.43458	1	1	-2.0322	0.114587	0.682531	-5.43458	0.22065	0.681513	-24.5878	0.785469	0.928082	-3.56582
chr1	150499861	150500123	263	chr1:150499861-150500123	1	CTGCAGGAATCACTTTCCAATCTGAAAGGTGAGTGTTGGCCAAGTAAAGATGTGTTTCAGGAGGGAACAGTGTAGGCAGAGGCTGGGGATAAGGATGAAAACACATGGCAGACCAATCTGGGCAACACAGGGAGACCCTGTGTCTACCAAAAAAAAAAAAAAAAATTAGCCGGGTGCAGTAGCTTGTGCCTGTGGTCCCAGCTACCCAGCAGGCTGAGATGGGAGGATCACCTGGTCCCAGGAGGTAGAGGCTGCAGTGAGCC	Intron (ENST00000369054.6/80222, intron 9 of 13)	1	150504333	150506935	2603	1	80222	ENST00000483046.1	-4210	ENSG00000143374	TARS2	threonyl-tRNA synthetase 2, mitochondrial	0.173089	0.603103	-25.0796	0.945411	0.951591	-0.176986	0.484628	0.84435	-1.13513	0.639663	0.879899	0.537722	0.152032	0.681513	-25.034	0.757708	0.912001	-0.723834
chr1	150609109	150609259	151	chr1:150609109-150609259	5	CTGGAGTGCAGTGGTGCGATCTCAGCTCACTGAAACCTCCGCCTCTTAGGTTCAAGCGATTCTTGTGCCTCAGCCTCCCGAGTAGCTGGGATTAAGGCACACGCCACCACACCCAGCTAATTTTTGTATTTTTAGTAGAGATGGGGTTTCA	Intron (ENST00000369016.8/2029, intron 4 of 4)	1	150624622	150629116	4495	2	2029	ENST00000513281.5	19857	ENSG00000143420	ENSA	endosulfine alpha	0.329114	0.603103	21.7753	0.389207	0.704072	-21.5737	0.484642	0.84435	20.8118	0.210736	0.682531	-21.5737	0.167938	0.681513	21.7753	0.523999	0.781216	-20.7049
chr1	150609385	150609536	152	chr1:150609385-150609536	1	TCCTTCCAGTTCTTTTTCAATTGATCTGTGCTTTTTAACCCATAAAAATAGGATAGATAGTAGTATCTGTCTCACAGGAAAAGAACAGAAGTGAAATGCAAAGTGGGTAATGTTTTCCTTTTTCTCGTTCCTAAGAGCTGAGACCTACTGCA	Intron (ENST00000369016.8/2029, intron 4 of 4)	1	150624622	150629116	4495	2	2029	ENST00000513281.5	19580	ENSG00000143420	ENSA	endosulfine alpha	0.329114	0.603103	21.7753	0.389207	0.704072	-21.5737	0.484642	0.84435	20.8118	0.210736	0.682531	-21.5737	0.167938	0.681513	21.7753	0.523999	0.781216	-20.7049
chr1	151059373	151059526	154	chr1:151059373-151059526	11	TCTGCAGCCCAGGACACCCGCCTCCCCCACACCCCGCATCCGGTGTGTCTCCGCCTGGCCCGGCCGGCGCGGCAGGCGGGCCAGGGGACCAACTGCACGGCCTCACCTGCTCTTCTCCACCATCCAGACGTTCAGCTACAGCTGGTGGGGGTGA	Promoter (<=1kb)	1	151052114	151059574	7461	2	56882	ENST00000483763.5	48	ENSG00000197622	CDC42SE1	CDC42 small effector 1	0.329114	0.603103	24.3841	0.292615	0.704072	24.4581	0.306975	0.726107	24.5335	0.27781	0.682531	24.5709	0.649975	0.806744	0.78258	0.596098	0.781216	0.92697
chr1	151059560	151059745	186	chr1:151059560-151059745	23	CCCGGGCTAGCTCTGCGGCGAGGTGGGGGAGCCGAGTACGAGCCGGCAGAGGTGGGGCCGGCTGAGGGCGGAAGCGGCGGCGACGCGATTACGAAACCCGTCCGGCTCGGAGCCCGGCGCACTGCTCCCCTCTGGACTGCGGAGGCACTGCACTGCGCGGGACGTGGGAGGGTGCCTCTGCAGCCC	Promoter (<=1kb)	1	151050973	151059649	8677	2	56882	ENST00000540998.5	0	ENSG00000197622	CDC42SE1	CDC42 small effector 1	0.329114	0.603103	24.3841	0.292615	0.704072	24.4581	0.306975	0.726107	24.5335	0.27781	0.682531	24.5709	0.649975	0.806744	0.78258	0.596098	0.781216	0.92697
chr1	151266060	151266249	190	chr1:151266060-151266249	4	GGCAGCTGCAGCTTCTGCTGCTGAGGCCGGGATTGCTACGACTGGGACTGAAGGTGAAAGAGGTGGAATCCGAAGTCCTGGGACTGCGGGATGCTAAACATTGAAAGCTGGGTGTAGGCACTGCAGGGAGAGTGTGGAGGTCTGACAGGGTAGGAATATGTGGGAGGGCTGGGCTAGGAATGGCCTTGGA	Promoter (<=1kb)	1	151266038	151267460	1423	1	5710	ENST00000427779.5	22	ENSG00000159352	PSMD4	proteasome 26S subunit, non-ATPase 4	NA	NA	0	0.891077	0.951591	0.74436	0.306975	0.726107	23.8704	0.753887	0.879899	-0.25564	0.325495	0.704731	-23.8339	0.561579	0.781216	1.61312
chr1	151266249	151266438	190	chr1:151266249-151266438	2	AGGCTGGCCTGTGTGGATATGGCACCAATTCTACCCTGCTCCTCTTTTCCTTTTCCCAGACTCAGACGATGCCCTGCTGAAGATGACCATCAGCCAGCAAGAGTTTGGCCGCACTGGGCTTCCTGACCTAAGCAGTATGACTGAGGAAGAGCAGATTGCTTATGCCATGCAGATGTCCCTGCAGGGAGCA	Promoter (<=1kb)	1	151266308	151266725	418	1	5710	ENST00000470396.1	0	ENSG00000159352	PSMD4	proteasome 26S subunit, non-ATPase 4	NA	NA	0	0.891077	0.951591	0.881863	0.306975	0.726107	23.9518	0.753887	0.879899	-0.118137	0.325495	0.704731	-23.9153	0.561579	0.781216	1.75062
chr1	151594690	151594911	222	chr1:151594690-151594911	4	GCTGCAGTGGCTCACACCTGTAATCCCAGCACTTTGGGAGGCCGAGGTGGGCGGATCACTTGAGGTCAGGAGTTCAAGACCAGCTTGGGCAACATGGCAAAACCCTGTCTCTACTAAAAATACAAAAAAATTAGCCGGGCATGATGGTGCATGCCTGTAGTCCCAGCTACTTGGGGGGCTGAGGTGGGAGGATCGCTTGAGTCCAGGAGGTTGAGGCTGCAG	Distal Intergenic	1	151612006	151693618	81613	1	81609	ENST00000642376.1	-17095	ENSG00000143376	SNX27	sorting nexin 27	0.329114	0.603103	21.5768	0.123414	0.704072	22.6861	0.306975	0.726107	21.6487	0.27781	0.682531	21.6861	0.649975	0.806744	0.93014	0.0361852	0.781216	22.6861
chr1	151906256	151906405	150	chr1:151906256-151906405	8	CGCAATGAGGGGCTTAGCACCCGGGCCAGTGGCTGCAGAGGGTGTACTGGGTCCCCCAGCAGTGCCGGCCCACTGGCGCTGCGCTCGATTTCTCACTGGGCCTTACCTGCCTTCTGGCGGGGCAGGGCTCGGGACCTGCAGCCTGCCATG	Intron (ENST00000368814.8/117145, intron 1 of 5)	1	151874055	151909502	35448	2	117145	ENST00000471464.5	3097	ENSG00000159445	THEM4	thioesterase superfamily member 4	0.544211	0.803215	1.82617	0.461936	0.75726	2.03142	0.967269	0.999197	0.862698	0.889459	0.940684	1.03142	0.22065	0.681513	2.75578	0.183554	0.781216	2.90017
chr1	151906405	151906554	150	chr1:151906405-151906554	8	GCCTGAGCCTCCCACGCCCTCCGTGGGCTCCTGCACGGCCCGAGCCTCCCTGATGAGTGCTGCCCCCTGCTCCACGGCGCCCAGTCCCATCGAGCACCCAAGGGCTGAGGAGTGTGGGCACACAGCGTGGGACTGGCAGGCAGTTCCACC	Promoter (2-3kb)	1	151874055	151909502	35448	2	117145	ENST00000471464.5	2948	ENSG00000159445	THEM4	thioesterase superfamily member 4	0.544211	0.803215	1.93312	0.461936	0.75726	2.13837	0.967269	0.999197	0.969651	0.889459	0.940684	1.13837	0.22065	0.681513	2.86274	0.183554	0.781216	3.00713
chr1	151906554	151906703	150	chr1:151906554-151906703	2	CTGCAGCCCCAGTGCGAGATCCACTGGGTGAAGCCAGCTGGGCTCCTGAGTCTAGTGGGAACTTGGAGAACCTTTATGTCTAGCTAAAGGACTGTAAATACACCAATCGGCACTCTGTATCTAGCTCAAGGTTTATAAACACACCAATCA	Promoter (2-3kb)	1	151874055	151909502	35448	2	117145	ENST00000471464.5	2799	ENSG00000159445	THEM4	thioesterase superfamily member 4	0.544211	0.803215	1.93312	0.461936	0.75726	2.13837	0.967269	0.999197	0.969651	0.889459	0.940684	1.13837	0.22065	0.681513	2.86274	0.183554	0.781216	3.00713
chr1	153795016	153795167	152	chr1:153795016-153795167	5	CTGCAGGCAGACAGGCAGATGGGCCGGTGGGGGAGGGAGGGGGCGATCCCATTGTCCCCTGGGGAGCACAATGCTCACGCCTCAGCCCCTGACCTCACCATTGTGCCCACCCCGCCCCCTCCCCGTTGCCAGGGCCCAGCTGAAAGAGGCCA	Promoter (1-2kb)	1	153793947	153796302	2356	1	343052	ENST00000633218.1	1069	ENSG00000231827	LOC343052	immunoglobulin superfamily DCC subclass member 3 pseudogene	0.329114	0.603103	25.3629	0.389207	0.704072	-25.1612	0.484642	0.84435	24.3994	0.210736	0.682531	-25.1612	0.167938	0.681513	25.3629	0.523999	0.781216	-24.2925
chr1	153795279	153795431	153	chr1:153795279-153795431	3	GACCCAAAGTCTCCCTAAAGTCAAGTCCTGTCCCTTGCCCCTCGCCAAGGCTGGGAGGGAATCAAAGCCATGGGGGAGGTGGTGGACAAAGGGTGGGCCTCAGGGGGCCGCCGTGTTCAGGCTGTGCTGGCTGTCCCTACAGGCTGTGCTGCA	Promoter (1-2kb)	1	153793947	153796302	2356	1	343052	ENST00000633218.1	1332	ENSG00000231827	LOC343052	immunoglobulin superfamily DCC subclass member 3 pseudogene	0.329114	0.603103	25.3629	0.389207	0.704072	-25.1612	0.484642	0.84435	24.3994	0.210736	0.682531	-25.1612	0.167938	0.681513	25.3629	0.523999	0.781216	-24.2925
chr1	153795431	153795583	153	chr1:153795431-153795583	4	AGGCTCCGAGCTGGCCTTCGTGCAGGAGCTGGGGGACACAGTGGCTGTGTGGGAGCACCCACTGGTGCTGCCCTGCCAGGTGGAGGGTGAGCCGCCTGTGTCCATTTCCTGGCAGCGGGATAGGCTGGCCTTAGCCAATGAGAGTGGTGTCAC	Promoter (1-2kb)	1	153793947	153796302	2356	1	343052	ENST00000633218.1	1484	ENSG00000231827	LOC343052	immunoglobulin superfamily DCC subclass member 3 pseudogene	0.329114	0.603103	25.2754	0.389207	0.704072	-25.0738	0.484642	0.84435	24.3119	0.210736	0.682531	-25.0738	0.167938	0.681513	25.2754	0.523999	0.781216	-24.205
chr1	153858434	153858606	173	chr1:153858434-153858606	4	ATCTCTACAAAAAATAGAAAAATTAGCCCAGGATGGTGGCATGCACCTGCGGTCCCAGCTACCCAGGAGGCTGAGGTGGGAGGATCGCTTGAGCTCAGGAGGTCAAGGCTGCAGTGAGCCGAGATCATGCCATTGCATTCCAGCCTGGGGAACAGAGCGAGACCATGTCTCAT	Intron (ENST00000368655.5/57459, intron 1 of 10)	1	153819677	153827610	7934	2	57459	ENST00000638051.1	-30824	ENSG00000143614	GATAD2B	GATA zinc finger domain containing 2B	0.329114	0.603103	23.488	0.123414	0.704072	24.8965	0.306975	0.726107	23.7728	0.176959	0.682531	24.3783	0.649975	0.806744	0.540012	0.170235	0.781216	2.47882
chr1	154340763	154340922	160	chr1:154340763-154340922	4	CCCCAGGCGGAGGGCCTGCAGCGAAGGCCCATGTGGGTGGGGCACCTCCTCTTCTTCCCGACCCAAGCCTCACCTCTTGTCCCCTGTGCAGTGTGGAGGTCATCCGTCTGGGCCACAGCTACTTCATCAACTGGGATAAGAAGATGTTCTGCATGAAGAA	Exon (ENST00000368489.6/57198, exon 13 of 28)	1	154346615	154349459	2845	1	57198	ENST00000505882.1	-5693	ENSG00000143515	ATP8B2	ATPase phospholipid transporting 8B2	0.329114	0.603103	23.488	0.389207	0.704072	-22.6343	0.306975	0.726107	23.235	0.753887	0.879899	-0.072267	0.614107	0.806744	1.6521	0.350384	0.781216	-23.1281
chr1	154679312	154679480	169	chr1:154679312-154679480	1	AGCACCACTGCACTCCAGCCTGGGTGACAGAGCGAGACCCTGTCTCAAAAAACAAAAAACCACAGATTGCTGGGCCCCACCCCCAGAACTTCTGTGTTGGGAGCAGGCCCCCCAAAATCTGGCCATAAACTGGCCCCAAAACTGGCCATAAACAAAATCTCTGCAGCAC	Distal Intergenic	1	154582107	154628013	45907	2	103	ENST00000649724.1	-51299	ENSG00000160710	ADAR	adenosine deaminase RNA specific	1	1	-1.09461	0.205257	0.704072	-24.8501	0.65379	0.845217	-2.05808	0.070489	0.576841	-24.8501	0.649975	0.806744	-0.165	0.350384	0.781216	-23.9813
chr1	155115484	155115645	162	chr1:155115484-155115645	0	AATGGATTGAGAAGTTGTAAATTAGAGCCTGGGAATAGTGCTTTGAGATAGAGAAGTGGAGAGAGAACATGGGATTGGGATTTAAGGCCCTGGAATTGTCATGTGTGAGGATGAAGAACTGGCTTGCAAATGCAATGCCTGCAGGGAGGCCAAGTGTATTTG	Distal Intergenic	1	155127876	155134857	6982	1	1942	ENST00000368406.2	-12231	ENSG00000169242	EFNA1	ephrin A1	1	1	-0.104002	0.650754	0.941196	-4.24441	1	1	-0.939488	0.283631	0.682531	-5.24441	1	1	0.711633	0.983422	0.987893	-3.37566
chr1	155115645	155115806	162	chr1:155115645-155115806	3	GTCAGGGAGGCAAAATATAGTCTTCGACTGCCATCTCATCACCTCAGTCATCCCAGAAGAAAGAGAACAGCTCTATAGGCCGGGTATGGTGGCTCACACCTGTAATCCCAGTACACTGGGAGGCTGAGACAGGTGGATCACTTAAGGTCAGGAGTTCGAGAC	Distal Intergenic	1	155127876	155134857	6982	1	1942	ENST00000368406.2	-12070	ENSG00000169242	EFNA1	ephrin A1	1	1	-0.104002	0.650754	0.941196	-4.24441	1	1	-0.939488	0.283631	0.682531	-5.24441	1	1	0.711633	0.983422	0.987893	-3.37566
chr1	155115806	155115967	162	chr1:155115806-155115967	4	CCAGCCTGGCCAACATGAGGAAAACCCGTCTCTACTAAAAATACGAAAATTAGGTGGGTGGTGGTGGCGTGCACCTGCAGTCAAAGCTACTCAAGAGGCTGAGGGAAAGGCTCACTTGAACCAGGAGGTCGAGGCTGTAGTGAGCTATGATGGTGCCACTGC	Distal Intergenic	1	155127876	155134857	6982	1	1942	ENST00000368406.2	-11909	ENSG00000169242	EFNA1	ephrin A1	1	1	-0.126029	0.650754	0.941196	-3.9931	1	1	-0.937225	0.283631	0.682531	-4.9931	1	1	0.669818	0.983422	0.987893	-3.12434
chr1	155388795	155388946	152	chr1:155388795-155388946	2	CTGCAGCCTCGATCTCCTGGGCTCAAGTGATCCTCCTGCCTCAGCCTCCTGAGTAGGCATGTACCACCGCACCCAGCAAATGTTGTTATTGCTTTATAGAGAGAGGTTCTCACTACATTGCCTAAGTTGGTCTCAAACTCCTGGCCTCAAGC	Intron (ENST00000368346.7/55870, intron 7 of 27)	1	155370147	155370868	722	2	55870	ENST00000477427.1	-17927	ENSG00000116539	ASH1L	ASH1 like histone lysine methyltransferase	0.581934	0.813605	1.05539	0.940679	0.951591	-0.00676432	0.917018	0.999197	0.374582	0.919719	0.940684	-0.269599	0.335123	0.719166	1.47059	0.915997	0.986213	0.23127
chr1	155591029	155591185	157	chr1:155591029-155591185	4	CCTGCAGGTCCTGTGGCAGCGCCAGCAGTGAGTCGTACACCTTGCACTGCATCTGGCTAGTGCTCTGCACCACTCAGGACATCCACAGGCCCTCCCACACCACCTGGCCACCACGATGCTGTTGCCGATGAAAGTGGTCACTTTCCACATGGGCAGG	Exon (ENST00000427475.1/ENST00000427475.1, exon 1 of 1)	1	155610205	155612316	2112	1	55154	ENST00000488901.5	-19020	ENSG00000125459	MSTO1	misato mitochondrial distribution and morphology regulator 1	0.152084	0.603103	25.7542	0.891077	0.951591	0.314128	0.306975	0.726107	24.7907	0.753887	0.879899	-0.685872	0.0464076	0.476039	25.7542	0.561579	0.781216	1.18288
chr1	155591235	155591387	153	chr1:155591235-155591387	4	CCAGGATCTGCATTCTGGCAGAGGCCATGGTGAGATTGAAGGAGCTGCACTGCGAAGGAGATATGCGAAATTCCTAGGCCAAGTCGACACTTAATATTAACCATCACGGTGATCTTCTAGATTGGCCCACAAATGCTGTTTCAGAAACTGCAG	Exon (ENST00000427475.1/ENST00000427475.1, exon 1 of 1)	1	155610205	155612316	2112	1	55154	ENST00000488901.5	-18818	ENSG00000125459	MSTO1	misato mitochondrial distribution and morphology regulator 1	0.152084	0.603103	25.7542	0.891077	0.951591	0.314128	0.306975	0.726107	24.7907	0.753887	0.879899	-0.685872	0.0464076	0.476039	25.7542	0.561579	0.781216	1.18288
chr1	155712207	155712354	148	chr1:155712207-155712354	0	AGGATGTTCATTCTGGAACTGTACAGAGGCAATTGTACAGATGGTTGTTTTCTCTGGAAACAACAGTCTACTTGAGTGATAACATATATAAAACTTTAAGAACTAAAGATTCCATTTTGCTGTAGGCCAGGCATGGTGGCTTACACCT	Promoter (2-3kb)	1	155709801	155721876	12076	1	7818	ENST00000608852.1	2406	ENSG00000132676	DAP3	death associated protein 3	0.152084	0.603103	24.4896	0.945411	0.951591	-0.336851	0.136921	0.726107	24.3216	0.61507	0.879899	0.179447	0.479486	0.806744	1.44277	0.785469	0.928082	-0.616662
chr1	155970076	155970226	151	chr1:155970076-155970226	1	CTGCAGTCTAACTTTTATCCCTCTCATACTACTTTCCAGAGTTAAAACCTAGGAGAGTTTCCTCTATTGCTCCTTACCCAACTGGTCTCTCCCATCCTAGGAAGTCCTTTCTGACATCTACCCTCCATCCTTCAGTGTTGATCTCCGCAGA	Promoter (<=1kb)	1	155965324	155969729	4406	2	9181	ENST00000609707.1	-347	ENSG00000116584	ARHGEF2	Rho/Rac guanine nucleotide exchange factor 2	0.408133	0.677839	0.862867	0.242795	0.704072	-2.03818	0.988124	1	-0.100607	0.13807	0.682531	-1.5293	0.0832892	0.659456	1.79248	0.424512	0.781216	-1.62493
chr1	156020345	156020516	172	chr1:156020345-156020516	7	CCCTGCAGCCCTCGAAAAACCGGTACAAGCACCAATATATCTACTGCCCTCTTCCTGTCAGAAGCCCCGGGATGCCCACCGGCTGGTGGAGTCTTCTGAGGGGACACCATGTGGCCAGAGCAGGGCTTCCTTGGGGTGCCTGATTTCGGCCGATCTCGGACCTGCAGGAGCC	Promoter (<=1kb)	1	156009062	156020171	11110	2	6746	ENST00000488179.6	-174	ENSG00000163479	SSR2	signal sequence receptor subunit 2	0.152084	0.603103	24.9736	0.945411	0.951591	-1.40831	0.306975	0.726107	24.0101	0.717538	0.879899	-2.40831	0.0464076	0.476039	24.9736	0.596098	0.781216	-0.539557
chr1	156261822	156261996	175	chr1:156261822-156261996	3	GGAGGCTGCAGTGAGCTGAGACTGTGCCATTGCACTCCAGCCTGGGCAACAAGAATGAAACTCCTTCTCAAAAAAAAAAAAAAAAAAAAAAATAGCCAGGCGTGGTGGCATGCGCTTGTAGCCCCAGCTACTGGGGAGGCTCAGTTGGGAGGATTGCTTGAGCCCAGGAGGTCGA	Intron (ENST00000361813.5/23381, intron 13 of 21)	1	156266137	156267588	1452	2	23381	ENST00000489907.2	5592	ENSG00000198952	SMG5	SMG5 nonsense mediated mRNA decay factor	0.353872	0.603103	-22.4031	0.389207	0.704072	-22.2718	0.184235	0.726107	-22.4031	0.210736	0.682531	-22.2718	0.501742	0.806744	-21.4735	0.523999	0.781216	-21.4031
chr1	156261996	156262170	175	chr1:156261996-156262170	1	AGGCTGCAGTGGAGCTGAGGTATGCCACTGCACTGCAGCCTGGGCAACAGTGAGACCTTGTTTCAAAACAAAACAAAAAAAGCCACATTCGGACTGGCTCATGCCTGTAATCTCAGCACTTTGGGAGGCTGAGGCAGGCAGATCACTTGAGGTCAAGAGTTCCAGACCAGCCTGG	Intron (ENST00000361813.5/23381, intron 13 of 21)	1	156266137	156267588	1452	2	23381	ENST00000489907.2	5418	ENSG00000198952	SMG5	SMG5 nonsense mediated mRNA decay factor	0.353872	0.603103	-22.4031	0.389207	0.704072	-22.2718	0.184235	0.726107	-22.4031	0.210736	0.682531	-22.2718	0.501742	0.806744	-21.4735	0.523999	0.781216	-21.4031
chr1	156464971	156465121	151	chr1:156464971-156465121	4	TATTCACCCATTCAGCATTTATTGAGTGCCTACTATGTGCCAGGCACTGGGCGAGGCTCTGGGGACGCATGCATGAACAAGATTACACCCTGGCTTCTTTCAAGCCCTGGATCGAGGCTCATCAGTTTTTGAAACTCCGTCTAGAAGCCTG	3' UTR	1	156404253	156456613	52361	2	10485	ENST00000673141.1	-8358	ENSG00000125462	MIR9-1HG	MIR9-1 host gene	0.353872	0.603103	-24.1018	0.292615	0.704072	24.1215	0.184235	0.726107	-24.1018	0.27781	0.682531	24.1852	0.501742	0.806744	-23.1722	0.596098	0.781216	1.01966
chr1	156465121	156465271	151	chr1:156465121-156465271	3	GCAGGAGAGGTGGGAAGGCTGGACGTGCTGTCCCCACCCAGTCAGCGGATTGGGGTTAAGAGTGAGTAAGTGATCACTGCTCAGCTGAGGGAGAAGCTTCACGGAGGAAGAGGGACTTGAGTTTTGCTCTGAAAGCAGGTCTGGGGTTGGG	3' UTR	1	156404253	156456613	52361	2	10485	ENST00000673141.1	-8508	ENSG00000125462	MIR9-1HG	MIR9-1 host gene	0.353872	0.603103	-24.3649	0.292615	0.704072	24.1215	0.184235	0.726107	-24.3649	0.27781	0.682531	24.3284	0.501742	0.806744	-23.4353	0.596098	0.781216	0.756627
chr1	156465271	156465421	151	chr1:156465271-156465421	0	GGGAAGAGGGTACTCCAGGAACTGTGTCAAGTGTGGGTGACTAAGTGGACATATGTGGGTGGAAGCAGAGGTCCCTGGAGGGAGAGACCTTGGCAGAGGTAGGGCTGCAGGGAGAAGCACAGAGGGCTAACTGCCAATCCCCCCAACTGCA	3' UTR	1	156404253	156456613	52361	2	10485	ENST00000673141.1	-8658	ENSG00000125462	MIR9-1HG	MIR9-1 host gene	0.353872	0.603103	-24.3649	0.292615	0.704072	24.1215	0.184235	0.726107	-24.3649	0.27781	0.682531	24.3284	0.501742	0.806744	-23.4353	0.596098	0.781216	0.756627
chr1	156532961	156533108	148	chr1:156532961-156533108	4	AGAGGCTGGCATCACCCACCTCAGAAGCAGGCTACGGGTGTTGGAGTCATCAGCATCTGCCTCTAGTCCTTCAAACTTGTTGGTCAGCGTCAGGGACACTTCTAGCTTGCTCAGGTCCGTGTGCCCATCTGCAGCGATGCTCTCACCT	Exon (ENST00000361170.7/128239, exon 32 of 38)	1	156536831	156538861	2031	2	128239	ENST00000476565.1	5753	ENSG00000183856	IQGAP3	IQ motif containing GTPase activating protein 3	0.972134	1	1.81358	0.205257	0.704072	-25.4508	0.690137	0.845217	0.850103	0.070489	0.576841	-25.4508	0.614107	0.806744	2.74319	0.350384	0.781216	-24.5821
chr1	158089170	158089336	167	chr1:158089170-158089336	3	TTCAGAGTAAAACGTCCTATGTCATTTGGCAATGAAAACACTAGAACAGATCATCAGAAGAGGCTGCGTCCTCCTAAAATGATTGCAGCCTTCACCTGCCCTCTCTGGCCTCCACCCCATCCCTGCCCACACCTGCAGAGATGGTGTGTTTACGTGCCAACCTGTGT	Promoter (2-3kb)	1	158086680	158100262	13583	1	55243	ENST00000368172.1	2490	ENSG00000183853	KIRREL1	kirre like nephrin family adhesion molecule 1	0.329114	0.603103	24.0828	0.205257	0.704072	-25.0898	0.306975	0.726107	24.3279	0.070489	0.576841	-25.0898	0.649975	0.806744	0.609124	0.350384	0.781216	-24.221
chr1	158089336	158089502	167	chr1:158089336-158089502	4	TAGAGTCAGAGCATGGACCAAAATGGACTCGGGAACCCCATTTCCCTTCTGGGAATTCACTTGTGGCCCTTCCTGCTTTCTTTCCGATGCCTCCGATGTGGGGCCCTCATGGACCTAGGGGCCCAGGCCTCCTGGCTCCCCACCCGAGGCTGCTCTCTCTGCCCAGG	Promoter (2-3kb)	1	158086680	158100262	13583	1	55243	ENST00000368172.1	2656	ENSG00000183853	KIRREL1	kirre like nephrin family adhesion molecule 1	0.329114	0.603103	24.0828	0.205257	0.704072	-25.0898	0.306975	0.726107	24.3279	0.070489	0.576841	-25.0898	0.649975	0.806744	0.609124	0.350384	0.781216	-24.221
chr1	158089526	158089716	191	chr1:158089526-158089716	11	CTGCTGAAGTCGGTGACTCAGGCAGACGCTGGCACCTACACCTGCCGGGCCATCGTGCCTCGAATCGGAGTGGCTGAGCGGGAGGTGCCGCTCTATGTGAACGGTGAGTGAGTGGCCTGAGAGGCAGCCGGGCCTGGGCGGGCTGGTACTGCAGTTTTTAACTGGTTCTGACTTGTGTCTTCTTGCTTGCA	Promoter (2-3kb)	1	158086680	158100262	13583	1	55243	ENST00000368172.1	2846	ENSG00000183853	KIRREL1	kirre like nephrin family adhesion molecule 1	0.329114	0.603103	24.0828	0.205257	0.704072	-25.0898	0.306975	0.726107	24.3279	0.070489	0.576841	-25.0898	0.649975	0.806744	0.609124	0.350384	0.781216	-24.221
chr1	160084192	160084459	268	chr1:160084192-160084459	28	CCTGCAGTGGCGCCTCAGCCTGTTGTTCTTCGTCCTGGCCTACGCGCTCACCTGGCTCTTCTTCGGCGCCATCTGGTGGCTGATCGCCTACGGCCGCGGCGACCTGGAGCACCTGGAGGACACCGCGTGGACGCCGTGCGTCAACAACCTCAACGGCTTCGTGGCCGCCTTCCTCTTCTCCATCGAGACCGAGACCACCATCGGCTACGGGCACCGCGTCATCACCGACCAGTGCCCCGAGGGCATCGTGCTGCTGCTGCTGCAGGCC	Promoter (2-3kb)	1	160081538	160090563	9026	1	3765	ENST00000368088.4	2654	ENSG00000162728	KCNJ9	potassium inwardly rectifying channel subfamily J member 9	0.972134	1	0.388583	0.389207	0.704072	-24.7742	0.690137	0.845217	-0.574891	0.717538	0.879899	-1.04256	0.614107	0.806744	1.31819	0.350384	0.781216	-24.7551
chr1	161311927	161312077	151	chr1:161311927-161312077	1	GTGCAGTGGTGCAATGATAGCTCACTGCAGCCTCAACCTCCCAGGCTCAAGCGATCCTCCCACTTCAGCCTCCAGATTAGCTGAGCCACAGGCAGCCACCACCATACCCAGCTAATTTTTCAATTTTTTGTAGAGATGAGGATCTCACTGT	Promoter (1-2kb)	1	161305329	161309968	4640	2	4359	ENST00000526189.3	-1959	ENSG00000158887	MPZ	myelin protein zero	NA	NA	0	0.292615	0.704072	22.3056	0.484642	0.84435	21.2681	0.456779	0.828721	21.3056	0.501742	0.806744	-21.2316	0.146673	0.781216	22.3056
chr1	161312077	161312227	151	chr1:161312077-161312227	1	TGTTGCTCAGGTTGATCTTGAACTCCTATACTCAAGTGATCCTTCTGCCTTGGCTTCCCTAAGTACTGGGATTACAGGTGTGAGTCACCGTGCCTGACCTCTAGAAGTTAATGTAAGTGGGGTGGTCATTGTTATTCCTGCTATGAGACCA	Promoter (2-3kb)	1	161305329	161309968	4640	2	4359	ENST00000526189.3	-2109	ENSG00000158887	MPZ	myelin protein zero	NA	NA	0	0.292615	0.704072	22.3056	0.484642	0.84435	21.2681	0.456779	0.828721	21.3056	0.501742	0.806744	-21.2316	0.146673	0.781216	22.3056
chr1	161312227	161312377	151	chr1:161312227-161312377	0	ACTGCAGGCTCACCCAGGTGAAGGACAGTGTCCTGGTACCTTCCTGGCATCTCATTAGACCACAGCCCTGGTGGGTATGGTCATTAGTATTAGATTTGGGTTGTGGAATTCTAAATATGGGATTGCTTATGAAGTCCATAGGCAAAACCAT	Promoter (2-3kb)	1	161314381	161328495	14115	1	6391	ENST00000515731.1	-2004	ENSG00000143252	SDHC	succinate dehydrogenase complex subunit C	NA	NA	0	0.292615	0.704072	22.3056	0.484642	0.84435	21.2681	0.456779	0.828721	21.3056	0.501742	0.806744	-21.2316	0.146673	0.781216	22.3056
chr1	161727390	161727687	298	chr1:161727390-161727687	23	ACCGGGCTGCAGTTCCCGGCGAGCGGCGCCCCGACTGCGGGGCCACCCGCCTGCGCTCCGCCGACGCCCTTGGAACAATCGGCTGGAGCCCTGAAACCCGACGTGGACCTTCTGCTCCGAGAAATGCAGCTGCTCAAAGGCCTTCTGAGCCGGGTGGTCCTGGAATTAAAGGAGCCACAGGCCCTCCGGGAGCTCAGGGGAACGCCCGAGACCCCCACCTCTCACTTTGCTGTGAGCCCGGGAACCCCAGAGACCACTCCTGTGGAGAGCTGAGGGGGCGGCTACCGTCCCCTCTGCA	Promoter (1-2kb)	1	161725901	161728142	2242	1	127943	ENST00000495397.1	1489	ENSG00000162746	FCRLB	Fc receptor like B	0.544211	0.803215	0.885653	0.650754	0.941196	-1.52491	0.967269	0.999197	-0.0778214	0.283631	0.682531	-2.52491	0.22065	0.681513	1.81526	0.983422	0.987893	-0.656152
chr1	162047326	162047468	143	chr1:162047326-162047468	1	GTTCCAGATGATCCCCAAATATCCTTTTTATTGCTCTTCCTTTTAAAAATGAAACAGAAGCTCAGAAATGTGAACTAATGTTTCGAGGTGGCATAACTACTAAACAGCAGAACCATAATTTGAATTTAGGTATTTTGGCTGCA	Distal Intergenic	1	162069691	162370475	300785	1	9722	ENST00000361897.10	-22223	ENSG00000198929	NOS1AP	nitric oxide synthase 1 adaptor protein	0.353872	0.603103	-24.1401	0.945411	0.951591	-0.118259	0.65379	0.845217	-1.28698	0.717538	0.879899	-1.11826	0.325495	0.704731	-24.0269	0.596098	0.781216	0.750497
chr1	163645246	163645390	145	chr1:163645246-163645390	2	CAGCTGCAGGTCTGTTGGAATACCCTGCCGTGTGAGGTGTCAGTGTGCCCCTGCTGGGGGGTGCCTCCCAGTTAGGCTGCTCGGGGGTCAGGGATCAGGGACCCACTTGAGGAGGCAGTCTGCCCATTCTCAGATCTCCAGCTGC	Distal Intergenic	1	163340255	163343815	3561	1	83540	ENST00000531529.1	304991	ENSG00000143228	NUF2	NUF2 component of NDC80 kinetochore complex	1	1	-0.176501	0.123414	0.704072	22.751	0.65379	0.845217	-1.13998	0.176959	0.682531	22.6352	0.649975	0.806744	0.753109	0.197631	0.781216	1.38611
chr1	163645390	163645534	145	chr1:163645390-163645534	1	CGTGCTGGGAGAACCACTGCTCTCTTCAAAGCTGTCAGACAGGGACATTTAAGTCTGCAGAGGTTACTGCTGTCTTTTTGTTTGTCTGTGCCCTGCCCCCAGAGGTGGAGCCTACAGAGGCAGGCAGGCCTCCTTGAGCTGTGGT	Distal Intergenic	1	163340255	163343815	3561	1	83540	ENST00000531529.1	305135	ENSG00000143228	NUF2	NUF2 component of NDC80 kinetochore complex	0.583211	0.813605	0.231925	0.0543496	0.704072	23.0534	1	1	-0.731549	0.114587	0.682531	22.8068	0.236697	0.690204	1.16154	0.0616093	0.781216	1.68855
chr1	164459716	164459858	143	chr1:164459716-164459858	0	AGCTCAAGGAGGCCTGCCTGCCTCTGTAGGCTCCACCTTTGGGGGCAGGGCACAGACAAACAAAAAGACAGCAGTAACCTCTGCAGACTTAAATGTCCCTGTCTGACAGCTTTGAAGAGAGCAGTGGTTCTCCCAGCATGCAG	Distal Intergenic	1	164555584	164564015	8432	1	5087	ENST00000467023.5	-95726	ENSG00000185630	PBX1	PBX homeobox 1	0.353872	0.603103	-21.7489	0.891077	0.951591	2.23445	0.690137	0.845217	1.06574	0.753887	0.879899	1.23446	0.325495	0.704731	-23.1083	0.561579	0.781216	3.10321
chr1	164459858	164460000	143	chr1:164459858-164460000	1	GCTGGAGATCTGAGAACAGGCAGACTGCCTCCTCAAGTGGGTCCCTGACCCCTGACCCCCAAGCAGCCTAACTGGGAGGCACCCCCCAGCAGGGGCACACCGACATCTCACACAGCAAGGTATTCCAACAGACCTGCAGCTGA	Distal Intergenic	1	164555584	164564015	8432	1	5087	ENST00000467023.5	-95584	ENSG00000185630	PBX1	PBX homeobox 1	0.353872	0.603103	-21.7489	0.891077	0.951591	2.23445	0.690137	0.845217	1.06574	0.753887	0.879899	1.23446	0.325495	0.704731	-23.1083	0.561579	0.781216	3.10321
chr1	165207863	165208017	155	chr1:165207863-165208017	1	GCCTGCAGCTCAGGAGCCCTCAACCCTCTCACAAGTTCCTCGTGGCTCAGTCTTCCCTTGAAGGCCTTATTTCTCCAGTGGGTGTGGTCTAGGCTTCACTGAGTCCAGATATGTCATCCAAAGAGCTGGGTAGTGGGAGGCCTCTGGTAGGAACA	Promoter (2-3kb)	1	165210627	165213090	2464	1	105371561	ENST00000457106.1	-2610	NA	LMX1A-AS2	LMX1A antisense RNA 2	NA	NA	0	0.389207	0.704072	-22.3124	0.306975	0.726107	22.682	0.753887	0.879899	-0.472319	0.325495	0.704731	-22.6455	0.350384	0.781216	-22.5751
chr1	165356402	165356555	154	chr1:165356402-165356555	21	GAGCGCTGCTGGAAGCTTCTGCCCGGGAAGGCGTCGCCCCCGAGACTGCAGCCGGAGGAGCCGCCCTCGGCTTCGGAGCGCCGGGGAGGGAGCCGGAGCGAACGCCGGCCGCTGGCTCTGCTCCTCGGCGCGCCCAGGCTGGGCCGGGACGTGG	Promoter (<=1kb)	1	165201867	165356715	154849	2	4009	ENST00000342310.7	160	ENSG00000162761	LMX1A	LIM homeobox transcription factor 1 alpha	0.972134	1	0.24652	0.292615	0.704072	23.6355	0.690137	0.845217	-0.716954	0.27781	0.682531	23.7262	0.614107	0.806744	1.17613	0.596098	0.781216	0.968259
chr1	165356555	165356708	154	chr1:165356555-165356708	14	GTCGCGAGCTGCCGGCCTTCCCGGGACGTCCTACCAGCCCGCGTCGCTCCTCAGCGGGAGGAGAGGGCCAGTTGCTTCTCCAAGGCTAGGAGGGAAGGCAGAGGCCCAGGGTCCTGGGTGCGAGTCGGCCCTGCTTCGCCGGGGCGGATCCTGC	Promoter (<=1kb)	1	165201867	165356715	154849	2	4009	ENST00000342310.7	7	ENSG00000162761	LMX1A	LIM homeobox transcription factor 1 alpha	0.972134	1	0.509554	0.292615	0.704072	23.6355	0.690137	0.845217	-0.45392	0.27781	0.682531	23.8717	0.614107	0.806744	1.43916	0.596098	0.781216	0.705225
chr1	165424791	165424933	143	chr1:165424791-165424933	3	ATCCCTCTCAGACCAGTCCTGGGTGAGGAAGGCAGGATGCATAGGAATAATCTGCCCAGACGATCCAGAGTCCAGCTCACTGTAGCTAACACCAAGGCCTTTTTTCCAGTGTCATCTCGTTAACCGAGCAAAGCATTGCTGCA	Promoter (<=1kb)	1	165410750	165424972	14223	2	6258	ENST00000470566.1	39	ENSG00000143171	RXRG	retinoid X receptor gamma	0.0733743	0.603103	26.0738	0.0628259	0.704072	-25.8121	0.0927196	0.726107	25.4621	0.0452952	0.576841	-2.32247	0.164438	0.681513	2.85687	0.123911	0.781216	-25.3551
chr1	165761472	165761625	154	chr1:165761472-165761625	3	CTGCAGTGAGCTGTGTTCACTTCACTGCACTCCAGCCTATGCGAGAGCGAGACCCTGTCGCCAAAATAAAATAAAACAAAACATCATGTACATGGAAAGAGAGAGAGAAAGATTTTGAATGAACATACTAGTGAGAGATCATAAAAGAAAAATG	Intron (ENST00000612311.4/54499, intron 2 of 6)	1	165743169	165768837	25669	2	54499	ENST00000481278.5	7212	ENSG00000143183	TMCO1	transmembrane and coiled-coil domains 1	0.485485	0.782886	0.426936	0.422501	0.73461	-0.932561	0.967485	0.999308	-0.137508	0.157458	0.682531	-1.11185	0.204703	0.681513	0.862951	0.880003	0.986213	-0.477025
chr1	165830992	165831173	182	chr1:165830992-165831173	3	CTGCAGGTCTAGAGGCTGAGGTGGGAGGAATGCTTGAGTATGGGAGGTCGAGGCTGCAGTGAGCTGTGATTGTGCCACTACACTCCAGCCTGGGTGACAGAGCAAGACCTGTCTCGAACAAAAACCAAAAAAGGTTATGGCTGAGTACGGTGGCTCACACCTCTAGTCCCAGCACTTTGGGA	Intron (ENST00000367879.9/7371, intron 1 of 6)	1	165827805	165911608	83804	1	7371	ENST00000642653.1	3187	ENSG00000143179	UCK2	uridine-cytidine kinase 2	0.353872	0.603103	-21.6084	NA	NA	0	0.184235	0.726107	-21.6084	0.456779	0.828721	20.7528	0.501742	0.806744	-20.6788	0.523999	0.781216	-20.6084
chr1	165831173	165831354	182	chr1:165831173-165831354	2	AGGCCAAGGAAGGAGGATGCCTTCAAAACCAGCCTGGGCAACAGAGAGAGACCCCGTCTCTACGAAAAATTAAAAATTAGCCATGTATGTGCCACCAGCTTCTCAGGAGGCTGAGGCAGGAGGATGGCTTGAGCCTAGGACTTGGAGGCTGCAGTGAGCTTTGATGGTGCCACTGTACTCCA	Intron (ENST00000367879.9/7371, intron 1 of 6)	1	165827805	165911608	83804	1	7371	ENST00000642653.1	3368	ENSG00000143179	UCK2	uridine-cytidine kinase 2	0.353872	0.603103	-21.6084	NA	NA	0	0.184235	0.726107	-21.6084	0.456779	0.828721	20.7528	0.501742	0.806744	-20.6788	0.523999	0.781216	-20.6084
chr1	167788925	167788981	57	chr1:167788925-167788981	1	TAGCCTTGAACTCTTGGGCTCAAGTGATTCTCCCTCCTCAGCCTCCCGAGTAGCTGG	Promoter (1-2kb)	1	167787067	167788154	1088	1	9019	ENST00000498279.1	1858	ENSG00000197965	MPZL1	myelin protein zero like 1	0.173089	0.603103	-23.8321	0.205257	0.704072	-23.7009	0.250573	0.726107	-2.53869	0.301844	0.682531	-2.36997	0.22065	0.681513	-23.3026	0.244564	0.781216	-23.2323
chr1	167789002	167789153	152	chr1:167789002-167789153	1	CTGCAGCTGGCAAGAATCACCTTCTTTATAAAGCGTCAGTCATGCTTCCAGCAAGAGGCAGCATCAGTCATGGCTTTATAACAGCTTCATGGTGCCTCAAAGACTGTTGAGGTTAATGAGAGCCTAGATTAGACAGTTTGGCTGTCCTTCCC	Promoter (1-2kb)	1	167787067	167788154	1088	1	9019	ENST00000498279.1	1935	ENSG00000197965	MPZL1	myelin protein zero like 1	0.173089	0.603103	-23.8321	0.205257	0.704072	-23.7009	0.250573	0.726107	-2.53869	0.301844	0.682531	-2.36997	0.22065	0.681513	-23.3026	0.244564	0.781216	-23.2323
chr1	167855568	167855756	189	chr1:167855568-167855756	1	CTGCAGGTTAAAGTGAGTATACCCATACCCCCCATGATGAAAGGGAAATAGAGCTTTTCACTAAGCAAAGTTTAAGAAGGCGTAACAGGGAGGCAACATGGAAAAGGTGAGCAACATCCATCCTACCAAGCATTATGAATGGCTCCTTCAAAAGGTGGACCAGACCAAGCATGGTGGCTCACACCTGTA	Intron (ENST00000367851.9/55811, intron 17 of 32)	1	167809646	167848489	38844	2	55811	ENST00000485964.5	-7079	ENSG00000143199	ADCY10	adenylate cyclase 10	NA	NA	0	0.292615	0.704072	21.7653	0.306975	0.726107	22.3822	0.27781	0.682531	22.4197	0.325495	0.704731	-22.3457	0.596098	0.781216	0.0414892
chr1	167855756	167855944	189	chr1:167855756-167855944	1	AATCCCAGCATTTTGGGAGGCTGAGATGGGAGGATTGCTTGAGCCCAGGAGTTCATGATCAGCCTGGGCAACACTGTGAGACCCCATCTCTACAGAAATAAAAAATTTACCGGAGGTGCACACCTGTAGTTCTGGTACTCAGAAAGCTGAGGCAGGAGGATGGCTTGAGCCCAGGAGGTCAAGGCTGCA	Intron (ENST00000367851.9/55811, intron 17 of 32)	1	167809646	167848489	38844	2	55811	ENST00000485964.5	-7267	ENSG00000143199	ADCY10	adenylate cyclase 10	NA	NA	0	0.123414	0.704072	22.3624	0.136921	0.726107	22.6893	0.114587	0.682531	22.7267	0.152032	0.681513	-22.6527	0.414159	0.781216	0.489356
chr1	167888703	167888841	139	chr1:167888703-167888841	10	CGTCTCTATTAAAAACACAAAAAATTAGCGGGGCGTGGTGGCGGGCGCCTGTGGTCCCAGCTACTCAGGAGGCTGAGGCAGGAGAATAGAGTGAACCCGGGAGGCGGAGCGTGCAGTGAGCCGAGACAGCGCAACTGCA	Intron (ENST00000367851.9/55811, intron 8 of 32)	1	167904610	167914089	9480	2	55811	ENST00000476818.2	25248	ENSG00000143199	ADCY10	adenylate cyclase 10	0.329114	0.603103	20.5858	0.123414	0.704072	24.6992	0.306975	0.726107	23.6617	0.27781	0.682531	23.6992	0.649975	0.806744	-2.94889	0.0361852	0.781216	24.6992
chr1	167972076	167972228	153	chr1:167972076-167972228	1	GAACTCCTGACTTCAGGTGATCCAGCTGCCTTGGCCTCCCAAAGTGCTGAGATTACAAGGCATGAGCCGCCATGCCTGGCCCAGCTATCAAAAATTATAACTTCCCAAGTACACATAAATATTTTTAATCAGCCTTATTGCTGTTTATCTGCA	Intron (ENST00000450548.5/55827, intron 3 of 4)	1	167968490	167991339	22850	1	55827	ENST00000491067.1	3586	ENSG00000143164	DCAF6	DDB1 and CUL4 associated factor 6	1	1	-0.0482399	0.650754	0.941196	-1.09308	0.964384	0.999197	-0.059033	0.919719	0.940684	-0.245202	0.987984	1	-0.0151898	0.442201	0.781216	-1.22914
chr1	169463017	169463256	240	chr1:169463017-169463256	11	AGTGGCTCATGCCTGTAATCCCAGCACTTTGGGAGGCCGAGGCGGGCGGATCACGAGGTCAGGAGATCGAGACCATCCTGGCTAACACCGTGAAACCCCATCTCTACTAAAAATACAAAACATTAGCCGGGCGTGGTGGCAGGTGCCTGTAGTCCCAGCTACTCGGGAAGCTGAGGCAGGAGAATGGCGTGAACCCAGGAGGCAGAGTTTGCAGTGAGCCGAGATTGCCACTGCACTGCA	Promoter (2-3kb)	1	169395047	169460669	65623	2	57821	ENST00000545005.5	-2348	ENSG00000117477	CCDC181	coiled-coil domain containing 181	0.644036	0.849049	0.12617	0.389207	0.704072	-24.0462	0.267894	0.726107	-0.837304	0.920918	0.940684	-0.780146	0.983438	1	1.05578	0.244564	0.781216	-24.1498
chr1	169612310	169612468	159	chr1:169612310-169612468	1	AGCTGCAGCTAGACTGATGCTGGAATGCTTTTGCAGAATGAAGGCAGGTCATGTTTCCTCGTTCAGGAATCTTCAGGGGTGGGCACTGGGCAGCTAAAACCAACCACAGAATAATAGTGTGAGTCCTTGGACAAATTTTGTCCATCACCTTGGAAGCCT	Exon (ENST00000426706.6/6403, exon 5 of 15)	1	169588849	169619219	30371	2	6403	ENST00000426706.6	6751	ENSG00000174175	SELP	selectin P	0.972134	1	1.17807	0.389207	0.704072	-24.5332	0.690137	0.845217	0.2146	0.717538	0.879899	-1.83205	0.614107	0.806744	2.10768	0.350384	0.781216	-24.2144
chr1	169612468	169612626	159	chr1:169612468-169612626	0	TTCAAATTCTGCAGCAGTCACACCTTCCCAAAGTGGCAGGCAGGTTGATGCACTAGAATGGTTAAATGGTGTTTTCAATAGCTGCTTGGAAAGATCAAACACCCTTGTTTTTCATGTAGAGAAGTTAGGTAAAATTATCAAATTAATAATTCTTAACCC	Intron (ENST00000426706.6/6403, intron 4 of 14)	1	169588849	169619219	30371	2	6403	ENST00000426706.6	6593	ENSG00000174175	SELP	selectin P	0.972134	1	1.17807	0.389207	0.704072	-24.5332	0.690137	0.845217	0.2146	0.717538	0.879899	-1.83205	0.614107	0.806744	2.10768	0.350384	0.781216	-24.2144
chr1	169794352	169794541	190	chr1:169794352-169794541	3	TGGTGTGTGTAAATTCATCCAAGACTTCACTCCAAACATTTAGTCGAGAACAGCAGCCCTAAGTGTATAGAAGTGGGGGTAATTTGGCAATAATTAGTAAAGACTAATTCGGTGGCAGAGCAAACGCAAACTAGGGCACTGCAGTAGTTTGGAGAGACCTGTAGAAATAAGAAGCAACTTTATTGAGAAT	Promoter (<=1kb)	1	169792529	169794689	2161	2	92342	ENST00000303469.6	148	ENSG00000171806	METTL18	methyltransferase like 18	0.152084	0.603103	25.1307	0.891077	0.951591	0.77356	0.306975	0.726107	24.1672	0.753887	0.879899	-0.22644	0.0464076	0.476039	25.1307	0.561579	0.781216	1.64232
chr1	169794541	169794730	190	chr1:169794541-169794730	8	TCTTCTATCTACTGCGCTAGACACTATACCATCTGCCTCAATTTTCACAGTTCTGGCAAGTGGGATCTTTGTTCCCTTTATACAAGATTTACAATTTGGGGGAGAGGCGGGTCACCCAGTCCCGCGGCTAGGAACGCGCCTCTTTCCTCTCCCATCACGCTGCAAGGCTTGGAGTCACTTCCGGCTGCAG	Promoter (<=1kb)	1	169794730	169804386	9657	1	55732	ENST00000472795.5	0	ENSG00000000460	C1orf112	chromosome 1 open reading frame 112	0.152084	0.603103	25.1307	0.891077	0.951591	0.77356	0.306975	0.726107	24.1672	0.753887	0.879899	-0.22644	0.0464076	0.476039	25.1307	0.561579	0.781216	1.64232
chr1	170660157	170660438	282	chr1:170660157-170660438	17	ATCAGTTCTGCAGGGTGTTTGCCTTTGTGATTTGCTTCCTAGGAGACTGTCCCAACGCGTCCCGCAGCCCACCCTGCCTCGAAACTCCCTGCGGTGATGTCGGGGCTAGAGGAATCCAGGGCTTGGTCCCTGCAGCTGAGGCCTACGGGATATCCCAGGAAAGAGCAGCCTCTCCGTAGTGGTGAAGAGTCTCTCAAGCCTTAGCGCTCTGGTGACCTCCGCGGGATTCTGAGAAAAGCACTGCGGAACGGCGGGAGCGGGCCCTGCTGCTTGCTTCGCGCC	Promoter (2-3kb)	1	170662728	170719903	57176	1	5396	ENST00000553786.1	-2290	ENSG00000116132	PRRX1	paired related homeobox 1	0.979795	1	-0.598325	0.371856	0.704072	-2.04663	0.484628	0.84435	-1.5618	0.106834	0.682531	-3.04663	0.525687	0.806744	0.331286	0.757708	0.912001	-1.17787
chr1	170660469	170660622	154	chr1:170660469-170660622	7	CCCGACGCAGCTCTTCCCTTTTCCTGAATACCCTGGGACTCTGCTCCCGAGTTCCAGCTCCGAGGACTCAAAGACAGTCTCCGTTCCTCACTCTTCAAAGACCACCTCCTTTTCTAGAGGTGGGCTCCCCGACCTTGCGCTTCTAGAGCTGCAG	Promoter (2-3kb)	1	170662728	170719903	57176	1	5396	ENST00000553786.1	-2106	ENSG00000116132	PRRX1	paired related homeobox 1	0.979795	1	-0.598325	0.371856	0.704072	-2.04663	0.484628	0.84435	-1.5618	0.106834	0.682531	-3.04663	0.525687	0.806744	0.331286	0.757708	0.912001	-1.17787
chr1	171169462	171169613	152	chr1:171169462-171169613	1	CTGCAGCAGGCCTGGGGCTGAGCAAGGCCCAGTTTGGGGCATCGCCAGCCAGACACTTCCAGCTGGCAAAAGTGACAGAATAATCCTGTATCAGCAACACTATTAACTATAGTCCACATGCTGCATATCAGACCTCTAGATTTATTCATCTG	Intron (ENST00000669750.1/105371611, intron 2 of 4)	1	171154191	171161568	7378	1	388714	ENST00000633725.1	15271	ENSG00000117507	FMO6P	flavin containing dimethylaniline monoxygenase 6, pseudogene	0.0733743	0.603103	26.4905	0.940679	0.951591	-1.7344	0.136921	0.726107	25.5543	0.567181	0.879899	-2.7344	0.064398	0.578892	6.71243	0.456871	0.781216	-0.865642
chr1	171307130	171307428	299	chr1:171307130-171307428	2	AGGTAGACATGGGGAAGTTTTCAGATGATCCTGATAGGTATTTAGATGTCCTACAGGGTCTAGGGCAAACCTTTGACCTCACTTGGAGAGATGTCATGCTATTGTTAGATCAAACCCTGGCCTTTAATGAAAAGAATGTGGCTTTAGCTGCAGCCTGAGAGTTTGGAGATACCTGGTACCTTAGTCAAGTAAATGATAGAATGACAGCCGAAGAAAGGGACAAATTCCCTACCAGTCAGCAAGCCATCCCCAGTATGGATCCCCACTGGGACCTCGACTCAGATCATGGGGACTGGAGT	Distal Intergenic	1	171314183	171342084	27902	1	2329	ENST00000367749.4	-6755	ENSG00000076258	FMO4	flavin containing dimethylaniline monoxygenase 4	0.353872	0.603103	-21.3211	0.123414	0.704072	22.7289	0.184235	0.726107	-21.3211	0.27781	0.682531	21.7289	0.501742	0.806744	-20.3915	0.0361852	0.781216	22.7289
chr1	171307642	171307793	152	chr1:171307642-171307793	0	CAGCCACAGATATCAGGAGAAAGCTCCAAAAGCAAGCCCTGGGCCCTGAACAAAATCTGGAGGCATTATTAAACCTGGCAACCTTGGTGTTCTATAATAGGGACCAAGAGGAACAGGCCAAAAAGGAAAAGTGAGATCAGAGAAAGGCTGCA	Distal Intergenic	1	171314183	171342084	27902	1	2329	ENST00000367749.4	-6390	ENSG00000076258	FMO4	flavin containing dimethylaniline monoxygenase 4	0.353872	0.603103	-21.3211	0.123414	0.704072	22.7289	0.184235	0.726107	-21.3211	0.27781	0.682531	21.7289	0.501742	0.806744	-20.3915	0.0361852	0.781216	22.7289
chr1	171374144	171374317	174	chr1:171374144-171374317	2	TCTGCAGACTTAAATGTCCCTGTCTGACAGCTTTGAAGAGAGCAGTGGTTCTCCCAGCACGCAGCTGGAGATCTGAGAACGGGCAGACTGCCTCCTCAAGTGGGTCCCTGACCCCTGACCCCTGAGCAGCCTAACTGGGAGGCACCCCCCAGCAGGGGCACACTGACACCTCAC	Distal Intergenic	1	171339299	171339959	661	1	7151	ENST00000649925.1	34845	NA	TOP1P1	DNA topoisomerase I pseudogene 1	0.299107	0.603103	-3.09121	0.236652	0.704072	2.90301	0.636504	0.845217	-0.237033	0.554167	0.879899	2.43988	0.23192	0.690204	-3.4626	0.115078	0.781216	1.85121
chr1	171374317	171374490	174	chr1:171374317-171374490	0	CATGGCAGGGTATTCCAACAGACCTGCAGCTGAGGGTCCTGTCTGTTAGAAGGAAAACTAACAAACAGAAAGGACATCCACACCAAAAACCCATCTGTACATCACCATCATCAAAGACCAAAAGTAGATAAAACCACAAAGATGGGGAAAAAACAGAACAGAAAAACTGGAAAC	Distal Intergenic	1	171339299	171339959	661	1	7151	ENST00000649925.1	35018	NA	TOP1P1	DNA topoisomerase I pseudogene 1	0.299107	0.603103	-3.09121	0.236652	0.704072	2.90301	0.636504	0.845217	-0.237033	0.554167	0.879899	2.43988	0.23192	0.690204	-3.4626	0.115078	0.781216	1.85121
chr1	172986366	172986531	166	chr1:172986366-172986531	2	GAGTTTCCAGTCTTTCTGTTCTGTTTTTTCCCCGTCTGTGTGGTTTTATCTACTTTTGGTCTTTGATGATGGTGATGTACAGATGGGTTTTCGGTGTGGATGTCCTTTCTGTTTGTTAGTTTTCCTTCTAACAGACAGGACCCTCAGCTGCAGGTCTGTTGGAATA	Intron (ENST00000432694.2/ENST00000432694.2, intron 1 of 4)	1	173039202	173050941	11740	2	8995	ENST00000404377.5	64410	ENSG00000120337	TNFSF18	TNF superfamily member 18	0.776176	0.993533	0.593448	0.901792	0.951591	-0.295066	0.355453	0.813327	0.689522	0.538798	0.879899	-0.383201	0.743829	0.869065	0.167982	0.834939	0.958968	-0.0984999
chr1	172986531	172986696	166	chr1:172986531-172986696	4	ACCCTGCCGTGTGAGGTGTCAGTGTGCCCCTGCTGGGGGGTGCCTCCCAGTTAGGCTGCTCGGGGGTCAGGGGTCAGGGACCCACTTGAGGAGGCAGTCTGCCCGTTCTCAGATCTCCAGCTGCGTGCTGGGAGAACCACTGCTCTCTTCAAAGCTGTCAGACAGG	Intron (ENST00000432694.2/ENST00000432694.2, intron 1 of 4)	1	173039202	173050941	11740	2	8995	ENST00000404377.5	64245	ENSG00000120337	TNFSF18	TNF superfamily member 18	0.776176	0.993533	0.593448	0.901792	0.951591	-0.295066	0.355453	0.813327	0.689522	0.538798	0.879899	-0.383201	0.743829	0.869065	0.167982	0.834939	0.958968	-0.0984999
chr1	172986696	172986861	166	chr1:172986696-172986861	1	GGACATTTAAGTCTGCAGAGGTTACTGCTGTCTTTTTGTTTGTCTGTGCCCTGCCCCCCAGAGGTGGAGCCTACAGAGGCAGGCAGGCCTCCTTGAGCTGTGGTGGGCTCCACCCAGTTCGAGCTTCCTGGCTGCTTTGTTTACCTAAGCAAGCCTGGGCAATGGC	Intron (ENST00000432694.2/ENST00000432694.2, intron 1 of 4)	1	173039202	173050941	11740	2	8995	ENST00000404377.5	64080	ENSG00000120337	TNFSF18	TNF superfamily member 18	0.776176	0.993533	0.593448	0.901792	0.951591	-0.295066	0.355453	0.813327	0.689522	0.538798	0.879899	-0.383201	0.743829	0.869065	0.167982	0.834939	0.958968	-0.0984999
chr1	174614524	174614805	282	chr1:174614524-174614805	2	TTCAGCTTTGGTGAATCTGACATTTATGTGGCTTGGAGTTGCTCTTCTTGAGGAGTATCTTTGTGGCATTCTCTGTATTTCCTGAATCTGAATGTTGGCCTGCCTTGCTAGATTGGGGAAGTTCTCCTGAATAACATCCTGCAGAGTGTTTTCCAACTTGGTTCCATTCTCCCCGTCACTTTCAGGTACACCAATCAGACGTAGATTTGGTCTTTTCACATAGTCCCATATTTCTTGGAGGCTTTGCTCATTTCTTTTTATTCTTTTTTCTCTAAACTTCCC	Intron (ENST00000251507.8/9910, intron 13 of 20)	1	174637378	174705750	68373	1	9910	ENST00000474375.6	-22573	ENSG00000152061	RABGAP1L	RAB GTPase activating protein 1 like	0.972134	1	3.27939	0.205257	0.704072	-23.5292	0.690137	0.845217	2.31591	0.070489	0.576841	-23.5292	0.614107	0.806744	4.209	0.350384	0.781216	-22.6604
chr1	175073446	175073591	146	chr1:175073446-175073591	0	TTCCAGAGCTTTTCTGGTGGCTTTTGGTCTTAGAAGAGAATTGCTTTTGTGAAAGCAAGTCCATTTCAGTATTGAGCCTCAGTCTCTCATCCAGGCCACATCTTTTCTTCTTTCTCAGCTCAGACCTGATGCTGGAACCTGCAGAG	Intron (ENST00000239462.9/63923, intron 1 of 18)	1	175077419	175147936	70518	1	63923	ENST00000621086.1	-3828	ENSG00000120332	TNN	tenascin N	0.69655	0.903135	-0.300947	0.39901	0.71143	-1.53432	0.438938	0.84435	-0.696168	0.554971	0.879899	-0.0905394	1	1	0.171143	0.407243	0.781216	-1.84602
chr1	175403381	175403560	180	chr1:175403381-175403560	9	GCAGAGCCCCCGGGAGCTGCAGTCTGTTGGGCACCGGAGTTCGGAACAGTCATCCCCGCTGTACTCGCTGTCACAGATGCACTGGCCATCCACACACACCCCCCGGCTGGAGCAACCCAGCGGGCAGTAGGGCTCCGAGCAATTCTTGCCAAACCAGCCTTCGTTGCAGATGCAGCCACA	Promoter (2-3kb)	1	175391428	175406364	14937	2	7143	ENST00000422274.2	2804	ENSG00000116147	TNR	tenascin R	1	1	-1.83308	0.389207	0.704072	-21.5737	0.65379	0.845217	-2.79655	0.753887	0.879899	1.1791	0.649975	0.806744	-0.903468	0.350384	0.781216	-22.9501
chr1	175403560	175403739	180	chr1:175403560-175403739	1	AGGACTCAAAGCTAAAGTTGCCGTGGCCACTGCAGTGAGGGATATAGTCCAGTTGTCCTGGAATGGTCAAGGAGAAGGTCAAAGAGCAGCAGTGGCCTCTCCTGTCAATGGTGCTGGGGAAGGATGGGCAAAGGCCTCTCTACTCATTCTCTGACCAGATTTCTGTTGCTGAGAGTGAAG	Promoter (2-3kb)	1	175391428	175406364	14937	2	7143	ENST00000422274.2	2625	ENSG00000116147	TNR	tenascin R	1	1	-1.83308	0.389207	0.704072	-21.5737	0.65379	0.845217	-2.79655	0.753887	0.879899	1.1791	0.649975	0.806744	-0.903468	0.350384	0.781216	-22.9501
chr1	175494210	175494379	170	chr1:175494210-175494379	2	GCTGCAGTTCTATGGGCACAGGTGGCACTGGCAGATGCAAGTCCTTTCCATTCATGTGGGTAAACAGTAAACATTATATTAAAATATTCATCACCAGGCCCTCTGTCTGAATGTTAATCTGGGGCGGGAGCTGATTCATAGTCCCCGGCACCAGCTCCTGGGCAAAGCCC	Intron (ENST00000367674.7/7143, intron 2 of 22)	1	175391428	175406364	14937	2	7143	ENST00000422274.2	-87846	ENSG00000116147	TNR	tenascin R	0.152084	0.603103	23.2106	0.891077	0.951591	1.77356	0.136921	0.726107	23.3805	0.567181	0.879899	2.16109	0.502306	0.806744	0.744595	0.813506	0.943903	0.165926
chr1	176261176	176261351	176	chr1:176261176-176261351	2	GAGTTTCCAGTTTTTCTGTTCTGTTTTTTCCCCATCTTTGTGGTTTTATCTACTTTTGGTCTTTGATGATGGTGATGTACAGATGGGTTTTCGGTGTAGATGTCCTTTCTGGTTGTTAGTTTTCCTTCTGACAGACAGGACCCTCAGCTGCAGGTCTGTTGGAATACCCTGCCGTG	Intron (ENST00000701212.1/ENST00000701212.1, intron 4 of 6)	1	175944831	176207286	262456	2	64326	ENST00000367669.8	-53890	ENSG00000143207	COP1	COP1 E3 ubiquitin ligase	0.506009	0.782886	0.231918	0.130019	0.704072	-1.84096	0.564087	0.845217	-0.731556	0.0734148	0.592168	-1.9512	0.0508451	0.505821	1.16153	0.26671	0.781216	-1.23122
chr1	176261351	176261526	176	chr1:176261351-176261526	2	GTGAGGTGTCAGTGTGCCCCTGCTGGGGGGTGCCTCCCAGTTAGGCTGCTCGGGGGTCAGGGGTCAGGGACCCACTTGAGGAGGCAGTCTGCCTGTTCTCAGATCTCCAGCTGCGTGCTGGGAGAACCACTGCTCTCTTCAAAGCTGTCAGACAGGGACACTTAAGTCTGCAGAGG	Intron (ENST00000701212.1/ENST00000701212.1, intron 4 of 6)	1	175944831	176207286	262456	2	64326	ENST00000367669.8	-54065	ENSG00000143207	COP1	COP1 E3 ubiquitin ligase	0.506009	0.782886	0.231918	0.130019	0.704072	-1.84096	0.564087	0.845217	-0.731556	0.0734148	0.592168	-1.9512	0.0508451	0.505821	1.16153	0.26671	0.781216	-1.23122
chr1	176552433	176552575	143	chr1:176552433-176552575	2	TTTCTCTCTCCCCTTTCCCATCTCCTCATCCCCTCTCCTCTCTCTCCTCGCTTTCCTCTTTTCCCTTTCCCTCCCTTTCCCTCTCCGTCCTGGTCCTTGTTTATCTGTAAGCTCCAATTTCTTGCCTTATAGATTTACCTGCA	Promoter (<=1kb)	1	176553488	176555736	2249	1	60676	ENST00000486075.1	-913	ENSG00000116183	PAPPA2	pappalysin 2	0.329114	0.603103	22.7733	0.123414	0.704072	23.6352	0.306975	0.726107	22.5977	0.27781	0.682531	22.6352	0.614107	0.806744	1.46102	0.0361852	0.781216	23.6352
chr1	176915941	176916092	152	chr1:176915941-176916092	1	CTGCAGGGAGGTATTAGAATGTTTTACAAACCCGAAACTTGCCCATTCTCAGTCTTTCACCCATGTCCCTGGTTTATCTCCACCCAAATGGCTTTCAATGGAAAAATCACTGGGATCTTTACTACAGTGAATCTGAAAACTGGAGTTAGAAA	Intron (ENST00000367657.7/460, intron 16 of 22)	1	177029363	177029445	83	2	574441	ENST00000365739.4	113353	ENSG00000202609	MIR488	microRNA 488	0.329114	0.603103	24.6478	0.123414	0.704072	25.3815	0.306975	0.726107	24.344	0.27781	0.682531	24.3815	0.614107	0.806744	1.78658	0.0361852	0.781216	25.3815
chr1	177738080	177738237	158	chr1:177738080-177738237	0	CTGCAGATACCTGAGAACCACAGAAAATAGGTCTAACTTCCAACCCCAGTATGTTGTTAAAAACTACAATGAAGTGGAAGCCAACTACAATCTCTTGTTTAGATTGTGTTCCCCACCCTCAGAGGTAGCAGAGCAGTTCTGTGCAAACTGCTGCAGAT	Intron (ENST00000663166.1/ENST00000663166.1, intron 1 of 4)	1	177700548	177710340	9793	1	101928778	ENST00000670282.1	37532	ENSG00000236720	LINC01741	long intergenic non-protein coding RNA 1741	0.0733743	0.603103	26.8067	0.497092	0.783633	-0.21258	0.203351	0.726107	25.8433	0.920918	0.940684	-1.21258	0.0134976	0.476039	26.8067	0.197631	0.781216	0.656176
chr1	178319880	178320056	177	chr1:178319880-178320056	2	GAGTTTCCAGTTTTTCTGTTCCGTTTTTTCTCCATCTTTGTGGTTTTATCTACTTTTGGTCTTTGATGATGGTGATGTACAGATGGGTTTTCGGTGTGGATGTCCTTTCTGTTTGTTAGTTTTCCTTCTAACAGACAGGACCCTCAGCTGCAGGTCTGTTGGAATACCCTGCCATGT	Intron (ENST00000367649.8/9462, intron 3 of 17)	1	178341471	178484147	142677	1	9462	ENST00000462775.5	-21415	ENSG00000075391	RASAL2	RAS protein activator like 2	0.0884075	0.603103	-22.9798	0.784959	0.951591	2.18199	0.231597	0.726107	-0.441513	0.829008	0.940684	1.3781	0.105385	0.681513	-23.2935	0.821183	0.949834	2.42237
chr1	178320056	178320232	177	chr1:178320056-178320232	3	TGAGGTGTCAGTGTGCCCCTGCTGGGGGGTGCCTCCCAGTTAGGCTGCTCGGGGGTCAGGGGTCAGGGACCCACTTGAGGAGGCAGTCTGCCGGTTCTCAGATCTCCAGCTGCGTGCTGGGAGAACCACTGCTCTCTTCAAAGCTGTCAGACAGGGACATTTAAGTCTGCAGAGGTT	Intron (ENST00000367649.8/9462, intron 3 of 17)	1	178341471	178484147	142677	1	9462	ENST00000462775.5	-21239	ENSG00000075391	RASAL2	RAS protein activator like 2	0.0884075	0.603103	-22.9798	0.784959	0.951591	2.18199	0.231597	0.726107	-0.441513	0.829008	0.940684	1.3781	0.105385	0.681513	-23.2935	0.821183	0.949834	2.42237
chr1	178992682	178992858	177	chr1:178992682-178992858	0	TAGAGTTTCCAGTTTTCTGCTCTGTTTTTTCCCCATCTTTGTGGTTTTATCTACTTTTGGTCTTTGATGATAGTGATGTACAGATGGGTTTTTGGTGTGGATGTCCTTTCTGTTTGTTAGTTTTCCTTCTAAAAGACAGGACCCTCAGCTGCAGGTCTGTTGGAGTACCCAGCCATG	Distal Intergenic	1	179025804	179050316	24513	1	9917	ENST00000440702.5	-32946	ENSG00000116199	FAM20B	FAM20B glycosaminoglycan xylosylkinase	0.644036	0.849049	1.11246	0.292615	0.704072	23.8207	0.267894	0.726107	0.148984	0.176959	0.682531	23.3918	0.983438	1	2.04207	0.917251	0.986213	2.18646
chr1	178992858	178993034	177	chr1:178992858-178993034	2	GTGAGGTGTCAGTGTGCCCCTGCTAGGGGGTGCCTCCCAGTTAGGCTGCTCGGGGGTCAGGGGTCAGGGACCCACTTGAGGAGGCAGTCTGCCCATTCTCAGATCTCCAGCTGCGTGCTGGGAGAACCACTGCTCTCTTCAAAGCTGTCAGACAGGGACATTTAAGTCTGCAGAGAT	Distal Intergenic	1	179025804	179050316	24513	1	9917	ENST00000440702.5	-32770	ENSG00000116199	FAM20B	FAM20B glycosaminoglycan xylosylkinase	0.644036	0.849049	1.26446	0.292615	0.704072	23.9727	0.267894	0.726107	0.300987	0.176959	0.682531	23.4958	0.983438	1	2.19407	0.917251	0.986213	2.33846
chr1	179944987	179945129	143	chr1:179944987-179945129	4	TACTACCCATTCTTTTATTGATGGACATGTTATTTCCTATTTTTGCTATTATAAACGATGCTTCTGTAAAATTCCTTGTACTTGTCTCCTTGTGCACCTGGGTGAGTTTCTTACGGCGGCGAACCATTTAATCCAAGTCTGCA	Distal Intergenic	1	179926641	179941796	15156	2	101928933	ENST00000567486.2	-3191	NA	LOC101928933	uncharacterized LOC101928933	0.329114	0.603103	24.4757	0.389207	0.704072	-24.2741	0.484642	0.84435	23.5123	0.210736	0.682531	-24.2741	0.167938	0.681513	24.4757	0.523999	0.781216	-23.4053
chr1	180422204	180422404	201	chr1:180422204-180422404	5	CTTTTTTCTTTTTTTTTTTTGAGATGGAGTCTCGCTCTTTCACCCAGGCTGCAGTGCAGTGGCATGATTTCGGCTCACTGCAACCTCCACCTCCCGGGTTCAAGCAATTCTCCTGCCTCTGACTTCTGAGCAGCTAGGATTACAAGCGCACACCACCACTCACGGCTAATTTTTGTATTTTTTGCAGAGATGGGGTTTCAA	Intron (ENST00000642319.1/84320, intron 4 of 13)	1	180275380	180430262	154883	2	84320	ENST00000496993.5	7858	ENSG00000230124	ACBD6	acyl-CoA binding domain containing 6	NA	NA	0	0.292615	0.704072	23.7589	NA	NA	0	0.456779	0.828721	22.7589	NA	NA	0	0.146673	0.781216	23.7589
chr1	180422430	180422729	300	chr1:180422430-180422729	4	TCCTGACCTCAGGTGATCCACCCGTCTTGGCCTTCGAAGGTGCTCCCAAGGCCACCCTGTGAGCCACCACACCTGGCCCATCCCTTTTCTTTTTTACAGAAGTCCGTAATGCTCAATTAATTTACCCTGAAATGGCAGACAACCACAGCTGCAGACCTCAATCTACAATACGTATTAAGCAATTCAACTTTTTCTTATAATGTCATGACATTTCTCTGCTTTTTGGGAGTACTTCCAGCATCACTAGTGGTACTTCATATGGGTCTCATGGTGTTATTCAAGGTTTAGAGTATAGTGCTA	Intron (ENST00000642319.1/84320, intron 4 of 13)	1	180275380	180430262	154883	2	84320	ENST00000496993.5	7533	ENSG00000230124	ACBD6	acyl-CoA binding domain containing 6	NA	NA	0	0.292615	0.704072	23.7589	NA	NA	0	0.456779	0.828721	22.7589	NA	NA	0	0.146673	0.781216	23.7589
chr1	180610939	180611093	155	chr1:180610939-180611093	1	ACTGCAGCCTCGACCTCCCAGGCTCAAGCAATCCTCCCACCTCAGCCTCCTGTGTAGCTGGGACTACAGGTGGTCCCACCATGCCCAGCTAATTAAAAAAAAAATTATTTGTAGAGACAGGGTTTCACCATGTTGCCATGGTGGATGTACCCATC	Distal Intergenic	1	180632022	180890279	258258	1	9213	ENST00000367590.9	-20929	ENSG00000143324	XPR1	xenotropic and polytropic retrovirus receptor 1	1	1	-1.43139	0.891077	0.951591	1.61204	0.65379	0.845217	-2.39486	0.858173	0.940684	1.69709	0.649975	0.806744	-0.501777	0.950293	0.986213	0.542732
chr1	180611111	180611264	154	chr1:180611111-180611264	1	GCTCAAGTAATCTGCCTGCGTTGGCCTCCCAAAGTGCTGGGATTTCAGGCATGAGCCATCACCCCCAGCCCCTCCCCTCTTCTTTGAACCAAAGCAACATTTCCTTTCTTCCCCAGCAACAGCAGCAAATATGTGGGTGGCTATTTGGCTGCAG	Distal Intergenic	1	180632022	180890279	258258	1	9213	ENST00000367590.9	-20758	ENSG00000143324	XPR1	xenotropic and polytropic retrovirus receptor 1	0.353872	0.603103	-23.7799	0.292615	0.704072	23.7589	0.184235	0.726107	-23.7799	0.27781	0.682531	23.844	0.501742	0.806744	-22.8503	0.596098	0.781216	0.97902
chr1	180764464	180764697	234	chr1:180764464-180764697	3	TTTTGTTTCTGTTTTTGTTTTTTGAGATGGGGGTCTCACTCTGTCACCCAGGCTGGATTGCAGTAGTGCGATCATGGCTCACTGCAGCCTCGACTTCCTGAGCTCAAGCAATCCTCCCACCTCAGCCTCCCATGTAGCTGGGACTACAGGCATGTACTACCATGCCTGGCTAATGTTTGTATTTTTTGTAGAGGTGGGGTTTTGCCGTGTTGCCCAGGCTGGTCTTAAACTCCT	Intron (ENST00000367590.9/9213, intron 2 of 14)	1	180836652	180874055	37404	1	9213	ENST00000498177.1	-71955	ENSG00000143324	XPR1	xenotropic and polytropic retrovirus receptor 1	0.329114	0.603103	22.2754	0.891077	0.951591	0.31254	0.306975	0.726107	22.3305	0.753887	0.879899	-0.68746	0.649975	0.806744	0.963094	0.561579	0.781216	1.18129
chr1	180764775	180765065	291	chr1:180764775-180765065	10	GATAATTTTTTTTCTTTTTTTTTTTTTTTGAGACAGGGTCTTGCTCTGTCGCCTAGGCTGGAGTGCAGTGGCGCAATCTGGGCTCACTGCAAGCTCCACCTCCCGGGTTCACGCCATTCTCCTGCCTCAGCCTCCTGAGTAGCTGGGACTGCAGGCGCCCACCACCACACCCAGCTAATTTTTTATATTTTTAGTAGAGACGGGGTTTCACTGTTTTAGCCAGGATGGTCTCGATCTCCTGACCTCGTGATCCACCCGCCTTGGCCTCCCAAAGTGCTAGGATTACAGGCG	Intron (ENST00000367590.9/9213, intron 2 of 14)	1	180836652	180874055	37404	1	9213	ENST00000498177.1	-71587	ENSG00000143324	XPR1	xenotropic and polytropic retrovirus receptor 1	0.329114	0.603103	22.2754	0.891077	0.951591	0.31254	0.306975	0.726107	22.3305	0.753887	0.879899	-0.68746	0.649975	0.806744	0.963094	0.561579	0.781216	1.18129
chr1	180871903	180872072	170	chr1:180871903-180872072	1	GAGTTTCCAGTTTTTCTGTTCTGTTTTTTCCCCATCTTTGTGGTTTTATCTACTTTTGGTCTTTGATGATGGTGATGTACAGATGGGTTTTCGGTGTAGATGTCCTTTCTGGTTGTTAGTTTTCCTTCTAACAGACAGGACCCTCAGCTGCAGGTCTGTTGGAATACCCT	Intron (ENST00000367590.9/9213, intron 12 of 14)	1	180863764	180878290	14527	1	9213	ENST00000464817.1	8139	ENSG00000143324	XPR1	xenotropic and polytropic retrovirus receptor 1	0.432592	0.712764	-1.10362	0.500398	0.783633	1.08414	0.191356	0.726107	-1.53133	0.469713	0.847218	0.627004	0.789305	0.898504	-0.436213	0.623342	0.803165	1.10478
chr1	180872072	180872241	170	chr1:180872072-180872241	3	TGCTGTGTGAGGTGTCAGTGTGCCCCTGCTGGGGGGTGCCTCCCAGTTAGGCTGCTCGGGGGTCAGGGGTCAGGGACCCACTTGAGGAGGCAGTCTGCCCGTTCTCAGATCTCCAGCTGCGTGCTGGGAGAACCACTGCTCTCTTCAAAGCTGTCAGACAGGGACACTTA	Intron (ENST00000367590.9/9213, intron 12 of 14)	1	180863764	180878290	14527	1	9213	ENST00000464817.1	8308	ENSG00000143324	XPR1	xenotropic and polytropic retrovirus receptor 1	0.432592	0.712764	-1.10362	0.500398	0.783633	1.08414	0.191356	0.726107	-1.53133	0.469713	0.847218	0.627004	0.789305	0.898504	-0.436213	0.623342	0.803165	1.10478
chr1	180872241	180872410	170	chr1:180872241-180872410	3	AAGTCTGCAGAGGTTACTGCTGTCTTTTTGTTTGTCTGTGCCCTGCCCCCAGAGGTGGAGCCTACAGAGGCAGGCAGGCCTCCTTGAGCTGTGGTGGGCTCCACCCAGTTCGAGCTTCCCAGCTGCTTTGTTTGCCTAAGCAAGCCTGGGCAATGGCGGGCGCCCCTCCC	Intron (ENST00000367590.9/9213, intron 12 of 14)	1	180863764	180878290	14527	1	9213	ENST00000464817.1	8477	ENSG00000143324	XPR1	xenotropic and polytropic retrovirus receptor 1	0.432592	0.712764	-1.10362	0.500398	0.783633	1.08414	0.191356	0.726107	-1.53133	0.469713	0.847218	0.627004	0.789305	0.898504	-0.436213	0.623342	0.803165	1.10478
chr1	180947062	180947211	150	chr1:180947062-180947211	5	ACACTTGAGCAGGGCCGTGGATGGGGCGAGGAAGGGGCCCCATGGGTGTCTGGGGAAGAGCATTCCGGCAGACTGAACAGCAAGTGCGGAGCCCTGGTGGAGGGGCGAGCCTGGCCTGTGAGAACTGTGAGGGTCAGGCTGGACACTGCA	3' UTR	1	180941193	180950925	9733	1	57710	ENST00000461346.1	5869	ENSG00000135835	KIAA1614	KIAA1614	0.175907	0.603103	0.384043	0.519834	0.808822	-1.21893	0.189676	0.726107	0.194485	0.439121	0.828721	-1.00142	0.306873	0.704731	0.401152	0.680722	0.851361	-0.906374
chr1	181427952	181428103	152	chr1:181427952-181428103	0	CTGCAGAGTATTCCTCAGCATGACTGAACCACAGTTTATTCCAGCAACCCTATCAATGGATGTTCCCAGTTGCTTTGCAGTTACCAGCTGTGCTGTAGTAAGCCTCCCCTACATGCCTTTAGGATGTGCACTTTCATTTCTGTAGGGTCAAG	Intron (ENST00000524607.6/777, intron 2 of 11)	1	181483311	181652094	168784	1	777	ENST00000533229.1	-55208	ENSG00000198216	CACNA1E	calcium voltage-gated channel subunit alpha1 E	0.544211	0.803215	1.68832	0.113079	0.704072	-24.7117	0.967269	0.999197	0.724843	0.0248533	0.576841	-24.7117	0.22065	0.681513	2.61793	0.244564	0.781216	-23.8429
chr1	181582272	181582436	165	chr1:181582272-181582436	0	ACTCTGCAGTTCTCACCAGCTGTGGGAGGCAGCAGGAAGGAGGGGAGGGAGGCAAGGTTGATGAGTGCAGTCACTCCTCATTTGAGATGTAAAGGTTGTCTTGAGGCCATGCCACTCAAATTAGCCAGGCACCTCTAGGAATTGCAGCACTGGCCCTGCAGTGGC	Intron (ENST00000524607.6/777, intron 8 of 11)	1	181483763	181656553	172791	1	777	ENST00000700187.1	98509	ENSG00000198216	CACNA1E	calcium voltage-gated channel subunit alpha1 E	0.152084	0.603103	24.3543	0.891077	0.951591	2.59037	0.306975	0.726107	23.3908	0.753887	0.879899	1.59037	0.0464076	0.476039	24.3543	0.561579	0.781216	3.45913
chr1	181986953	181987106	154	chr1:181986953-181987106	2	TGGATTTTTCTTTCCTTTTTTGTTTTCCCTCTCCTCTTCTTGGCCCATTTTCTCACTGTCCCGCTCAGACCCACAGCCAGTCTCGCCAGCAACTGTCTTGTCAGCACATTACATAACTTTGTGTCTTTGTCTTTATCCTGTGCTCACTCTGCAG	Intron (ENST00000671017.1/ENST00000671017.1, intron 1 of 1)	1	182054570	182061712	7143	2	127665	ENST00000339948.3	74606	ENSG00000179930	ZNF648	zinc finger protein 648	0.102436	0.603103	-2.17213	0.901293	0.951591	-0.118422	0.0834108	0.726107	-1.94875	0.48544	0.867492	0.247575	0.193436	0.681513	-1.58708	0.700288	0.866374	-0.387492
chr1	184846186	184846368	183	chr1:184846186-184846368	4	AAAAGACAGCAGTAACCTCTGCAGACTTAAGTGTCCCTGTCTGACAGCTTTGAAGAGAGCAGCGGTTCTCCCAGCACGCAGCTGGAGATCTGAGAACGGGCAGACTGCCTCCTCAAGTGGGTCCCTGACCCCTGACCCCCGAGCAGCCTAACTGGGAGGCACCCCCCAGCAGGGGCACACTGA	Intron (ENST00000367511.4/116496, intron 5 of 13)	1	184794118	184868041	73924	2	116496	ENST00000487074.5	21673	ENSG00000135842	NIBAN1	niban apoptosis regulator 1	0.368046	0.622759	0.374774	0.592871	0.899274	1.8404	0.357242	0.815343	0.898031	0.691632	0.879899	1.12317	0.54449	0.806744	-0.385331	0.613664	0.79348	1.99497
chr1	184846368	184846550	183	chr1:184846368-184846550	2	ACACCTCACACGGCAGGGTATTCCAACAGACCTGCAGCTGAGGGTCCTGTCTGTTAGAAGGAAAACTAACAACCAGAAAGGACATCTACACCGAAAACCCATCTGTACATCACCATCATCAAAGACCAAAAGTAGATAAAACCACAAAGATGGGGAAAAAACAGAACAGAAAAACTGGAAACT	Intron (ENST00000367511.4/116496, intron 5 of 13)	1	184794118	184868041	73924	2	116496	ENST00000487074.5	21491	ENSG00000135842	NIBAN1	niban apoptosis regulator 1	0.368046	0.622759	0.374774	0.592871	0.899274	1.8404	0.357242	0.815343	0.898031	0.691632	0.879899	1.12317	0.54449	0.806744	-0.385331	0.613664	0.79348	1.99497
chr1	185001964	185002134	171	chr1:185001964-185002134	3	GGGAGGGGCGCCCGCCATTGCCCAGGCTTGCTTAGGTAAACAAAGCAGCCGGGAAGCTCCAACTGGGTGGAGCCCACCACAGCTCAAGGAGGCCTGCCTGCCTCTGTAGGCTCCACCTCTGGGGGCAGGGCACAGACAAACAAAAAGACAGCAGTAACCTCTGCAGACTTA	Promoter (2-3kb)	1	184999710	185008789	9080	1	101929069	ENST00000566476.2	2254	NA	LINC01633	long intergenic non-protein coding RNA 1633	1	1	-2.60967	0.0543496	0.704072	24.9449	0.967269	0.999197	0.150425	0.176959	0.682531	23.9449	0.983438	1	-3.21869	0.00939208	0.781216	24.9449
chr1	185002134	185002304	171	chr1:185002134-185002304	2	AAATGTCCCTGTCTGACAGCTTTGAAGAGAGCAGTGGTTCTCCCAGCATGCAGCTGGAGATCTGAGAATGGGCAGACTGCCTCCTCAAGTGGGTCCCTGACCCCTGACCCCCGAGCAGCCTAACTGGGAGGCACCCCCTAGCAGGGGCACACTGACACCTCACACAGCCGG	Promoter (2-3kb)	1	184999710	185008789	9080	1	101929069	ENST00000566476.2	2424	NA	LINC01633	long intergenic non-protein coding RNA 1633	1	1	-2.77959	0.0543496	0.704072	25.0027	0.967269	0.999197	-0.0194997	0.176959	0.682531	24.0027	0.983438	1	-3.27947	0.00939208	0.781216	25.0027
chr1	185002304	185002474	171	chr1:185002304-185002474	0	GGTACTCCAACAGACCTGCAGCTGAGGGTCCTGTCTGTTAGAAGGAAAACTAACAAGCAGAAAGGACATCCACACCAAAAACCCATCTGTACATCACCATCATCAAAGACCAAAAGTAGATGAAACCACAAAGATGGGGAAAAAACAGAGCAGAAAAACTGGAAACTCTAA	Promoter (2-3kb)	1	184999710	185008789	9080	1	101929069	ENST00000566476.2	2594	NA	LINC01633	long intergenic non-protein coding RNA 1633	1	1	-2.77959	0.0543496	0.704072	24.922	0.967269	0.999197	-0.146123	0.176959	0.682531	23.922	0.983438	1	-3.19456	0.00939208	0.781216	24.922
chr1	185070618	185070781	164	chr1:185070618-185070781	6	AGACTGCAGTATTTTCTTTTCTTTTTTTTTTTTTTTTTTGAGACCGAGTCTTGCTGTGTCACCCAGGCTGGAGTGCAGTGGCGCGATCTCAGCTCACTGCAAGTTCCGCCTCCCGGGTTCACACCATTCTCCTGCTTCAGCCTCCCGAGTAGCTGGGACTGCAG	Intron (ENST00000367509.8/6045, intron 1 of 5)	1	185046096	185098344	52249	1	6045	ENST00000453650.2	24522	ENSG00000121481	RNF2	ring finger protein 2	0.173089	0.603103	-22.1844	0.650754	0.941196	-1.86547	0.267894	0.726107	-0.557335	0.283631	0.682531	-2.86547	0.22065	0.681513	-22.4324	0.983422	0.987893	-0.996714
chr1	185070781	185070944	164	chr1:185070781-185070944	12	GGTGCCCGCCACCTCGCCGGCTCATTTTTTTATTTTTAGTAGAGACTGGGTTTCACCGTATTAGCCGGGATGGTCTCGATTTCCTGACCTCGTGATCCGCCCGCCTCGGCCTCCCAAAGTGCTTGGGATTACAGGCGTGAGCCACTGCACCCGGCCAGACTGCA	Intron (ENST00000367509.8/6045, intron 1 of 5)	1	185046096	185098344	52249	1	6045	ENST00000453650.2	24685	ENSG00000121481	RNF2	ring finger protein 2	0.353872	0.603103	-20.9262	0.945411	0.951591	-0.318389	0.690137	0.845217	-0.299061	0.717538	0.879899	-1.31839	0.325495	0.704731	-21.3239	0.596098	0.781216	0.550366
chr1	187073756	187073922	167	chr1:187073756-187073922	13	AAGTGGATCCCGCACGGGGGCTGCAGGTGGAGCTGCCTGCCAGTCCTGCGCCGTGCGCTCGCACTCCTCAGCCCTTGGGTGGCCGATGGGACTGGGCGCCGTGGAGCAGGGGGCGGCGCTCCTCAGGGAGGCTCGGGCTGCACAGGAGCCCACGGAGGCTGGGGGAG	Promoter (<=1kb)	1	187072779	187374445	301667	1	104169671	ENST00000645691.1	977	ENSG00000230426	LINC01036	long intergenic non-protein coding RNA 1036	0.583211	0.813605	-2.71166	0.497092	0.783633	-1.19777	0.693404	0.845217	-0.335194	0.443466	0.828721	-0.507839	0.525687	0.806744	-3.00036	0.694449	0.862197	-1.17846
chr1	187073922	187074088	167	chr1:187073922-187074088	11	GGCTCAGGCATGGCGGGCTGCAGGTCCCGAGCCCTGCCCTGCGGGAAGGCAGCTAAGGCTCGGTGAGAAATCGAGCACAGCGCCGGTGGGCTGGCACTGCTTGGGGACCCAGTACACGCTCCGCAGCCACTGGCCCGGGTGCTAAGTCCCTCACTGCCCGGGGCCAG	Promoter (1-2kb)	1	187072779	187374445	301667	1	104169671	ENST00000645691.1	1143	ENSG00000230426	LINC01036	long intergenic non-protein coding RNA 1036	0.583211	0.813605	-2.71166	0.497092	0.783633	-1.19777	0.693404	0.845217	-0.335194	0.443466	0.828721	-0.507839	0.525687	0.806744	-3.00036	0.694449	0.862197	-1.17846
chr1	191151543	191151746	204	chr1:191151543-191151746	13	TGGGCAGTGAGGGGCTTAGCACCTGGGCCGGCAGCTGCTGTGCTCAATTTCTCGCCAGGCCTTAGCTGCCTTCCCGCGGGGCAGAGCTTGGGACCTGCAGCCCACCATGCCTGAGCCTCCGCCCCCTCCGTGGGCTCCTGTGCCTCCCGAGCCTCCCCGACTAGTGTCGCCCCCTGCTCCACGGCGCCCAGTCCCATCGACGGC	Exon (ENST00000563320.1/ENST00000563320.1, exon 1 of 1)	1	191221159	191228467	7309	2	105371660	ENST00000434983.2	76721	ENSG00000233882	LINC01680	long intergenic non-protein coding RNA 1680	0.152084	0.603103	24.6314	0.389207	0.704072	-24.3457	0.203351	0.726107	24.3556	0.920918	0.940684	-1.224	0.22065	0.681513	1.71153	0.244564	0.781216	-24.2487
chr1	191151746	191151949	204	chr1:191151746-191151949	8	CCCAAGGGCTGAGGAGTGCGGGCGCTCGGCGCGGGACTGTCAGGCAGCTCCACCTGCAGCCCCGGTGCGGGATACACTGGGTGAAGCCAGCTGGGCTCCTGAGTCTGGTGGGGACTTGGAGAACCTTTATGTCTAGCTAAGGGATTGTAAATACACCAATCAGCACCGTGTGTCTAGCTCAGGGTTTGTGAATGCACCTAATGG	Exon (ENST00000563320.1/ENST00000563320.1, exon 1 of 1)	1	191221159	191228467	7309	2	105371660	ENST00000434983.2	76518	ENSG00000233882	LINC01680	long intergenic non-protein coding RNA 1680	0.152084	0.603103	24.6314	0.389207	0.704072	-24.3457	0.203351	0.726107	24.3556	0.920918	0.940684	-1.224	0.22065	0.681513	1.71153	0.244564	0.781216	-24.2487
chr1	192652709	192652851	143	chr1:192652709-192652851	1	TTCACTTTTCAAGAGCCACAGAGAGTCATTTTAAAACAGAAACATGAGGGATCCAAAAGCCCAAATTGACATGTGTTTATTCAGTGCCTGCTATATAGCAAGCAGTGTTGAGGCACGGGGTACATGAAGATGAATAAGCTGCA	Intron (ENST00000543215.5/6003, intron 4 of 5)	1	192644531	192659862	15332	1	6003	ENST00000482095.1	8178	ENSG00000127074	RGS13	regulator of G protein signaling 13	0.0733743	0.603103	24.7614	0.456774	0.75726	-0.729276	0.0628079	0.726107	24.5634	0.554971	0.879899	-0.701079	0.335123	0.719166	1.51463	0.478816	0.781216	-0.462664
chr1	193722954	193723129	176	chr1:193722954-193723129	2	GAGTTTCCAGTTTTTCTGTTCTGTTTTTTCCCCATCTTTGTGGTTTTATCTACTTTTGGTCTTTGATGATGGTGATGTACAGATGGGTTTTCGGTGTAGATGTCCTTTCTGGTTGTTAGTTTTCCTTCTAACAGACAGGACCCTCAGCTGCAGGTCTGTTGGAATACCCTGCCGTG	Intron (ENST00000656143.1/ENST00000656143.1, intron 2 of 5)	1	193349131	193365953	16823	1	101929184	ENST00000660270.1	373823	ENSG00000232077	LINC01031	long intergenic non-protein coding RNA 1031	0.573172	0.813605	0.744101	0.250702	0.704072	-0.877673	0.946339	0.999197	0.400811	0.334511	0.711172	-0.738785	0.376003	0.786777	0.780953	0.231425	0.781216	-0.63228
chr1	193723129	193723304	176	chr1:193723129-193723304	3	GTGAGGTGTCAGTGTGCCCCTGCTGGGGGGTGCCTCCCAGTTAGGCTGCTCGGGGGTCAGGGGTCAGGGACCCACTTGAGGAGGCAGTCTGCCCGTTCTCAGATCTCCAGCTGCGTGCTGGGAGAACCACTGCTCTCTTCAAAGCTGTCAGACAGGGACACTTAAGTCTGCAGAGG	Intron (ENST00000656143.1/ENST00000656143.1, intron 2 of 5)	1	193349131	193365953	16823	1	101929184	ENST00000660270.1	373998	ENSG00000232077	LINC01031	long intergenic non-protein coding RNA 1031	0.573172	0.813605	0.744101	0.250702	0.704072	-0.877673	0.946339	0.999197	0.400811	0.334511	0.711172	-0.738785	0.376003	0.786777	0.780953	0.231425	0.781216	-0.63228
chr1	195558903	195559054	152	chr1:195558903-195559054	2	TTTGTGGCATTATGTTGGTAGTCAAAAATGTTTAATTTTGGATTTGGGGTTTTCATATTAAGGATGCCCAACTTGTATATTGTTAAAACCGCGGAATACATTATCAGTTTTTTAGATAAATGTTAAGTGCAAGAAATAATTAGTGTACTGCA	Distal Intergenic	1	195747166	195763425	16260	2	105371672	ENST00000657207.1	204371	ENSG00000287364	LOC105371672	uncharacterized LOC105371672	NA	NA	0	NA	NA	0	NA	NA	0	NA	NA	0	NA	NA	0	NA	NA	0
chr1	195722727	195722910	184	chr1:195722727-195722910	3	ACAAACCCTGAGCTAGACACAGGGTGCTGATTGGTGTGTTTACAAACCTTGAGCTAGTACAGAACCTTAGCTAGACATAAAGGTTCTCCACCTACCCAGCAGACTCAGGAGCCCAGCTGGCTTCACCCAGTGGATCCAGCACGGGGGCTGCAGGTGGAGCTGCCTGCCAGTCCCGTGTCGTGTG	Distal Intergenic	1	195747166	195763425	16260	2	105371672	ENST00000657207.1	40515	ENSG00000287364	LOC105371672	uncharacterized LOC105371672	0.544211	0.803215	1.28328	0.123414	0.704072	24.9099	0.667138	0.845217	1.39866	0.114587	0.682531	24.6304	0.502306	0.806744	0.373557	0.393721	0.781216	1.77083
chr1	195722910	195723093	184	chr1:195722910-195723093	10	GCCCACACTTCTTAGCCCTTGGGTGGTCGATGGGACTGGGTGCCGTGGAGCAGGGGGTGGTGCTCGTTGGGGAGGCTCGGGCCGCACAGGAGCCCGTGGAGCAGGGGGAGGTTCAGGCATGGCAGGCTGCAGGTCCCGAGCCCTGCCCCGTGGGCAGGCAGCTAAGGCCCGGCGAGAAATTGAG	Distal Intergenic	1	195747166	195763425	16260	2	105371672	ENST00000657207.1	40332	ENSG00000287364	LOC105371672	uncharacterized LOC105371672	0.544211	0.803215	1.28328	0.123414	0.704072	24.9099	0.667138	0.845217	1.39866	0.114587	0.682531	24.6304	0.502306	0.806744	0.373557	0.393721	0.781216	1.77083
chr1	197708301	197708477	177	chr1:197708301-197708477	3	GTAACCTCTGCAGACTTAAGTGTCCCTGTCTGACAGCTTTGAAGAGAGCAGTGGTTCTCCCAGCACGCAGCTGGAGATCTGAGAACGGGCAGACTGCCTCCTCAAGTGGGTCCCTGACCCCTGACCCCCGAGCAGCCTAACTGGGAGGCACCCCCCAGCAGGGGCACACTGACACCT	Intron (ENST00000620048.6/163486, intron 3 of 22)	1	197658300	197735529	77230	2	163486	ENST00000294738.5	27052	ENSG00000213047	DENND1B	DENN domain containing 1B	0.544211	0.803215	0.729521	0.271179	0.704072	1.43156	0.497166	0.845217	0.135828	0.829008	0.940684	0.431556	0.70677	0.852259	1.11183	0.0519187	0.781216	2.30031
chr1	197708477	197708653	177	chr1:197708477-197708653	1	TCACACAGCAGGGTATTCCAACAGACCTGCAGCTGAGGGTCCTGTCTGTTAGAAGGAAAACTAACAACCAGAAAGGACATCTACACCGAAAACCCATCTGTACATCACCATCATCAAAGACCAAAAGTAGATAAAACCACAAAGATGGGGAAAAAACAGAACAGAAAAACTGGAAAC	Intron (ENST00000620048.6/163486, intron 3 of 22)	1	197658300	197735529	77230	2	163486	ENST00000294738.5	26876	ENSG00000213047	DENND1B	DENN domain containing 1B	0.583211	0.813605	0.412017	0.289678	0.704072	1.27127	0.517875	0.845217	-0.103532	0.851522	0.940684	0.271268	0.731233	0.864372	0.794323	0.0556623	0.781216	2.14002
chr1	199337446	199337593	148	chr1:199337446-199337593	0	TGCCCCAAGTCAACACCACCTCCAGTGCAACTGTGTTCACAGTCTCCAGCAGGGGCCCCTACCTCCCTCCCAGCTGCCTTACCTCTACCACTGTGGTGAATGGCCACAGGGAGGCAGGCACTCCTGCATCTGCTAGTACTCTGCTGCA	Intron (ENST00000452199.1/400800, intron 3 of 3)	1	199148598	199393307	244710	1	400800	ENST00000452199.1	188848	ENSG00000231718	LINC02789	long intergenic non-protein coding RNA 2789	0.0783372	0.603103	-3.08361	0.311493	0.704072	-1.24256	0.147913	0.726107	-1.43777	0.196872	0.682531	-1.3106	0.108967	0.681513	-2.8077	0.511598	0.781216	-0.771006
chr1	200603728	200603879	152	chr1:200603728-200603879	3	CTGCAGATAAAGATATATTTGGGGAGGTTAAGTGTATTCAGTTTGTATTCTCCTTAAAATAATGACCTCAGGAATAAATTTCATCAAAAGGAGAAAAAGCATTCCATTTACCTTTAGTCGATCTCCATTAGTGTGAGCCGTAGAGCAGCGCT	Exon (ENST00000614960.4/9928, exon 8 of 29)	1	200551497	200618723	67227	2	9928	ENST00000614960.4	14844	ENSG00000118193	KIF14	kinesin family member 14	0.329114	0.603103	23.7733	0.123414	0.704072	24.4679	0.484642	0.84435	22.8098	0.27781	0.682531	23.4679	0.167938	0.681513	23.7733	0.0361852	0.781216	24.4679
chr1	200603994	200604146	153	chr1:200603994-200604146	1	ACTTCCAATCAATATAGGTTTTTTTAAAGGGAAAGCTGTAAAAGATTACACATCACTCTTTTATTTTTTAAATAGTCTCTTCTTTTTTTTTGAGACAGGGTCTCACTCTGTTGCCCAGGCTGGAGTACAGTGGCATCATCACGGCTCACTGCA	Intron (ENST00000614960.4/9928, intron 7 of 28)	1	200551497	200618723	67227	2	9928	ENST00000614960.4	14577	ENSG00000118193	KIF14	kinesin family member 14	0.329114	0.603103	23.7733	0.123414	0.704072	24.4679	0.484642	0.84435	22.8098	0.27781	0.682531	23.4679	0.167938	0.681513	23.7733	0.0361852	0.781216	24.4679
chr1	201238617	201238772	156	chr1:201238617-201238772	3	CGTTCTCTGTATTTCCTGAATCTGAATGTTGGCCTGCCTTGCTAGATTGGGGAAGTTCTCCTGGATAATATCCTGCAGAGTGTTTTCCAACTTGGTTCCATTCTCCCCGTCACTTTCAGGTACACCAATCAGACGTAGATTTGGTCTTTACACATA	Distal Intergenic	1	201213096	201228952	15857	1	91156	ENST00000473483.1	25521	ENSG00000163395	IGFN1	immunoglobulin like and fibronectin type III domain containing 1	0.939438	1	1.40363	0.901293	0.951591	-2.16051	0.590763	0.845217	0.78866	0.501448	0.879899	-1.24384	0.700359	0.849857	1.57752	0.700288	0.866374	-1.88903
chr1	201238772	201238927	156	chr1:201238772-201238927	2	AGTCCCATATTTCTTGGAGGCTTTGTTCATTTCTTTTTATTCTTTTTTCTCTAAACTTCCCTTCTCACTTCATTTCATTCCTTTCATCTTCCATCACTGATACCCTTTCTTCCAGTTGATCGCATTGGCTCCTGAGGCTTCTGCATTCTTCACGTA	Distal Intergenic	1	201213096	201228952	15857	1	91156	ENST00000473483.1	25676	ENSG00000163395	IGFN1	immunoglobulin like and fibronectin type III domain containing 1	0.939438	1	1.40363	0.901293	0.951591	-2.16051	0.590763	0.845217	0.78866	0.501448	0.879899	-1.24384	0.700359	0.849857	1.57752	0.700288	0.866374	-1.88903
chr1	201692745	201692896	152	chr1:201692745-201692896	0	CTGCAGTGGGCACCTACAGAGAGAGAAGAATGAAAAGCATGGCCTGTGCCTCCAGGGAGTCAAGCCAGACACTTACCAAATCAGGAGAAACTGGCAGAGATAGTAGCTGCTGGTATTTGAGAGGCAGAAGGCAAGAGTTGAGACAATAAGCC	Intron (ENST00000685211.1/89796, intron 5 of 33)	1	201719508	201719627	120	1	100847050	ENST00000577455.1	-26612	ENSG00000264802	MIR5191	microRNA 5191	0.384517	0.642285	0.615461	0.835531	0.951591	-0.00894398	0.572781	0.845217	0.0552543	0.969648	0.977124	-0.458036	0.282425	0.704731	0.988709	0.680722	0.851361	0.393301
chr1	202361303	202361372	70	chr1:202361303-202361372	1	CTGCAGGCTATACAGGAAGCATGAGGCCAGCATCTGCTCATGGTGAGGGCCTCGGGAAGCTTACAGTCAT	Intron (ENST00000608999.6/4660, intron 1 of 23)	1	202348728	202438242	89515	1	4660	ENST00000476364.5	12575	ENSG00000077157	PPP1R12B	protein phosphatase 1 regulatory subunit 12B	0.644036	0.849049	0.209488	0.205257	0.704072	-23.3358	0.530529	0.845217	-0.516307	0.590902	0.879899	-1.15767	0.771736	0.884174	0.879408	0.173516	0.781216	-23.2666
chr1	202691519	202691660	142	chr1:202691519-202691660	1	GTGCACCTGCAGTTCCAGCTACCTGGGAGGCTGAGGCAGGAGGATCACTTGAGCCCAGGAGGTCGAGGTTGCAGTGAGCTGAAATCATGCCACTGTACTCCAGCCTGAGCAATAGAGAAAGACCCTGTCTCAAAAAGGGAGG	Intron (ENST00000367268.5/127833, intron 1 of 8)	1	202590596	202710454	119859	2	127833	ENST00000367268.5	18794	ENSG00000143858	SYT2	synaptotagmin 2	0.254431	0.603103	2.36589	0.113079	0.704072	-26.7619	0.641273	0.845217	1.40241	0.114587	0.682531	-2.74045	0.064398	0.578892	3.2955	0.173516	0.781216	-26.2119
chr1	202691660	202691801	142	chr1:202691660-202691801	2	GGAGCGAGAGGGGGAGGGAGCGAGGGGGAGAGGGAGAGGGAGAGGGAGAGGGAGAGGGAGAGGGAGAGGGGGGGAGAGAGAGAGAGAGAGAGAGAGAGAGAGAGAGAGAGAGAGAGAGAGAGAGATGGGAGAGGGTGGGAAG	Intron (ENST00000367268.5/127833, intron 1 of 8)	1	202590596	202710454	119859	2	127833	ENST00000367268.5	18653	ENSG00000143858	SYT2	synaptotagmin 2	0.254431	0.603103	2.36589	0.113079	0.704072	-26.7619	0.641273	0.845217	1.40241	0.114587	0.682531	-2.74045	0.064398	0.578892	3.2955	0.173516	0.781216	-26.2119
chr1	203075568	203075726	159	chr1:203075568-203075726	18	ATGGTGCAGGGGGATGACAAGGTGTTTCGCCGCGCGCCCTCCTGGAGGAAGCGCTTCCGGCCGCGGGAGCACCACGGTCGCGGCGGCATGCTCAGCGCTTCCGCGGAGACCCTCCCGGCGGGCTTCCGTGTGTCCACCCTGGGGACCCTGCAGCCCCCA	Promoter (<=1kb)	1	203076003	203076981	979	1	8497	ENST00000594572.1	-277	ENSG00000143847	PPFIA4	PTPRF interacting protein alpha 4	0.353872	0.603103	-24.1205	0.389207	0.704072	-23.9893	0.184235	0.726107	-24.1205	0.210736	0.682531	-23.9893	0.501742	0.806744	-23.1909	0.523999	0.781216	-23.1205
chr1	203075726	203075884	159	chr1:203075726-203075884	14	ACCGGCCCCGCCAAAGAAGATCATGCCTGAAGGTGAGTAACAGGCGGGCTGGGCATGGCCGAGGCCCAGCCGAGCGCGGGCTTCTTCCTGGCACCCCAGGGCCGGGCCGGGTGGAGAGGGGCGAGGCCGAGGCTGGTGCCCCGCGCTCCTGCGCTGCAG	Promoter (<=1kb)	1	203076003	203076981	979	1	8497	ENST00000594572.1	-119	ENSG00000143847	PPFIA4	PTPRF interacting protein alpha 4	0.353872	0.603103	-24.1205	0.389207	0.704072	-23.9893	0.184235	0.726107	-24.1205	0.210736	0.682531	-23.9893	0.501742	0.806744	-23.1909	0.523999	0.781216	-23.1205
chr1	203154550	203154698	149	chr1:203154550-203154698	2	CTGGTAGAAGCCGCACCCATGGTGGGCTTGTCTGGTGTGTGTTGGAGCCATGGAGGAGTCATAACCACTGCCTAGTACACAGCTGGGACAGGGAGGTAGACAGCTCCCCACCACCGCCCCATCCCCACTGCTCCAGCACTGCAGTATTT	Promoter (1-2kb)	1	203152646	203166115	13470	1	134	ENST00000467253.1	1904	ENSG00000163485	ADORA1	adenosine A1 receptor	1	1	-2.29793	0.205257	0.704072	-23.6975	1	1	-0.893003	0.301844	0.682531	-1.29023	0.983438	1	-2.22143	0.244564	0.781216	-23.5734
chr1	204174750	204174905	156	chr1:204174750-204174905	0	CTGCAGTGTGGACTAGCAAGGAGTGGGGATGGGTCCAGAATAGCATGGCATATACCAGTTAGGAGGTCATGGTGCTAGAACTAGCTTGGTCTAGGGTACTTGGGCATGGTGAAGATGAAAAAGATTGGATGGATTTGAGAGAAATTTAGGAAATAG	Intron (ENST00000638118.1/5972, intron 1 of 11)	1	204154819	204166337	11519	2	5972	ENST00000272190.9	-8413	ENSG00000143839	REN	renin	NA	NA	0	0.123414	0.704072	24.6398	0.306975	0.726107	23.6023	0.27781	0.682531	23.6398	0.325495	0.704731	-23.5658	0.0361852	0.781216	24.6398
chr1	204174905	204175060	156	chr1:204174905-204175060	2	GAATCTGCAGGACTTGGTGACAGATCGGATATAGAGAGTGAGGAAGAGATTGGTTTTTGGAGGCACTCTGGGTACATAGAGTGATGGAAGAGAACGAGGATTTCAGAAGGGGAAGAGGGTTGGAGAGACCATAAGTTTGAGGAACTGTTGAGTATG	Intron (ENST00000638118.1/5972, intron 1 of 11)	1	204154819	204166337	11519	2	5972	ENST00000272190.9	-8568	ENSG00000143839	REN	renin	NA	NA	0	0.123414	0.704072	24.6398	0.306975	0.726107	23.6023	0.27781	0.682531	23.6398	0.325495	0.704731	-23.5658	0.0361852	0.781216	24.6398
chr1	204932920	204933062	143	chr1:204932920-204933062	1	CATGGAAGGAGGAAAGATCCTTCCAGGCACAGGGGATCACATGTGTAAGGTATGGAGGCACAGATGGTGTGCTACAGCATGCAGTTAAAAAGCATTTGGGGTTGGTGGTGGGAGGGTAGCGGGGGCAGTTGGAGAGACCTGCA	Intron (ENST00000404977.6/23114, intron 2 of 25)	1	204929409	204954361	24953	1	23114	ENST00000505079.5	3511	ENSG00000163531	NFASC	neurofascin	0.639733	0.849049	1.01907	0.526226	0.818197	-0.0410361	0.623184	0.845217	0.598252	0.498579	0.879899	-0.283335	0.735001	0.868604	1.03689	0.649448	0.823014	0.191127
chr1	205295242	205295395	154	chr1:205295242-205295395	1	TCTGCAGGTGCCAATGTCAGAGGCAGAGCCCTGGTCCAAGGGTGACGTTTCTAACATTCTTATAAAAATCTGTGAAAGACTTTGGCCAGGCCCAGTGGCTCAAGCCTGTGATCCCAGCACTTTAGGAGGCTGAGGCAGGTGGATCTCTTGAGGT	Distal Intergenic	1	205302063	205321745	19683	2	81788	ENST00000367157.6	26350	ENSG00000163545	NUAK2	NUAK family kinase 2	0.152084	0.603103	24.4301	0.945411	0.951591	-1.67052	0.306975	0.726107	23.4666	0.717538	0.879899	-2.67052	0.0464076	0.476039	24.4301	0.596098	0.781216	-0.801766
chr1	205295406	205295558	153	chr1:205295406-205295558	4	AGACCAGCCTGGCCAACATGGCAAAACCCGTCTCTACTAAAAATACAAAAAAATTAGCTGGGTGTGGTGGCATGCACCTGTAGTCCCAGCTACTGGAGGAGCAGGGGGGCGCTGAGGTGGAGGATCGCTTGTGCTCAGGAGGTCGAGGCTGCA	Distal Intergenic	1	205302063	205321745	19683	2	81788	ENST00000367157.6	26187	ENSG00000163545	NUAK2	NUAK family kinase 2	0.152084	0.603103	24.4301	0.945411	0.951591	-1.67052	0.306975	0.726107	23.4666	0.717538	0.879899	-2.67052	0.0464076	0.476039	24.4301	0.596098	0.781216	-0.801766
chr1	205405140	205405438	299	chr1:205405140-205405438	6	TTCCTTCATTTCAACTTTGGCGAATCTGACAATTATGTGTCTTGGAGTTGCTCTTCTCGAGGAGTATCTTTGTGGCGTTCTCTGTATTTCCTGAATCTGAATGTTGGCCTGCCTTGCTAGATTGGGGAAGTTCTCCTGGATAATATCCTGCAGAGTATTTTCCAACTTGGTTCCATTCTCCCCGTCACTTTCAGGTACACCAATCAGACACAGATTTGGTCTTTTCACATAGTCCCATATTTCTTGGAGGCTTTGTTCGTTTCTTTTTATTCTTTTTTCTCTAAACTTCCCTTCTCGCT	Intron (ENST00000367152.5/93273, intron 2 of 3)	1	205381378	205420574	39197	2	93273	ENST00000367152.5	15136	ENSG00000186007	LEMD1	LEM domain containing 1	0.972134	1	2.79434	0.205257	0.704072	-24.0845	0.690137	0.845217	1.83086	0.070489	0.576841	-24.0845	0.614107	0.806744	3.72395	0.350384	0.781216	-23.2157
chr1	206307276	206307426	151	chr1:206307276-206307426	2	GCACTCACAAACCTTGAGCTAAACACAGGGTGCTGATTGGTGTATTTACAATCCCTGAGCTACATATAAAGACTCTCCATGTCCCCACCAGACTCAGGAGCCCAGTTGGCTTCATCTAGTGGATCCCGCACCGGGGCTGCAGGTGGAGCTG	Intron (ENST00000573034.8/23380, intron 3 of 22)	1	206312148	206392904	80757	1	23380	ENST00000604133.1	-4722	ENSG00000266028	SRGAP2	SLIT-ROBO Rho GTPase activating protein 2	0.563548	0.812142	-3.53044	0.734206	0.951591	1.94586	0.746459	0.886342	-2.93077	1	1	2.24718	0.502466	0.806744	-2.81636	0.611875	0.792271	0.313525
chr1	206307426	206307576	151	chr1:206307426-206307576	10	GCCTGCCAGTCCTGCGCTGTGCGCTCGCATTCCTCAGCCCTTGGGTGGTCGATGGGACTGGGCGCCATGGAGCAGGGGGTGGTGCTCGTCGGGGAGGCTCCGGCCGCACAGGAGCCCATGGAGTGGGTGGGAGGCTCAGACATGGCGGGCT	Intron (ENST00000573034.8/23380, intron 3 of 22)	1	206312148	206392904	80757	1	23380	ENST00000604133.1	-4572	ENSG00000266028	SRGAP2	SLIT-ROBO Rho GTPase activating protein 2	0.563548	0.812142	-3.67066	0.734206	0.951591	2.07139	0.746459	0.886342	-3.07098	1	1	2.37487	0.502466	0.806744	-2.93792	0.611875	0.792271	0.331883
chr1	206307576	206307726	151	chr1:206307576-206307726	10	TGCAGGTCCCGAGCCCTGCCCCGCGGGAAGGCAGCTAAGGCCCAGTGAGAAATCGAGCACAGCGCCGATGGGCCGGCACTGCTGGGGGACTCAGTACACCCTCCGCAGCCACTGGCCCGGGTGCTAAGTCCCCCATTGCCCGGGGCCAGCA	Intron (ENST00000573034.8/23380, intron 3 of 22)	1	206312148	206392904	80757	1	23380	ENST00000604133.1	-4422	ENSG00000266028	SRGAP2	SLIT-ROBO Rho GTPase activating protein 2	0.563548	0.812142	-3.67066	0.734206	0.951591	2.07139	0.746459	0.886342	-3.2321	0.975046	0.98031	2.34373	0.523538	0.806744	-2.90822	0.611875	0.792271	0.375849
chr1	207195999	207196150	152	chr1:207195999-207196150	7	CTGCAGTTCCCAGCGTGATCGACACAGAAGACAGGTGATTTCTGCATTTCCAACTGAGGTACCTGGTTCATCGCATTGGGACTGGTTGGACAGTGGGTGCAGCCCATGGAGGGCGAGCTGAAGCAGGATGGGGCGTCGCCTCACCCGGGAAG	Distal Intergenic	1	207104378	207115465	11088	1	722	ENST00000424088.1	91621	ENSG00000123838	C4BPA	complement component 4 binding protein alpha	0.972134	1	1.45908	0.461936	0.75726	2.06809	0.967269	0.999197	0.899373	0.889459	0.940684	1.06809	0.983438	1	1.50457	0.183554	0.781216	2.93685
chr1	208110774	208110952	179	chr1:208110774-208110952	3	CAAGGACTGCAGAGGGAAGGCCCCTTCTCCTGGAGCTGCCCCAAAAGCGGCCACCGGGGCCATTCTTCTTCCTAGAAAGAACATCTTTCTGCTTCCTAGTCAAGCTGCTGGACACTGCAGGTCAGGTTCACCCGCCTGACCACTGCAAATCTCTTAGCTCATTTTACTCCCCTCTGTTT	Intron (ENST00000367033.4/5362, intron 4 of 31)	1	208106102	208107655	1554	1	105372887	ENST00000668227.1	4672	NA	LOC105372887	uncharacterized LOC105372887	0.329114	0.603103	24.2347	0.389207	0.704072	-24.0331	0.484642	0.84435	23.2712	0.210736	0.682531	-24.0331	0.167938	0.681513	24.2347	0.523999	0.781216	-23.1643
chr1	208110952	208111130	179	chr1:208110952-208111130	1	TTCTAACAGTGATTCAGCTGGGTGAATCAGGAGCCAGACAGCAAGAGAGGTGATACCAGAAGGTGAAGAGGGACATAGATTGGGAAGGGTGAAAGATTCCCTAAGGGATTTTTTTTTAAACGACAGTCTTGTTCTGTCACCCAGGCAGGAGTACAGTGGTGCAATCACAGCTCACTGCA	Intron (ENST00000367033.4/5362, intron 4 of 31)	1	208106102	208107655	1554	1	105372887	ENST00000668227.1	4850	NA	LOC105372887	uncharacterized LOC105372887	0.329114	0.603103	24.2347	0.389207	0.704072	-24.0331	0.484642	0.84435	23.2712	0.210736	0.682531	-24.0331	0.167938	0.681513	24.2347	0.523999	0.781216	-23.1643
chr1	208258343	208258485	143	chr1:208258343-208258485	1	AGCTGCAGAGATGTGATATTAGGCTGTTTGGCTGCGATTAGATGCCAGCAACTCTAACTTGGCTTCATTCTTACCACAAGGCTTCAGTGCACTGACTATCAGCTCTGATGACATGAGAATAGGTGAGACTGTCACTGCTGCAG	Intron (ENST00000691549.2/ENST00000691549.2, intron 1 of 1)	1	208022242	208244384	222143	2	5362	ENST00000367033.4	-13959	ENSG00000076356	PLXNA2	plexin A2	0.154943	0.603103	-3.6256	0.0189745	0.704072	-25.0843	0.379548	0.84435	-0.294094	0.0177031	0.576841	-3.2676	0.159534	0.681513	-3.98139	0.0450382	0.781216	-24.444
chr1	209584654	209584805	152	chr1:209584654-209584805	1	CTGCAGTGCTTGTCTGGCCAGCCTCTTGCTCTGGAGTCAGATAAATTGATCATGAGGAAAGCCTCTGAGAAGGGTCAAGAGAGTCAAGCAGATTCCGCCTTAGGTAAGAAGATGATCTTTTCCAGATCATAAGCTGAAGACAGAACAAGGTC	Promoter (<=1kb)	1	209583729	209609913	26185	1	57172	ENST00000423146.5	925	ENSG00000008118	CAMK1G	calcium/calmodulin dependent protein kinase IG	0.329114	0.603103	21.7635	0.389207	0.704072	-21.5619	0.306975	0.726107	23.185	0.753887	0.879899	1.35398	0.649975	0.806744	-1.07834	0.350384	0.781216	-23.0781
chr1	209888761	209888961	201	chr1:209888761-209888961	7	GAGTGCTGATTGGTGCATTTACAAACTTTGAGCTAGATACAGAGTGCCGATTGATTTACAATCCCTTAGCTAAACATAAAGGTTTCTCCAAGTCCTCGCTAAACTCAGGAGCCCAGCTGGCTTCACCCAGTGGATCCCGCACCCGGGCTGCAGGTGGAGCTGCCTGCCAGTCCCGCGCCTTGTTTCCGCACCCCTCAGCCC	Distal Intergenic	1	209900923	209952756	51834	1	255928	ENST00000652023.1	-11962	ENSG00000143469	SYT14	synaptotagmin 14	0.353872	0.603103	-22.8879	0.389207	0.704072	-23.3124	0.690137	0.845217	-0.337411	0.717538	0.879899	-1.28004	0.325495	0.704731	-23.2627	0.350384	0.781216	-23.1924
chr1	209888961	209889161	201	chr1:209888961-209889161	21	CTTGGGCGGTGGATGGGACGAAAGGGCGCCGCGGAGCAGGGGGCGGCGCTCGTCGGGGAGGCTGTACAGGAGTCCACGGCGGGTTGGGGGAGGCTCAGGCATGGCGGGCTGCAGGTCCCGAGCCCTGCCCCGCGGGGAGGCAGCTAAGGCCCGGCGAAATAATCGAGCCAGCGTCGGTGGGCCGGCACTGCTGGGGGACCC	Distal Intergenic	1	209900923	209952756	51834	1	255928	ENST00000652023.1	-11762	ENSG00000143469	SYT14	synaptotagmin 14	0.353872	0.603103	-22.8879	0.389207	0.704072	-23.3124	0.690137	0.845217	-0.337411	0.717538	0.879899	-1.28004	0.325495	0.704731	-23.2627	0.350384	0.781216	-23.1924
chr1	209918884	209919059	176	chr1:209918884-209919059	2	GAGTTTCCAGTTTTTCTATTCTGTTTTTTCCCCATCTTTGTGGTTTTATCTACTTTTGGTCTTTGATGATGGTGATGTACAGATGGGTTTTCGGTGTAGATGTCCTTTCTGGTTGTTAGTTTTCCTTCTAACAGACAGGACCCTCAGCTGCAGGTCTGTTGGAATACCCTGCCGTG	Intron (ENST00000652023.1/255928, intron 1 of 1)	1	209900923	209952756	51834	1	255928	ENST00000652023.1	17961	ENSG00000143469	SYT14	synaptotagmin 14	0.629989	0.849049	-1.66327	0.835531	0.951591	-0.214915	0.752937	0.892427	-1.82265	0.837545	0.940684	-0.510845	0.568258	0.806744	-1.02564	0.869662	0.982645	0.120018
chr1	209919059	209919234	176	chr1:209919059-209919234	2	GTGAGGTGTCAGTGTGCCCCTGCTGGGGGGTGCCTCCCAGTTAGGCTGCTCAGGGGTCAGGGGTCAGGGACCCACTTGAGGAGGCAGTCTGCCCGTTCTCAGATCTCCAGCTGCGTGCTGGGAGAACCACTGCTCTCTTCAAAGCTGTCAGACAGGGACACTTAAGTCTGCAGAGG	Intron (ENST00000652023.1/255928, intron 1 of 1)	1	209900923	209952756	51834	1	255928	ENST00000652023.1	18136	ENSG00000143469	SYT14	synaptotagmin 14	0.597761	0.821254	-1.75161	0.835531	0.951591	-0.214915	0.733104	0.876761	-1.911	0.818747	0.939494	-0.409099	0.550401	0.806744	-1.0982	0.869662	0.982645	0.0379652
chr1	211127593	211127735	143	chr1:211127593-211127735	0	TTTGTTTTCATTTAATTTTGGTCATGTGCTCCTATTAACATAACTCTCAATGACCCTGTTTTATTAGGTACTAGATTGTTTGGGCAACATCACTACTAAAGACAAAAGAAGAAAATACCAAATGCTGGCAAGGATGTGCTGCA	Intron (ENST00000367007.5/3756, intron 1 of 11)	1	211132588	211133374	787	2	100874296	ENST00000438597.1	5639	NA	KCNH1-IT1	KCNH1 intronic transcript 1	1	1	-3.24138	0.461936	0.75726	1.41768	0.693404	0.845217	0.313339	0.61507	0.879899	0.482058	0.689972	0.838465	-3.99296	0.393721	0.781216	2.14801
chr1	211514957	211515142	186	chr1:211514957-211515142	7	AGTAGAAGGACACCTGGTCTGTGTCCGGGGCTGGGTTCGAATCCCCACTCTGCCTGTGAGCTGAGAGCCCATGGGCACATCACCTGAGCTTTCTGCGTTTATCTGTAAAATGGGCAAGAGGCAATCAGTCATTTATATGAAAGCGGCCTGCAGTGCCTGGCACCGAGGCGGGCACGGATGGGCATT	Distal Intergenic	1	211476522	211492162	15641	2	343035	ENST00000680073.1	-22795	ENSG00000198570	RD3	retinal degeneration 3, GUCY2D regulator	0.173089	0.603103	-24.7252	0.389207	0.704072	-22.5982	0.234049	0.726107	-5.08803	0.889459	0.940684	0.956525	0.22065	0.681513	-23.8723	0.244564	0.781216	-23.8019
chr1	211515142	211515327	186	chr1:211515142-211515327	12	TTGGTAAGGCAGGGAGGAGGAGCGCGGCGCCTGGAGGCTCCCGGGGCAGGGGAGAAGGGCATCGAGAACGGGGGCGGCGTGCGGGGTGGGAAGAGGAGAGAGTTCACGGCTTGCTCCTTCCCCTGCCCCCAGCCGCCTCAGCCCAGGCCTGAGTCTCTCCCCGTCTGGGCCTCTGCTTCCTGCAGG	Distal Intergenic	1	211476522	211492162	15641	2	343035	ENST00000680073.1	-22980	ENSG00000198570	RD3	retinal degeneration 3, GUCY2D regulator	0.173089	0.603103	-24.7252	0.389207	0.704072	-22.5982	0.234049	0.726107	-5.08803	0.889459	0.940684	0.956525	0.22065	0.681513	-23.8723	0.244564	0.781216	-23.8019
chr1	211815547	211815725	179	chr1:211815547-211815725	1	CTGCAGAGTAGAATTACAAATGGGAATCTGATTTCATCATTCCCTTACTTAAAACTCTTCGATGGTTTCCTCAAGATAAATTTCAAAATCCTTAATATGCACTACAAAGCTTTAAAGGATTTGGCCTCACCAGCTTCCCTCAACCACTAAACTCCTCTCCCCCTCACTCCCTCCCTGCT	Intron (ENST00000366997.9/9926, intron 2 of 7)	1	211829636	211839933	10298	1	102723727	ENST00000429499.6	-13911	ENSG00000229258	LPGAT1-AS1	LPGAT1 antisense RNA 1	0.0884075	0.603103	-23.701	0.650754	0.941196	-1.21195	0.195925	0.726107	-2.32949	0.875719	0.940684	-0.704338	0.105385	0.681513	-23.225	0.566733	0.781216	-1.07209
chr1	212695578	212695810	233	chr1:212695578-212695810	4	GGCTGCAGCGAGCCATGATCATGCCATCACACTCCAGCCTGGGCAACAGAGCAAGATCCCGTCTCAAAAAGACAAGAAAGTATAGCAGGAGAGAGCTAAACTAAAATCTTTAATTACACACACCAACCCCGACAAAGACAAGAACATGGAATGGTGGCCCATTCCTCAGATAGATCCTTGGATGCTTTCAAGGCCAGTTCCTGGTATGGAGCAGCTCCACGTCCCAACTGCAG	Promoter (2-3kb)	1	212686418	212698755	12338	2	55509	ENST00000478275.1	2945	ENSG00000123685	BATF3	basic leucine zipper ATF-like transcription factor 3	0.972134	1	0.8374	0.945411	0.951591	-0.491376	0.690137	0.845217	-0.126074	0.717538	0.879899	-1.49138	0.614107	0.806744	1.76701	0.596098	0.781216	0.377379
chr1	213010234	213010412	179	chr1:213010234-213010412	5	TCTGCAGAGCCATTCAGATTTATAACAAAATTTCTATAGGGAAAACAGAACTGATTGGCCGGGCGTGGTGGCTCACACCTGTAATCCCAGCACTTTGGGAGGCCAAGGCGGGTGGATCACAAGGTCAGGAGACCAAGACCATCCTGGCTAACACCGTGAAACCCCGTCTCTACTAAAAA	Promoter (1-2kb)	1	213005125	213011463	6339	2	90806	ENST00000476904.5	1051	ENSG00000174606	ANGEL2	angel homolog 2	0.329114	0.603103	23.1617	0.891077	0.951591	1.33841	0.306975	0.726107	22.7626	0.753887	0.879899	0.338415	0.614107	0.806744	2.06278	0.561579	0.781216	2.20717
chr1	213010412	213010590	179	chr1:213010412-213010590	7	AATACAAAAATTTAGCCGGGCGTGGTGGCGGGCACCTGCAGTCCCAGCTACTCGGGAGGCTGAGACAGGAGAATGGCGTGAACCTGGGAGGTGGAGCTTGCAGTAAGCTGAGATTGCGCCATTGCACTCCAGCCTGGGCAACAGAGTGAGCCTTCGTCTCAAAAAAAAAAAAAAAAAGA	Promoter (<=1kb)	1	213005125	213011463	6339	2	90806	ENST00000476904.5	873	ENSG00000174606	ANGEL2	angel homolog 2	0.329114	0.603103	23.1617	0.891077	0.951591	1.33841	0.306975	0.726107	22.7626	0.753887	0.879899	0.338415	0.614107	0.806744	2.06278	0.561579	0.781216	2.20717
chr1	214450011	214450225	215	chr1:214450011-214450225	4	TAGTCCCAGCTACTCAGGAGGCTGACGCAGGAGGATTGCGGGAGCCCAGGAGTTTGTGGCTGCAGTGAACTATGATTGTGCCACTGCACTCCAGTGTAAGTGACAGAGCAAGACTCTATCTCAAAATAAATAAATAAATAAATAAATAAATAAAAGCCAAATTAAAGAAAGCAAGCAGAGGCCGGGCGCAGTGGCTCACCCCTGTCATCCTAGCA	Intron (ENST00000366956.10/5784, intron 3 of 18)	1	214372246	214376406	4161	2	5784	ENST00000473261.1	-73605	ENSG00000152104	PTPN14	protein tyrosine phosphatase non-receptor type 14	NA	NA	0	0.292615	0.704072	22.437	0.484642	0.84435	21.3996	0.456779	0.828721	21.437	0.501742	0.806744	-21.363	0.146673	0.781216	22.437
chr1	214450262	214450414	153	chr1:214450262-214450414	7	AGGAGTTCGAGACCAGCCTGGCCAACATGGTGAAACCCCGTCTCTACCATAAATACAAAAATTAGCCAGCCGTGGTGGCAGGCGCCTATAATCCCAGCCACTCGGGAGGCTGAGGCACGAGAATCGCTTGAACCTGGGAGGTGGAGGCTGCAG	Intron (ENST00000366956.10/5784, intron 3 of 18)	1	214372246	214376406	4161	2	5784	ENST00000473261.1	-73856	ENSG00000152104	PTPN14	protein tyrosine phosphatase non-receptor type 14	NA	NA	0	0.292615	0.704072	22.437	0.484642	0.84435	21.3996	0.456779	0.828721	21.437	0.501742	0.806744	-21.363	0.146673	0.781216	22.437
chr1	215572148	215572300	153	chr1:215572148-215572300	2	CCTGCAGATCGTACAGAAGAATCAAGTCTCCGTTTTGTACAGAACATTTAACTGAGTTTTAGAGTGTGATTCTGTTTATCACACATAAGTTTCAATAAACATTTACTGGGTGTGTGCTAGGTGCTAAGAACAATGCTTTTAGGTGGTCCTCTC	Promoter (1-2kb)	1	215573786	215581179	7394	1	51133	ENST00000448333.1	-1486	ENSG00000136636	KCTD3	potassium channel tetramerization domain containing 3	0.152084	0.603103	24.7922	0.945411	0.951591	0.238151	0.306975	0.726107	23.8287	0.717538	0.879899	-0.761849	0.0464076	0.476039	24.7922	0.596098	0.781216	1.10691
chr1	215572446	215572598	153	chr1:215572446-215572598	0	TGCAAAGTTGAGAGATCTGTGAGACTTCTGACACTACTCTGTATAAGCCTTGGTAGTCACAGTCACCCTGGCCTGCAATCCAGTGCTATTTAATAGCCCACTTAGAAGATGGGAATGGGAAGTAGGATGTATTTTGAGGTTTGTTATGCTGCA	Promoter (1-2kb)	1	215573786	215581179	7394	1	51133	ENST00000448333.1	-1188	ENSG00000136636	KCTD3	potassium channel tetramerization domain containing 3	0.152084	0.603103	24.7922	0.945411	0.951591	0.238151	0.306975	0.726107	23.8287	0.717538	0.879899	-0.761849	0.0464076	0.476039	24.7922	0.596098	0.781216	1.10691
chr1	218014314	218014490	177	chr1:218014314-218014490	2	GAGTTTCCAGTTTTTCTGTTCTGTTTTTTCCCCATCTTTGTGGTTTTATCTACTTTTGGTCTTTGATGATGGTGATGTACAGATGGGTTTTCGGTGTAGATGTCCTTTCTGTTTGTTAGTTTTCCTTCTAACAGACAGGACCCTCAGCTGCAGGTCTGTTGGAATACCCTGCCGTGT	Distal Intergenic	1	218043505	218059140	15636	1	101929631	ENST00000456026.1	-29015	ENSG00000232100	LINC01653	long intergenic non-protein coding RNA 1653	0.605055	0.823411	-1.2807	0.529389	0.819975	0.261031	0.276341	0.726107	-1.90182	0.469713	0.847218	0.513774	0.915454	1	-0.495125	0.700288	0.866374	-0.114499
chr1	218014490	218014666	177	chr1:218014490-218014666	2	TGAGGTGTCAGTGTGCCCCTGCTGGGGGGTGCCTCCCAGTTAGGCTGCTCAGGGGTCAGGGGTCAGGGACCCACTTGAGGAGGCAGTCTGCCCGTTCTCAGATCTCCAGCTGCGTGCTGGGAGAACCACTGCTCTCTTCAAAGCTGTCAGACAGGGACACTTAAGTCTGCAGAGGTT	Distal Intergenic	1	218043505	218059140	15636	1	101929631	ENST00000456026.1	-28839	ENSG00000232100	LINC01653	long intergenic non-protein coding RNA 1653	0.605055	0.823411	-1.2807	0.529389	0.819975	0.261031	0.276341	0.726107	-1.90182	0.469713	0.847218	0.513774	0.915454	1	-0.495125	0.700288	0.866374	-0.114499
chr1	218880454	218880596	143	chr1:218880454-218880596	1	GACAGCCAGAGGAACTGCCTGGCAGATCTTTCACCAAAATAAGAGGTTGATCTGCCTGGGCCTGGCAAAGGGAATCCAATGCCTACTCGTGGCTGGCACACCCCCTGCCCTCACTCCCACCCTAGGATACAGTTCCTTCTGCA	Distal Intergenic	1	218912757	218916184	3428	2	105372925	ENST00000446002.1	35588	NA	LINC01710	long intergenic non-protein coding RNA 1710	0.520664	0.799316	1.63404	0.84568	0.951591	-0.498367	0.486983	0.845217	1.27956	0.395448	0.814416	-1.27235	0.651855	0.807992	1.21175	0.700288	0.866374	0.233959
chr1	219410759	219410909	151	chr1:219410759-219410909	10	CTGCTGGCCCCGGGCAATGGGGGACTTAGCACCCGGGCCAGTGGCTGTGGAGGGTGTACTGAGTCCCCCAGCAGTGCTGGCCCACCGGCGCTGCGCTCGATTTCTCGCCGGGCCTTGGCTGCCTTCCCACGGGGCAGGGCTCGGGACCTGC	Intron (ENST00000664470.1/107984018, intron 2 of 2)	1	219409538	219433030	23493	2	107984018	ENST00000658964.1	22121	NA	LOC107984018	uncharacterized LOC107984018	0.583211	0.813605	-0.018907	0.292615	0.704072	22.2624	1	1	-0.982381	0.176959	0.682531	23.4653	0.236697	0.690204	0.910704	0.983422	0.987893	-0.705267
chr1	219410909	219411059	151	chr1:219410909-219411059	8	CAGCCCACCATGCCTGAGCCTCCCACCCACTCCATGGGCTCCTGTGTGGCCCGAGCCTCCCCGACGAGCGCCACCCCCTGCTCCATGGCGCCCAGTCCCATCAACCACCCAAGGGCTGAGGAATGCGAGCGCACGGCACAGGACTGGCAGG	Intron (ENST00000664470.1/107984018, intron 2 of 2)	1	219409538	219433030	23493	2	107984018	ENST00000658964.1	21971	NA	LOC107984018	uncharacterized LOC107984018	0.544211	0.803215	1.1455	0.292615	0.704072	22.2624	0.967269	0.999197	0.18203	0.176959	0.682531	24.1447	0.22065	0.681513	2.07511	0.983422	0.987893	-1.52771
chr1	219411059	219411209	151	chr1:219411059-219411209	3	GCAGCTCCACCTGCAGCCCCGGTGCCGGATCCACTAGGTGAAGCCAGCTGGGCTCCTGAGTCTGGTGGGGACGTGGAGAGTCTTTATATCTAGCTCAGGGATTGTAAATACACCAATCAGCACCCTGTGTTTAGCTCAAGGTTTGTCAGTG	Intron (ENST00000664470.1/107984018, intron 2 of 2)	1	219409538	219433030	23493	2	107984018	ENST00000658964.1	21821	NA	LOC107984018	uncharacterized LOC107984018	0.544211	0.803215	1.1455	0.292615	0.704072	22.2624	0.967269	0.999197	0.18203	0.176959	0.682531	24.1447	0.22065	0.681513	2.07511	0.983422	0.987893	-1.52771
chr1	220412539	220412692	154	chr1:220412539-220412692	7	CTGCTGGCCCTGGGCAATGAGGGACTTAGCACCTGGGCCAGTGGATGCAGAGGGTGTACTGGGTCCCCCAGCAGTGCTGGCCCACCGGCGCTGTGCTCGATTTCTCGCAGGGCCTTAGCTGCCTTCCCGCAGGGCACGGGTCGGGACCTGCAGC	Distal Intergenic	1	220485104	220487558	2455	2	105372929	ENST00000446169.2	74866	NA	LINC02779	long intergenic non-protein coding RNA 2779	0.173089	0.603103	-23.2896	0.389207	0.704072	-23.9345	0.267894	0.726107	-0.117009	0.920918	0.940684	-1.50044	0.22065	0.681513	-23.7996	0.244564	0.781216	-23.7292
chr1	220412692	220412845	154	chr1:220412692-220412845	8	CCCGCCATGCCTGAGCCTCCCACCTACTCCATGGACTCCTGTGCAGCCCGAGCCTCCCCGATGAGCACCACCCCCTGCTCCACGGCGCCCAGTCCCATCGACCACCCAAGGGCTGAGGAATGCAAGCGCACGGTGCAGGACTGGCAGGCAGCTC	Distal Intergenic	1	220485104	220487558	2455	2	105372929	ENST00000446169.2	74713	NA	LINC02779	long intergenic non-protein coding RNA 2779	0.173089	0.603103	-23.2896	0.389207	0.704072	-24.1568	0.267894	0.726107	0.105384	0.920918	0.940684	-1.72283	0.22065	0.681513	-23.944	0.244564	0.781216	-23.8736
chr1	220412845	220412998	154	chr1:220412845-220412998	4	CCACCTGCAGCCCCGGTGCGGGATACACTAGGTGAAGCCAGCTGGGCTCCTGAGTCTGGTGGGGACGTGGAGAGTCTTTATGTCTAGCTCAGGGATTGTAAATACACCAATCAGCACCCTGTGTTTAGCTCAAGGTTTGTGAGTGCACCAATCG	Distal Intergenic	1	220485104	220487558	2455	2	105372929	ENST00000446169.2	74560	NA	LINC02779	long intergenic non-protein coding RNA 2779	0.173089	0.603103	-23.2896	0.389207	0.704072	-24.1568	0.267894	0.726107	0.105384	0.920918	0.940684	-1.72283	0.22065	0.681513	-23.944	0.244564	0.781216	-23.8736
chr1	220580266	220580417	152	chr1:220580266-220580417	1	TTGAGGCCAGGAGTTCAAGACCAGCCTGGGCAACATGGCAAAACCCCAGCTCTACAAAAAATACAGAAATTAGCTGGGCTTGGTGGTGTGCAACTGTAGCTACTTGGGAGCTTGAGGTGAGGATTACTTGAGCCCGGGAGGTCAAGGCTGCA	Intron (ENST00000366917.6/4139, intron 2 of 17)	1	220593998	220631036	37039	1	4139	ENST00000678409.1	-13581	ENSG00000116141	MARK1	microtubule affinity regulating kinase 1	0.802442	1	-0.150959	0.949033	0.954806	-0.0550502	0.481366	0.84435	-0.229684	0.928207	0.943663	-0.130496	0.987369	1	-0.00882047	0.937368	0.986213	0.0362282
chr1	220800940	220801082	143	chr1:220800940-220801082	0	CTGCAGCAGCCTGGCTTCACTGGCCTCCTTGCCCCACCCTTGACCCAGCCCTGCACCATCCATGGGCTGTTCTCAGCACATCCATCAAGGTAACCCTGTTGATGTAAGTCACATCATGTGATTTGTCTGCTCAAAGCCCTCTC	Exon (ENST00000694919.1/64757, exon 5 of 8)	1	220797762	220805093	7332	1	64757	ENST00000472269.1	3178	ENSG00000186205	MTARC1	mitochondrial amidoxime reducing component 1	0.0884075	0.603103	-25.5929	0.389207	0.704072	-23.9645	0.0173132	0.726107	-25.5929	0.889459	0.940684	0.141751	0.22065	0.681513	-24.6633	0.244564	0.781216	-24.5929
chr1	220894201	220894477	277	chr1:220894201-220894477	28	CGCTGCAGCGGGCACCAGCTACGTTTTGCTGTCGGCGGCAGTTACCCGGACGCAAGTTAAGGGGTAGGCGCGCAGAGGCGGTTGGAGGCGGGCGGCCGGCCCCTGACCTCGGAGAGCTGCGCCGAGCAGGGCGGAAAATTTATGGTCTGTGTACACTTTCTGGCTCCAGAGCCCCGCGCACCAGAAGGATGGGGCCCTGCGAGCGCGCCCCAGGCCGCGAGCTGGGGCCGCAGGCGCCACGGCCATGTATAGTGCCCACCCGACTCTGTTCTGCAGC	Distal Intergenic	1	220881069	220884493	3425	1	3142	ENST00000427693.1	13132	ENSG00000136630	HLX	H2.0 like homeobox	0.152084	0.603103	26.1336	0.891077	0.951591	0.575621	0.306975	0.726107	25.1701	0.753887	0.879899	-0.424379	0.0464076	0.476039	26.1336	0.561579	0.781216	1.44438
chr1	222241313	222241494	182	chr1:222241313-222241494	1	AAATTAAAGTAGTAACAAAGGAAGGCAGAGTAGTTTACCTAGCTAGCTTGTTTACCCATGTGGTCTTAAGACTAACCTCTGACGTACTGCAGGTGCTTAAGTGCTTTTTACTTGGGAAGTCCACAATGTCAATTACCCTCTAATAGTGTTGACTCAAGCCACTGTTAATTAATCTTACTGAA	Intron (ENST00000652067.1/ENST00000652067.1, intron 3 of 6)	1	222010825	222064773	53949	2	107985307	ENST00000668844.1	-176540	NA	LINC01705	long intergenic non-protein coding RNA 1705	1	1	-1.51795	0.389207	0.704072	-24.3873	0.65379	0.845217	-2.48142	0.717538	0.879899	-2.3127	0.649975	0.806744	-0.588337	0.350384	0.781216	-23.9328
chr1	222469446	222469744	299	chr1:222469446-222469744	5	TGACCGACTGAGAGTGGGGACAACTCTGGGGAGGAGCCAGAGGGCAACAAGGGCTTTGGTGGGAAGGTATTTGCACCTGTCATTCCTTCCTCCTTTACTCCTGCCGCCCCTTGCTGGATCCTGAGCCCCCAGGGTCCCCCGATCCACCTGCAGCTTTTGGCAAAGTCTATGGTCCCACCCTGTCCTCCTCCTACACATACTCGGATGCTTCCTCCTCAACCTTGGCACCCACCTCCTTCTTACTGGGCCCAGGAGCCTTCAAAGCCCAGGAGTCTGGTCAAGGCAGCAGAGCGGGCCCC	Exon (ENST00000422015.1/ENST00000422015.1, exon 1 of 1)	1	222479174	222486207	7034	2	105372956	ENST00000617077.1	16463	NA	LOC105372956	uncharacterized LOC105372956	0.972134	1	2.13988	0.113079	0.704072	-23.5602	0.641273	0.845217	2.33968	0.122775	0.682531	-2.30332	0.771736	0.884174	0.436451	0.173516	0.781216	-23.108
chr1	223394154	223394452	299	chr1:223394154-223394452	12	CAGCCCTTGGCCTCCAGCAAAGAGATGCGGAGCCCGCACACCCAGGTCCTGAAGAGCAAGCTGGAAGAGGTGGTGGTGTCCTCCCAGGACCAGCAGATTGTGGCCCTGGTGCTGACCCGTCTCAAGAAGGCCCAGAGGATACGGGAGCTGCAGCAGCAGGCGGCTAAGGCCTGGGAGGAGCTGAAGCGCTCGGATCAGAAGGTCCAGATGACCCTGGAGCGGGAGCGCCGGCTGCTGCTGCGGCAGAGCCAGGAGCAGTGGCAGGAGAAGGAGCAGCGCAAGACCCTCCAGAGCCCTGA	Promoter (<=1kb)	1	223393415	223395465	2051	1	164127	ENST00000366875.5	739	ENSG00000178395	CCDC185	coiled-coil domain containing 185	0.152084	0.603103	26.5477	0.650754	0.941196	-2.8456	0.136921	0.726107	26.1036	0.567181	0.879899	-3.70116	0.457244	0.806744	2.20658	0.785469	0.928082	-1.9942
chr1	223394511	223394668	158	chr1:223394511-223394668	11	TGGAAGGAGCAACCAGAGGACCAGGAGAGCCCGCGCCAGGAGAAGCTGGAGAAGGCGCGCGCCCAGGCAGAGCACCGAAAACAGTGCCAGGTGCGGCGCCTGCGGGAGCAGGAGAAGATGCTACGGAACCTCCGGGAGCAGCACAGCCTGCAGCTGCA	Promoter (1-2kb)	1	223393415	223395465	2051	1	164127	ENST00000366875.5	1096	ENSG00000178395	CCDC185	coiled-coil domain containing 185	0.506552	0.782886	6.07557	0.650754	0.941196	-2.81902	0.457108	0.84435	5.60787	0.851129	0.940684	-3.54184	0.70677	0.852259	2.23227	0.589105	0.781216	-1.9856
chr1	223949499	223949713	215	chr1:223949499-223949713	6	ACATGGATCCCCCACACTGGAGGACCCCACCACGCCCAAATGCAAGATGAGAAGATGCTCCAGCTGCAGTCCAAAGCCCAACACCCCCAAGTGTTCCATGTGTGATGGGGACAGCTTCCCCTTTGCCTGTACAGGTGGAGAAGCCGAGGACAGGCTCAGGGAACCGGAGACCGAGAAGGCGCTGTCCTCTTCACTGCACGTGCCCTGGACCAGTG	Exon (ENST00000424045.2/ENST00000424045.2, exon 2 of 3)	1	223982754	223988154	5401	2	441124	ENST00000431663.1	38441	NA	GTF2IP20	general transcription factor IIi pseudogene 20	0.506552	0.782886	1.68871	0.692012	0.951591	-1.12643	0.934592	0.999197	0.725231	0.301844	0.682531	-2.12643	0.205398	0.681513	2.61832	0.950293	0.986213	-0.257679
chr1	223949920	223950218	299	chr1:223949920-223950218	10	CCCGAGAGTCACGTGAGGCTGAGAGTAGGGGCAGGGGCAGCAGTGGTGCCAGTCGGGGGGCGGTCCAGTGGGAGGAGCCTCAGCCTCACGGGCTGCTCCGTGGGACTGATGACTGCATGATCTTCTGGGCACCTCACGGATCTTCAACTGCAGGTGAAACGGATGCTGGTGGTGGGTGCAGGGCCGCTGGGAGCTGCTGCGTGGTTCCCAGAGGCTGGACTGGGGCAGGTGCCAACTGAAGCTGCTGGGGCAGCATGGGCAGGATGTTCTGCACACAAACCTTGGAGAAGATGTGTGCA	Intron (ENST00000424045.2/ENST00000424045.2, intron 2 of 2)	1	223982754	223988154	5401	2	441124	ENST00000431663.1	37936	NA	GTF2IP20	general transcription factor IIi pseudogene 20	0.506552	0.782886	1.68871	0.692012	0.951591	-1.12643	0.934592	0.999197	0.725231	0.301844	0.682531	-2.12643	0.205398	0.681513	2.61832	0.950293	0.986213	-0.257679
chr1	224616178	224616359	182	chr1:224616178-224616359	25	GGCGGCGCTTCGCCACCCACCTTTCCTCAGCCCCCGGCGCTGCAGTCTCCGCCCGCCGGGGAGGGCGCGCTCAGCGGAACAGGAGTCGAGGGTGGGGCGCCGAGAGGAGGGAATCCCGGGTCGCACCGCTACAGTTCTCGCAGTGGCAAAGGCGGCGGCGGCGGCGGCGGCAGCGGCAGCAG	Promoter (<=1kb)	1	224608130	224616220	8091	2	102723817	ENST00000437416.3	0	ENSG00000233384	CNIH3-AS2	CNIH3 antisense RNA 2	0.329114	0.603103	23.4132	0.945411	0.951591	-0.525637	0.306975	0.726107	23.9052	0.717538	0.879899	-1.52564	0.649975	0.806744	0.198728	0.596098	0.781216	0.343118
chr1	224616359	224616540	182	chr1:224616359-224616540	18	GCAGGTGGAGCGAGCTACAGCGTTTGGCCTGAAACCCACTGCTGCAGCCACCCGGGCTGGAGTTGGCCCGTTGGGTGGAGCCAGTGCTCGCCCCGGTCCGACCCCCGGTTTCCGGGACACTTGGGTTGCGGAGGCCGGCTGGCCGGAGTCACGGTTGGGGACGGGCGCGCCTCGGAGCGCAC	Promoter (<=1kb)	1	224616317	224740554	124238	1	149111	ENST00000272133.4	42	ENSG00000143786	CNIH3	cornichon family AMPA receptor auxiliary protein 3	0.329114	0.603103	23.4132	0.945411	0.951591	-0.525637	0.306975	0.726107	23.9052	0.717538	0.879899	-1.52564	0.649975	0.806744	0.198728	0.596098	0.781216	0.343118
chr1	224888779	224889059	281	chr1:224888779-224889059	5	TCAGCAACTCACCTGGACTGTACTGCCACAAGGCTTCAGAGACAGCCCCCATTACTTTAGTCAAGCTCTTTCTCATGATCTACTTTCTTTCCGTCCATCTGTTTCTCACCTTATTCAATATATGGGCGACCTTCTCCTCTGCAGCCCCTCTTATGAATCTTCCTAACAGGATACCCTCCTGCTCCTTCAACATCTATTCTGAAAGGGGTATTGCGTATCCCCTTCTAAAGCCCAAATTTCTTCCCCATCCATTACGTATCTCGGCATAGTCCTTCATCAAA	Distal Intergenic	1	224896262	225399269	503008	1	127602	ENST00000445597.6	-7203	ENSG00000185842	DNAH14	dynein axonemal heavy chain 14	0.152084	0.603103	24.5597	0.205257	0.704072	-25.098	0.136921	0.726107	24.4221	0.567181	0.879899	-4.74991	0.457244	0.806744	1.37224	0.173516	0.781216	-24.3152
chr1	225472905	225473090	186	chr1:225472905-225473090	12	TGCGCTCGATTTCTCGCCAGGCCTTAGCTGCCTTCCCGCGGGGCAGGGCTTGGGACCTGCAGCCCGCCATGCCTGAGCCTCCCACCCCCTCCATGGGCTCCTATGCGGCCCGAGCCTCCCCGAGGAGCACCACCCCCTGCTCCACGGCACCCAGTCCCATCGACCACCCAAGGGCTGAGGAGTGCG	Intron (ENST00000632561.1/ENST00000632561.1, intron 1 of 1)	1	225447233	225465400	18168	2	105373110	ENST00000654950.1	-7505	NA	LINC02765	long intergenic non-protein coding RNA 2765	0.254431	0.603103	3.62322	0.945411	0.951591	-0.511842	0.641273	0.845217	2.65974	0.639663	0.879899	-0.282942	0.064398	0.578892	4.55283	0.785469	0.928082	-0.473818
chr1	225473090	225473275	186	chr1:225473090-225473275	5	GAGCGCACGGCGAGGGACTGGCAGGCAGCTCCACCTGCAGCCCCGGTGCGGGATCCACTAGGTGAAGCCAGCTGGGCTCCTGAGTCTGGTGGGGATGTGGAGAGTCTTTATGTCTAGCTCAGGGATTGTAAATACACCAATCATCACCCTGTGTTTAGCTCAGGGGGCACCAATCAACACTCTGTA	Intron (ENST00000632561.1/ENST00000632561.1, intron 1 of 1)	1	225447233	225465400	18168	2	105373110	ENST00000654950.1	-7690	NA	LINC02765	long intergenic non-protein coding RNA 2765	0.506552	0.782886	3.17581	0.389207	0.704072	-24.7742	0.934592	0.999197	2.21233	0.920918	0.940684	-1.08544	0.205398	0.681513	4.10542	0.244564	0.781216	-24.7362
chr1	225731396	225731576	181	chr1:225731396-225731576	2	TTTCCAAAATCTGACCCTAGCCTTGCTTTTCAGCTTCATCCCCGCTACTTCCCTTCTTGTGCTCCAGATACTTGGACTTCCCCAGCAATCGCCTCCCTGTGCTTTTGTTCTGGTGGTTTTTTTCCCCACTGACCTCACTCCTCTTCTCCTCCCTTTCCCAGCCTCCTGAACTCATTCTCAT	Intron (ENST00000448264.2/102723834, intron 1 of 2)	1	225735855	225745604	9750	1	107985352	ENST00000665855.1	-4279	NA	LOC107985352	uncharacterized LOC107985352	0.591244	0.821254	0.655205	0.238006	0.704072	1.31334	0.702455	0.853073	0.397608	0.525588	0.879899	0.759827	0.570239	0.806744	0.623854	0.137384	0.781216	1.37917
chr1	225731576	225731756	181	chr1:225731576-225731756	0	TCCTCAAAGGCCAATGCAAATATTAATTCTCTGCAGGTTTCTCTGGACAGAATCAATCATCCTCTCTATGGTGTTCCCATAGCATTTTGTCTAACTGCTAGAGAAACATTTAGCATGGTATCAGATGCCTCCTGATAGACTGGGATTTCACTGAGGACATGGAATGTGTCATATTTATCTT	Intron (ENST00000448264.2/102723834, intron 1 of 2)	1	225735855	225745604	9750	1	107985352	ENST00000665855.1	-4099	NA	LOC107985352	uncharacterized LOC107985352	0.591244	0.821254	0.655205	0.238006	0.704072	1.31334	0.702455	0.853073	0.397608	0.525588	0.879899	0.759827	0.570239	0.806744	0.623854	0.137384	0.781216	1.37917
chr1	226083729	226083904	176	chr1:226083729-226083904	17	GCCTGCAGTGAGGTCCGCTCCTGAGGCCTCAGCCTCGCCGGGGGTAGGGCCCTCTCCCGCCGTCGCCGCAGCTCCTTTCCGTCCCGGGGCCTGGGGGGCACCGTCCCACGGGTGAGGGCCGCCTCCAGCGCCTGGCCCAGCCATGCGAACGCCTGGAGCCCGCGAGCTGCAGCTGC	Promoter (<=1kb)	1	226083951	226090292	6342	1	105373113	ENST00000412855.2	-47	NA	LINC01703	long intergenic non-protein coding RNA 1703	0.152084	0.603103	25.469	0.891077	0.951591	0.966205	0.306975	0.726107	24.5055	0.753887	0.879899	-0.033795	0.0464076	0.476039	25.469	0.561579	0.781216	1.83496
chr1	226135236	226135388	153	chr1:226135236-226135388	8	CTGCAGAACCCTGCTCCACGCTGCTTCCTCGCCCTGGCGTTTGGGAGCCTGATGACAGCCCTGCCCGTGAAGGCCGCACCTAGGGACAATGTCAGGCTGAGGAGTGAGCCCACGTGGCGCTGGCTCCGATGCTGCTGCCCTCTGTGCACTCAG	Distal Intergenic	1	226148003	226155071	7069	1	107985353	ENST00000440540.1	-12615	ENSG00000234478	ACBD3-AS1	ACBD3 antisense RNA 1	0.583211	0.813605	-0.0714145	0.205257	0.704072	-23.8141	1	1	-1.03489	0.320819	0.687733	-0.582562	0.236697	0.690204	0.858196	0.244564	0.781216	-24.018
chr1	226402567	226402721	155	chr1:226402567-226402721	3	CACGATCTTCCCCAAGGGTCAGAAGACTGTAGCCCACTGTTCTTGAGCTCATTCTCTTAGGACACCAAACACAGCCACGAGAAAGGTGGCCTTTTACCACTGAGCTCTGCCCCACGTCCCTTTTGACCACACACTGCTACATTTAGTGGTGAGCT	Intron (ENST00000366794.10/142, intron 1 of 22)	1	226399195	226407982	8788	2	142	ENST00000366790.4	5261	ENSG00000143799	PARP1	poly(ADP-ribose) polymerase 1	1	1	-0.287775	0.205257	0.704072	-24.7521	0.65379	0.845217	-1.25125	0.070489	0.576841	-24.7521	0.649975	0.806744	0.641836	0.350384	0.781216	-23.8833
chr1	226402721	226402875	155	chr1:226402721-226402875	0	TGCCTCATGGCCTAGTGAAATGCACAGAAGACACTTGTGCAGAGTCACAATCCTGCAGCATCTGCTGGGAATGGCCAGACAACTGCTCCAGGCTTGCCTGGACTCAAAGGGCCTGTGTGCCCCAGAAAAGGGCTCTTTAAGTGCCTCTGCAGTTA	Intron (ENST00000366794.10/142, intron 1 of 22)	1	226399195	226407982	8788	2	142	ENST00000366790.4	5107	ENSG00000143799	PARP1	poly(ADP-ribose) polymerase 1	1	1	0.0341535	0.205257	0.704072	-24.5801	0.65379	0.845217	-0.929321	0.070489	0.576841	-24.5801	0.649975	0.806744	0.963764	0.350384	0.781216	-23.7114
chr1	226638311	226638482	172	chr1:226638311-226638482	3	GCACATTCCCCCTGCCTGCAGCCTCAGAGCTTGCCAGGAGCCAAGGGAAGCCTCCCCAGCTGGAAAAGGAAGATTTCCCAGTTCCAGCCGGTACTGAGTCTCCTTGGAGAAACGGCTGCCTGGTCCGCCCCCACTTGCTCTGCAGCTGCTGTGGACTGTTCAGAAGGTGCCA	Intron (ENST00000272117.8/3707, intron 6 of 7)	1	226656640	226659670	3031	2	100506443	ENST00000443422.1	21188	NA	ITPKB-IT1	ITPKB intronic transcript 1	0.152084	0.603103	25.0536	0.389207	0.704072	-23.8811	0.306975	0.726107	24.0901	0.717538	0.879899	-0.783288	0.0464076	0.476039	25.0536	0.350384	0.781216	-23.9832
chr1	226638482	226638653	172	chr1:226638482-226638653	4	ATTCACAGGGGCTCCAGGGCCCGTGTCCCAGATGTGCCTGGATCTCTGACTGTCCCAGGGAGCCGTGCACTTGGGGCACAGTGGCACAATATTCCCTGACTCAGCTGGAAGGGTCAGTGCTCTGGTCCCTGTGGGCAGAGCATCTATCCAGTCTGCGAGCCGCTGCAGCAGC	Intron (ENST00000272117.8/3707, intron 6 of 7)	1	226656640	226659670	3031	2	100506443	ENST00000443422.1	21017	NA	ITPKB-IT1	ITPKB intronic transcript 1	0.152084	0.603103	25.1551	0.389207	0.704072	-24.0738	0.306975	0.726107	24.1916	0.717538	0.879899	-0.975933	0.0464076	0.476039	25.1551	0.350384	0.781216	-24.0847
chr1	226666845	226666996	152	chr1:226666845-226666996	2	CTGCAGGACAAAGACCACAGACCACACATGGACTCTCAAGGGCTCTCGCCTCTCCCCACCAATGCGTCCCTTCACTCCCTGGGCTGTTGCAAAACTGATCTGGTTGTGTTTGCCAACACACACCACACTGCTTCATGCTCCTGAACCTTTTG	Intron (ENST00000272117.8/3707, intron 2 of 7)	1	226656640	226659670	3031	2	100506443	ENST00000443422.1	-7175	NA	ITPKB-IT1	ITPKB intronic transcript 1	0.152084	0.603103	25.0583	0.500398	0.783633	1.44377	0.0927196	0.726107	25.1523	0.925237	0.94116	0.443771	0.731233	0.864372	0.887339	0.15445	0.781216	2.31253
chr1	227726120	227726284	165	chr1:227726120-227726284	2	CTGCAGGGTTTTCTTTCCTTTTTCTTTTTTTTTTTTTTTTTTTTTTTGAGACAGAGTTTCACTCTTGTGGCCTGGGCTGGAGTGCAATGGCACAATCTTGGCTCACTGCAACCTCTGCCTCCCGGGTTCAAGCGTTTCTCCTGCCTCAGCCTCCCAAGTAGCTGG	Promoter (1-2kb)	1	227728200	227781821	53622	1	116841	ENST00000681827.1	-1916	ENSG00000143740	SNAP47	synaptosome associated protein 47	0.353872	0.603103	-23.1106	0.428214	0.73461	1.97799	0.934592	0.999197	0.809266	0.858173	0.940684	0.977985	0.22065	0.681513	-24.2699	0.170235	0.781216	2.84674
chr1	227914477	227914635	159	chr1:227914477-227914635	2	AGCGGGAGCCCCCAGCTGTTGCCATGGATGTGGGCCCAACACAAACACAGGATGCTAGGCTCCTCTGCCAGCCCTGGACCCCCCACCTCCAGTCTGGCCCTGCGCAGGGTTGGGTGGGCAGATGAGGTCATTGCCATGGGAGCCCCCTCTGCAGGGCTG	Distal Intergenic	1	227941590	227941683	94	2	100847072	ENST00000584300.1	27048	ENSG00000264483	MIR5008	microRNA 5008	0.152084	0.603103	25.1653	0.945411	0.951591	-1.8114	0.306975	0.726107	24.2018	0.717538	0.879899	-2.8114	0.0464076	0.476039	25.1653	0.596098	0.781216	-0.942647
chr1	227914635	227914793	159	chr1:227914635-227914793	6	GCAGGGGGAGTGTTTATTTGGTCTTGTTTCCCTGGCAATCTGCTGGACCCCTGCTCCACTCCGTCCACCATCCACGGGGGCGTTCCAGCAAAGCCGGCCAGCCAGGCCCCGCTGCCCTTGGTGCCTACGCCAGCCCCTCCACCTGGCCTGGCCAGCCCC	Distal Intergenic	1	227941590	227941683	94	2	100847072	ENST00000584300.1	26890	ENSG00000264483	MIR5008	microRNA 5008	0.152084	0.603103	25.8747	0.891077	0.951591	0.304075	0.306975	0.726107	24.9112	0.753887	0.879899	-0.695925	0.0464076	0.476039	25.8747	0.561579	0.781216	1.17283
chr1	227914793	227914951	159	chr1:227914793-227914951	0	CACAGCAGACCCCTGCCCAGAATCCCAGGCTATCAGGCAGGGGCTGCCTCCTAAGGGGTGGATAGGGAAACTAAGGCCCTGGAGCCTGGCAGAGGCAGGACCAGGCACAGCCAGGACTCTGGTCCCCAGCCTAGGCCCTCTGCAGCCCCCAGGAGTGGC	Distal Intergenic	1	227941590	227941683	94	2	100847072	ENST00000584300.1	26732	ENSG00000264483	MIR5008	microRNA 5008	0.152084	0.603103	25.8747	0.891077	0.951591	0.304075	0.306975	0.726107	24.9112	0.753887	0.879899	-0.695925	0.0464076	0.476039	25.8747	0.561579	0.781216	1.17283
chr1	228278666	228278837	172	chr1:228278666-228278837	12	CCATGCCCCCACCACGTTCACAGAGCTGCCAGTGACCCTCGTGCGCCCGCTGCGGGACAAGATTGCCATGGAGAAGCACCGCGGTGTGCTGGAGTGTCAGGTGTCCCGGGCCAGCGCCCAGGTGCGGTGGTTCAAGGGCAGTCAGGAGCTGCAGCCCGGGCCCAAGTACGAG	Promoter (1-2kb)	1	228277178	228284195	7018	1	84033	ENST00000366706.7	1488	ENSG00000154358	OBSCN	obscurin, cytoskeletal calmodulin and titin-interacting RhoGEF	0.353872	0.603103	-22.4031	0.389207	0.704072	-22.2718	0.690137	0.845217	0.693543	0.753887	0.879899	0.862262	0.325495	0.704731	-23.4747	0.350384	0.781216	-23.4043
chr1	228278837	228279008	172	chr1:228278837-228279008	6	GCTGGTCAGTGATGGCCTCTACCGCAAGCTGATCATCAGTGATGTCCACGCAGAGGACGAGGACACCTACACCTGTGACGCCGGTGATGTCAAGACCAGTGCACAGTTCTTCGTGGAAGGTGCAGGCAGGGAGGGCAGCTCTGCAGGTTGCTTTTGTTGGGGGGAGTCTCCC	Promoter (1-2kb)	1	228277178	228284195	7018	1	84033	ENST00000366706.7	1659	ENSG00000154358	OBSCN	obscurin, cytoskeletal calmodulin and titin-interacting RhoGEF	0.353872	0.603103	-22.4031	0.389207	0.704072	-22.2718	0.690137	0.845217	0.693543	0.753887	0.879899	0.862262	0.325495	0.704731	-23.4747	0.350384	0.781216	-23.4043
chr1	228352770	228352914	145	chr1:228352770-228352914	4	TCACTGCAGGGGGCCCTAAGGCCGTGTGGGTCCCCCAGGGATGCTGTGGCGGGGCTGGGGCCCTTCCCCTTGTGGGAGACACACCAGGATGGGGGCTGCCCGTGCTCCCAACATGGCCACAGGGAGAGGGCCCTACCCGTGGGGA	Promoter (<=1kb)	1	228353007	228361250	8244	1	84033	ENST00000474237.2	-93	ENSG00000154358	OBSCN	obscurin, cytoskeletal calmodulin and titin-interacting RhoGEF	0.152084	0.603103	24.9797	0.891077	0.951591	0.687084	0.306975	0.726107	24.0162	0.753887	0.879899	-0.312916	0.0464076	0.476039	24.9797	0.561579	0.781216	1.55584
chr1	228352914	228353058	145	chr1:228352914-228353058	9	AGCCTTGGGCTCTGAGCCGGCCCTGCCGTCCTTGCAGCTGGTGAACCGGCTGGGCTCCGCGCGGGCTAGTGCGGAGCTGCGCATTCAGAGCCCCATGCTGCAGGCCCAGGAGCAGTGTCACAGGGAGCAGCTCGTGGCTGCAGTG	Promoter (<=1kb)	1	228353007	228361250	8244	1	84033	ENST00000474237.2	0	ENSG00000154358	OBSCN	obscurin, cytoskeletal calmodulin and titin-interacting RhoGEF	0.152084	0.603103	24.9797	0.891077	0.951591	0.687084	0.306975	0.726107	24.0162	0.753887	0.879899	-0.312916	0.0464076	0.476039	24.9797	0.561579	0.781216	1.55584
chr1	228457469	228457610	142	chr1:228457469-228457610	17	GCAGTACGGCCTGGATGTTGGGCAGGACGCCACCCTGCGCGATGGTCACGCGGCCCAGCAGCTTGTTGAGCTCCTCGTCGTTGCGGATGGCCAGCTGCAGGTGGCGCGGGATGATGCGCGTCTTCTTGTTGTCGCGCGCCGC	Promoter (<=1kb)	1	228456979	228457873	895	2	92815	ENST00000366695.3	263	ENSG00000181218	H2AW	H2A.W histone	NA	NA	0	0.123414	0.704072	26.0158	0.306975	0.726107	24.764	0.176959	0.682531	25.4057	0.325495	0.704731	-24.7275	0.170235	0.781216	2.83254
chr1	228457610	228457751	142	chr1:228457610-228457751	18	CGTTGCCGGCAAGCTCCAGGATCTCGGCAGTCAAGTACTCGAGCACCGCGGCCAGATAGACCGGGGCGCCGGCGCCCACGCGCTCCGAATAGTTGCCCTTGCGGAGCAACCGGTGCACGCGGCCCACGGGGAACTGCAGCCC	Promoter (<=1kb)	1	228456979	228457873	895	2	92815	ENST00000366695.3	122	ENSG00000181218	H2AW	H2A.W histone	NA	NA	0	0.292615	0.704072	24.8585	0.484642	0.84435	23.2901	0.27781	0.682531	24.6173	0.501742	0.806744	-23.2536	0.561579	0.781216	1.67522
chr1	229343046	229343281	236	chr1:229343046-229343281	26	CTGCAGGCGGGAGGCGGTGGCGCCGCCTCAGTCCCGGAGCCTCCACGCGCGCTCCCGGCCCCCGGGCCTCCGCCCGCTCCGTGGGGGCGGCTGCTTCCGTAGAGAGCGCGAGGCGCGGGGGTGCGGGCGTGCCTGCCAGTCCGAGGGGCCCAGGCCCAGGTCCCTGGCCCACTTATTTGAGGTGCCCGTCCACCCTGGTCCCAGCAGACGCTGTCCCAGGCACGCGTCACTCTGCA	Promoter (<=1kb)	1	229321015	229343047	22033	2	126731	ENST00000284617.7	0	ENSG00000154429	CCSAP	centriole, cilia and spindle associated protein	0.972134	1	0.457267	0.205257	0.704072	-23.8933	0.690137	0.845217	-0.506207	0.070489	0.576841	-23.8933	0.614107	0.806744	1.38688	0.350384	0.781216	-23.0245
chr1	230356933	230357084	152	chr1:230356933-230357084	12	CTGCAGGGAGTCGAGGAAGGGCTGGACCTTGTAGAGCCCGTGCGTGGTCTGGCTGGAGCGGAAGGCCACGACGTGGAAGTACTTGAGGATCTTCTCGAAGCGGGCCTGGCTCATGACGAGGGCGAGGCTGCGGTTGCTGTAGAAGCCTCCGC	Exon (ENST00000391860.7/79605, exon 2 of 7)	1	230323248	230377645	54398	2	79605	ENST00000525115.1	20561	ENSG00000177614	PGBD5	piggyBac transposable element derived 5	0.329114	0.603103	22.1494	0.389207	0.704072	-22.8935	0.306975	0.726107	22.7349	0.717538	0.879899	-1.67012	0.649975	0.806744	0.0542443	0.350384	0.781216	-22.628
chr1	231611328	231611497	170	chr1:231611328-231611497	1	TCAGCTGCAGGTTGGGGGTTCTCTTAGACAAGCCATGTGGCTTGACTCTCAATTTTCCTCTTGCCTGAGAGACTCTCCCTGTCTTCTCTCCTCTTTCACAAAGACCACCTGAGCCCATAGTGGTTTTCTGCCTCCTCCGAAGTTCTAAGTAACTTTAAAAAATGTGTCTC	Promoter (<=1kb)	1	231591292	231612090	20799	2	100287814	ENST00000448058.1	593	ENSG00000229228	LINC00582	long intergenic non-protein coding RNA 582	0.979795	1	0.0674491	0.734206	0.951591	0.0255046	0.795906	0.927284	-0.669868	0.900429	0.940684	-0.501148	0.755974	0.877329	0.771329	0.635027	0.811045	0.486621
chr1	232682700	232682906	207	chr1:232682700-232682906	2	CGAGACCAGCCTGGGCAACATGGCAACATGGCAAGACCCTGTCTCTCCAAAAATACAAAAATTAGCCTGGTGTGGTGGCATGAGCCTGTAGTCCCAGCTACTTGGGAGGCTGAGGTGGGAGGATCACTTGAGCCTGAGAGGTGGAGGCTGCAGTGAGCCATGATCATGCCACCGCACTCCAGCCTGGGTGACAGAGGGAGATCCTGT	Distal Intergenic	1	232718071	232722250	4180	1	105373199	ENST00000430921.1	-35165	ENSG00000225919	LINC01745	long intergenic non-protein coding RNA 1745	0.3233	0.603103	-0.166937	0.945411	0.951591	-0.675309	0.517875	0.845217	-0.826076	0.443466	0.828721	-0.657357	0.219923	0.681513	0.50057	0.611875	0.792271	-0.42032
chr1	232682906	232683112	207	chr1:232682906-232683112	1	TCTCAAAAAAAAAAAAGCTGCTTTGGATATTGGTAATTTTCTCTCTGTGGCTTGAGGTTGTAGTCCCAGCTATTTGGGAGGCTGAGGTGGGAGGATCACTTGAGCCTGAGAGGTGGAGGCTGCAGTGAGCCATGATCATGCCACCGCACTCCAGCCTGGGTGACAGAGGGAGATCCTGTCTCAAAAAAAAAAAAAAAAAAAAAAAAA	Distal Intergenic	1	232718071	232722250	4180	1	105373199	ENST00000430921.1	-34959	ENSG00000225919	LINC01745	long intergenic non-protein coding RNA 1745	0.3233	0.603103	-0.166937	0.945411	0.951591	-0.675309	0.517875	0.845217	-0.826076	0.443466	0.828721	-0.657357	0.219923	0.681513	0.50057	0.611875	0.792271	-0.42032
chr1	234067600	234067748	149	chr1:234067600-234067748	3	GACTACCTGGCGAAGAAGCTTGGGTTGTCCTCCTGGAGGATAAGAAATCACGTGGCAAAGAGAGTCCCAGCCAATAGCCAGCACCACCACACATGTGAGTGAGGACATTTGATACCACCTAGCCCGAGCTGAGCCTCCAGATGACTGCA	Intron (ENST00000366618.8/148641, intron 2 of 7)	1	234214271	234324511	110241	1	148641	ENST00000366617.3	-146523	ENSG00000183780	SLC35F3	solute carrier family 35 member F3	0.544211	0.803215	1.38904	0.205257	0.704072	-23.8862	0.667138	0.845217	1.53615	0.639663	0.879899	-0.0826025	0.502306	0.806744	0.358237	0.173516	0.781216	-24.3737
chr1	234214458	234214628	171	chr1:234214458-234214628	17	AGGCGATCGGCGGCAGCGCTCCTGCAGGCGGCCGGCTCATCATGAAGAAGCACTCGGCCCGGGTGGCCCCGCTCAGCGCCTGCAACAGTCCGGTCCTGACCCTTACCAAAGTGGAAGGTAATGCGCGGCCGCCTCGCCCCGGGGGTCCCTGCACCCTAGCCGGGGAATGCT	Promoter (<=1kb)	1	234214271	234324511	110241	1	148641	ENST00000366617.3	187	ENSG00000183780	SLC35F3	solute carrier family 35 member F3	0.329114	0.603103	22.7733	0.292615	0.704072	22.8473	0.306975	0.726107	22.3395	0.27781	0.682531	22.377	0.614107	0.806744	2.17264	0.561579	0.781216	2.31703
chr1	234612011	234612220	210	chr1:234612011-234612220	4	TTGGTCACTCCCAGGCCCTGCTGTTGCACACCGCTTTCAAGACCTGTCCCTTTGGTCACCCTCCTCAGAGACCCTGTGACACTCATTCCAGTACATGCCTTCACCCACTGCGTCACTGCCCAAAGGGGATGAAGTCCAGTCCTTGTGCTGCAGAGAAATGAACCAACTCATCGCCCCCAAGAGACGGCCCCACTAAGCATTGACTGAAAC	Promoter (1-2kb)	1	234604269	234610178	5910	2	359948	ENST00000366609.4	-1833	ENSG00000168264	IRF2BP2	interferon regulatory factor 2 binding protein 2	0.3233	0.603103	0.655129	0.945411	0.951591	-3.39876	0.720045	0.863081	-0.308345	0.61507	0.879899	0.388769	0.0817492	0.650611	1.58474	0.757708	0.912001	-4.15519
chr1	234978480	234978633	154	chr1:234978480-234978633	4	GCTCACAGCAGCCCACAGTCACAAAGCAGAACTGAAACCCCCTACAGGCAGCATCTCAGGTCAGCTGTGCGGACAGCGCTACCTGCCACAGGCCACACCAGCTGCAGTGCGGTGACGGGTGGTGTTCTATGCCTGGGATAGTGTCACCCTGCCA	Promoter (2-3kb)	1	234978814	234980804	1991	2	107985366	ENST00000549744.2	2171	NA	LOC107985366	uncharacterized LOC107985366	0.329114	0.603103	23.9957	0.123414	0.704072	24.9418	0.203351	0.726107	23.9875	0.176959	0.682531	24.025	0.983438	1	1.09087	0.170235	0.781216	5.21796
chr1	235036120	235036262	143	chr1:235036120-235036262	1	CTGCAGCCTCGACTTCACTGGCTCAAGCAATCCTTCTACCTCAGCCTCCCAAGTGGCTGGGACTCCAGGCATGCACCACCACACCTGGCTAATTTTTTTTTTTTTTTTTGCAGAGATAGGGTTAATTGAGCATTTTTTCCTCC	Distal Intergenic	1	235064927	235069796	4870	2	731656	ENST00000701981.1	33534	NA	LINC01348	long intergenic non-protein coding RNA 1348	0.329114	0.603103	23.7173	0.389207	0.704072	-23.5156	0.484642	0.84435	22.7538	0.210736	0.682531	-23.5156	0.167938	0.681513	23.7173	0.523999	0.781216	-22.6469
chr1	235140403	235140561	159	chr1:235140403-235140561	11	GCCGGCCCCGGGCAGTGAGGGGCTTAGCACCCGGGCCAGTGGCTGCGGAGGATGTACTGGGTCCCCCAGCAGTGCCAACCCACTGGCGCTACGCTCGATTTCTCACCGGGCCTTAGCTGCCTTCCCGCAGGGCAGGGTTCGGGACCTGCAGCCCGCTAT	Intron (ENST00000408888.8/23029, intron 6 of 10)	1	235131649	235136114	4466	2	23029	ENST00000495224.1	-4289	ENSG00000188739	RBM34	RNA binding motif protein 34	0.329114	0.603103	20.4157	0.292615	0.704072	24.437	0.306975	0.726107	23.4902	0.27781	0.682531	23.5277	0.649975	0.806744	-2.94738	0.561579	0.781216	5.09177
chr1	235140561	235140719	159	chr1:235140561-235140719	9	TGCCTGAGCCTCCCACCCCCTCCATGGGCTCCTGTGCGGCCCGAGCCTCCCCGAGGAGCGCCACCCCCTGCTCCACGACGCCCAGTCCCATCGACCACCAAAGGGCTGGGGAGTGCAGGCGCACGGCATGGGATTGGCAGGCAGCTCCACCTGCAGCCC	Intron (ENST00000408888.8/23029, intron 6 of 10)	1	235131649	235136114	4466	2	23029	ENST00000495224.1	-4447	ENSG00000188739	RBM34	RNA binding motif protein 34	0.329114	0.603103	20.4157	0.292615	0.704072	24.437	0.306975	0.726107	23.4902	0.27781	0.682531	23.5277	0.649975	0.806744	-2.94738	0.561579	0.781216	5.09177
chr1	235341264	235341414	151	chr1:235341264-235341414	2	TTGCAGTGAGCCGAGATCACGCCACTGCACTCCAGCCTGGGCAACAGAGCAAAACTCTGTCTCAAATAATTAATAAATAAACTAGCTTCCTTTTCAAAAAAAGAAATAAATTAGGTCCTAAGTCCTAAAAGCCCATCCTACTTTAAAATTG	Promoter (<=1kb)	1	235342252	235448929	106678	1	6905	ENST00000642431.1	-838	ENSG00000284770	TBCE	tubulin folding cofactor E	0.972134	1	2.52653	0.205257	0.704072	-23.3153	0.934592	0.999197	2.00474	0.301844	0.682531	-2.44709	0.983438	1	1.88784	0.244564	0.781216	-22.8283
chr1	235341420	235341718	299	chr1:235341420-235341718	1	TCAAGTTCAGATGAAAAGAGTGGACTAGTAGGCAACTGAAGTGCTTTAGAGTCTCCCGTGCCTGCCCTAATTTTAGAAGGTTGTGCACTTTATGATCCAGATTTCTGAGTGGTTGAGAATGAGTTATTGAGCAGTGCAAGGCAAGCTCTGCAGTAGGTAATGGATTGATGAGGCTGGATTTAGCAAGTCTGATCAATCTAAAGGAAGTTTCTGAATGTGTTTTTTGTAGTTAAAATACTCATAATTAAAACACTTATCACATTGTCACATTTTATTTTTAAATTGCAGGTAAACAAGTG	Promoter (<=1kb)	1	235342252	235448929	106678	1	6905	ENST00000642431.1	-534	ENSG00000284770	TBCE	tubulin folding cofactor E	0.972134	1	2.52653	0.205257	0.704072	-23.3153	0.934592	0.999197	2.00474	0.301844	0.682531	-2.44709	0.983438	1	1.88784	0.244564	0.781216	-22.8283
chr1	235386383	235386525	143	chr1:235386383-235386525	2	CTGCAGAGTGTTTTCCAACTTGGTTCCATTCTCCCCGTCACTTTCAGGTACACCAATCAGACGTAGATTTGGTTTTTTCACATAGTCCCATATTTCTTGGAGGCTTTGTTCATTTCTTTTTATTCTTTTTTCTCTAAACTTCC	Intron (ENST00000643418.1/6905, intron 2 of 7)	1	235380073	235430804	50732	1	6905	ENST00000646929.1	6310	ENSG00000284770	TBCE	tubulin folding cofactor E	0.0733743	0.603103	23.3972	0.214871	0.704072	2.89965	0.136921	0.726107	22.6506	0.590902	0.879899	1.89965	0.0698084	0.604003	3.62402	0.0521754	0.781216	3.76841
chr1	236124749	236124890	142	chr1:236124749-236124890	2	GAGAGAAGCCCCCATTTGGGGGTTGTGGGGAAGCAGGCATCTGCCAGAGATTCCACGTGGTTCTGGCACGTCTCAGGCCAGCCTGGGCTTTAATTCCTTGGCTAACCCTCCTTCCTTTCTTGCTGAAGTAAATGAGATATGG	Intron (ENST00000650982.2/ENST00000650982.2, intron 2 of 2)	1	236142505	236205198	62694	1	7107	ENST00000419162.5	-17615	ENSG00000077585	GPR137B	G protein-coupled receptor 137B	0.348734	0.603103	-1.02753	0.205257	0.704072	-24.0778	0.0920896	0.726107	-1.99101	0.567181	0.879899	-1.77914	0.744146	0.869065	-0.0979222	0.173516	0.781216	-23.7759
chr1	236124890	236125031	142	chr1:236124890-236125031	2	GTTTATGACGTTTGCAGCTCAGGGGGTCTTGACTAATATAGTCTCTATGGAGTCAGATCCTGATGTTCAGCTACTCTTGGTCAATGGTTCCTGCCGGGGCTCTGGCCTCTCACTCCTGTAGTAGTGCAGGGCACTGCAGGGC	Intron (ENST00000650982.2/ENST00000650982.2, intron 2 of 2)	1	236142505	236205198	62694	1	7107	ENST00000419162.5	-17474	ENSG00000077585	GPR137B	G protein-coupled receptor 137B	0.348734	0.603103	-1.02753	0.205257	0.704072	-24.0778	0.0920896	0.726107	-1.99101	0.567181	0.879899	-1.77914	0.744146	0.869065	-0.0979222	0.173516	0.781216	-23.7759
chr1	236736306	236736448	143	chr1:236736306-236736448	3	CTGCAGTGGGCGGAGTATGCATTATTTCAGTGACCGCTGTGAAGCCCATCACTGGGAAAGGATGCTAACAGGCTGATGAGGACTTTAAAGGAAAGGCCTGGGGACAGGCTGCGGGCCCAGAAGCCAGTTAGGCAAGCTTCTCT	Exon (ENST00000684286.1/88, exon 9 of 21)	1	236731250	236762848	31599	1	88	ENST00000651781.1	5056	ENSG00000077522	ACTN2	actinin alpha 2	0.0733743	0.603103	24.3172	0.891077	0.951591	2.47345	0.203351	0.726107	23.3537	0.858173	0.940684	3.1069	0.0134976	0.476039	24.3172	0.950293	0.986213	-0.0700522
chr1	237024557	237024743	187	chr1:237024557-237024743	2	GAGTTTCCAGTTTTTCTGTTCTGTTTTTTCCCCATCTTTGTGGTTTTATCTACTTTTGGTCTTTGATGATGGTGATGTACAGATGGGTTTTCGGTGTAGATGTCCTTTCTGGTTGTTAGTTTTCCTTCTAACAGACAGGACCCTCAGCTGCAGGTCTGTTGGAATACCCTGCCGTGTGAGGTGTCAG	Distal Intergenic	1	237042184	237833988	791805	1	6262	ENST00000366574.7	-17441	ENSG00000198626	RYR2	ryanodine receptor 2	0.102436	0.603103	-2.23581	0.78751	0.951591	-0.502466	0.0301311	0.726107	-2.78355	0.716618	0.879899	-0.814742	0.278846	0.704731	-1.40047	0.865928	0.980814	-0.0732203
chr1	237024743	237024929	187	chr1:237024743-237024929	2	GTGTGCCCCTGCTGGGGGGTGCCTCCCAGTTAGGCTGCTCAGGGGTCAGGGGTCAGGGACCCACTTGAGGAGGCAGTCTGCCCGTTCTCAGATCTCCAGCTGCGTGCTGGGAGAACCACTGCTCTCTTCAAAGCTGTCAGACAGGGACACTTAAGTCTGCAGAGGTTACTGCTGTCTTTTTGTTTGT	Distal Intergenic	1	237042184	237833988	791805	1	6262	ENST00000366574.7	-17255	ENSG00000198626	RYR2	ryanodine receptor 2	0.102436	0.603103	-2.23581	0.78751	0.951591	-0.502466	0.0301311	0.726107	-2.78355	0.716618	0.879899	-0.814742	0.278846	0.704731	-1.40047	0.865928	0.980814	-0.0732203
chr1	237042089	237042372	284	chr1:237042089-237042372	36	TACCTGCAGCAGCGGGGAGCCGCCGAGCTCCTCCCCGCCCGCCCCCACACCCCACCCCCACCGCTGCACTAACCCCGGCTCAGCTGGCTCCGCGCACTTGCTCGGAGGAGCCGGGGCCGAGCGGACCGCCGGCTGCAGGCAGCGAGCGCGGCTGGGCTGCGGGGCTGCTTCCCCGCGTCCTCCGGGCCCGGGCCGCCCTCCTCCCGCACAGTGCGGAGCAGGGAGGCCCCGCGCCTCGACCACCCGCGCCCGAGCGTCCGCGCCTCCTCCTCCGCTCTGCAGGC	Promoter (<=1kb)	1	237042184	237833988	791805	1	6262	ENST00000366574.7	0	ENSG00000198626	RYR2	ryanodine receptor 2	NA	NA	0	0.292615	0.704072	21.8013	0.484642	0.84435	20.7639	0.456779	0.828721	20.8013	0.501742	0.806744	-20.7273	0.146673	0.781216	21.8013
chr1	237075849	237076025	177	chr1:237075849-237076025	3	GTTACCTCTGCAGACTTAAGTGTCCCTGTCTGACAGCTTTGAAGAGAGCAGTGGTTCTCCCAGCACGCAGCTGGAGATCTGAGAACGGGCAGACTGCCTCCTCAAGTGGGTCCCTGACCCCTGACCCCCGAGCAGCCTAACTGGGAGGCACCCCCCAGCAGGGGCACACTGACACCT	Intron (ENST00000366574.7/6262, intron 1 of 104)	1	237042184	237833988	791805	1	6262	ENST00000366574.7	33665	ENSG00000198626	RYR2	ryanodine receptor 2	0.293206	0.603103	1.076	0.347973	0.704072	-0.137502	0.646749	0.845217	0.609416	0.342551	0.724777	-0.354145	0.161613	0.681513	1.13728	0.401372	0.781216	0.106861
chr1	237076025	237076201	177	chr1:237076025-237076201	2	TCACACGGCAGGGTATTCCAACAGACCTGCAGCTGAGGGTCCTGTCTGTTAGAAGGAAAACTAACAACCAGAAAGGACATCTACACCGAAAACCCATCTGTACATCACCATCATCAAAGACCAAAAGTAGATAAAACCACAAAGATGGGGAAAAAACAGAACAGAAAAACTGGAAAC	Intron (ENST00000366574.7/6262, intron 1 of 104)	1	237042184	237833988	791805	1	6262	ENST00000366574.7	33841	ENSG00000198626	RYR2	ryanodine receptor 2	0.293206	0.603103	1.15119	0.347973	0.704072	-0.227327	0.646749	0.845217	0.663099	0.342551	0.724777	-0.44397	0.161613	0.681513	1.21247	0.401372	0.781216	0.0479588
chr1	238832231	238832389	159	chr1:238832231-238832389	0	GCTGCAGAAATTTGCATGAGTAAAGAAGAACTGAATGTTAATACCCAAGACAATGGGGAAAATGCCTCCAGGGCATTTTAGAGACCTTCACAGCAGCCCCTCCCATCACAGACCCAAAGGCCTAGGAGGGAAAAATGTTTTTGTGAGCCAGGCCCAGGG	Distal Intergenic	1	238842767	238848115	5349	1	105373222	ENST00000660627.1	-10378	NA	LOC105373222	uncharacterized LOC105373222	0.979795	1	-0.477241	0.692012	0.951591	-0.963298	0.484628	0.84435	-1.44072	0.61507	0.879899	-0.852059	0.525687	0.806744	0.45237	0.785469	0.928082	-0.671411
chr1	239628589	239628770	182	chr1:239628589-239628770	2	GAGTTTCCAGTTTTTCTGTTCTGTTTTTCCCCATCTTTGTGGTTTTATCTACTTTTGGTCTTTGATGATGGTGATGTACAGATGGGTTTTCGGTGTGGATGTCCTTTCTGTTTGTTAGTTTTCCTTCTAACAGACAGGACCCTCAGCTGCAGGTCTGTTGGAATACCCTGCCGTGTGAGGTG	Promoter (<=1kb)	1	239629073	239915452	286380	1	1131	ENST00000255380.8	-303	ENSG00000133019	CHRM3	cholinergic receptor muscarinic 3	0.939438	1	2.9667	0.901293	0.951591	-2.66204	0.846186	0.971115	2.10616	0.900429	0.940684	-2.98788	0.731233	0.864372	3.26351	0.718781	0.88524	-1.9013
chr1	239628770	239628951	182	chr1:239628770-239628951	2	GTCAGTGTGCCCCTGCTGGGGGGTGCCTCCCAGTTAGGCTGCTCGGGGGTCAGGGGTCAGGGACCCACTTGAGGAGGCAGTCTGCCCGTTCTCAGATCTCCAGCTGTGTGCTGGGAGAACCACTGCTCTCTTCAAAGCTGTCAGACAGGGACACTTAAGTCTGCAGAGGTTACTGCTGTCTT	Promoter (<=1kb)	1	239629073	239915452	286380	1	1131	ENST00000255380.8	-122	ENSG00000133019	CHRM3	cholinergic receptor muscarinic 3	0.939438	1	3.10995	0.901293	0.951591	-2.80528	0.846186	0.971115	2.23998	0.900429	0.940684	-3.13112	0.731233	0.864372	3.40676	0.718781	0.88524	-2.03467
chr1	239653117	239653415	299	chr1:239653117-239653415	5	GAACTGGGATCAATTCCAAACACAACATGGACAAGTGGGGATGTATAGCCAAGGAGCCGCCTGGAGTCAGTAGATGGAAAATTCCTAAGAGGAGGCATCACGAGTAAGGGGGATTCCTAGGAAACAGATCTTCTTTCGGGATTCTAGCTGCAGGCAGTCCAGGGTGAGCAGATGTCATCTGGGAGATGATGAGGAGTGAGGAGTTTGATCAGACACAGAAGGGGATAAGATACTGAGGGTTGGGAATTCTGAATAAACCGACTTAGCAGGAATCTTTTTACAACCGAGTGATGCAGAGA	Intron (ENST00000468573.5/1131, intron 4 of 8)	1	239632251	239703649	71399	1	1131	ENST00000487470.1	20866	ENSG00000133019	CHRM3	cholinergic receptor muscarinic 3	1	1	-1.82037	0.205257	0.704072	-23.309	0.65379	0.845217	-2.78384	0.070489	0.576841	-23.309	0.649975	0.806744	-0.89076	0.350384	0.781216	-22.4402
chr1	240654326	240654478	153	chr1:240654326-240654478	3	CTGCAGAGTCGGAGGACAATATTCTCCACCTGACCCAATGCCATGGGGTGAACCTGGAAGGTGCCTGTGAAGCCTTCCTGGCATGCTCCACCTGCCATGTGCATGTGAGCGAAGACCTGGACCTTCTGCCTCCTCCCGAAGAGAGGGAAGACA	Exon (ENST00000442611.2/ENST00000442611.2, exon 1 of 1)	1	240489573	240612155	122583	2	64388	ENST00000318160.5	-42171	ENSG00000180875	GREM2	gremlin 2, DAN family BMP antagonist	0.353872	0.603103	-21.4648	0.389207	0.704072	-22.3124	0.934592	0.999197	1.41848	0.889459	0.940684	0.294514	0.22065	0.681513	-23.1116	0.244564	0.781216	-23.0412
chr1	240762604	240762757	154	chr1:240762604-240762757	13	CCCCAGGCAATGAGGGCTTAGCACCCGGGCCGGCGGCTGCGGAGGATGTACTGGGTCCCCCAGCAGTGCCGGCCCACCGGCGCTGTGCTCTATTTCTCGCCGGGCCTTAGCTGCCTTCCCGCGGGGCAGGGCTCGGGACCTGCAGCCCGCCATG	Distal Intergenic	1	240739131	240743904	4774	2	100506929	ENST00000431139.4	-18700	NA	LOC100506929	uncharacterized LOC100506929	0.646376	0.849312	0.581836	0.280953	0.704072	0.145555	0.988124	1	-0.332972	0.130581	0.682531	-0.794772	0.366204	0.768712	1.44256	0.478816	0.781216	0.959687
chr1	240762757	240762910	154	chr1:240762757-240762910	12	GCCTCAGCCTTCCCCGACCTCCGTGGGCTCCTGTGCAGCCCAAGCCTCCCCGAGGAGCGCCGCCCCCTGCTCCACGGCGCCCAGTCCCATCACCACCCAAGGGCTGAGGAGTGCGGACGCACGCCGCGGGACTGGCAGGCAGCTCCACCTGCAG	Distal Intergenic	1	240739131	240743904	4774	2	100506929	ENST00000431139.4	-18853	NA	LOC100506929	uncharacterized LOC100506929	0.646376	0.849312	0.581836	0.280953	0.704072	0.145555	0.988124	1	-0.332972	0.130581	0.682531	-0.794772	0.366204	0.768712	1.44256	0.478816	0.781216	0.959687
chr1	240829455	240829598	144	chr1:240829455-240829598	4	TCTGCAGCCGGAGTTCACAACCACTGATGTAGGTGTAACAAAGACAAGGTTTTTAAAACATTAAAGGATCGAGTTTTCACTTTCCATTCGATTTCTATTTCTTTGCAGCCTTCCATCCCTAAGCCTGAGCCATAACGGAAGGGA	Promoter (1-2kb)	1	240775521	240827809	52289	2	6000	ENST00000687918.1	-1646	ENSG00000182901	RGS7	regulator of G protein signaling 7	0.353872	0.603103	-21.8769	0.461936	0.75726	2.3934	0.690137	0.845217	1.05693	0.889459	0.940684	1.3934	0.325495	0.704731	-23.2293	0.183554	0.781216	3.26216
chr1	240829598	240829741	144	chr1:240829598-240829741	0	AAGGCAGTAAAATTCTTTAAACTCCTATCAACATATCAGGAGCCAAGCACAGTGCCAGGTGCAGTGGCTTATGCCTGTAATCTCAGCATTTGGAGAGGCTGAGGTGGGAGGATCACTTGCTTTGAGGAGTTTGAGGCTGCAGTG	Promoter (1-2kb)	1	240775521	240827809	52289	2	6000	ENST00000687918.1	-1789	ENSG00000182901	RGS7	regulator of G protein signaling 7	0.353872	0.603103	-21.8769	0.461936	0.75726	2.3934	0.690137	0.845217	1.05693	0.889459	0.940684	1.3934	0.325495	0.704731	-23.2293	0.183554	0.781216	3.26216
chr1	241855406	241855553	148	chr1:241855406-241855553	4	TGTTTACAAACCTTGAGCTAGATACAGAGTGCCGATTGGTGTATTTACAATCCCTGAGCTAGACGTAAAGATTCTCCAAGGCCCCACCAGACTCAGGAGCCCAGCTGGCTTCACCCAGTGGATCCCGCACGGGGCTGCAGGTGAAGCT	Intron (ENST00000366548.8/9156, intron 6 of 15)	1	241850492	241860704	10213	1	9156	ENST00000469419.1	4914	ENSG00000174371	EXO1	exonuclease 1	NA	NA	0	NA	NA	0	0.484642	0.84435	20.7085	0.456779	0.828721	20.746	0.501742	0.806744	-20.672	0.523999	0.781216	-20.6016
chr1	241855553	241855700	148	chr1:241855553-241855700	10	TGCCTGTCAGTCCTGCGCCGTCTGCCCGCACTCCTCAGCCCTTGGGTGGTGGATGAGACTGGGCGCCGTGGAGCAGGGGGTGGTGCTCGTTGGGGAGGCTCGGGCGGCACAGGAGCCCACGGAGGGGGTGGGAGGCTCAGGCATGGCG	Intron (ENST00000366548.8/9156, intron 6 of 15)	1	241850492	241860704	10213	1	9156	ENST00000469419.1	5061	ENSG00000174371	EXO1	exonuclease 1	NA	NA	0	NA	NA	0	0.484642	0.84435	20.7085	0.456779	0.828721	20.746	0.501742	0.806744	-20.672	0.523999	0.781216	-20.6016
chr1	241855700	241855847	148	chr1:241855700-241855847	11	GGGCTGCAGTCCCGAGTCCTGCCCCGCAGGAAGGCAGCTAAGGCCCCGCGAGAAATAGAGCGCAGCGCCGGTGGGCCGGCACTGCTGGGGGACCCAGTACATCCTCCGCAGCCGCTGGCCCGGGTGCTAAGCCCTCATTGCCTGGGGC	Intron (ENST00000366548.8/9156, intron 6 of 15)	1	241850492	241860704	10213	1	9156	ENST00000469419.1	5208	ENSG00000174371	EXO1	exonuclease 1	NA	NA	0	NA	NA	0	0.484642	0.84435	20.7085	0.456779	0.828721	20.746	0.501742	0.806744	-20.672	0.523999	0.781216	-20.6016
chr1	241908099	241908387	289	chr1:241908099-241908387	4	CTCTTAGTTCAGAAAGACCCCTGTGTGAGGAGCACACGTGTGACCTTCTGGAGCGTCTGGGCACTCCTCTCTGCTACAGAACTACAAATGCTGTTTGGAGACCAGGAGCAGGTGAGTGAGGACAAGACGGAGGTGCTGCACATGAGGCTGCAGGCCTAGGGAGGAGGTGAGGATGGTCCAGGAAGCAGGGATGTGGAGAAGCCCCCTGAAAGAGCTGCACAGAATCACAAGGCAGCGAGGACACAGAAACCACTCTAGGTATGACAATCAGGGGCATTTAATGCAGGGA	Distal Intergenic	1	241885357	241895148	9792	1	9156	ENST00000518741.1	22742	ENSG00000174371	EXO1	exonuclease 1	0.983078	1	-0.561906	0.0347347	0.704072	-25.3821	0.578217	0.845217	-1.42195	0.0481279	0.576841	-2.67754	0.622553	0.806744	0.300135	0.063288	0.781216	-24.8448
chr1	241971639	241971781	143	chr1:241971639-241971781	4	CTGCAGCATCAAACTCCTGGGCTAAAGCGATCCTCCTGCATCAGCCTTCCGATTAGCTGGGATTACAGGTGCACACCGCCACGTCTGGCTAATTTATTATATTTTTGTAGAGATAGGGTCTTGCCATGTTGCCCAGGCTAGCC	Distal Intergenic	1	241957767	241959062	1296	1	441925	ENST00000419583.2	13872	ENSG00000196289	BECN2	beclin 2	0.152084	0.603103	25.2305	0.113079	0.704072	-25.6085	0.136921	0.726107	25.3164	0.122775	0.682531	-2.10167	0.479486	0.806744	0.902722	0.173516	0.781216	-25.2095
chr1	242050648	242050826	179	chr1:242050648-242050826	2	GAGTTTCCAGTTTTTCTGTTCTGTTTTTTCCCCATCTTTGTGGTTTTATCTACTTTTGGTCTTTGATGATGGTGATGTACAGATGGGTTTTCGGTGTGGATGTCCTTTCTGTTTGTTAGTTTTCCTTCTAACAGACAGGACCCTCAGCTGCAGGTCTGTTGGAATACCCTGCCGTGTGA	Distal Intergenic	1	241995490	241999098	3609	2	440738	ENST00000357246.4	-51550	ENSG00000197769	MAP1LC3C	microtubule associated protein 1 light chain 3 gamma	0.222733	0.603103	0.732919	0.512977	0.799964	-0.136157	0.434932	0.84435	0.537187	0.81879	0.939494	-0.0954735	0.232641	0.690204	0.583837	0.415941	0.781216	-0.111135
chr1	242050826	242051004	179	chr1:242050826-242051004	3	AGGTGTCAGTGTGCCCCTGCTGGGGGGTGCCTCCCAGTTAGGCTGCTCGGGGGTCAGGGGTCAGGGACCCACTTGAGGAGGCAGTCTGCCCGTTCTCAGATCTCCAGCTGCGTGCTGGGAGAACCACTGCTCTCTTCAAAGCTGTCAGACAGGGACACTTAAGTCTGCAGAGGTTACTG	Distal Intergenic	1	241995490	241999098	3609	2	440738	ENST00000357246.4	-51728	ENSG00000197769	MAP1LC3C	microtubule associated protein 1 light chain 3 gamma	0.222733	0.603103	0.618305	0.512977	0.799964	-0.216108	0.434932	0.84435	0.422574	0.81879	0.939494	-0.175424	0.232641	0.690204	0.528436	0.415941	0.781216	-0.156229
chr1	242079935	242080086	152	chr1:242079935-242080086	0	CACAGACCAACAAAAATTTTTTCCCTGAGGGGTATTTTATCACTGACATTGTTTAGAACTGCTGGTAGATGGTGATAGTAAGAAGTGGGTGACTTTTAGTGATTTTACTGTTTTTAAAATTCTCACCATAAAATGTGCTCCTATTGCCTGCA	Distal Intergenic	1	241995490	241999098	3609	2	440738	ENST00000357246.4	-80837	ENSG00000197769	MAP1LC3C	microtubule associated protein 1 light chain 3 gamma	1	1	-0.482251	0.389207	0.704072	-23.7318	0.65379	0.845217	-1.44573	0.753887	0.879899	-0.171725	0.649975	0.806744	0.447359	0.350384	0.781216	-24.1657
chr1	242494094	242494146	53	chr1:242494094-242494146	0	CCCTCTCCTCCCCTCTCCTCCCCTCTCCTCCCCTCTCCTCCCCTCTCCTCTCT	Intron (ENST00000536534.7/200150, intron 1 of 9)	1	242124418	242524671	400254	2	200150	ENST00000467561.5	30525	ENSG00000180287	PLD5	phospholipase D family member 5	0.329114	0.603103	23.3547	0.389207	0.704072	-23.1531	0.484642	0.84435	22.3912	0.210736	0.682531	-23.1531	0.167938	0.681513	23.3547	0.523999	0.781216	-22.2843
chr1	242494364	242494575	212	chr1:242494364-242494575	2	CTGCAGCAGCCTCCCTCTGCTTTTGGATAAAGGCTTTAAGCTGATGGTTTATCCCAGTTTCTGCAGACATGGTTTTCCCATCACTTCTGCCATCCCATCCCCTCTTCCTGCTCTAAGTCTGTCCCTACGGCCTGGATCACTGACTCTCACTGTGTACCTCCTGGAGCACACATCTCCCCGCCTCTAGCCAACATATCTACCTCTGCACCAGG	Intron (ENST00000536534.7/200150, intron 1 of 9)	1	242124418	242524671	400254	2	200150	ENST00000467561.5	30096	ENSG00000180287	PLD5	phospholipase D family member 5	0.329114	0.603103	24.0068	0.389207	0.704072	-23.8051	0.484642	0.84435	23.0433	0.210736	0.682531	-23.8051	0.167938	0.681513	24.0068	0.523999	0.781216	-22.9364
chr1	242819926	242820097	172	chr1:242819926-242820097	3	CCAGGAGTTGGAGATCAGCCTAGGCAACTTAGCAAGACCTCGTCTCCCAAATATTTTATAATTAGCCAGGCATGGTGGCATGTGCCTGTAGTTCCAACTATTTGGGAGGCTGAGGCAGGAGGATCACTGGAGCCAAGGAGGTCGACGCTGCAGTGAGCTTTGATCACATCAC	Distal Intergenic	1	243087710	243097299	9590	2	731275	ENST00000417964.2	277202	ENSG00000214837	LINC01347	long intergenic non-protein coding RNA 1347	0.288161	0.603103	0.321444	0.767997	0.951591	0.41983	0.613382	0.845217	-0.0801121	0.633159	0.879899	-0.0495681	0.133927	0.681513	0.603278	0.898325	0.986213	0.712056
chr1	242820097	242820268	172	chr1:242820097-242820268	1	CTGCACTCCAGCCTGGGTGACAGAGTAGGACTCCGCCCTAAATTAAAATAAAATAAAGTAATAGAAATAAAAAAGATAAAAATGAGCAGAGGGAACAAGTGGCAATGGTTCTCTGCTCTGAAGACATTTTTACTGGTCTCAGGAACTGAGCAGTTTGGATATTAACTGCCCC	Distal Intergenic	1	243087710	243097299	9590	2	731275	ENST00000417964.2	277031	ENSG00000214837	LINC01347	long intergenic non-protein coding RNA 1347	0.288161	0.603103	0.321444	0.767997	0.951591	0.41983	0.613382	0.845217	-0.0801121	0.633159	0.879899	-0.0495681	0.133927	0.681513	0.603278	0.898325	0.986213	0.712056
chr1	243051127	243051417	291	chr1:243051127-243051417	3	GAGAGTGGGGACAACTCTGGGGAGGAGCCAGAGGGCAACAAGGGCTTTGGTGGGAAGGTATTTGCACCTGTCATTCCTTCCTCCTTTACTCCTGCCGCCCCTTGCTGGATCCTGAGCCCCCAGGGTCCCCCGATCCACCTGCAGCTTTTGGCAAAGTCTATGGTCCCACCCTGTCCTCCTCCAACACATACTTGGATGCTTCCTCCTCAACCTTGGCACCCACCTCCTTCTTACTGGGCCCAGGAGCCTTCAAAGCCCAGGAGTCTGGTCAAGGCAGCAGAGCGGGCCCCC	Exon (ENST00000611420.1/ENST00000611420.1, exon 1 of 1)	1	243087710	243097299	9590	2	731275	ENST00000417964.2	45882	ENSG00000214837	LINC01347	long intergenic non-protein coding RNA 1347	1	1	-1.18205	0.113079	0.704072	-23.6467	0.720045	0.863081	-0.305042	0.114587	0.682531	-2.9748	0.689972	0.838465	-1.31143	0.173516	0.781216	-23.0532
chr1	243806426	243806568	143	chr1:243806426-243806568	0	CTGCAGTGCTTTGCAAGCATCAAAGTTGAAAGTGCTAGCTTTGTGAATACCAAAAGCATTAACTGACTACACCAGTCATTTAGCATTTTGGTTTCCTGCCACAAATATACTTCCATCTTTACATGCATATGTGTCTTATCTTC	Intron (ENST00000336199.9/10000, intron 1 of 13)	1	243664772	243814682	149911	2	10000	ENST00000463991.5	8114	ENSG00000117020	AKT3	AKT serine/threonine kinase 3	0.0884075	0.603103	-25.5743	0.945411	0.951591	-0.395652	0.0920896	0.726107	-2.40641	0.639663	0.879899	0.435178	0.152032	0.681513	-25.078	0.757708	0.912001	-0.908689
chr1	244867190	244867332	143	chr1:244867190-244867332	4	TTCGAAACCAGCCTGAGGAACACAGTGAGACTCCATCTCCACAAAAAATTAAAATTAGGTGGCTGTGGTGGTACGCCTGTAGTCCGAGCTACTCAAGGGGCTGAGGTAGCAGGATCACTTGACCCCCGGCAGTCAAGGCTGCA	Promoter (2-3kb)	1	244850297	244864560	14264	2	3192	ENST00000444376.7	-2630	ENSG00000153187	HNRNPU	heterogeneous nuclear ribonucleoprotein U	0.250097	0.603103	-0.649394	0.850026	0.951591	0.279424	0.0870385	0.726107	-0.775218	0.763255	0.888485	0.314257	0.695622	0.844886	-0.283371	0.900974	0.986213	0.111406
chr1	246436984	246437159	176	chr1:246436984-246437159	6	CCACCTCCCGGGTTCAAGCGATTCTCCTGCCTCAGCTTCCCAAGTAGCTGGGATTACAGGCACCCGCCACCACACCCAGCTAATTTTTTGTATTTATTAGAGACAAGGTTTCACCACGTTGGTCAGGCTGGTCTCGAACTCCTGACCTCGGGTGATCCACTCACCTCAGCCTCCCA	Intron (ENST00000490107.6/64754, intron 1 of 11)	1	245749342	246417409	668068	2	64754	ENST00000630181.2	-19575	ENSG00000185420	SMYD3	SET and MYND domain containing 3	0.353872	0.603103	-24.0037	0.891077	0.951591	1.32121	0.690137	0.845217	0.152486	0.753887	0.879899	0.321206	0.325495	0.704731	-24.6896	0.561579	0.781216	2.18996
chr1	246437159	246437334	176	chr1:246437159-246437334	0	ACAGTGCTGGGATTTCAGAGTTTCTTACTGTATCTGCAGCAGCTGCTCTTCTCCTAGAGACAAAGAATGCTTTCTCAGGAATCTCACCTGTCTTTTTGGGAGCACCTGGTAGAGTTTTTGGAGAAAAAGCCTACAGGTGGGTATGAACTCCCCTCATCCACAGTTCCCAGGGTCTT	Intron (ENST00000490107.6/64754, intron 1 of 11)	1	245749342	246417409	668068	2	64754	ENST00000630181.2	-19750	ENSG00000185420	SMYD3	SET and MYND domain containing 3	0.353872	0.603103	-24.0037	0.891077	0.951591	1.32121	0.690137	0.845217	0.152486	0.753887	0.879899	0.321206	0.325495	0.704731	-24.6896	0.561579	0.781216	2.18996
chr1	247687759	247687935	177	chr1:247687759-247687935	3	GTAACCTCTGCAGACTTAAGTGTCCCTGTCTGACAGCTTTGAAGAGAGCAGTGGTTCTCCCAGCACGCAGCTGGAGATCTGAGAACGGGCAGACTGCCTCCTCAAGTGGGTCCCTGACCCCTGACCCCCGAGCAGCCTAACTGGGAGGCACCCCCCAGCAGGGGCACACTGACACCT	Intron (ENST00000655877.1/ENST00000655877.1, intron 1 of 1)	1	247670812	247679739	8928	2	441933	ENST00000642119.1	-8020	ENSG00000197437	OR13G1	olfactory receptor family 13 subfamily G member 1	0.319709	0.603103	0.826008	0.608658	0.916218	0.0697359	0.595303	0.845217	0.715449	0.6615	0.879899	-0.137297	0.306372	0.704731	0.516183	0.68449	0.855151	0.229031
chr1	247687935	247688111	177	chr1:247687935-247688111	2	TCACACGGCAGGGTATTCCAACAGACCTGCAGCTGAGGGTCCTGTCTGTTAGAAGGAAAACTAACAACCAGAAAGGACATCTACACCGAAAACCCATCTGTACATCACCATCATCAAAGACCAAAAGTAGATAAAACCACAAAGATGGGGAAAAAACAGAACAGAAAAACTGGAAAC	Intron (ENST00000655877.1/ENST00000655877.1, intron 1 of 1)	1	247670812	247679739	8928	2	441933	ENST00000642119.1	-8196	ENSG00000197437	OR13G1	olfactory receptor family 13 subfamily G member 1	0.452308	0.741191	0.764931	0.608658	0.916218	0.0697359	0.703334	0.853916	0.681953	0.570294	0.879899	-0.179439	0.44613	0.806744	0.455106	0.759793	0.914105	0.267698
chr1	247893430	247893583	154	chr1:247893430-247893583	1	TTTTTTCCCCATCTTTGTGGTTTTATCTACTTTTGGTCTTTGATGATGGTGATGTACAGATGGGTTTTTGGTGTGGATGTCCTTTCTGTTTGTTAGTTTTCCTTCTAACAGACAGGACCCTCAGCTGCAGGTCTGTTGGAATACCCTGCCGTGT	Promoter (2-3kb)	1	247895587	247896531	945	1	343171	ENST00000360358.3	-2004	ENSG00000238243	OR2W3	olfactory receptor family 2 subfamily W member 3	0.035551	0.603103	24.6455	0.640414	0.941196	-1.01027	0.0424211	0.726107	24.006	0.676856	0.879899	-2.01027	0.139755	0.681513	2.98999	0.159445	0.781216	-0.141519
chr1	247893583	247893736	154	chr1:247893583-247893736	2	TGAGGTGTCAGTGTGCCCCTGCTGGGGGGTGCCTCCCAGTTAGGCTGCTCGGGGGTCAGGGGTCAGGGACCCACTTGAGGAGGCAGTCTGCCCGTTCTCAGATCTCCAGCTGCATGCTGGGAGAACCACTGCTCTCTTCAAAGCTGTCAGACAG	Promoter (1-2kb)	1	247895587	247896531	945	1	343171	ENST00000360358.3	-1851	ENSG00000238243	OR2W3	olfactory receptor family 2 subfamily W member 3	0.035551	0.603103	24.6455	0.640414	0.941196	-1.01027	0.0424211	0.726107	24.006	0.676856	0.879899	-2.01027	0.139755	0.681513	2.98999	0.159445	0.781216	-0.141519
chr1	247893736	247893889	154	chr1:247893736-247893889	1	GGGACATTTAAGTCTGCAGAGGTTACTGCTGTCTTTTTGTTTGTCTGTGCCCTGCCCCCAGAGGTGGAGCCTACAGAGGCAGGCAGGCCTCCTTGAGCTGTGGTGGGCTCCACCCAGTTCGAGCTTCCAGGCTGCTTTGTTTACCTAAGCAAGC	Promoter (1-2kb)	1	247895587	247896531	945	1	343171	ENST00000360358.3	-1698	ENSG00000238243	OR2W3	olfactory receptor family 2 subfamily W member 3	0.035551	0.603103	24.6455	0.640414	0.941196	-1.01027	0.0424211	0.726107	24.006	0.676856	0.879899	-2.01027	0.139755	0.681513	2.98999	0.159445	0.781216	-0.141519
chr1	248762141	248762314	174	chr1:248762141-248762314	1	CCCACCACAGCTCAAGGAGGCCTGCCTGCCTCTGTAGGCTCCACCTCTGGGGGCAGGGCACAGACAAACAAAAAGACAGCAGTAACCTCTGCAGGCTTAAATGTCCCTGTCTGACAGCTTTGAGGAGAGCAGTGGTTCTCCCAGCACACAGCTGGAGATCTGAGAACGGGCAGA	Distal Intergenic	1	248739415	248755759	16345	2	646627	ENST00000590317.4	-6382	ENSG00000259823	LYPD8	LY6/PLAUR domain containing 8	0.329114	0.603103	23.3603	0.389207	0.704072	-23.1586	0.484642	0.84435	22.3968	0.210736	0.682531	-23.1586	0.167938	0.681513	23.3603	0.523999	0.781216	-22.2899
chr1	248762314	248762487	174	chr1:248762314-248762487	8	ACTGCCTCCTCAAGTGGGTCCCTGACCCCTGACCCTTGAGCAGCCTAACTGGGAGGCACCCCTCAGTGGGGGCAGACTGACACCTCACACGGCCGGGTACTCCTCTGAGACAAAACTTCCCGAGGAACGATCAGACAGCAGCATTCACGGATCACGAAAATCCGCGGTTCTGCA	Distal Intergenic	1	248739415	248755759	16345	2	646627	ENST00000590317.4	-6555	ENSG00000259823	LYPD8	LY6/PLAUR domain containing 8	0.329114	0.603103	23.3603	0.389207	0.704072	-23.1586	0.484642	0.84435	22.3968	0.210736	0.682531	-23.1586	0.167938	0.681513	23.3603	0.523999	0.781216	-22.2899
chr1	248762487	248762660	174	chr1:248762487-248762660	1	AGACACCGCTGCTGATACCCAGGCAAACAGGGTCTGGAGTGGACCTCTAGCAAACTCCAACAGACCTGCAGCTGAGGGTCCTGTCTGTTAGAAGGAAAACTAACAAACAGAAAGGAAATCCACACCAAAAACCCATCTGTACATCACCATCATCAAAGACCAAAAGTAGATAAA	Distal Intergenic	1	248739415	248755759	16345	2	646627	ENST00000590317.4	-6728	ENSG00000259823	LYPD8	LY6/PLAUR domain containing 8	0.329114	0.603103	23.3603	0.389207	0.704072	-23.1586	0.484642	0.84435	22.3968	0.210736	0.682531	-23.1586	0.167938	0.681513	23.3603	0.523999	0.781216	-22.2899
chr1	248811896	248812195	300	chr1:248811896-248812195	29	TCGGCTACAGGCTGACGCTGCGCTGGTGCCGACCCCCACGGGCTCCGCCGTCGCTGCCCCGGCGCCCTCCACTCCGCGTTCCCAGCTCTTGGCCGTCCAGACTGACGTGGTCCGAGAGGCCTCGCAAGTGCTCCACGGAGTCGCACTTCTGCAGGTCTGAAGCCACCGTGCGCAGGCTCAGCAGACTCAGGGTATCGGTGTCGGGGGCGGGGCCGGGCCCCAGGCTGCTGCCCTCCTCCAGCCCCGCACCCTCGGCCCCCTCAATCCCGCTGTCTCCGTCCTCCATGTCCTCGGGTCCTG	Promoter (1-2kb)	1	248810446	248814173	3728	2	80851	ENST00000484202.2	1978	ENSG00000175137	SH3BP5L	SH3 binding domain protein 5 like	0.152084	0.603103	25.5538	0.205257	0.704072	-25.3522	0.306975	0.726107	24.5903	0.070489	0.576841	-25.3522	0.0464076	0.476039	25.5538	0.350384	0.781216	-24.4834
chr1	248812224	248812522	299	chr1:248812224-248812522	12	AGGGCCCAGGGGGTGGGGAGGCAGACCCCCGCGGCGCCGTGCGTGAATCTGCTCGCTGATCTGCTCCAGGTTACGAAGGGCCACGGAGTAGCGCGTCTTGGCCTGAGCTACCTGCTGCTCCAGTTCTGTCACCTTGGCCTTGTGCTCCTGCAGAGGGCAGAGCAGAGCAAGGCGACCCATGGGGCACGTCTCCACCTTCCTCAGCACTCTGCACTGAGGTCTGAGGGCCTGCTCTCCCAGAATACCTGGACAGCTGGCTCAGCATCCACCACAGACCCACAACAGCCTTCCCTGCTCCA	Promoter (1-2kb)	1	248810446	248814173	3728	2	80851	ENST00000484202.2	1651	ENSG00000175137	SH3BP5L	SH3 binding domain protein 5 like	0.152084	0.603103	25.5538	0.205257	0.704072	-25.3522	0.306975	0.726107	24.5903	0.070489	0.576841	-25.3522	0.0464076	0.476039	25.5538	0.350384	0.781216	-24.4834
chr10	11831	11986	156	chr10:11831-11986	13	TCCCTGCAGTCCCTCCCTGGCGGCTGCGCAGCCGTCCCACGACAGGGGCCATAAACTCTCCAGAGCGGAAAGCCGCACCCTGGTGGCCCGGCCCCGCGCCCAGACCTGGCGGCCGCTGGCACCTGACCCGCTGCATGGGTCTCCAGGGAGCTCGCT	Distal Intergenic	10	47494	49269	1776	2	347688	ENST00000562809.1	37283	ENSG00000261456	TUBB8	tubulin beta 8 class VIII	0.972134	1	0.719172	0.205257	0.704072	-24.7855	0.690137	0.845217	-0.244302	0.070489	0.576841	-24.7855	0.614107	0.806744	1.64878	0.350384	0.781216	-23.9168
chr10	11986	12141	156	chr10:11986-12141	7	TGCCCACCCGGCGCTGCAGGCTCGGCTCCCTCGTACACTCTCTGGTAGGTGCTAGGGACGACCCTATGGGCCAGCTTGCCATGCCCAGTCCCCAGGCCGCACCCACCCTGGCTCCCTGGGCTAGGGGACTGGCTCCTCCTGTGAGTCGTGGGTCTG	Distal Intergenic	10	47494	49269	1776	2	347688	ENST00000562809.1	37128	ENSG00000261456	TUBB8	tubulin beta 8 class VIII	0.972134	1	0.719172	0.205257	0.704072	-24.7855	0.690137	0.845217	-0.244302	0.070489	0.576841	-24.7855	0.614107	0.806744	1.64878	0.350384	0.781216	-23.9168
chr10	48560	48701	142	chr10:48560-48701	9	GATTTTGAGCTGCCCTGGCTAAGGAGCCGCACCCCAGTCCTCGCCCGCAGCTCACCGAAGATGAAGTTGTCTGGCCTGAAGACCTGCCCGAAGGGCCCCGAGCGCACAGAGTCCATGGTGCCCGGCTCCAGATCCACGAGCA	Promoter (<=1kb)	10	47494	49269	1776	2	347688	ENST00000562809.1	568	ENSG00000261456	TUBB8	tubulin beta 8 class VIII	0.173089	0.603103	-25.1785	0.113079	0.704072	-25.5689	0.250573	0.726107	-2.09198	0.0248533	0.576841	-25.5689	0.22065	0.681513	-24.7706	0.244564	0.781216	-24.7002
chr10	48701	48842	142	chr10:48701-48842	14	ACAGCGCGGGGCACGTACCTGCCACCTGCGTGGGGCGGGAGGGCATGAGCGAGGGGAGGGCCGCGTTCCCAGGAGGGCGGTGGGGGAAGGACGGGGGTCTCACCGCTGGCCTCGTTGTAGTACACGTTGATGCGCTCCAGCT	Promoter (<=1kb)	10	47494	49269	1776	2	347688	ENST00000562809.1	427	ENSG00000261456	TUBB8	tubulin beta 8 class VIII	0.173089	0.603103	-25.1785	0.113079	0.704072	-25.5689	0.250573	0.726107	-2.09198	0.0248533	0.576841	-25.5689	0.22065	0.681513	-24.7706	0.244564	0.781216	-24.7002
chr10	635583	635761	179	chr10:635583-635761	7	TGGGCTGCAGCTGCGGGGAAGCAGCTGGTATGACACAGCAGGAGGCCGTGGCCAGCCCTGGAGGAGGGGCCCAGCTGCGGGCACTGCCCCAGGAGCCAGCATCCTGAGCCCCCGGGGAAGGCGGGAAATTGCCCCTGGGCACTGGGCGCTCAGGCTGGAGGTGGTGAGACCTCGAGGCC	Intron (ENST00000280886.12/22982, intron 1 of 36)	10	641689	641778	90	2	100847086	ENST00000578903.1	6017	ENSG00000263511	MIR5699	microRNA 5699	0.173089	0.603103	-24.2106	0.205257	0.704072	-24.0793	0.234049	0.726107	-4.57338	0.283631	0.682531	-4.40466	0.22065	0.681513	-23.3893	0.244564	0.781216	-23.3189
chr10	635761	635939	179	chr10:635761-635939	6	CCTGCAGTCAGGGAGGCGAGGGCAGAGGTGGCCAAACTGCAGCTCAGTGAAGGGTCTTGTCAGGAAAGACCCCCAGAGGCTGCCTCACCGGCCCAGGGGAAGTTACTTCCAGCCCAGAGGCTCAACGGGGTCCTCGGTGGTGACACTTAACCTTGTCCTCTGACAGACGATCATCGAGA	Intron (ENST00000280886.12/22982, intron 1 of 36)	10	641689	641778	90	2	100847086	ENST00000578903.1	5839	ENSG00000263511	MIR5699	microRNA 5699	0.173089	0.603103	-23.8182	0.205257	0.704072	-23.687	0.234049	0.726107	-4.18104	0.283631	0.682531	-4.01232	0.22065	0.681513	-23.0293	0.244564	0.781216	-22.9589
chr10	1115887	1116029	143	chr10:1115887-1116029	0	CTGCAGGCTGTGGGGCCTTGGAAGCACACCTGTGTCTCCTCTCAGTGTTACATCCCCTACCCATATGCCTGAAAGCTTGGTGGTTGTCTTTTTAATTAGATTACATTAGAGTACTTTAACAAAATGTTGTATGTATTCATGGG	Intron (ENST00000358220.5/22884, intron 11 of 13)	10	1123807	1129252	5446	1	22884	ENST00000482165.1	-7778	ENSG00000047056	WDR37	WD repeat domain 37	0.355727	0.605554	0.999525	0.921909	0.951591	-0.278951	0.411757	0.84435	0.735609	0.288562	0.682531	-0.997148	0.4321	0.806744	0.799395	0.452252	0.781216	0.392104
chr10	1416838	1417022	185	chr10:1416838-1417022	4	AGCGCCCAGCTTGCTGATGTGGGAGAGAGAAGGTGTCGGCCTGGGGCATGACCATCCACAGCTGAGAAGGGAGGTGGGTGCAGCACGGGTCCCCCTGAAACATTCCATGTGGAGACATCAGACCCCCCGGCTTAGGAGTTGTTACTGCAGGAGTGTTTGAGAAACTGTGTGGATGGTGGCCTGCA	Intron (ENST00000381312.6/105, intron 1 of 9)	10	1526637	1556984	30348	1	642394	ENST00000421697.2	-109615	ENSG00000205696	ADARB2-AS1	ADARB2 antisense RNA 1	0.152084	0.603103	24.1787	0.214871	0.704072	2.31872	0.0927196	0.726107	24.4626	0.407154	0.828721	1.51151	0.731233	0.864372	0.541496	0.145193	0.781216	2.51916
chr10	2987773	2987951	179	chr10:2987773-2987951	3	ACTGCAGGACCAACTGTCCCTGATGCGGGCACACAGGCCTGTGCTAGGACCCTCCCTGCTCCTGGCTCACAGATGCCACAGGCCAGGTCGAGGGTCAGCAGGCCCAGCAGAACTTCCCTCCCTGTGCCCCCCATGCCTCCCTCTTTTTCATTTGACCGCAGGCCATCTAGTCCATGTGT	Distal Intergenic	10	3066333	3101554	35222	1	5214	ENST00000607886.5	-78382	ENSG00000067057	PFKP	phosphofructokinase, platelet	0.972134	1	0.620932	0.113079	0.704072	-25.6746	0.967269	0.999197	-0.271562	0.0248533	0.576841	-25.6746	0.983438	1	1.44773	0.244564	0.781216	-24.8058
chr10	3096169	3096336	168	chr10:3096169-3096336	8	CATATTAACTAGTAAAATGCTGGGTGGCGGTTGACTTGGAAGCAGCGTCCGGGATAGCGCGTGCTCCAGGAATACTCTGAAAGCTGATGCCGTTAGGGGTGCATGGTTGACTCCTGGGCCTGAGACGGCCTCAGGATGCTGCAGCGGCCTTGGCATCCTCTTCAGCAG	Intron (ENST00000607886.5/5214, intron 2 of 3)	10	3104724	3137718	32995	1	5214	ENST00000415005.6	-8388	ENSG00000067057	PFKP	phosphofructokinase, platelet	NA	NA	0	0.292615	0.704072	22.437	0.306975	0.726107	23.4341	0.27781	0.682531	23.4716	0.325495	0.704731	-23.3976	0.596098	0.781216	-0.486461
chr10	3096336	3096503	168	chr10:3096336-3096503	7	GGGTGGCGGCCGGAACTGGCACCTTCCCCCCGGTCTCTTTATTTACCAAAAAACTGCATGCACAGAAATGACCGCAACAGCTCTGGGTGTGGGAATGTAGGAACTGTCTGTTTCAGTTTTGCCGGAGCCCCAGGTTTACGGCCGCTCTACATCCCAGTCCTCTCAGGG	Intron (ENST00000607886.5/5214, intron 2 of 3)	10	3104724	3137718	32995	1	5214	ENST00000415005.6	-8221	ENSG00000067057	PFKP	phosphofructokinase, platelet	NA	NA	0	0.292615	0.704072	22.437	0.306975	0.726107	23.4341	0.27781	0.682531	23.4716	0.325495	0.704731	-23.3976	0.596098	0.781216	-0.486461
chr10	3096503	3096670	168	chr10:3096503-3096670	5	GAGGTCCCGGTTTCTGCTGCAGTTCAGGCCCCATCATGGGTCATCTTTTCTCTCCTCCTGAGATGTGGGCTTGGAGGATGGGAGGTCGTGCCTCTAAGAAGGGTCCGTTTCACGGTGGCCCAGGCTACATGCCTGCTTCCTTGTTTCCTTGCCCCCCCGAGCTTCATG	Intron (ENST00000607886.5/5214, intron 2 of 3)	10	3104724	3137718	32995	1	5214	ENST00000415005.6	-8054	ENSG00000067057	PFKP	phosphofructokinase, platelet	NA	NA	0	0.292615	0.704072	22.437	0.306975	0.726107	23.4341	0.27781	0.682531	23.4716	0.325495	0.704731	-23.3976	0.596098	0.781216	-0.486461
chr10	3209173	3209332	160	chr10:3209173-3209332	0	CTGGCACCTGGTTGTGGGCTGAACTGTGTCCCCTGACTCATAAGTGAAAGCCCTAACCCCAGTGGGGTTTTATTTTGAGATAGGATCTTTAAATAGGTCATAAAGGGTAAATGAGGTCCTAGGAGTGGGGCTCTAATTCTCATAGGACTGCAGTCTTTGG	Intron (ENST00000663204.1/ENST00000663204.1, intron 1 of 2)	10	3137730	3172841	35112	2	10531	ENST00000451104.6	-36332	ENSG00000107959	PITRM1	pitrilysin metallopeptidase 1	0.152084	0.603103	23.7869	0.389207	0.704072	-22.5619	0.306975	0.726107	22.8235	0.753887	0.879899	-0.677969	0.0464076	0.476039	23.7869	0.350384	0.781216	-22.7165
chr10	3209332	3209491	160	chr10:3209332-3209491	6	GTCAAGAGATCGAGACCATCCTGGCCAACACAGTAAAACCCCCTCTCTACTAACAATAAAAAAAATTGCCGGGTGTGGTGGCACGTGCCTGTAGTCCCAGCTACTCGGGAGGCTGAGGCAGGAGAATTGCTTGAACCCGGGAGGCGGAGGCTGCAGTGAG	Intron (ENST00000663204.1/ENST00000663204.1, intron 1 of 2)	10	3137730	3172841	35112	2	10531	ENST00000451104.6	-36491	ENSG00000107959	PITRM1	pitrilysin metallopeptidase 1	0.152084	0.603103	23.7869	0.389207	0.704072	-22.5619	0.306975	0.726107	22.8235	0.753887	0.879899	-0.677969	0.0464076	0.476039	23.7869	0.350384	0.781216	-22.7165
chr10	3318343	3318495	153	chr10:3318343-3318495	12	TCCCGGGCCACGGACCTGTATTTCCAGGCAGCCTCTGCAGTGGGCAGCAGCGGGGTAGGTGGCCGAGTCTCCCGGGCCACGGACCTGTATTTCCCGGCAGCCTCTGTGTGGGCAGCAGCGGGATAGGCGGCCGAGTCTCCCGGGCCACGGACC	Distal Intergenic	10	3232264	3258897	26634	2	105376354	ENST00000669318.1	-59446	ENSG00000226762	LINC02668	long intergenic non-protein coding RNA 2668	0.329114	0.603103	24.2754	0.891077	0.951591	0.784691	0.484642	0.84435	23.3119	0.753887	0.879899	-0.215309	0.167938	0.681513	24.2754	0.561579	0.781216	1.65345
chr10	3318495	3318647	153	chr10:3318495-3318647	11	CTGTATTTCCCGGCAGCCTCTGTGTGGGCAGCAGCGGGATAGGCGGCCCAGTCTCCCGGGCCACGGACCTGTATTTCCCTGCAGCCTCTGTGTGGGCAGCAGCGGGATAGGCGGCCGAGTCTCCCGGGCCACGGACCTGTATTTCCCGGCAGC	Distal Intergenic	10	3232264	3258897	26634	2	105376354	ENST00000669318.1	-59598	ENSG00000226762	LINC02668	long intergenic non-protein coding RNA 2668	0.329114	0.603103	24.2754	0.891077	0.951591	0.784691	0.484642	0.84435	23.3119	0.753887	0.879899	-0.215309	0.167938	0.681513	24.2754	0.561579	0.781216	1.65345
chr10	3465485	3465663	179	chr10:3465485-3465663	3	AGCTGCAGTTCGGACCAGCCTCCTGTGGAAGCAAACATGCAGTCACTGGCCTCCAGAGTTTGGCTTAACACAGCTCTTCCTCTTCCTGAAAGTTACAGCAGGAAGCCGTTTTCAACGTTGCTTGTAAAACTGTAACTTCAGCATTACACAAACTTCAGGAATGAAAGCTCACCTGCAGG	Intron (ENST00000659295.1/101927880, intron 3 of 4)	10	3432519	3435758	3240	2	101927880	ENST00000685074.2	-29727	ENSG00000233321	LINC02669	long intergenic non-protein coding RNA 2669	1	1	-0.570284	0.205257	0.704072	-24.5025	0.65379	0.845217	-1.53376	0.070489	0.576841	-24.5025	0.649975	0.806744	0.359327	0.350384	0.781216	-23.6337
chr10	3654251	3654522	272	chr10:3654251-3654522	3	GCCTCCCGGGTGCAAAGGATTCTCCTGCCTCAGCCTCCCAAGTAGCTGGGATTATAGTCATGCACCACCACACCCAGCTAATTTTTGTATTTTTGGGAGAGATATGGTTTCACCATGTTGGCCAGGCTGGTCTTGAACTCCTGACCTCAGATGATCCACCTGCCTCAGTCTCCCAGAGTGCTGGGATTACAGGCGTGAGCCACAGCATCTGGCCAATGTGATCGCTTTTTCTTAAGACTATTGGTCATTCCTTTTTTTTTATTTTTCCTGCA	Distal Intergenic	10	3748966	3763712	14747	1	105376363	ENST00000661014.1	-94444	NA	LOC105376363	uncharacterized LOC105376363	0.915543	1	0.52827	0.547122	0.842618	-0.721017	0.456744	0.84435	-0.435204	0.130581	0.682531	-1.72102	0.350445	0.742895	1.45788	0.915997	0.986213	0.147738
chr10	3717653	3717825	173	chr10:3717653-3717825	6	ACATGGGCCCCAGAGAACAGGGCAAGGGACCCTGCAGGAGGAGGCCCCCCAAGGAGCCGAGAGAAGGACCCGAGAAGGAACCGGGACCTGAGAAGGAAAGGCTAAGGGAGAGATGGACTGAGAGGGCGTGGGGCCTCATCGCCACGTTAAGGATTTGGGTCTTCATCAAAAGA	Distal Intergenic	10	3748966	3763712	14747	1	105376363	ENST00000661014.1	-31141	NA	LOC105376363	uncharacterized LOC105376363	0.329114	0.603103	22.4889	0.205257	0.704072	-23.3187	0.306975	0.726107	22.5569	0.070489	0.576841	-23.3187	0.649975	0.806744	0.937755	0.350384	0.781216	-22.4499
chr10	3943152	3943303	152	chr10:3943152-3943303	3	CTGCAGAGTAGCCAGCCACATGCGAGAAAAATCTGAAGGAGACGAAAATGTTTCAGGAGAAAGGTACTGAGCAACCAAGGGGCTTAATGCTGCTAGGTCAAGCAGATTCAGAAGTGAGATGCCACTGCTGGCTCTGGAATCGTGGTGTCCCT	Distal Intergenic	10	3934519	3935813	1295	1	101927904	ENST00000432452.2	8633	NA	LINC02660	long intergenic non-protein coding RNA 2660	0.353872	0.603103	-21.1138	NA	NA	0	0.184235	0.726107	-21.1138	0.456779	0.828721	20.2582	0.501742	0.806744	-20.1842	0.523999	0.781216	-20.1138
chr10	3943409	3943709	301	chr10:3943409-3943709	12	AGCGCATGAAGATTAGCAAAGTCGTGGGACTGTGGAGAGAGGTGTGTGTGCAGTGACACTGGGTCTTCCTCTGTTTTGTTTAAATGACAGAGGTTACTAAGCCACGTGGGTTTGTAGATGGTGATGCTAGAGAAGAGGGACACTCATCCTGCAGAAGGGGAAGGAAAATTATCAGTCACGTTCTTGAGAAGACAAGGAGCGCTTGGCTGGGCTGAAAACGCAAGGGGAGGATAGGACCTTTGCCGAGGGCAGGACGACTTACAGTGACACGAGGAAGGCACGAGTGAGGGTAGCAACGCCG	Distal Intergenic	10	3934519	3935813	1295	1	101927904	ENST00000432452.2	8890	NA	LINC02660	long intergenic non-protein coding RNA 2660	0.353872	0.603103	-21.1138	NA	NA	0	0.184235	0.726107	-21.1138	0.456779	0.828721	20.2582	0.501742	0.806744	-20.1842	0.523999	0.781216	-20.1138
chr10	5224102	5224328	227	chr10:5224102-5224328	1	AAGTGAGAAGGGAAGTTTAGAGAAAAAAAAATAAAAAGAAACGAACAAAGCCTTCAAGAAATATGGGACTATATGAAAAGACCAATTCTATGTCTGATTGGTGTACCTGAAAGTGACTGGGAGAATGGAACCAAGCTGGAAAACCCTCTGCAGGATATTATCCAGGAGAACTTCCCCAATCTAGCATGGCAGGCCCACATTCAGATTCAGGAAATACAGAGAATGCC	Distal Intergenic	10	5196837	5218949	22113	1	1109	ENST00000263126.3	27265	ENSG00000198610	AKR1C4	aldo-keto reductase family 1 member C4	0.544211	0.803215	0.899649	0.945411	0.951591	-2.74948	0.967269	0.999197	-0.0638251	0.920918	0.940684	-1.1302	0.22065	0.681513	1.82926	0.983422	0.987893	-2.58733
chr10	5245778	5245949	172	chr10:5245778-5245949	4	CGAGGCTGGGGGAGGGGCGCCCGCCATTGCCCAGGCTTGCTTAGGTAAACAAAGCAGCCTGGAAGCTCGAACTGGGTGGAGCCCACCACAGCTCAAGGAGGCCTGCCTGCCTCTGTAGGCTCCACCTCTGGGGGTAGGGCACAGACAAACAAAAAGACAGCAGTAACCTCTG	Intron (ENST00000428920.2/ENST00000428920.2, intron 1 of 1)	10	5266033	5271236	5204	2	110806285	ENST00000449457.1	25287	ENSG00000224034	LINC02561	long intergenic non-protein coding RNA 2561	0.0733743	0.603103	22.3877	0.784959	0.951591	2.29428	0.0424211	0.726107	23.7039	0.609446	0.879899	1.64105	0.662852	0.819862	-0.946893	1	1	2.09196
chr10	5245949	5246120	172	chr10:5245949-5246120	3	GCAGACTTAAGTGTCCCTGTCTGACAGCTTTGAAGAGAGCAGTGGTTCTCCCAGCACGCAGCTGGAGATCTGAGAACGGGCAGACTGCATCCTCAAGTGGGTCCCTGACCCCTGACCCCCGAGCAGCCTAACTGGGAGGCACCCCCCAGCAGGGGCACACTGACACCTCACA	Intron (ENST00000428920.2/ENST00000428920.2, intron 1 of 1)	10	5266033	5271236	5204	2	110806285	ENST00000449457.1	25116	ENSG00000224034	LINC02561	long intergenic non-protein coding RNA 2561	0.0733743	0.603103	22.3877	0.784959	0.951591	2.29428	0.0424211	0.726107	23.7039	0.609446	0.879899	1.64105	0.662852	0.819862	-0.946893	1	1	2.09196
chr10	5246120	5246291	172	chr10:5246120-5246291	2	ACGGCAGGGTATTCCAACAGACCTGCAGCTGAGGGTCCTGTCTGTTAGAAGGAAAACTAACAACCAGAAAGGACATCTACACCGAAAACCCATCTGTACATCACCATCATCAAAGACCAAAAGTAGATAAAACCACAAAGATGGGGAAAAAACAGAACAGAAAAACTGGAAA	Intron (ENST00000428920.2/ENST00000428920.2, intron 1 of 1)	10	5266033	5271236	5204	2	110806285	ENST00000449457.1	24945	ENSG00000224034	LINC02561	long intergenic non-protein coding RNA 2561	0.0733743	0.603103	22.3877	0.784959	0.951591	2.29428	0.0424211	0.726107	23.7039	0.609446	0.879899	1.64105	0.662852	0.819862	-0.946893	1	1	2.09196
chr10	5328290	5328561	272	chr10:5328290-5328561	2	TGGATTCCAAGCCAATGTAGAGGGTGGTTGGTTGGATGAGCTGTAAGTTCCACGGATAAAGCTTTGTTGAAGGAGAATTGTTGAGAAGCACAACCATACAAAAATGAGAAGACTAGGAAGAGCTCCTGGGACAGACAGCCCTCTCTTTCTGCAGGTAGTCTGGCAGTGGGAGAGTCAGACAGTGGGCAGATTCCTTCAACCAGCCCATACCTCGTTCCTGGCCATGCAGAAAGCAAAATCATGGCCCCTGGATGGTTTTCTATTTATTGGCC	Distal Intergenic	10	5364966	5374692	9727	1	114131	ENST00000380433.5	-36405	ENSG00000178473	UCN3	urocortin 3	0.329114	0.603103	24.0828	0.389207	0.704072	-23.8811	0.484642	0.84435	23.1193	0.210736	0.682531	-23.8811	0.167938	0.681513	24.0828	0.523999	0.781216	-23.0124
chr10	5488366	5488664	299	chr10:5488366-5488664	7	TCTGGGCAGCAAGGCAGGAGCTCCCGGATCAGGAAAGTGCAGGCACACCATGTCTCTGAGTGGTGGGGTGGGGACAGAGGCTGGCAGGCCACCAACAGGGCAGCATCTGCTCCCAACCAAGGTGACTCAGACCTCGCCTTGTCCAACCTGCAGGCCTCCCAACAGTGGGGCTCTATAAGGCTGGCGTTCGCCTCCAGGGTTCTCCCCGACACTGGATGCCAACCTGCCCAGGGGCAGAAGGGAGGTTGGGCGTGGGGAGTGCCGGGTACAGTCAGAGTTGCCAGGACAGTTTGGAGCAG	Distal Intergenic	10	5498697	5499570	874	2	51806	ENST00000380332.5	10906	ENSG00000178372	CALML5	calmodulin like 5	0.353872	0.603103	-23.9497	NA	NA	0	0.184235	0.726107	-23.9497	0.456779	0.828721	23.0941	0.501742	0.806744	-23.0201	0.523999	0.781216	-22.9497
chr10	5488842	5489140	299	chr10:5488842-5489140	9	CAACCCAGCAGAGAGGCGGGAAAGGCAGAGCTGAGATCGGGTGGGGCCACCTGTGGTGGGGAAAGAGATGAGCTCACACCTGGAGATGGTAAACAGTGCAAAAGCAAGAAGAAGCTTACAGAAGGAGTCGTTGGGCCTTTGCCCCAGCTGCAGCCACGTGAGAGGGAAGCCAGGGGAGGAGCAAGGTGCAGGCATCTGTGGGCTGGGCAGGGCCTGACTGCACTGGGCCCAGGCTGGGAAGGCCTCACCTGCTTCTCCAGCGGGAACGGAGGGCGACCTGCGCAGCCTAGGCACTGCGG	Distal Intergenic	10	5498697	5499570	874	2	51806	ENST00000380332.5	10430	ENSG00000178372	CALML5	calmodulin like 5	0.353872	0.603103	-23.4351	NA	NA	0	0.184235	0.726107	-23.4351	0.456779	0.828721	22.5795	0.501742	0.806744	-22.5055	0.523999	0.781216	-22.4351
chr10	5557906	5558085	180	chr10:5557906-5558085	7	GGGAAGCTCAGTGCTCCAGGGAAGAGGCCTGAGAGCAGCGCCCCTGGGGGTCTCTGGGCAGAACCAGGAGAACCGGCCAGCGTCACTCAACAGTGTGCCCTGTGGCATGTCGTGGGGAGCGCAAGGGTCCCCGGAGCTGAGTGGGTGCTGCAGAGGAGCTGGGCTCATCGGGAAGGAGGT	Distal Intergenic	10	5549637	5554329	4693	2	105376380	ENST00000668112.1	-3577	ENSG00000287566	LOC105376380	uncharacterized LOC105376380	0.329114	0.603103	22.073	NA	NA	0	0.306975	0.726107	24.499	0.27781	0.682531	24.5364	0.649975	0.806744	-2.24477	0.350384	0.781216	-24.3921
chr10	5558085	5558264	180	chr10:5558085-5558264	7	TGGCCGGGGAGGGGCTGGGCTCATCGGGAAGGAGGTGGCCGGGGAAGGGCTGGGCTCATCGGGAAGGAGGTGGCCAGGGTGACCACGGCAGGAAGATGCAGGAGGCACAGAGAGGCCGGAGGGGTCATCTGCCCATCAGGGAATGCTGTGGTGCTGAGGACCCCGTATGCTGCTGGGGGT	Distal Intergenic	10	5549637	5554329	4693	2	105376380	ENST00000668112.1	-3756	ENSG00000287566	LOC105376380	uncharacterized LOC105376380	0.329114	0.603103	22.073	NA	NA	0	0.306975	0.726107	24.499	0.27781	0.682531	24.5364	0.649975	0.806744	-2.24477	0.350384	0.781216	-24.3921
chr10	5558383	5558682	300	chr10:5558383-5558682	8	CTCTTTGCTCTGACCCCCAGAGGAGCCTGGGCGGAGGCAGCAGGGGTTAGTCCAGAAGCTAGAAGGGCAAGCGGTGGGGGCAAGGGCACTGCACAGGGCTGGACGCCACCCCCACGCTGCCTCCTTAGCCATTTGCCCCCACCCCTGACTGCAGCCCCAATCCTCCACCACTGGGGAAGGAGTCGGTGCCCTCGGCCACCTTCCTGGAGGCAAGCTGCTGCCCAGGAGGGAGAGGCGAGGCCACTGTCCCCAGGAAGGAGACTCGGCTGCCTTCACACCCTCAAGCTGTGCCAGGGCACA	Distal Intergenic	10	5549637	5554329	4693	2	105376380	ENST00000668112.1	-4054	ENSG00000287566	LOC105376380	uncharacterized LOC105376380	0.329114	0.603103	22.073	NA	NA	0	0.306975	0.726107	24.499	0.27781	0.682531	24.5364	0.649975	0.806744	-2.24477	0.350384	0.781216	-24.3921
chr10	6019570	6019713	144	chr10:6019570-6019713	2	CAGGGTGTCTCTGTGAATGAGAAGCTCAGAGGCTGGTGGGAGACACGTGGTGGTGGTGAGGGAAGGTGTTCCATCTCTGCCTGGGGACCGTGCTTGGTCCTGGTCCTGGGTTCCCTCTTTCTGACACTTGCTTTGGGGCCTGCA	Promoter (<=1kb)	10	6010715	6020339	9625	2	3559	ENST00000649218.1	626	ENSG00000134460	IL2RA	interleukin 2 receptor subunit alpha	1	1	-3.35353	0.292615	0.704072	21.6508	0.65379	0.845217	-4.317	0.27781	0.682531	24.2032	0.649975	0.806744	-2.42392	0.596098	0.781216	-2.27953
chr10	6694164	6694315	152	chr10:6694164-6694315	1	CTGCAGGACAACTCATTTCTTGTTGTTGTTTTTTTTCACCCTTATTTCTTATGTGGCAACCCTGTTTTCCAACTCACAGATAAATGCAGTAAATCCGTATTTACCTCCTAAATACAGATTTGTAGAATTATATTAACTATGAAGTATTAGCC	Intron (ENST00000650342.1/100507127, intron 2 of 6)	10	6682513	6823789	141277	1	100507127	ENST00000650342.1	11651	ENSG00000238266	LINC00707	long intergenic non-protein coding RNA 707	0.353872	0.603103	-23.9497	NA	NA	0	0.184235	0.726107	-23.9497	0.456779	0.828721	23.0941	0.501742	0.806744	-23.0201	0.523999	0.781216	-22.9497
chr10	11073931	11074082	152	chr10:11073931-11074082	2	GAATATTCTTGTAATGGCCATAGAACTTGGAAGCTTTGAATTTGAAAACCTACCTTAGATAAGTGATTTCTAGCCTCCGTGCCACAGCCCTCGAGGGTCTGTAGTTGTTATCAGAAGTTCTAAATCCTTGGACACATCAAGTTCTGTCTGCA	Exon (ENST00000669017.1/439950, exon 5 of 6)	10	11082125	11096474	14350	2	439950	ENST00000663606.1	22392	ENSG00000237986	CELF2-AS2	CELF2 antisense RNA 2	0.694769	0.903135	0.275711	0.395985	0.71143	-0.174674	0.583869	0.845217	-0.185073	0.260093	0.682531	-0.340958	0.257117	0.704731	0.639132	0.592153	0.781216	0.0409919
chr10	11496304	11496455	152	chr10:11496304-11496455	1	CTGCAGTTGGCAATTACCAAGCCTTACGGAGATTCTGAGCTACTAATCAGGTTGCTTCTCCAATTCCCACTGCCAGCCTAGGATTTAGCTTCCTCAGGTTTGCTAAGTTTACTAAATGTCTGTCTGCATTCTCATTTTCCAAAACTGGTAGC	Intron (ENST00000277575.5/9712, intron 6 of 13)	10	11460510	11532275	71766	2	9712	ENST00000277575.5	35820	ENSG00000148429	USP6NL	USP6 N-terminal like	0.777395	0.994363	1.43516	0.968949	0.972761	0.413405	0.635501	0.845217	0.668291	0.898979	0.940684	0.137219	0.35688	0.754458	1.9043	0.990363	0.993683	0.502414
chr10	11736528	11736701	174	chr10:11736528-11736701	2	AGTTTCCAGTTTTTCTGTGCTTTTTTTTTCCCCATCTTTGTGGTTTTATCTACTTTTGGTCTTTGATGATGGTGATGTACAGATGGGTTTTCGGTGTGGATGTCCTTTCTGTTTGTTAGTTTTCCTTCTAACAGACAGGACCCTCAGCTGCAGGTCTGTTGGAATACCCTGCCG	Distal Intergenic	10	11742366	11764070	21705	1	79746	ENST00000496136.5	-5665	ENSG00000134463	ECHDC3	enoyl-CoA hydratase domain containing 3	0.735263	0.94602	-0.301322	0.508129	0.79282	0.880432	1	1	-0.620372	0.619709	0.879899	0.607051	0.519792	0.806744	0.107025	0.491169	0.781216	0.752271
chr10	11736701	11736874	174	chr10:11736701-11736874	3	GTGTGAGGTGTCAGTGTGCCCCTGCTGGGGGGTGCCTCCCAGTTAGGCTGCTCGGGGGTCAGGGGTCAGGGACCCACTTGAGGAGGCAGTCTGCCGGTTCTCAGATCTCCAGCTGCGTGCTGGGAGAACCACTGCTCTCTTCAAAGCTGTCAGACAGGGACATTTAAGTCTGCA	Distal Intergenic	10	11742366	11764070	21705	1	79746	ENST00000496136.5	-5492	ENSG00000134463	ECHDC3	enoyl-CoA hydratase domain containing 3	0.735263	0.94602	-0.407939	0.508129	0.79282	0.724798	1	1	-0.726989	0.619709	0.879899	0.451417	0.519792	0.806744	0.0319137	0.491169	0.781216	0.67219
chr10	11736874	11737047	174	chr10:11736874-11737047	5	AGAGGTTACTGCTGTCTTTTTGTTTGTCTGTGCCCTGCCCCCAGAGGTGGAGCCTACAGAGGCAGGCAGGCCTCCGTGAGCTGTGGTGGGTTCCACCCAGTTCGAGCTTCCCGGCTGCTTTGTTTACCTAAGCAAGCCTGGGCAATGGCGGGCACCCCTCCCCCAGCCTCGCTG	Distal Intergenic	10	11742366	11764070	21705	1	79746	ENST00000496136.5	-5319	ENSG00000134463	ECHDC3	enoyl-CoA hydratase domain containing 3	0.765434	0.980774	-0.822377	0.559287	0.855161	0.307393	0.980097	1	-0.902952	0.669367	0.879899	0.0887728	0.553059	0.806744	-0.433393	0.553967	0.781216	0.381402
chr10	13300010	13300161	152	chr10:13300010-13300161	19	CTGCAGACGGGCGGCGGCGCGAAGCTGCTCCATGGCTGCGGCGCGGGGAACCCCCACCCCTCCCGGCCTCTGCCCCATTTAGCCCAGCGGGCGGCTCCGCCTCCAGGCGCCGCCCCGGACTGGACGTAAGCGGGATTCCGGGCGGTGCCAGC	Promoter (<=1kb)	10	13277799	13300064	22266	2	5264	ENST00000263038.9	0	ENSG00000107537	PHYH	phytanoyl-CoA 2-hydroxylase	0.972134	1	0.0874108	0.428214	0.73461	5.14958	0.967269	0.999197	-0.781413	0.858173	0.940684	4.14958	0.983438	1	0.921284	0.170235	0.781216	6.01833
chr10	13300192	13300344	153	chr10:13300192-13300344	11	CCGCTAGAGTCCGCGCGCCGGGCAACCGCCCGGGGCTGAAGTCCTCCCCACACCATGATCCTTCCGTCCTTTATTTTCTTTCTTTTTAAAAAGAAACAAGATCTTGCTCTGTCGCCCAGGCTGGAGTGCAGTGCGCGATCATAGCTCACTGCA	Promoter (<=1kb)	10	13295228	13300097	4870	2	5264	ENST00000463730.1	-95	ENSG00000107537	PHYH	phytanoyl-CoA 2-hydroxylase	0.972134	1	0.0874108	0.428214	0.73461	5.14958	0.967269	0.999197	-0.781413	0.858173	0.940684	4.14958	0.983438	1	0.921284	0.170235	0.781216	6.01833
chr10	13324402	13324577	176	chr10:13324402-13324577	1	CTGCAGGCTTTTGTGTGAATGTAAGTTTTCAACTTTTTTGAGTGAATATCAAGGAGCACAATCGCTGCATCATATAATAACATATTTAGTTTCATAAGAAACTGCCAAACTGACTTTTAAAGTGGCTGTGCCAGTTTTCAGTCCTACCAGTAATAAATGAGAGTTCCTTCCTGTTT	Intron (ENST00000327347.10/22929, intron 7 of 8)	10	13333901	13340790	6890	2	22929	ENST00000425947.1	16213	ENSG00000086475	SEPHS1	selenophosphate synthetase 1	0.329114	0.603103	22.3603	0.891077	0.951591	1.01539	0.306975	0.726107	22.8136	0.753887	0.879899	0.0153892	0.649975	0.806744	0.260245	0.561579	0.781216	1.88414
chr10	13324577	13324752	176	chr10:13324577-13324752	3	TCTCTACATCCTTGCCAGCAGTTGGTATTATCAGTGTTTTTGGGTTTTTTTTGAGACAGGGTCTCGCTTTGTCACCCAGGCTGGAGTGAGGTGGTGCGATCACAGCTTACTGCAGCCTCGACCTCCTGGGCTCAAGGGATCCTCCCAACCTCAGCTTCCCAAGTAGCTGGGACTAA	Intron (ENST00000327347.10/22929, intron 7 of 8)	10	13333901	13340790	6890	2	22929	ENST00000425947.1	16038	ENSG00000086475	SEPHS1	selenophosphate synthetase 1	0.329114	0.603103	22.3603	0.891077	0.951591	1.01539	0.306975	0.726107	22.8136	0.753887	0.879899	0.0153892	0.649975	0.806744	0.260245	0.561579	0.781216	1.88414
chr10	13580688	13580941	254	chr10:13580688-13580941	2	TCCCTGCAGCTGAGACTGGTCCCTGTGGCCGAGACTGGTCCCTGTCGCCTGGGGTCATGCCAGTGCAGGGTGTAGCTGTGTGCCCTCAGCAACCCTTGTTCCCTGCAGATGAGGGACAGGTGGGTTGGCCTGAAGAGAATATCTGGAGAGAACATCATAGTCCTCACTGTGGTGGTTGTAACATATTGGTTGTAAGGTGCATCCTGAATTCAGAAACATTGAAATGTAAAAAAAAAGAGAGCACCTTAAAAATG	Distal Intergenic	10	13586939	13614060	27122	1	8559	ENST00000417658.5	-5998	ENSG00000165630	PRPF18	pre-mRNA processing factor 18	0.152084	0.603103	24.414	0.389207	0.704072	-23.381	0.203351	0.726107	24.0326	0.920918	0.940684	0.0100147	0.22065	0.681513	2.00872	0.244564	0.781216	-23.9257
chr10	14209761	14210024	264	chr10:14209761-14210024	1	CTGCAGTCCCAGCTAATCCCAGGAGACTGAGGTGAGAGGACCACTTGAACCCAGGAGGTCGTGGCTGCAGTGAGCTGTGATCATGCCACTGCCCTCCAACCTGGGTGACAGAGTGAGACCCTGTCCCAAAAGAAAAGGCTCAGGAGAGACACACAGAGGAGGAAGCCATGTGAAGATGGAAGCAGAGATTGGAGTGATGAGGCCACAAGGCAAGGAGAGTGACAAAGAGAGAAGGAAGGATTCCAGGAGGAGCCAACCCTGCAG	Intron (ENST00000357447.7/55691, intron 2 of 24)	10	14024376	14174366	149991	2	55691	ENST00000648761.1	-35395	ENSG00000151474	FRMD4A	FERM domain containing 4A	NA	NA	0	0.292615	0.704072	22.8013	0.484642	0.84435	21.7639	0.456779	0.828721	21.8013	0.501742	0.806744	-21.7273	0.146673	0.781216	22.8013
chr10	14627422	14627711	290	chr10:14627422-14627711	4	ATGCAAATATCTGTTAAAATAGCAGCTCTGCTAGACAGGAAGATAGAATGTAAAAAGAATACAGAGGTGAGGCTGGGTGCAATGGCTCACGCCTGTCATCCCAACACTTTGGAAGGCCAAAGTAGGAGGACCACTTGAGGCCAGGAGTTTGAGACCAGCCTGGACAACATTAACGACACCCCATCTCTACAAAGAAATTTTAAAAATTAGCCGTGGTTGAGCACACCTGTAGTTCCAGCTCCTTGGAAGGCTGAGGCAGGTAGATCGCTTGAGCCCAGGAGTTCAAGGCT	Intron (ENST00000181796.7/83641, intron 2 of 4)	10	14521876	14612552	90677	2	83641	ENST00000442012.5	-14870	ENSG00000065809	FAM107B	family with sequence similarity 107 member B	0.353872	0.603103	-21.3868	0.891077	0.951591	2.26029	0.641273	0.845217	1.78943	0.590902	0.879899	1.89233	0.152032	0.681513	-23.3486	0.841784	0.958968	1.46193
chr10	16598156	16598307	152	chr10:16598156-16598307	1	AGGCATGACTTAGTTAAGAACCTTGAGCTGGGAAGAGAATCCTGGATGATCCCGTGGGCTCAGTGTCATCAAAAGGGTCCTTATAAGAAAGCAGCAGGAGGGACCAGCTGCAGGGGTACACATCTGTAATCCCAGCACTTCAGGAGGCCAAG	Intron (ENST00000377921.7/6251, intron 7 of 7)	10	16526187	16528795	2609	1	101928701	ENST00000669251.1	71969	ENSG00000287925	LOC101928701	uncharacterized LOC101928701	NA	NA	0	NA	NA	0	NA	NA	0	NA	NA	0	NA	NA	0	NA	NA	0
chr10	16598307	16598458	152	chr10:16598307-16598458	3	GGCGGGAGGATTGCTTGAGGCCAGGCGTTCACGACCAGCCTGGGCCATACAGGGAGACCCTATCTCTACAAAAAGTAAAGTAAAAAAAAAAAAATTAGCCAGGTGTGGTGGAGCACACCTGTAGTCCCAGCTACTTACTTGGGAGGCTGCAT	Intron (ENST00000377921.7/6251, intron 7 of 7)	10	16526187	16528795	2609	1	101928701	ENST00000669251.1	72120	ENSG00000287925	LOC101928701	uncharacterized LOC101928701	NA	NA	0	NA	NA	0	NA	NA	0	NA	NA	0	NA	NA	0	NA	NA	0
chr10	16598458	16598609	152	chr10:16598458-16598609	2	TTGGGAGGATCGCTTGAGCCTGGGAGTTTGAGGCTGCAGTGAGCCGTGATCACACCACTGCATTCCAGCCTGGCCATAGGGCAAGACCTTAACAATCAATCAAAAATAAAAACAGGCAGGGGGTCAAAGTGAAAGAGATTTGAAGATGTTAC	Intron (ENST00000377921.7/6251, intron 7 of 7)	10	16526187	16528795	2609	1	101928701	ENST00000669251.1	72271	ENSG00000287925	LOC101928701	uncharacterized LOC101928701	NA	NA	0	NA	NA	0	NA	NA	0	NA	NA	0	NA	NA	0	NA	NA	0
chr10	17721354	17721540	187	chr10:17721354-17721540	2	TTGGCCTGCCTTGCTAGATTGGGGAAGTTCTCCTGGATAATATCCTGCAGAGTGTTTTCCAACTTGGTTCCATTCTCCCCGTCACTTTCAGGTACACCAATCAGACGTAGATTTGGTCTTTTCACATAGTCCCATATTTCTTGGAGGCTTTGTTCATTTCTTTTTATTCTTTTTTCTCTAAACTTCC	Distal Intergenic	10	17694926	17700241	5316	1	8027	ENST00000494250.1	26428	ENSG00000136738	STAM	signal transducing adaptor molecule	0.983078	1	-0.496312	0.815326	0.951591	-1.09847	0.833788	0.962191	0.0770711	0.424264	0.828721	-1.22207	0.873478	0.976383	-0.758197	0.780442	0.928082	-0.632913
chr10	17721620	17721767	148	chr10:17721620-17721767	2	TCTGCATTCTTCACGTAGTTCTCGAGCCTTGGCTTTCAGCTCCATCAGCTCCTTTAAGCACTCCTCTGTATTGGTTATTCTAGTTATACATTCATCTGAATTTTTTTCATAGTTTTTAACTTCTTTGCCTTTGGTTTGAATTTCCTCC	Distal Intergenic	10	17694926	17700241	5316	1	8027	ENST00000494250.1	26694	ENSG00000136738	STAM	signal transducing adaptor molecule	0.983078	1	-0.496312	0.815326	0.951591	-1.09847	0.833788	0.962191	0.0770711	0.424264	0.828721	-1.22207	0.873478	0.976383	-0.758197	0.780442	0.928082	-0.632913
chr10	18951092	18951243	152	chr10:18951092-18951243	3	TCCTGCTGATTGGTAGAGCCGAGTGGCCTGTTTTGTCAGGGCGCTGACTGGTGTATTTACAATCCCTGAGCTAGATATAAAGACTCTCCACATCTCCACCAGACTCAGGAGCCCAGCTGGCTTCACGTAGTGGATCCCACACCAGGGCTGCA	Distal Intergenic	10	19048801	19734478	685678	1	340895	ENST00000454679.7	-97558	ENSG00000204740	MALRD1	MAM and LDL receptor class A domain containing 1	0.972134	1	1.99268	0.371856	0.704072	-3.28912	0.667138	0.845217	2.5515	0.106834	0.682531	-4.28912	0.744146	0.869065	-0.0951294	0.757708	0.912001	-2.42037
chr10	18951243	18951394	152	chr10:18951243-18951394	8	AGGTGGAGCTGCCAGCCAGTCCCGCGCCGTGCGCTCGCATTCCTCAGCCCTTGGGTGGTCGATGGGACTGGGTGTCGTGGAGCAGGGGGTGGTGCTCGTTGGGGAGGCTCAGGCTGCACAGGAGCCCATGGAGTGGGTGGGAGGCTCAGGCA	Distal Intergenic	10	19048801	19734478	685678	1	340895	ENST00000454679.7	-97407	ENSG00000204740	MALRD1	MAM and LDL receptor class A domain containing 1	0.972134	1	1.99268	0.371856	0.704072	-3.93342	0.667138	0.845217	3.19931	0.106834	0.682531	-4.93342	0.744146	0.869065	-0.912426	0.757708	0.912001	-3.06467
chr10	18951394	18951545	152	chr10:18951394-18951545	7	ATGGCGGGCTGCAGGTCCCCAGCCCTGCCCCGCGGGAAGGCAGCTAAGGCTCGGTGAGAAATCGAGTGCAGTGCGGGTGGGCTGGCACTGCTGGGGGACCCATACACCCTCCGCAGCCACTGGCCCTGGTGCTAAGTCCCTTATTGCCTGGG	Distal Intergenic	10	19048801	19734478	685678	1	340895	ENST00000454679.7	-97256	ENSG00000204740	MALRD1	MAM and LDL receptor class A domain containing 1	0.765534	0.980774	0.72134	0.208436	0.704072	-4.89538	0.717805	0.863081	0.491126	0.226301	0.682531	-2.12012	0.854931	0.957971	0.622319	0.291331	0.781216	-4.46203
chr10	18951545	18951696	152	chr10:18951545-18951696	13	GGCCAGCAGGGCTGCCTGGCTGCTCCGAGCGCGGGGCCGCCAAGCCCACGCCCACCCGGAACTCCAGCTGGCCCGCAAGCGCCGCACGCAGCCCCGGTTCCCGTTCACGCCTGTCCCTCCACACCTCCCTGCAAGCTGAAGGAGTGGGCTGC	Distal Intergenic	10	19048801	19734478	685678	1	340895	ENST00000454679.7	-97105	ENSG00000204740	MALRD1	MAM and LDL receptor class A domain containing 1	0.644036	0.849049	0.602306	0.389207	0.704072	-24.7742	0.267894	0.726107	-0.361168	0.920918	0.940684	-1.25628	0.983438	1	1.53192	0.244564	0.781216	-24.6639
chr10	21063212	21063360	149	chr10:21063212-21063360	1	CTCCCCCATACCTGTCAGCTGTGCTTCTGACCTCCCTAGAGGCCCACGTGCTCACTTGTCATATTCATGGCAATGCTCAGAGATCATTCCATGATCACCATCAAGGACATGGGCTGCATCTTCTGCCTTCTATGATACTTAATGCTCTA	Intron (ENST00000675700.1/10529, intron 2 of 6)	10	20785664	21101130	315467	2	10529	ENST00000675114.1	37770	ENSG00000078114	NEBL	nebulette	0.506552	0.782886	2.83691	0.650754	0.941196	-3.49947	0.667138	0.845217	1.97514	0.567181	0.879899	-2.90878	0.435594	0.806744	3.18441	0.757708	0.912001	-2.82853
chr10	21063437	21063579	143	chr10:21063437-21063579	0	AATTTAACAAGTCATAATAAACAACATGGAGCTGAAATCCCTCTTTAATGAAATCCATGGAAACATGACAGAAATCACCCAAGTTTTCTATTCACATGTAGCAAATCAACAGTGGTTATATTTTTCTTCTGATTCTCACTGCA	Intron (ENST00000675700.1/10529, intron 2 of 6)	10	20785664	21101130	315467	2	10529	ENST00000675114.1	37551	ENSG00000078114	NEBL	nebulette	0.506552	0.782886	2.83691	0.650754	0.941196	-3.49947	0.667138	0.845217	1.97514	0.567181	0.879899	-2.90878	0.435594	0.806744	3.18441	0.757708	0.912001	-2.82853
chr10	21215185	21215397	213	chr10:21215185-21215397	1	CTGCAGTCCCAGCTACTCAGGAGGTAGGGCAGGAGGATTTCTTGAGGCCAGGAGTTTGAGGCTGCAGTGAGCTATGATCACGCCACTGTACTTCAGCCTAGGTGACAGGGCAAGAGCCTATCTCTTTTAAAAAGAGTTTTTAAAAGATCTGCACAAATGAAGAATATGTGTTTGCAATGGGCTGTCTTATTATGGGCATTTCATGGTGCTCAT	Intron (ENST00000675702.1/10529, intron 3 of 8)	10	20780050	21174931	394882	2	10529	ENST00000675700.1	-40254	ENSG00000078114	NEBL	nebulette	0.408133	0.677839	0.572363	0.585772	0.891991	0.0570882	0.572781	0.845217	0.344649	0.929254	0.943695	-0.654944	0.346098	0.74031	0.544334	0.248175	0.781216	0.675045
chr10	22128998	22129172	175	chr10:22128998-22129172	2	AGTTTCCAGTTTTTCTGTTCTGTTTTTTCCCCATCTTTGTGGTTTTATCTACTTTTGGTCTTTGATGATGTTGATGATGATGATGGGTTTTCGGTGTGGATGTCCTTTCTGTTTGTTAGTTTTCCTTCTAACAGACAGGACCCTCAGCTGCAGGTCTGTTGGAATACCCTGCCGT	Distal Intergenic	10	22208475	22218015	9541	2	340900	ENST00000422359.3	88843	ENSG00000223601	EBLN1	endogenous Bornavirus like nucleoprotein 1	0.299107	0.603103	-3.29768	0.456774	0.75726	-0.661118	0.219227	0.726107	-2.53369	0.554971	0.879899	0.532204	0.481852	0.806744	-2.65951	0.460305	0.781216	-1.31184
chr10	22129172	22129346	175	chr10:22129172-22129346	3	TGTGAGGTGTCAGTGTGCCCCTGCTTGGGGGTGCCTCCCAGTTAGGCTGCTCGGGGGTCAGGGGTCAGGGACCCACTTGAGGAGGCAGTCTGCCGGTTCTCAGATCTCCAGCTGCGTGCTGGGAGAACCACTGCTCTCTTCAAAGCTGTCAGACAGGGACACTTAAGTCTGCAGA	Distal Intergenic	10	22208475	22218015	9541	2	340900	ENST00000422359.3	88669	ENSG00000223601	EBLN1	endogenous Bornavirus like nucleoprotein 1	0.299107	0.603103	-3.29768	0.456774	0.75726	-0.661118	0.219227	0.726107	-2.53369	0.554971	0.879899	0.532204	0.481852	0.806744	-2.65951	0.460305	0.781216	-1.31184
chr10	22408222	22408396	175	chr10:22408222-22408396	2	AGTTTCCAGTTTTTCTGTTCTGTTTTTTCCCCATCTTTGTGGTTTTATCTACTTTTGGTCTTTGATGATGTTGATGATGATGATGGGTTTTCGGTGTGGATGTCCTTTCTGTTTGTTAGTTTTCCTTCTAACAGACAGGACCCTCAGCTGCAGGTCTGTTGGAATACCCTGCCGT	Intron (ENST00000376603.6/9576, intron 8 of 10)	10	22391805	22454224	62420	1	105376449	ENST00000487973.1	16417	NA	LOC105376449	uncharacterized LOC105376449	0.979795	1	0.130064	0.123414	0.704072	22.884	0.795906	0.927284	-0.564997	0.048546	0.576841	23.5043	0.755974	0.877329	0.780956	0.939943	0.986213	0.0917098
chr10	22408396	22408570	175	chr10:22408396-22408570	3	TGTGAGGTGTCAGTGTGCCCCTGCTGGGGGGTGCCTCCCAGTTAGGCTGCTCGGGGGTCAGGGGTCAGGGACCCACTTGAGGAGGCAGTCTGCCGGTTCTCAGATCTCCAGCTGCGTGCTGGGAGAACCACTGCTCTCTTCAAAGCTGTCAGACAGGGACACTTAAGTCTGCAGA	Intron (ENST00000376603.6/9576, intron 8 of 10)	10	22391805	22454224	62420	1	105376449	ENST00000487973.1	16591	NA	LOC105376449	uncharacterized LOC105376449	0.979795	1	0.130064	0.123414	0.704072	22.884	0.795906	0.927284	-0.564997	0.048546	0.576841	23.5043	0.755974	0.877329	0.780956	0.939943	0.986213	0.0917098
chr10	22532901	22533095	195	chr10:22532901-22533095	1	CTCACTGCAGCCTCAAACTCCTAGGCTCAATTAGATCCTCCTGCCTCAGCGTCCTGAGTAGCTGGGACTACAGGTATGCACCATCACATTCAGCTAATTTTTTAAAATTTTAATTGTTATTTTTTTTTAGCAACAGGATCTCTCTAGGTTGCCCAGGCTGGTCTCAAACTCCTGGCCTCAAGTGATCCCCCTGCA	Distal Intergenic	10	22536893	22539635	2743	2	5305	ENST00000474335.1	6540	ENSG00000150867	PIP4K2A	phosphatidylinositol-5-phosphate 4-kinase type 2 alpha	0.353872	0.603103	-23.1018	0.292615	0.704072	23.8521	0.690137	0.845217	-0.287221	0.27781	0.682531	23.5807	0.325495	0.704731	-23.5067	0.561579	0.781216	1.75025
chr10	23855596	23855747	152	chr10:23855596-23855747	4	CTGCAGAGTGTTTTCCAACTTGGTTCCATTCTCCCCGTCACTTTCAGGTACACCAATCAGACGTAGATTTCGTCTTTTCATGTAGTCCCATATTTCTTGGAGGCTTTGTTTGTTTCTTTTTATTCTTTTTTCTCTAAACTTTCCTTCTCGCT	Intron (ENST00000376462.5/56243, intron 1 of 18)	10	23694782	23877495	182714	1	56243	ENST00000481700.1	160814	ENSG00000120549	KIAA1217	KIAA1217	0.329114	0.603103	23.1884	0.292615	0.704072	23.2624	0.306975	0.726107	22.9589	0.27781	0.682531	22.9964	0.614107	0.806744	1.59225	0.561579	0.781216	1.73664
chr10	24489146	24489330	185	chr10:24489146-24489330	1	CTGCAGTTGTTACTGACTACAGTGGGTTGAGGCTGCAGTGAGCTATGATCATTCGTGCTGTACTCCAGCCTGGGAACAGAGTGAGACCTTGTCTCAAAAAAAAAAAAAGTTCTATAAATGGAGTCACTGGCTAAAAATCATCCCCTAACTGGTTAGGAAGGTTAATGCTTCAGATTAGGGACTAA	Intron (ENST00000376462.5/56243, intron 7 of 18)	10	24494974	24513347	18374	1	56243	ENST00000460373.1	-5644	ENSG00000120549	KIAA1217	KIAA1217	0.329114	0.603103	23.0006	0.123414	0.704072	23.4203	0.203351	0.726107	23.2203	0.176959	0.682531	23.2578	0.983438	1	0.654296	0.197631	0.781216	1.49009
chr10	24506721	24506872	152	chr10:24506721-24506872	0	TCTGTCTGGAGGCACTTTTCAGATCTTGGTGCAGGAAGGAAAAACCCAAGCATGGCACTGACAGTGAGTTGAGGAGATAAGACCAAAGTTTAGAGAGAGCTGAAACAGCTAGAACTGGTGGACTGGAGAACCAAACACAAGAAAGCTCTGCA	Intron (ENST00000376462.5/56243, intron 10 of 18)	10	24494974	24513347	18374	1	56243	ENST00000460373.1	11747	ENSG00000120549	KIAA1217	KIAA1217	0.972134	1	0.576606	0.389207	0.704072	-22.0738	0.690137	0.845217	-0.386868	0.717538	0.879899	-1.23058	0.614107	0.806744	1.50622	0.350384	0.781216	-21.974
chr10	25252398	25252568	171	chr10:25252398-25252568	0	TAGAGCTTCCAGTTTTTCTGTTCTGTTTTTTCCCCATCTTTGTGGTTTTATCTACTTTTGGTCTTTGATGATGGTGATGTACAGAGGGGTTTTTGGTGTGGATGTCCTTTCTGTTTGTTAGTTTTCCTTCTAACAGACAGGACCCTCAGCTGCAGGTCTGTTGGAATACCC	Intron (ENST00000650135.1/57512, intron 3 of 11)	10	25158072	25176276	18205	2	100128811	ENST00000449643.1	-76122	ENSG00000233642	GPR158-AS1	GPR158 antisense RNA 1	0.583211	0.813605	-0.0931123	0.940679	0.951591	-1.87763	0.497166	0.845217	0.187981	0.851129	0.940684	-1.77651	0.780967	0.891099	-0.315843	0.7434	0.908329	-1.33938
chr10	25252568	25252738	171	chr10:25252568-25252738	3	CTGCCGTGTGAGGTGTCAGTGTGCCCCTGCTGGGGGGTGCCTCCCAGTTAGGCTGCTCAGGGGTCAGGGGTCAGGGACCCACTTGAAGAGGCAGTCTGCCGGTTCTCAGATCTCCAGCTGCGTGCTGGGAGAACCACTGCTCCCTTCAAAGCTGTCAGACAGGGACATTTA	Intron (ENST00000650135.1/57512, intron 3 of 11)	10	25158072	25176276	18205	2	100128811	ENST00000449643.1	-76292	ENSG00000233642	GPR158-AS1	GPR158 antisense RNA 1	0.583211	0.813605	-0.0931123	0.940679	0.951591	-1.87763	0.497166	0.845217	0.187981	0.851129	0.940684	-1.77651	0.780967	0.891099	-0.315843	0.7434	0.908329	-1.33938
chr10	25252738	25252908	171	chr10:25252738-25252908	3	AAGTCTGCAGAGGTTACTGCTGTCTTTTTGTTTGTCTGTGCCCTGCCCCCAGAGGTGGAGGCTACAGAGGCAGGCAGGCCTCCTTGAGCTGTGGTGGGCTCCACCCAGTTCGAGCTTCCTGGCTGCTTTGTTTACCTAAGCAAGCCTGGGCAATGGCGGGCGCCCCTCCCC	Intron (ENST00000650135.1/57512, intron 3 of 11)	10	25158072	25176276	18205	2	100128811	ENST00000449643.1	-76462	ENSG00000233642	GPR158-AS1	GPR158 antisense RNA 1	0.583211	0.813605	0.12928	0.940679	0.951591	-1.50946	0.517875	0.845217	0.165246	0.851129	0.940684	-1.40833	0.780967	0.891099	0.0297165	0.7434	0.908329	-1.05461
chr10	26598359	26598501	143	chr10:26598359-26598501	0	CCTACCAGAAGTAAGCTTCATGGGGGCACAATTATTTTTCCTGTTATTTTTCATTGCTGTGCCCTTAGCACTTAGAACAGTGTCTGGCACATACTGAGAACCTAAATATTCAATAAATATTTGTTGAATGAATAAACTCTGCA	Intron (ENST00000637960.1/101929117, intron 7 of 7)	10	26591310	26594271	2962	1	645528	ENST00000637359.1	7049	ENSG00000233261	FAM238A	family with sequence similarity 238 member A	0.148394	0.603103	2.15778	0.427323	0.73461	-1.32578	0.325918	0.760969	1.50767	0.554971	0.879899	-0.775821	0.0731085	0.61358	2.06519	0.460305	0.781216	-1.16667
chr10	26857579	26857793	215	chr10:26857579-26857793	0	GGCTGCAGTAAGCCATGATGGCATCACTGCACTCCAGCCTGAGCAACAGAGCAAGACTGTGTCTCAAAAAAAAAAAAAAAAAAACTTTCTATTTTTAGTATTATTTACCCCATGGCAACTGTTAAAACCCTGTCCTTGCATATACCTGTGGTCTCAGCTACATGGGAGGCTGAGGTGGGAGGACTGCTTGAGCCCAGGAGGTCAAGGCTGCAGTG	Intron (ENST00000376170.8/10006, intron 1 of 9)	10	26746593	26860892	114300	2	10006	ENST00000376170.8	3099	ENSG00000136754	ABI1	abl interactor 1	NA	NA	0	NA	NA	0	0.484642	0.84435	23.0006	0.456779	0.828721	23.0381	0.501742	0.806744	-22.9641	0.523999	0.781216	-22.8937
chr10	29678994	29679293	300	chr10:29678994-29679293	4	TCAGGAGTTCGAGACCAGCCTGGCCAATATGGTGAAACCCCATCTCTACTAAAAATGCAAAATTAGCCTGGCATGGTGGCGCACGCCTGTAATCCCAGCTACTTGGGTGGCTGAGGCAGGAGAATCACTTGAACCTGAAAGGCAGAGGCTGCAGTGAGCAGAGATTGTGCCACTGCAATCCAGCCTGGGCAACAGAGAGAGACTCCGTCACAAACAAACAAACAAACAAAACAAAAAAACACCTGGGTTTAGAGCTGCTTGTAGGCAACTAAGGGGACTAACTTGCTCCACTAACTTTTA	Intron (ENST00000375400.7/6840, intron 2 of 35)	10	29670982	29686622	15641	2	6840	ENST00000490031.1	7329	ENSG00000197321	SVIL	supervillin	0.353872	0.603103	-23.3868	0.389207	0.704072	-24.5024	0.690137	0.845217	0.353726	0.717538	0.879899	-1.97118	0.325495	0.704731	-24.2113	0.350384	0.781216	-24.1409
chr10	29679483	29679782	300	chr10:29679483-29679782	5	AAGCATTGAGTACAGATTGGAAAGTCTGAAGATGAATGATTAGAAAGCCAGCCACTTTTTTTTCTTTTTTCTTTTCCTTTTTTTTTTTTGAGATGGGGGTCCCACTCTGTTGCCCTGGCTGGAGTGCAGTGGCGCTGATCACGGCTCACTGCAGCCTCGTCTGCCCAAGCTCTAGAGATTCTCCTACCTCAGCCTCCTGAGCAGCTGGGACCGCAGGCACACACCACCATGCCCCGCCAAGCCAGCCACTTTCTAAATACCTTTCTGTTGGGTGGCACTGCTAGAGGTCAGGGATCCAGT	Intron (ENST00000375400.7/6840, intron 2 of 35)	10	29670982	29686622	15641	2	6840	ENST00000490031.1	6840	ENSG00000197321	SVIL	supervillin	0.353872	0.603103	-22.9718	0.389207	0.704072	-23.9174	0.690137	0.845217	0.183801	0.717538	0.879899	-1.80125	0.325495	0.704731	-23.6789	0.350384	0.781216	-23.6085
chr10	30080542	30080693	152	chr10:30080542-30080693	0	ATCATGACATTTCTCCATTGACAAACCTATGTTCAAGCCACTGTCAAATTCAGATGCCTGTATCACATGCTTCCTACATTTAAGTTCCCAATCTCATGATTCATTAACTCACCCCCAGTCATTAGGACAGCCCCCAATCTCACCACTCTGCA	Intron (ENST00000465712.1/57608, intron 1 of 2)	10	30012803	30059586	46784	2	57608	ENST00000375377.2	-20956	ENSG00000165757	JCAD	junctional cadherin 5 associated	0.972134	1	1.02589	0.389207	0.704072	-24.381	0.690137	0.845217	0.0624167	0.717538	0.879899	-1.67987	0.614107	0.806744	1.9555	0.350384	0.781216	-24.1122
chr10	30603339	30603487	149	chr10:30603339-30603487	0	GCTGCAGAATCAACTAATTGGTTAGACTCACCATTTGCATAGCATAGTGCCTGGCACAGTTACTCACATATTTGGGGTTTTTTGGTTCTGTTTTGGTGGGCTTTTTTTTTTTTTTTTCCACATAGATTCTCACTGTAGCCCAGGCTGCA	Distal Intergenic	10	30587706	30591092	3387	1	105376479	ENST00000648759.1	15633	NA	LOC105376479	uncharacterized LOC105376479	NA	NA	0	0.292615	0.704072	25.174	0.484642	0.84435	24.1365	0.456779	0.828721	24.174	0.501742	0.806744	-24.1	0.146673	0.781216	25.174
chr10	32397101	32397350	250	chr10:32397101-32397350	7	AGTCCCAGCTACTCGGGAGGCTGAGGCAGGAGAATGGCGTGAACCCGGGAGGCGGAGCTTGCAGTGAGCCGAGATCGTGCCACTGCACTCCAACCTGGGCGACAGAGACTCTGTCTCAAAAAAAAAAAAAAAAAAGGAAAAAGAAAAAGAAAAAAATTAGCCAGGTGTGGTGGTGTGTGACTGTAAGTCCCAGCTACTCAGGAGGCTGTGAGGCAGGAGGATCACTTGAGCCTAGGAGTTAGATGCTGCA	Distal Intergenic	10	32267751	32378798	111048	2	80314	ENST00000375110.6	-18303	ENSG00000120616	EPC1	enhancer of polycomb homolog 1	0.353872	0.603103	-23.7799	0.292615	0.704072	24.437	0.690137	0.845217	-0.380331	0.27781	0.682531	24.2033	0.325495	0.704731	-24.1293	0.561579	0.781216	1.65714
chr10	33355370	33355668	299	chr10:33355370-33355668	2	TCCCAGCCATGCTGCCTTCTTCCTCTTCTTTATACCAGCCAAGCGCATTGCCACTTCAGGGCTTTGGAACTTCCTCTTACCTCCCCCCTCGTAGATCTCTACAAGACTCATTCCCCTTTGGCACTCAAGTTTCAAATTAAGTCACCCCTGCAGTCACTCTCTGTCACATCCCTCTGTGTGACAGCAATTAGAGTTCTTGTTGGCACTTCTCCCTCAGTGCTCACTCAGTTAGTCAACAAGTTTTATTTTTCTCCATTCCTCTCTTTTCCTACTGCCAACACCCTAATAGAAGCCACCTT	Distal Intergenic	10	33177492	33336262	158771	2	8829	ENST00000265371.8	-19108	ENSG00000099250	NRP1	neuropilin 1	0.101057	0.603103	2.07562	0.253507	0.704072	2.03621	0.190514	0.726107	1.69628	0.142879	0.682531	1.71446	0.0966224	0.681513	1.41843	0.545816	0.781216	1.30391
chr10	33515937	33516113	177	chr10:33515937-33516113	2	GAGTTTCCAGTTTTTCTGTTCTGTTTTTTCCCCATCTTTGTGGTTTTCTCTACTTTTGGTCTTTGATGATGGTGATGTACAGATGGGTTTTCGGTATAGATGTCCTTTCTGGTTGTTAGTTTTCCTTCTAACAGACAGGACCCTCAGCTGCAGGTCTGTTGGAATACCCTGCCGTGT	Distal Intergenic	10	33578931	33600040	21110	2	105376490	ENST00000457848.1	83927	NA	LINC02628	long intergenic non-protein coding RNA 2628	0.367326	0.622023	0.575938	0.643895	0.941196	-0.461668	0.772927	0.909117	0.31957	0.555781	0.879899	-0.551396	0.246361	0.704731	0.581088	0.837172	0.958968	-0.2041
chr10	33516113	33516289	177	chr10:33516113-33516289	3	TGAGGTGTCAGTGTGCCCCTGCTGGGGGGTGCCTCCCAGTTAGGCTGCTCGGGGGTCAGGGGTCAGGGACCCACTTGAGGAGGCAGTCTGCCCGTTCTCAGATCTCCAGCTGCGTGCTGGGAGAACCACTGCTCTCTTCAAAGCTGTCAGACAGGGACACTTAAGTCTGCAGAGGTT	Distal Intergenic	10	33578931	33600040	21110	2	105376490	ENST00000457848.1	83751	NA	LINC02628	long intergenic non-protein coding RNA 2628	0.367326	0.622023	0.575938	0.643895	0.941196	-0.461668	0.772927	0.909117	0.31957	0.555781	0.879899	-0.551396	0.246361	0.704731	0.581088	0.837172	0.958968	-0.2041
[truncated: 8,588 more rows]

## Sheet: Annotation
Cisplatin_Extreme DMR R vs S Pv<=.05							Cis_Low DMRs R vs S Pv<=.05							Cisplatin_High DMRs R vs S Pv<=.05
Consequence	Counts	%	AnnotatVon	BONF	%		Consequence	Counts	%	AnnotatVon	BONF	%		Consequence	Counts	%	AnnotatVon	BONF	%
[truncated: 26 more rows]

[truncated: 1 more sheets: Annotation 0.01]
