# Supplementary material
Source: Research Square preprint supplement (doi:10.21203/rs.3.rs-9159771/v1)
Supplement: Supplementary file 1 [file bd6ba854569721f6d99307b1.docx]

Supplementary table 1

a)

b)

Supplementary table 2

b)

a)
